# Supplementary material for: A Resident Prophage Metabolically Reprograms Root-Colonizing Pseudomonas to Modulate Plant Physiology
Source: Research Square preprint supplement (doi:10.21203/rs.3.rs-8002115/v1), 2025-11-19
Supplement: Supplementary file 1 [file c2e196f9ba7d2d536c06d6dd.xlsx]

## Sheet: Tab 1. Table of terms sheet
Legend of key terms		Notes
P. simiae	Pseudomonas simiae
A. thaliana	Arabidopsis thaliana	In tabs may be denoted as A.t.
B. distachyon	Bracypodium distachyon	In tabs may be denoted as B.d.
Control	Control treatment	Also denoted as blank in experiments
WT	Wild-type
GFP	Green Fluorescent Protein
P. simiae WCS417	WT P. simiae WCS417 strain	Also denoted as WCS417 in tabs
SB642	GFP positive P. simiae WCS417 strain
Δphage	GFP positive P. simiae WCS417 mutant strain	Also denoted as dphage in experiments
CFU	Colony Forming Units
PM01	Biolog Phenotype MicroArray plate 01	Preconfigured 96-well plate containing different classes of chemical compounds for carbon utilization assays
PM02	Biolog Phenotype MicroArray plate 02	Preconfigured 96-well plate containing different classes of chemical compounds for carbon utilization assays
FC	Fold change	Appears in tab related to metabolomics data analysis
AvPkHt	Average Peak Height	Appears in tab related to metabolomics data analysis
Tab number	Tab name	Tab content	Notes
1	Table of terms sheet	Legend of key terms and tab table of contents
2	Growth curve data	All strains grown on LB media	Corresponding data to Fig S4
3	A. thaliana root weight	Root weight of plants used for CFU data calculations	Data associated with Fig 2
4	B. distachyon root weight	Root weight of plants used for CFU data calculations	Data associated with Fig 2
5	A. thaliana CFU data	A. thaliana CFU data calculations	Data associated with Fig 2
6	B. distachyon CFU data	B. distachyon CFU data calculations	Data associated with Fig 2
7	Biolog dphage_1 PM01	Biolog data for dphage biological replicate 1 using the PM01 carbon utilization assay plate	Data associated with Fig S5
8	Biolog dphage_2 PM01	Biolog data for dphage biological replicate 2 using the PM01 carbon utilization assay plate	Data associated with Fig S5
9	Biolog dphage_3 PM01	Biolog data for dphage biological replicate 3 using the PM01 carbon utilization assay plate	Data associated with Fig S5
10	Biolog dphage_4 PM01	Biolog data for dphage biological replicate 4 using the PM01 carbon utilization assay plate	Data associated with Fig S5
11	Biolog dphage_5 PM01	Biolog data for dphage biological replicate 5 using the PM01 carbon utilization assay plate	Data associated with Fig S5
12	Biolog dphage_6 PM01	Biolog data for dphage biological replicate 6 using the PM01 carbon utilization assay plate	Data associated with Fig S5
13	Biolog dphage_7 PM01	Biolog data for dphage biological replicate 7 using the PM01 carbon utilization assay plate	Data associated with Fig S5
14	Biolog dphage_8 PM01	Biolog data for dphage biological replicate 8 using the PM01 carbon utilization assay plate	Data associated with Fig S5
15	Biolog dphage_9 PM01	Biolog data for dphage biological replicate 9 using the PM01 carbon utilization assay plate	Data associated with Fig S5
16	Biolog SB642_1 PM01	Biolog data for SB642 biological replicate 1 using the PM01 carbon utilization assay plate	Data associated with Fig S5
17	Biolog SB642_2 PM01	Biolog data for SB642 biological replicate 2 using the PM01 carbon utilization assay plate	Data associated with Fig S5
18	Biolog SB642_3 PM01	Biolog data for SB642 biological replicate 3 using the PM01 carbon utilization assay plate	Data associated with Fig S5
19	Biolog SB642_4 PM01	Biolog data for SB642 biological replicate 4 using the PM01 carbon utilization assay plate	Data associated with Fig S5
20	Biolog SB642_5 PM01	Biolog data for SB642 biological replicate 5 using the PM01 carbon utilization assay plate	Data associated with Fig S5
21	Biolog SB642_6 PM01	Biolog data for SB642 biological replicate 6 using the PM01 carbon utilization assay plate	Data associated with Fig S5
22	Biolog SB642_7 PM01	Biolog data for SB642 biological replicate 7 using the PM01 carbon utilization assay plate	Data associated with Fig S5
23	Biolog SB642_8 PM01	Biolog data for SB642 biological replicate 8 using the PM01 carbon utilization assay plate	Data associated with Fig S5
24	Biolog SB642_9 PM01	Biolog data for SB642 biological replicate 9 using the PM01 carbon utilization assay plate	Data associated with Fig S5
25	Biolog dphage_1 PM02	Biolog data for dphage biological replicate 1 using the PM02 carbon utilization assay plate	Data associated with Fig S5
26	Biolog dphage_2 PM02	Biolog data for dphage biological replicate 2 using the PM02 carbon utilization assay plate	Data associated with Fig S5
27	Biolog dphage_3 PM02	Biolog data for dphage biological replicate 3 using the PM02 carbon utilization assay plate	Data associated with Fig S5
28	Biolog dphage_4 PM02	Biolog data for dphage biological replicate 4 using the PM02 carbon utilization assay plate	Data associated with Fig S5
29	Biolog dphage_5 PM02	Biolog data for dphage biological replicate 5 using the PM02 carbon utilization assay plate	Data associated with Fig S5
30	Biolog dphage_6 PM02	Biolog data for dphage biological replicate 6 using the PM02 carbon utilization assay plate	Data associated with Fig S5
31	Biolog SB642_1 PM02	Biolog data for SB642 biological replicate 1 using the PM01 carbon utilization assay plate	Data associated with Fig S5
32	Biolog SB642_2 PM02	Biolog data for SB642 biological replicate 2 using the PM02 carbon utilization assay plate	Data associated with Fig S5
33	Biolog SB642_3 PM02	Biolog data for SB642 biological replicate 3 using the PM02 carbon utilization assay plate	Data associated with Fig S5
34	Biolog SB642_4 PM02	Biolog data for SB642 biological replicate 4 using the PM02 carbon utilization assay plate	Data associated with Fig S5
35	Biolog SB642_5 PM02	Biolog data for SB642 biological replicate 5 using the PM02 carbon utilization assay plate	Data associated with Fig S5
36	Biolog SB642_6 PM02	Biolog data for SB642 biological replicate 6 using the PM02 carbon utilization assay plate	Data associated with Fig S5
37	A. thaliana_Met_ID_PkHt	A. thaliana metabolomics data normalized by peak height	Corresponding data to Fig 3
38	B. distachyon_Met_ID_PkHt	B. distachyon metabolomics data normalized by peak height	Corresponding data to Fig 3
39	Root architecture data	root architecture data for controls as well as SB642 and dphage treated plants	Corresponding data to Fig 4
40	Shoot dry weight data	Shoot dry weight for controls as well as SB642 and dphage treated plants	Corresponding data to Fig 4
41	Temperature stress data	B. distachyon root and shoot weight for controls as well as SB642 and dphage treated plants at 22oC and 37oC	Corresponding data to Fig 5

## Sheet: Tab 2. Growth curve data
Time	WCS417	WCS417	WCS417	SB642	SB642	SB642	Δphage	Δphage	Δphage	blank	blank	blank	Time	WCS417	WCS417	WCS417	SB642	SB642	SB642	Δphage	Δphage	Δphage	blank	blank	blank	Time	WCS417	WCS417	WCS417	SB642	SB642	SB642	Δphage	Δphage	Δphage	blank	blank	blank	Time	WCS417	WCS417	WCS417	SB642	SB642	SB642	Δphage	Δphage	Δphage	blank
	1	1	1	1	1	1	1	1	1	1	1	1		2	2	2	2	2	2	2	2	2	2	2	2		3	3	3	3	3	3	3	3	3	3	3	3		4	4	4	4	4	4	4	4	4	4
0	0.1059	0.1033	0.1032	0.101	0.1036	0.1019	0.1008	0.1007	0.1003	0.0949	0.0951	0.0951	0	0.1042	0.1057	0.1086	0.1067	0.1059	0.105	0.102	0.103	0.1021	0.0978	0.096	0.0951	0	0.1042	0.1037	0.1042	0.1014	0.1025	0.1022	0.1025	0.1024	0.1022	0.095	0.0952	0.0951	0	0.1031	0.1042	0.1021	0.1015	0.1033	0.1018	0.1028	0.1029	0.103	0.095
0.166669	0.1056	0.1034	0.1034	0.1009	0.1033	0.1019	0.1008	0.1006	0.1003	0.0949	0.095	0.0951	0.166671	0.1043	0.1057	0.1061	0.104	0.1054	0.105	0.1013	0.1021	0.1019	0.0985	0.0957	0.0952	0.166671	0.1042	0.1034	0.1042	0.1004	0.1019	0.1013	0.1012	0.1011	0.1006	0.0949	0.0952	0.0949	0.166671	0.1033	0.1044	0.1024	0.1017	0.1032	0.1018	0.1033	0.1031	0.1032	0.095
0.333341	0.1055	0.1039	0.1038	0.1011	0.1038	0.102	0.1009	0.1009	0.1005	0.095	0.0951	0.0952	0.333341	0.1045	0.1056	0.1064	0.1042	0.1056	0.1049	0.1014	0.102	0.1019	0.0986	0.0957	0.0951	0.33334	0.1044	0.1038	0.1045	0.1002	0.1018	0.1011	0.1009	0.1009	0.1005	0.0951	0.0953	0.095	0.333342	0.1033	0.1048	0.1022	0.1018	0.1031	0.1017	0.1032	0.1032	0.1034	0.0949
0.500011	0.1054	0.1041	0.104	0.1013	0.104	0.1024	0.1013	0.1011	0.1008	0.0949	0.0952	0.0952	0.500012	0.1046	0.1059	0.1066	0.1042	0.1056	0.105	0.1016	0.102	0.102	0.0987	0.0957	0.095	0.500011	0.1045	0.1039	0.1046	0.1002	0.1016	0.101	0.1011	0.1008	0.1004	0.095	0.0952	0.095	0.500013	0.1036	0.1044	0.1022	0.1019	0.1031	0.1018	0.1031	0.1033	0.1035	0.095
0.666682	0.1062	0.1046	0.1043	0.1016	0.1042	0.1025	0.1014	0.1012	0.1009	0.0948	0.095	0.0952	0.666683	0.1049	0.1061	0.1069	0.1044	0.1057	0.1052	0.1016	0.1022	0.1022	0.0995	0.0957	0.0951	0.666684	0.1049	0.1043	0.105	0.1003	0.1017	0.1009	0.101	0.1008	0.1007	0.095	0.0953	0.095	0.666686	0.104	0.1047	0.1024	0.102	0.1039	0.1019	0.1034	0.1034	0.1039	0.0948
0.833352	0.1066	0.1052	0.1047	0.102	0.1046	0.1032	0.1018	0.1016	0.1014	0.095	0.0951	0.0954	0.833353	0.1053	0.1066	0.1073	0.1046	0.1061	0.1057	0.1018	0.1033	0.1026	0.0998	0.0957	0.0952	0.833355	0.1054	0.105	0.1056	0.1005	0.1019	0.1012	0.1012	0.1011	0.101	0.095	0.0953	0.0951	0.833357	0.1045	0.1056	0.1029	0.1025	0.1041	0.1025	0.1038	0.1039	0.1045	0.095
1.00002	0.1073	0.1058	0.1053	0.1025	0.1054	0.1036	0.1023	0.1021	0.1019	0.095	0.0952	0.0952	1.00002	0.106	0.1073	0.1083	0.1051	0.1066	0.1062	0.1022	0.103	0.1031	0.0994	0.0957	0.0952	1.00002	0.1058	0.1058	0.1061	0.1008	0.1021	0.1015	0.1018	0.1015	0.1013	0.0951	0.0953	0.0951	1.00003	0.1053	0.106	0.1032	0.1029	0.1046	0.103	0.1042	0.1045	0.1051	0.0949
1.16669	0.1076	0.1065	0.1059	0.1029	0.1059	0.1042	0.1026	0.1025	0.1025	0.0951	0.0951	0.0953	1.16669	0.1066	0.1082	0.109	0.1058	0.1073	0.1067	0.1026	0.1034	0.1037	0.0993	0.0957	0.0953	1.16669	0.1066	0.1066	0.1068	0.1012	0.1024	0.1019	0.1023	0.1019	0.1017	0.0951	0.0953	0.0951	1.1667	0.1058	0.1066	0.1036	0.1034	0.105	0.1034	0.1048	0.1049	0.1054	0.0948
1.33336	0.1086	0.1076	0.1071	0.1036	0.1067	0.1052	0.1032	0.1031	0.1031	0.0951	0.0951	0.0953	1.33336	0.1076	0.1092	0.1099	0.1064	0.1082	0.1075	0.1033	0.1041	0.1044	0.099	0.0956	0.0951	1.33336	0.1073	0.1077	0.1078	0.1016	0.103	0.1024	0.1029	0.1025	0.1023	0.0952	0.0953	0.095	1.33337	0.106	0.1069	0.1038	0.1037	0.1052	0.1038	0.105	0.105	0.1056	0.095
1.50003	0.109	0.1081	0.1089	0.1042	0.1072	0.1055	0.1036	0.1036	0.1038	0.095	0.0952	0.0954	1.50004	0.1086	0.1105	0.1111	0.1072	0.1091	0.1086	0.1038	0.1048	0.1051	0.0992	0.0958	0.0952	1.50003	0.1085	0.1087	0.1087	0.1022	0.1037	0.1029	0.1036	0.1032	0.1029	0.0953	0.0952	0.0951	1.50004	0.1064	0.1076	0.1043	0.1042	0.1056	0.1042	0.1053	0.1054	0.1059	0.0948
1.6667	0.1098	0.1093	0.1085	0.1048	0.1078	0.1063	0.1041	0.1042	0.1042	0.0951	0.0951	0.0954	1.66671	0.1096	0.1117	0.1122	0.1082	0.11	0.1094	0.1045	0.1057	0.1059	0.0996	0.0957	0.0951	1.66671	0.1095	0.1102	0.11	0.1029	0.1042	0.1035	0.1044	0.104	0.1037	0.0952	0.0953	0.0951	1.66671	0.1075	0.1082	0.1047	0.1051	0.1065	0.1048	0.1055	0.1057	0.1064	0.0949
1.83337	0.1109	0.1099	0.1093	0.1054	0.1086	0.1068	0.1047	0.1048	0.1047	0.0951	0.0951	0.0954	1.83338	0.1109	0.1127	0.1136	0.1093	0.1109	0.1103	0.1053	0.1062	0.1066	0.1	0.0956	0.0951	1.83338	0.1109	0.1115	0.1116	0.1036	0.1049	0.1043	0.1054	0.1049	0.1046	0.0952	0.0954	0.0951	1.83338	0.1084	0.1098	0.1058	0.1061	0.1071	0.1056	0.1064	0.1062	0.1072	0.095
2.00003	0.1117	0.111	0.1101	0.106	0.109	0.1074	0.1052	0.1053	0.1054	0.0951	0.0952	0.0954	2.00005	0.1121	0.114	0.1145	0.1102	0.1118	0.1113	0.1061	0.1069	0.1074	0.1003	0.0957	0.0952	2.00005	0.1119	0.1131	0.1125	0.1046	0.1058	0.1051	0.1063	0.1057	0.1054	0.0952	0.0953	0.0951	2.00005	0.1105	0.1116	0.1066	0.107	0.1084	0.1065	0.1073	0.1072	0.1081	0.095
2.1667	0.1126	0.112	0.1112	0.107	0.1097	0.1081	0.1058	0.1056	0.1056	0.0951	0.0951	0.0955	2.16672	0.1131	0.1155	0.1158	0.1114	0.113	0.1123	0.1069	0.1079	0.108	0.1018	0.0957	0.0951	2.16672	0.1132	0.1141	0.1135	0.1055	0.1067	0.106	0.1076	0.1067	0.1063	0.0951	0.0953	0.0951	2.16672	0.1119	0.1132	0.1079	0.1081	0.1094	0.1077	0.1085	0.1084	0.1093	0.0951
2.33337	0.1145	0.1133	0.1121	0.1078	0.1105	0.1087	0.1066	0.1063	0.1063	0.0952	0.0953	0.0954	2.33339	0.1146	0.1167	0.1169	0.1126	0.114	0.1135	0.1078	0.1084	0.1086	0.1022	0.0957	0.0952	2.33339	0.1147	0.1159	0.1151	0.1064	0.1077	0.1071	0.109	0.108	0.1075	0.0951	0.0954	0.0952	2.3334	0.1145	0.1162	0.1091	0.1097	0.1109	0.1094	0.1098	0.1095	0.1105	0.095
2.50004	0.1153	0.1142	0.1136	0.1088	0.1113	0.1095	0.1074	0.1069	0.1069	0.0952	0.0953	0.0955	2.50007	0.1159	0.1183	0.1184	0.1138	0.1153	0.1144	0.1086	0.1093	0.1097	0.1023	0.0955	0.0951	2.50006	0.1157	0.1173	0.1166	0.1077	0.1088	0.1082	0.1106	0.1093	0.109	0.0951	0.0953	0.0952	2.50007	0.1178	0.1191	0.1106	0.1117	0.113	0.1111	0.1115	0.1113	0.1123	0.095
2.66671	0.1177	0.1154	0.1149	0.1093	0.1124	0.1104	0.1077	0.1075	0.1074	0.0951	0.0951	0.0954	2.66674	0.1172	0.1198	0.1199	0.1151	0.1163	0.1156	0.1097	0.1105	0.1106	0.1022	0.0958	0.0951	2.66673	0.1172	0.1183	0.1181	0.109	0.1104	0.1096	0.1125	0.1112	0.1108	0.0951	0.0953	0.095	2.66674	0.122	0.1243	0.1132	0.1141	0.1159	0.114	0.1139	0.114	0.1148	0.095
2.83338	0.1181	0.1173	0.1163	0.1105	0.1135	0.1113	0.1091	0.1085	0.1083	0.0953	0.0953	0.0955	2.83341	0.119	0.1215	0.1217	0.117	0.1174	0.117	0.1106	0.1115	0.1115	0.1023	0.0956	0.0952	2.8334	0.1188	0.12	0.1199	0.1107	0.1122	0.1114	0.115	0.1134	0.1131	0.095	0.0952	0.0951	2.83341	0.1282	0.1308	0.1159	0.1168	0.1187	0.1168	0.1161	0.1166	0.1171	0.095
3.00005	0.1198	0.1192	0.1181	0.1115	0.1143	0.1125	0.1097	0.1095	0.1089	0.0954	0.0953	0.0954	3.00008	0.1211	0.124	0.1238	0.1183	0.1187	0.1184	0.1116	0.1128	0.1129	0.1022	0.0958	0.0951	3.00007	0.121	0.1225	0.1214	0.113	0.1148	0.1135	0.1178	0.1156	0.1153	0.095	0.0952	0.095	3.00008	0.1366	0.1389	0.1197	0.1207	0.1232	0.121	0.1201	0.1206	0.1208	0.095
3.16672	0.1221	0.1221	0.1206	0.113	0.1157	0.114	0.1108	0.1107	0.1101	0.0952	0.0952	0.0954	3.16675	0.1237	0.1272	0.1269	0.1199	0.1206	0.1203	0.1131	0.1143	0.1145	0.1023	0.0957	0.0951	3.16675	0.1236	0.1247	0.1235	0.1153	0.1175	0.116	0.1213	0.119	0.1182	0.0952	0.0952	0.095	3.16675	0.1457	0.1494	0.1252	0.1263	0.1297	0.1268	0.1258	0.1264	0.1258	0.0951
3.33339	0.1244	0.1252	0.1233	0.1145	0.1176	0.116	0.1121	0.1121	0.1116	0.0952	0.0952	0.0955	3.33342	0.127	0.1304	0.1301	0.1223	0.1231	0.1229	0.1152	0.1165	0.1168	0.102	0.0957	0.0952	3.33342	0.1264	0.1281	0.1266	0.1185	0.1207	0.1192	0.1255	0.123	0.1222	0.0952	0.0954	0.0951	3.33343	0.1554	0.1593	0.132	0.1322	0.1368	0.134	0.1336	0.1346	0.133	0.0951
3.50006	0.1289	0.1298	0.1275	0.1166	0.1203	0.1186	0.1144	0.1143	0.1138	0.0952	0.0954	0.0956	3.50009	0.1317	0.1357	0.1354	0.1247	0.126	0.1255	0.1175	0.1187	0.1193	0.1022	0.0957	0.0951	3.50009	0.1309	0.1331	0.1308	0.1229	0.1258	0.1237	0.1304	0.1275	0.1266	0.0951	0.0953	0.095	3.5001	0.1664	0.1711	0.1396	0.1397	0.1458	0.1421	0.1434	0.1449	0.1423	0.095
3.66673	0.1348	0.1366	0.1339	0.1194	0.1235	0.1218	0.1167	0.1168	0.1166	0.0953	0.0954	0.0955	3.66676	0.1381	0.143	0.1425	0.1283	0.1296	0.1293	0.1214	0.1225	0.123	0.1022	0.0958	0.0951	3.66676	0.1368	0.1398	0.1374	0.1286	0.1323	0.1296	0.1357	0.1329	0.1314	0.0951	0.0954	0.0951	3.66677	0.1794	0.1852	0.1489	0.1473	0.1542	0.1505	0.1509	0.1529	0.1495	0.0951
3.8334	0.1411	0.144	0.1412	0.1231	0.1283	0.1265	0.1203	0.1205	0.1199	0.0953	0.0954	0.0956	3.83343	0.1449	0.1501	0.1502	0.1337	0.1344	0.1346	0.1265	0.1279	0.1284	0.1021	0.0956	0.0952	3.83343	0.143	0.1469	0.1449	0.1349	0.1391	0.1361	0.1427	0.1392	0.1374	0.0952	0.0953	0.0951	3.83344	0.1913	0.1983	0.1579	0.1559	0.163	0.158	0.1582	0.1594	0.1559	0.095
4.00007	0.1486	0.1534	0.1497	0.1281	0.1342	0.1325	0.1254	0.1259	0.1247	0.0954	0.0954	0.0955	4.0001	0.1542	0.1601	0.1606	0.1398	0.1418	0.1417	0.1325	0.1337	0.1342	0.1023	0.0957	0.0951	4.0001	0.1507	0.1553	0.1528	0.1411	0.1459	0.1428	0.1506	0.1466	0.1445	0.0951	0.0953	0.0951	4.00011	0.2037	0.2145	0.1691	0.1661	0.173	0.1673	0.1655	0.1685	0.1619	0.095
4.16674	0.1584	0.1647	0.1607	0.1336	0.1405	0.1385	0.1307	0.1313	0.1302	0.0955	0.0955	0.0956	4.16678	0.1643	0.1714	0.1723	0.1466	0.1501	0.1494	0.1388	0.1402	0.1405	0.1021	0.0957	0.0951	4.16678	0.1604	0.1663	0.164	0.1493	0.1544	0.1506	0.16	0.1559	0.1526	0.0951	0.0953	0.095	4.16678	0.2191	0.2329	0.1804	0.1769	0.1844	0.1772	0.1762	0.1793	0.1699	0.0951
4.33341	0.171	0.1783	0.1738	0.14	0.1486	0.1465	0.1367	0.1372	0.1362	0.0954	0.0954	0.0956	4.33345	0.1791	0.1871	0.1886	0.1553	0.1594	0.1585	0.1469	0.1483	0.1482	0.1022	0.0956	0.0952	4.33345	0.173	0.1794	0.1775	0.159	0.1644	0.1606	0.1711	0.1668	0.1625	0.0951	0.0953	0.0951	4.33345	0.233	0.2535	0.1906	0.1876	0.195	0.1868	0.1863	0.1957	0.1791	0.095
4.50008	0.1858	0.1949	0.1891	0.1481	0.1589	0.1562	0.1442	0.1448	0.1432	0.0954	0.0954	0.0956	4.50012	0.1943	0.2047	0.2071	0.1657	0.1724	0.1712	0.1572	0.1591	0.1584	0.1023	0.0957	0.0951	4.50012	0.1869	0.1954	0.1936	0.1695	0.1767	0.1718	0.1836	0.1794	0.174	0.0951	0.0954	0.0951	4.50012	0.2498	0.2797	0.2022	0.1969	0.2062	0.198	0.1994	0.2137	0.1903	0.095
4.66675	0.2034	0.2125	0.2062	0.1578	0.1708	0.1676	0.154	0.1547	0.1526	0.0955	0.0956	0.0956	4.66679	0.2126	0.2239	0.2255	0.1783	0.1871	0.1844	0.1694	0.1717	0.1704	0.1022	0.0957	0.0952	4.66679	0.2047	0.211	0.2116	0.1829	0.1896	0.1843	0.1994	0.1961	0.1876	0.0951	0.0952	0.095	4.66679	0.2704	0.3081	0.2132	0.2089	0.2182	0.2091	0.2152	0.2334	0.2019	0.095
4.83342	0.2235	0.2326	0.2254	0.1689	0.1844	0.1806	0.165	0.1666	0.1636	0.0954	0.0955	0.0957	4.83346	0.2326	0.2473	0.2458	0.1926	0.2032	0.2	0.1845	0.187	0.1841	0.1024	0.0957	0.0951	4.83346	0.2234	0.229	0.2315	0.1962	0.2029	0.1968	0.2151	0.2127	0.2023	0.0951	0.0953	0.0951	4.83347	0.2932	0.3339	0.2288	0.2233	0.2309	0.2199	0.2317	0.2524	0.2172	0.095
5.00009	0.2455	0.257	0.2473	0.1818	0.2003	0.1954	0.1774	0.1802	0.1763	0.0955	0.0955	0.0956	5.00014	0.2585	0.2781	0.2685	0.2109	0.2234	0.2191	0.2001	0.2042	0.2003	0.1024	0.0957	0.0952	5.00013	0.2432	0.2529	0.2494	0.2098	0.2181	0.2089	0.2334	0.2303	0.2163	0.0952	0.0953	0.0951	5.00014	0.3207	0.3631	0.2392	0.2372	0.246	0.2319	0.2492	0.2724	0.2303	0.095
5.16675	0.2718	0.2921	0.2726	0.1964	0.2176	0.2113	0.1924	0.1961	0.1904	0.0954	0.0954	0.0957	5.16681	0.2863	0.3169	0.3034	0.2293	0.2428	0.238	0.2178	0.223	0.2176	0.1025	0.0957	0.0952	5.1668	0.2719	0.2874	0.2765	0.2276	0.2349	0.2254	0.2544	0.2484	0.2337	0.0951	0.0953	0.0951	5.16681	0.3485	0.3979	0.2588	0.2545	0.2609	0.2457	0.2639	0.2958	0.244	0.095
5.33342	0.307	0.324	0.3072	0.2128	0.2357	0.2274	0.2079	0.2144	0.2065	0.0954	0.0954	0.0956	5.33348	0.3225	0.3602	0.3391	0.2551	0.2644	0.259	0.2352	0.2409	0.235	0.1031	0.0957	0.0952	5.33347	0.3083	0.3258	0.3123	0.246	0.2494	0.2405	0.2752	0.2673	0.2508	0.0951	0.0953	0.0952	5.33348	0.3788	0.4341	0.2799	0.2734	0.2789	0.2622	0.2812	0.3171	0.2594	0.0949
5.50009	0.3459	0.3631	0.3474	0.2347	0.2548	0.2463	0.2258	0.234	0.2234	0.0954	0.0955	0.0956	5.50015	0.3642	0.4025	0.3836	0.2804	0.2885	0.2821	0.2581	0.2602	0.2534	0.1029	0.0957	0.0951	5.50014	0.3427	0.3655	0.3499	0.2645	0.2705	0.2624	0.2949	0.2877	0.2703	0.095	0.0953	0.095	5.50015	0.4145	0.4787	0.3084	0.2979	0.301	0.2824	0.3001	0.34	0.2781	0.0951
5.66676	0.3825	0.4053	0.3886	0.2536	0.2788	0.2678	0.244	0.2526	0.2403	0.0954	0.0955	0.0957	5.66682	0.3966	0.4438	0.424	0.3085	0.3173	0.3089	0.2788	0.2809	0.272	0.103	0.0958	0.0951	5.66681	0.3848	0.4096	0.3896	0.2867	0.288	0.2793	0.3174	0.3063	0.2885	0.0952	0.0953	0.095	5.66682	0.4547	0.5231	0.3422	0.3309	0.3294	0.3057	0.3235	0.3698	0.2971	0.095
5.83343	0.4224	0.4517	0.4274	0.2841	0.3051	0.2939	0.2673	0.2753	0.2592	0.0954	0.0954	0.0956	5.83349	0.4258	0.4873	0.4592	0.3416	0.3494	0.3383	0.2986	0.3007	0.2905	0.1033	0.0957	0.0951	5.83349	0.4322	0.4648	0.4313	0.3112	0.3183	0.3022	0.3383	0.3302	0.3093	0.0951	0.0952	0.0951	5.83349	0.4963	0.5732	0.3801	0.3567	0.3729	0.3382	0.3484	0.3991	0.319	0.095
6.0001	0.4538	0.4989	0.4711	0.3165	0.3356	0.3233	0.2889	0.2978	0.2799	0.0955	0.0955	0.0957	6.00016	0.454	0.5359	0.4939	0.3828	0.3801	0.3717	0.321	0.3226	0.3106	0.1033	0.0956	0.0951	6.00015	0.4644	0.5185	0.4707	0.336	0.3508	0.3345	0.3582	0.3523	0.3352	0.0951	0.0953	0.0951	6.00016	0.5404	0.6208	0.4224	0.3934	0.4141	0.3761	0.3931	0.4384	0.3473	0.095
6.16677	0.4877	0.5424	0.505	0.3536	0.3681	0.3527	0.3155	0.3177	0.2979	0.0954	0.0955	0.0956	6.16683	0.4796	0.5757	0.5284	0.4146	0.4193	0.4095	0.3445	0.3477	0.339	0.1026	0.0956	0.0951	6.16683	0.4968	0.5808	0.5047	0.3687	0.3848	0.3672	0.3755	0.3794	0.3595	0.0951	0.0954	0.0952	6.16684	0.5855	0.6801	0.4694	0.4304	0.4631	0.4165	0.4409	0.4876	0.3879	0.095
6.33344	0.5161	0.5892	0.5385	0.3871	0.4036	0.3886	0.3442	0.3396	0.3201	0.0954	0.0955	0.0957	6.3335	0.5096	0.6149	0.5622	0.4463	0.4584	0.4442	0.3835	0.3816	0.3663	0.1026	0.0957	0.0952	6.3335	0.5315	0.6332	0.5568	0.4039	0.424	0.4001	0.4072	0.4018	0.3824	0.0951	0.0954	0.0951	6.33351	0.6387	0.7482	0.5235	0.4685	0.5165	0.4723	0.4906	0.5437	0.4328	0.0949
6.50011	0.5482	0.6397	0.5786	0.4228	0.4433	0.4299	0.3743	0.3692	0.3459	0.0954	0.0955	0.0956	6.50017	0.5449	0.6707	0.6084	0.481	0.4982	0.4841	0.426	0.424	0.403	0.1032	0.0957	0.0951	6.50017	0.5633	0.6828	0.5981	0.4313	0.4553	0.4265	0.4398	0.4274	0.405	0.0951	0.0953	0.095	6.50018	0.7079	0.829	0.578	0.5125	0.5725	0.5274	0.533	0.5995	0.4865	0.095
6.66678	0.5888	0.6895	0.6213	0.4534	0.4904	0.4733	0.4102	0.4046	0.3763	0.0954	0.0954	0.0957	6.66684	0.5821	0.7165	0.6397	0.5122	0.5239	0.511	0.478	0.4796	0.4468	0.104	0.0957	0.0952	6.66684	0.6032	0.7386	0.6441	0.4614	0.4949	0.4647	0.4766	0.4626	0.4382	0.0951	0.0954	0.0952	6.66685	0.7881	0.9063	0.6284	0.5621	0.6237	0.5817	0.5745	0.6577	0.5443	0.095
6.83345	0.6253	0.7395	0.6664	0.4863	0.5402	0.5162	0.4591	0.4513	0.4198	0.0955	0.0955	0.0957	6.83351	0.623	0.7729	0.6938	0.5455	0.5678	0.56	0.5319	0.5358	0.4988	0.1042	0.0957	0.095	6.83351	0.6485	0.7994	0.6974	0.491	0.5324	0.5044	0.5114	0.5075	0.4787	0.095	0.0953	0.0951	6.83352	0.8689	0.9903	0.7001	0.6191	0.6852	0.6378	0.6264	0.717	0.6044	0.095
7.00012	0.6665	0.7906	0.7137	0.5205	0.5939	0.5622	0.5134	0.5022	0.464	0.0955	0.0956	0.0956	7.00019	0.6606	0.8364	0.7378	0.5804	0.6082	0.6018	0.5784	0.5848	0.5476	0.104	0.0958	0.0952	7.00018	0.6907	0.8519	0.7425	0.5235	0.5747	0.5351	0.5484	0.5581	0.5301	0.0952	0.0953	0.0951	7.00019	0.9575	1.0683	0.7691	0.6873	0.7543	0.7011	0.696	0.7875	0.669	0.095
7.16679	0.7062	0.8392	0.7562	0.5585	0.6506	0.6165	0.5623	0.5567	0.5173	0.0955	0.0955	0.0957	7.16686	0.7038	0.9027	0.788	0.618	0.6535	0.6498	0.6227	0.6353	0.5978	0.104	0.0957	0.0951	7.16685	0.7405	0.9195	0.8125	0.5562	0.6174	0.5838	0.5808	0.603	0.5807	0.0952	0.0953	0.0951	7.16686	1.0448	1.1585	0.8512	0.7593	0.8296	0.771	0.7777	0.8616	0.7393	0.095
7.33345	0.7591	0.9012	0.8167	0.5999	0.7095	0.6724	0.6093	0.6104	0.5696	0.0956	0.0956	0.0958	7.33353	0.7552	0.9662	0.8483	0.6562	0.7005	0.7017	0.6646	0.6859	0.6529	0.1043	0.0957	0.0951	7.33353	0.794	0.9828	0.8699	0.5966	0.6667	0.6303	0.6147	0.643	0.6294	0.0951	0.0952	0.095	7.33353	1.1258	1.2323	0.9299	0.8409	0.9037	0.8408	0.8616	0.9373	0.819	0.095
7.50013	0.8177	0.964	0.8826	0.6413	0.7648	0.7282	0.6546	0.665	0.6223	0.0955	0.0955	0.0956	7.5002	0.8105	1.0273	0.9071	0.6962	0.7551	0.7529	0.7044	0.7366	0.7077	0.1041	0.0957	0.0952	7.5002	0.8505	1.0476	0.9396	0.6376	0.7128	0.6773	0.6584	0.6957	0.6799	0.095	0.0953	0.095	7.5002	1.1927	1.2959	1.0158	0.9289	0.989	0.9228	0.9504	1.0169	0.9025	0.095
7.66679	0.8939	1.0419	0.9603	0.6918	0.8325	0.7936	0.6904	0.7228	0.6796	0.0955	0.0955	0.0957	7.66687	0.885	1.0872	0.978	0.7455	0.817	0.8143	0.7497	0.8012	0.7718	0.1044	0.0957	0.095	7.66687	0.9085	1.1059	1.0058	0.6861	0.7564	0.7231	0.7053	0.7516	0.7343	0.0952	0.0953	0.095	7.66688	1.2476	1.3435	1.0976	1.0165	1.077	1.0068	1.0347	1.1028	0.9889	0.0949
7.83346	0.9764	1.1173	1.0418	0.7458	0.9026	0.8597	0.7305	0.777	0.7402	0.0955	0.0956	0.0957	7.83354	0.9643	1.1484	1.0562	0.8012	0.8887	0.8808	0.8078	0.8715	0.8507	0.1054	0.0957	0.0952	7.83354	0.9774	1.1714	1.0723	0.738	0.804	0.7727	0.7652	0.7993	0.7883	0.0951	0.0954	0.095	7.83354	1.2956	1.3846	1.172	1.0972	1.1612	1.0943	1.1126	1.1823	1.0771	0.0949
8.00013	1.0544	1.1871	1.1233	0.809	0.97	0.9279	0.7863	0.844	0.8117	0.0955	0.0955	0.0957	8.00021	1.0499	1.2114	1.1328	0.869	0.9538	0.9463	0.878	0.9431	0.9289	0.1052	0.096	0.0951	8.00022	1.0505	1.2468	1.1519	0.7889	0.8574	0.825	0.8281	0.8487	0.8499	0.0951	0.0953	0.0951	8.00022	1.3377	1.4206	1.2371	1.1649	1.233	1.1711	1.1824	1.2569	1.1549	0.095
8.1668	1.1348	1.2617	1.2092	0.8807	1.0397	0.9971	0.8533	0.9128	0.8821	0.0955	0.0955	0.0957	8.16688	1.1314	1.2818	1.2198	0.9378	1.0219	1.0136	0.9567	1.0166	1.0017	0.1053	0.0957	0.0951	8.16689	1.1342	1.3091	1.2217	0.8433	0.9087	0.877	0.8927	0.9064	0.9075	0.0951	0.0954	0.0951	8.16689	1.3726	1.4494	1.2926	1.2215	1.2897	1.2334	1.2411	1.3211	1.2211	0.095
8.33347	1.2117	1.3248	1.2751	0.9592	1.1051	1.0642	0.9315	0.983	0.955	0.0954	0.0954	0.0956	8.33356	1.2096	1.3471	1.2852	1.0126	1.0997	1.0834	1.0363	1.0879	1.0726	0.1059	0.0958	0.0952	8.33356	1.204	1.3515	1.2735	0.8931	0.9651	0.9328	0.9542	0.9647	0.9659	0.0952	0.0952	0.0951	8.33356	1.4017	1.4753	1.3432	1.2699	1.3387	1.2864	1.2887	1.372	1.2763	0.0949
8.50014	1.2726	1.3755	1.3288	1.0407	1.1763	1.1406	0.9994	1.0529	1.0297	0.0956	0.0955	0.0957	8.50023	1.2653	1.3933	1.335	1.0859	1.1766	1.1622	1.1084	1.153	1.1432	0.1059	0.0956	0.0951	8.50023	1.2547	1.3879	1.3131	0.9496	1.0206	0.9926	1.0204	1.0369	1.0269	0.0951	0.0954	0.0951	8.50023	1.429	1.4928	1.3826	1.3135	1.3782	1.3306	1.3282	1.4131	1.3219	0.0951
8.66681	1.3166	1.4117	1.3691	1.1185	1.2444	1.2159	1.0655	1.1184	1.0981	0.0955	0.0955	0.0957	8.6669	1.3101	1.4308	1.3796	1.1611	1.2534	1.2413	1.1742	1.2186	1.2114	0.1057	0.0956	0.0951	8.6669	1.2988	1.4165	1.3454	1.0102	1.0784	1.0509	1.0891	1.1051	1.0949	0.0951	0.0953	0.095	8.6669	1.4486	1.5063	1.417	1.3489	1.4104	1.366	1.3582	1.4464	1.3595	0.095
8.83348	1.3546	1.4457	1.4087	1.1907	1.3093	1.2856	1.1329	1.1831	1.165	0.0954	0.0955	0.0956	8.83357	1.347	1.4616	1.4121	1.2284	1.3169	1.3031	1.2347	1.2802	1.2767	0.1059	0.0958	0.0951	8.83357	1.3378	1.4493	1.3826	1.0726	1.1389	1.1168	1.1506	1.1674	1.1601	0.0952	0.0953	0.0952	8.83357	1.4679	1.5224	1.4464	1.3807	1.4449	1.3972	1.385	1.4725	1.3895	0.095
9.00015	1.389	1.4748	1.4391	1.247	1.3601	1.3334	1.1979	1.2466	1.2285	0.0955	0.0955	0.0957	9.00024	1.3799	1.4864	1.4437	1.2813	1.3624	1.3496	1.2955	1.3359	1.332	0.1063	0.0957	0.0951	9.00025	1.3765	1.4788	1.4165	1.1399	1.2003	1.1788	1.2069	1.2238	1.2182	0.0951	0.0953	0.0951	9.00024	1.4852	1.5343	1.4689	1.4093	1.4726	1.4274	1.4101	1.4946	1.4151	0.095
9.1671	1.4206	1.5023	1.4718	1.2888	1.3967	1.3738	1.2637	1.3076	1.2897	0.0955	0.0956	0.0957	9.16691	1.4138	1.5114	1.4739	1.3268	1.4001	1.3875	1.3468	1.3791	1.3775	0.1065	0.0957	0.0952	9.16692	1.4089	1.5054	1.4452	1.2044	1.2545	1.2387	1.257	1.2723	1.2685	0.0953	0.0953	0.0952	9.16691	1.4985	1.5489	1.4916	1.4289	1.4981	1.4542	1.4298	1.5133	1.436	0.095
9.33377	1.4511	1.5294	1.4994	1.3276	1.43	1.4058	1.3165	1.356	1.3423	0.0955	0.0955	0.0957	9.33358	1.4383	1.5315	1.4993	1.3611	1.4315	1.4213	1.3875	1.4136	1.4145	0.1065	0.0957	0.0952	9.33359	1.4378	1.528	1.4708	1.2594	1.3053	1.2941	1.2983	1.3136	1.3122	0.0951	0.0954	0.0951	9.33358	1.5151	1.5634	1.5063	1.4487	1.5181	1.4743	1.4477	1.5278	1.4568	0.0951
9.50044	1.4802	1.5545	1.5285	1.3642	1.461	1.4397	1.3555	1.3919	1.3847	0.0956	0.0956	0.0957	9.50025	1.4636	1.5543	1.5189	1.3936	1.463	1.4478	1.4188	1.4441	1.4419	0.1057	0.0956	0.0951	9.50026	1.4634	1.5489	1.4962	1.3021	1.3501	1.3362	1.339	1.3499	1.3498	0.0951	0.0953	0.0951	9.50026	1.5358	1.5801	1.5224	1.4663	1.5351	1.4943	1.4639	1.5432	1.474	0.0951
9.6671	1.5044	1.5752	1.5532	1.3952	1.4865	1.4673	1.3909	1.4227	1.4157	0.0955	0.0956	0.0958	9.66693	1.4888	1.5771	1.544	1.4243	1.4916	1.4768	1.4453	1.4686	1.4688	0.1061	0.0957	0.0951	9.66693	1.4906	1.5714	1.5189	1.3401	1.3924	1.373	1.3765	1.3879	1.383	0.095	0.0953	0.0951	9.66692	1.5537	1.5955	1.5389	1.4818	1.549	1.5138	1.4778	1.557	1.4906	0.0951
9.83377	1.5274	1.5959	1.5742	1.4238	1.5109	1.4912	1.4208	1.451	1.4448	0.0954	0.0955	0.0956	9.8336	1.5117	1.5959	1.5699	1.4513	1.5168	1.5052	1.4695	1.4919	1.492	0.106	0.0958	0.095	9.8336	1.5103	1.5922	1.5416	1.3674	1.4244	1.4009	1.4068	1.4188	1.4162	0.0951	0.0953	0.0951	9.8336	1.5669	1.6046	1.555	1.4997	1.5652	1.5316	1.4919	1.568	1.5051	0.095
10.0004	1.5519	1.615	1.5978	1.4522	1.533	1.5147	1.4486	1.4765	1.4712	0.0956	0.0956	0.0957	10.0003	1.5365	1.6146	1.5911	1.4769	1.5378	1.5253	1.4926	1.5123	1.5124	0.1063	0.0956	0.0952	10.0003	1.5339	1.6169	1.5648	1.3993	1.449	1.4274	1.4345	1.4459	1.4441	0.0951	0.0952	0.095	10.0003	1.5779	1.6131	1.5741	1.5166	1.5807	1.5492	1.5041	1.5761	1.5189	0.095
10.1671	1.5737	1.6381	1.6267	1.478	1.5569	1.5395	1.4739	1.499	1.4953	0.0954	0.0954	0.0956	10.1669	1.5591	1.6327	1.6199	1.4978	1.5564	1.5479	1.5113	1.5314	1.533	0.106	0.0958	0.0951	10.1669	1.5573	1.6436	1.5955	1.4236	1.4726	1.4533	1.4564	1.4673	1.4687	0.0951	0.0953	0.0951	10.1669	1.5909	1.6192	1.5862	1.5342	1.5885	1.5649	1.5219	1.5931	1.537	0.095
10.3338	1.5946	1.6586	1.6513	1.5016	1.5771	1.5605	1.4965	1.5223	1.518	0.0955	0.0955	0.0956	10.3336	1.5833	1.6533	1.6384	1.5185	1.5756	1.5663	1.5285	1.5478	1.5525	0.1058	0.0956	0.0952	10.3336	1.5821	1.6671	1.6165	1.4483	1.4937	1.4754	1.4799	1.4888	1.4883	0.0951	0.0953	0.0952	10.3336	1.5969	1.6277	1.6003	1.5425	1.5959	1.5763	1.5393	1.6073	1.5526	0.095
10.5005	1.6149	1.6757	1.6704	1.5269	1.5942	1.5823	1.5176	1.5388	1.5369	0.0955	0.0956	0.0957	10.5003	1.6029	1.6709	1.6577	1.538	1.5985	1.5905	1.5459	1.563	1.5668	0.1061	0.0957	0.0951	10.5003	1.6065	1.6829	1.6352	1.4729	1.5144	1.4973	1.5011	1.5087	1.509	0.0951	0.0953	0.0951	10.5003	1.6075	1.6363	1.61	1.5554	1.6068	1.5849	1.5564	1.6204	1.5672	0.095
10.6671	1.635	1.6929	1.6808	1.5546	1.6161	1.6052	1.5375	1.5553	1.5562	0.0955	0.0956	0.0957	10.667	1.6224	1.6875	1.673	1.5631	1.6222	1.613	1.5632	1.5794	1.5836	0.1057	0.0958	0.0951	10.667	1.6292	1.6924	1.6452	1.4963	1.5317	1.5181	1.5202	1.5266	1.5273	0.0952	0.0954	0.0951	10.667	1.6178	1.6457	1.6185	1.5649	1.6147	1.5951	1.5669	1.6241	1.5791	0.0951
10.8338	1.6513	1.7025	1.69	1.5795	1.6358	1.6251	1.5549	1.573	1.5753	0.0955	0.0955	0.0956	10.8336	1.6381	1.701	1.683	1.5837	1.6368	1.6292	1.5755	1.5946	1.6039	0.1048	0.0957	0.0952	10.8336	1.6405	1.7041	1.6579	1.5162	1.5515	1.5378	1.5392	1.5442	1.5461	0.0951	0.0955	0.0951	10.8336	1.6293	1.6526	1.6277	1.5748	1.6239	1.6042	1.5761	1.6288	1.5866	0.0951
11.0005	1.6603	1.7113	1.7013	1.597	1.6514	1.6417	1.5724	1.5885	1.5927	0.0954	0.0954	0.0957	11.0003	1.6506	1.7099	1.6938	1.6043	1.6504	1.6422	1.5924	1.6113	1.6166	0.1049	0.0957	0.0951	11.0003	1.6517	1.7093	1.6645	1.5386	1.5666	1.5604	1.5543	1.5553	1.5599	0.0952	0.0953	0.095	11.0003	1.6362	1.656	1.6377	1.5823	1.6314	1.6131	1.5816	1.6329	1.5943	0.0949
11.1671	1.6699	1.7192	1.7063	1.6158	1.6611	1.6546	1.5915	1.6073	1.6115	0.0953	0.0955	0.0957	11.167	1.6607	1.7207	1.7049	1.6186	1.6624	1.6562	1.6087	1.6246	1.6307	0.1048	0.0957	0.0951	11.167	1.6647	1.7182	1.676	1.5627	1.5832	1.5826	1.5673	1.5682	1.5729	0.0952	0.0953	0.095	11.167	1.6454	1.6606	1.6482	1.5927	1.6426	1.6236	1.5902	1.6346	1.6037	0.0951
11.3338	1.6768	1.7259	1.7177	1.6309	1.6778	1.669	1.6085	1.6228	1.6294	0.0955	0.0956	0.0957	11.3336	1.6669	1.7277	1.7097	1.6314	1.674	1.6663	1.6231	1.6348	1.6394	0.1053	0.0957	0.0952	11.3336	1.6672	1.7243	1.6857	1.5797	1.5979	1.6017	1.578	1.5795	1.5882	0.0951	0.0953	0.0951	11.3336	1.6517	1.6654	1.6548	1.6017	1.6505	1.6307	1.6009	1.6412	1.6098	0.0949
11.5005	1.6855	1.7344	1.7239	1.6451	1.6875	1.6759	1.6262	1.6356	1.6402	0.0955	0.0955	0.0957	11.5003	1.6718	1.7357	1.7159	1.6456	1.6854	1.6751	1.6315	1.6407	1.6485	0.1051	0.0957	0.0952	11.5003	1.6787	1.7312	1.7007	1.5987	1.6194	1.6169	1.5945	1.5969	1.6034	0.0951	0.0953	0.0951	11.5003	1.6573	1.6714	1.6625	1.6097	1.6588	1.6385	1.6071	1.6463	1.6177	0.095
11.6671	1.6905	1.7399	1.7283	1.6546	1.695	1.6833	1.6385	1.6466	1.6531	0.0955	0.0956	0.0956	11.667	1.6745	1.7444	1.7176	1.657	1.695	1.6821	1.6418	1.6482	1.6592	0.1051	0.0957	0.0951	11.667	1.6856	1.7375	1.7067	1.612	1.6319	1.6286	1.607	1.6117	1.6172	0.0951	0.0953	0.0951	11.667	1.6634	1.6716	1.6676	1.6181	1.6637	1.6452	1.6143	1.6505	1.623	0.0951
11.8338	1.6992	1.7466	1.7323	1.6638	1.7003	1.6889	1.6502	1.659	1.6662	0.0954	0.0955	0.0958	11.8337	1.6785	1.7449	1.7226	1.6627	1.7023	1.6896	1.6498	1.6588	1.6661	0.1053	0.0957	0.0952	11.8337	1.6926	1.7414	1.7105	1.6242	1.6393	1.6412	1.6106	1.6246	1.6265	0.0951	0.0953	0.0951	11.8337	1.6668	1.6753	1.6722	1.6231	1.6692	1.6498	1.6203	1.6553	1.6312	0.095
12.0005	1.7036	1.7498	1.7424	1.6733	1.7087	1.6962	1.6639	1.668	1.6725	0.0954	0.0955	0.0956	12.0003	1.6777	1.7526	1.727	1.6703	1.7077	1.6984	1.6598	1.6666	1.6714	0.1053	0.0957	0.0951	12.0003	1.6999	1.7467	1.7193	1.6354	1.6462	1.6537	1.6192	1.634	1.6355	0.0951	0.0953	0.0951	12.0003	1.6737	1.6798	1.6804	1.6301	1.6758	1.6557	1.628	1.6611	1.638	0.095
12.1671	1.7089	1.7511	1.7465	1.6788	1.7127	1.703	1.6698	1.6719	1.6795	0.0955	0.0956	0.0958	12.167	1.6824	1.7442	1.7299	1.679	1.7097	1.7038	1.6687	1.6714	1.6788	0.1052	0.0957	0.0951	12.167	1.7056	1.7534	1.7275	1.6449	1.6616	1.6636	1.6344	1.6417	1.645	0.0951	0.0953	0.0952	12.167	1.6783	1.6827	1.6836	1.6359	1.6801	1.6617	1.6374	1.6679	1.648	0.0951
12.3338	1.7088	1.7591	1.7475	1.685	1.7216	1.7104	1.677	1.6789	1.6845	0.0954	0.0955	0.0957	12.3337	1.6978	1.7492	1.728	1.685	1.7179	1.7057	1.6763	1.6762	1.6814	0.1049	0.0957	0.0951	12.3337	1.71	1.7585	1.7368	1.6484	1.6793	1.6699	1.6447	1.6488	1.6515	0.0951	0.0954	0.0951	12.3337	1.6809	1.6825	1.689	1.638	1.6829	1.6668	1.6438	1.6726	1.654	0.095
12.5005	1.7115	1.7562	1.7531	1.6897	1.725	1.7174	1.6846	1.6835	1.6884	0.0955	0.0956	0.0957	12.5003	1.7013	1.7564	1.7326	1.6913	1.7184	1.7134	1.6819	1.6851	1.6875	0.105	0.0957	0.0951	12.5003	1.7157	1.7566	1.7358	1.6566	1.684	1.678	1.6592	1.6599	1.6584	0.0953	0.0955	0.0951	12.5003	1.6873	1.6829	1.691	1.644	1.6866	1.6677	1.6499	1.678	1.66	0.095
12.6672	1.71	1.7645	1.7528	1.6942	1.7296	1.7255	1.6942	1.6906	1.6937	0.0955	0.0955	0.0956	12.667	1.705	1.7545	1.7414	1.6878	1.7152	1.7164	1.6865	1.6917	1.6943	0.1048	0.0958	0.0951	12.667	1.7134	1.7587	1.7408	1.6603	1.6876	1.6832	1.6666	1.6639	1.6667	0.0951	0.0954	0.0951	12.667	1.6918	1.6879	1.7013	1.6493	1.6914	1.6774	1.6552	1.6791	1.6643	0.0951
12.8338	1.7135	1.7636	1.7576	1.6993	1.7358	1.7264	1.7003	1.6982	1.6986	0.0955	0.0956	0.0956	12.8337	1.7061	1.7567	1.7451	1.6907	1.7183	1.7245	1.6861	1.6873	1.6996	0.1045	0.0957	0.0952	12.8337	1.7172	1.7641	1.7361	1.6539	1.6916	1.6809	1.6721	1.6701	1.6721	0.0952	0.0953	0.0951	12.8337	1.6945	1.6902	1.7046	1.6518	1.6942	1.6831	1.661	1.6838	1.6699	0.095
13.0005	1.7158	1.7601	1.7587	1.701	1.7391	1.7332	1.7065	1.7062	1.7022	0.0955	0.0955	0.0956	13.0004	1.7121	1.7632	1.7524	1.6974	1.7304	1.7171	1.6828	1.6851	1.7036	0.1047	0.0958	0.0952	13.0003	1.7209	1.7724	1.7353	1.6652	1.7017	1.6971	1.6793	1.6758	1.6801	0.0952	0.0954	0.0951	13.0003	1.6978	1.692	1.7051	1.655	1.6984	1.6828	1.6652	1.6868	1.6734	0.095
13.1672	1.7219	1.7609	1.7611	1.7068	1.7422	1.7322	1.7138	1.7092	1.7077	0.0954	0.0956	0.0956	13.167	1.7165	1.765	1.7562	1.7008	1.7386	1.7183	1.6921	1.6964	1.6961	0.1046	0.0958	0.0951	13.167	1.724	1.7777	1.7475	1.6705	1.706	1.6969	1.6861	1.6804	1.6847	0.0951	0.0953	0.0951	13.167	1.7006	1.6931	1.7095	1.6583	1.7007	1.6867	1.6713	1.6883	1.676	0.095
13.3338	1.7312	1.7658	1.7619	1.7095	1.751	1.7388	1.715	1.714	1.7162	0.0955	0.0956	0.0957	13.3337	1.7252	1.7698	1.7616	1.7052	1.7444	1.7261	1.7014	1.7019	1.7008	0.1047	0.0958	0.0951	13.3337	1.7278	1.7745	1.7408	1.6771	1.7088	1.6989	1.6915	1.6856	1.6891	0.0952	0.0954	0.0952	13.3337	1.7042	1.695	1.7163	1.6614	1.7043	1.6911	1.6764	1.6925	1.6801	0.095
13.5005	1.7308	1.7754	1.7711	1.7006	1.7527	1.7437	1.7209	1.7204	1.7246	0.0954	0.0955	0.0957	13.5004	1.7279	1.7696	1.7568	1.7066	1.7729	1.7357	1.7046	1.7052	1.6977	0.105	0.0957	0.0951	13.5004	1.7368	1.7798	1.7529	1.6805	1.7155	1.7055	1.6967	1.6923	1.6955	0.0951	0.0954	0.0952	13.5004	1.7045	1.6941	1.7182	1.6614	1.7072	1.6934	1.679	1.6936	1.6834	0.095
13.6672	1.7394	1.7813	1.7701	1.7101	1.7506	1.7453	1.7258	1.7242	1.7285	0.0954	0.0955	0.0957	13.667	1.7348	1.7717	1.771	1.7126	1.7377	1.7334	1.7066	1.7039	1.7102	0.1051	0.0958	0.0953	13.667	1.7393	1.7822	1.7488	1.6826	1.7164	1.7062	1.7002	1.6965	1.7009	0.0951	0.0954	0.0952	13.667	1.7073	1.6974	1.7233	1.6644	1.7096	1.6981	1.6832	1.6958	1.6875	0.095
13.8338	1.7421	1.7811	1.761	1.7139	1.7427	1.7509	1.7288	1.7281	1.7306	0.0954	0.0954	0.0957	13.8337	1.7335	1.7699	1.7805	1.7213	1.7458	1.7355	1.7088	1.7094	1.7123	0.1052	0.0958	0.0952	13.8337	1.7469	1.785	1.7603	1.6838	1.721	1.713	1.7073	1.7017	1.7079	0.0951	0.0954	0.0951	13.8337	1.7103	1.6968	1.7277	1.6671	1.7118	1.6979	1.6882	1.6988	1.6914	0.095
14.0005	1.7521	1.7887	1.7639	1.7207	1.7498	1.7504	1.732	1.7284	1.7348	0.0955	0.0956	0.0957	14.0004	1.7456	1.7745	1.776	1.7211	1.749	1.7448	1.7337	1.7134	1.7136	0.1054	0.0957	0.095	14.0004	1.7509	1.7933	1.7728	1.6907	1.7266	1.7159	1.7103	1.7078	1.7135	0.0952	0.0954	0.0952	14.0004	1.7113	1.6975	1.7286	1.6678	1.7132	1.6992	1.6908	1.7009	1.694	0.095
14.1672	1.7623	1.7954	1.7711	1.7274	1.7575	1.7461	1.7332	1.7333	1.7407	0.0954	0.0957	0.0955	14.1671	1.7368	1.7781	1.7685	1.7207	1.7513	1.7458	1.7351	1.7154	1.7193	0.1056	0.0957	0.095	14.167	1.7488	1.8121	1.7717	1.6964	1.7286	1.7226	1.7136	1.7116	1.7202	0.0951	0.0954	0.0951	14.1671	1.7136	1.6965	1.7317	1.6692	1.7146	1.7009	1.6932	1.7019	1.6966	0.0951
14.3338	1.7503	1.8004	1.78	1.7286	1.7645	1.7477	1.7288	1.736	1.7474	0.0955	0.0956	0.0956	14.3337	1.7395	1.7817	1.7771	1.7255	1.7502	1.7516	1.7356	1.7159	1.7221	0.1054	0.0957	0.095	14.3337	1.7492	1.7997	1.7642	1.7023	1.7336	1.726	1.7169	1.7153	1.7239	0.0951	0.0954	0.0951	14.3337	1.7147	1.6965	1.7291	1.6705	1.7128	1.7013	1.6959	1.6978	1.7008	0.0951
14.5005	1.7545	1.8023	1.7887	1.7327	1.7662	1.7491	1.7332	1.7196	1.7405	0.0954	0.0956	0.0957	14.5004	1.7452	1.7949	1.7822	1.726	1.7496	1.7538	1.7386	1.7235	1.7238	0.1053	0.0959	0.0951	14.5004	1.7601	1.8195	1.776	1.7088	1.7337	1.7286	1.7218	1.7204	1.7276	0.0951	0.0954	0.0951	14.5004	1.7136	1.6972	1.7356	1.6701	1.7144	1.7033	1.6968	1.7008	1.7014	0.0951
14.6672	1.763	1.8044	1.7863	1.7362	1.7642	1.7483	1.7369	1.7341	1.735	0.0956	0.0955	0.0957	14.6671	1.7491	1.7856	1.786	1.7285	1.7508	1.7586	1.7406	1.7237	1.7292	0.1055	0.0959	0.0953	14.6671	1.7621	1.8021	1.806	1.7111	1.7399	1.7356	1.7236	1.7232	1.7326	0.0952	0.0954	0.0952	14.6671	1.7176	1.6984	1.7356	1.6733	1.715	1.7032	1.7012	1.7022	1.7025	0.095
14.8339	1.7711	1.8098	1.798	1.7378	1.7727	1.751	1.7434	1.7339	1.741	0.0955	0.0956	0.0957	14.8337	1.7518	1.7898	1.7903	1.7305	1.7582	1.7648	1.7404	1.7251	1.734	0.1052	0.0957	0.0951	14.8337	1.7553	1.804	1.788	1.7118	1.74	1.7393	1.7262	1.7267	1.7413	0.0951	0.0954	0.0952	14.8337	1.7178	1.7011	1.7392	1.6736	1.7174	1.7091	1.7023	1.7021	1.7047	0.095
15.0005	1.7812	1.809	1.7979	1.7385	1.7773	1.7604	1.7442	1.7427	1.7539	0.0954	0.0956	0.0956	15.0004	1.7517	1.7895	1.7945	1.7307	1.7565	1.7619	1.7433	1.7271	1.7361	0.105	0.0958	0.0951	15.0004	1.7568	1.813	1.7797	1.7166	1.7421	1.7386	1.7294	1.7306	1.7374	0.0951	0.0954	0.0951	15.0004	1.7171	1.7005	1.7423	1.6726	1.7178	1.7107	1.7032	1.7034	1.7081	0.095
15.1672	1.7734	1.8105	1.7982	1.7384	1.7802	1.7669	1.7444	1.7413	1.7562	0.0955	0.0955	0.0956	15.1671	1.7481	1.7932	1.7912	1.7347	1.7588	1.762	1.7429	1.7295	1.7366	0.1052	0.0958	0.0952	15.1671	1.7566	1.8032	1.7827	1.7167	1.7407	1.7426	1.7319	1.7311	1.7394	0.0952	0.0954	0.0953	15.1671	1.7163	1.6996	1.741	1.6713	1.7163	1.7094	1.7033	1.7005	1.7086	0.095
15.3339	1.7704	1.8131	1.8005	1.7362	1.7834	1.7717	1.7602	1.7455	1.7565	0.0955	0.0955	0.0956	15.3338	1.758	1.7938	1.7957	1.7371	1.7618	1.7669	1.7435	1.7315	1.7491	0.1049	0.0957	0.095	15.3337	1.7579	1.8065	1.7841	1.7221	1.7401	1.7441	1.7363	1.734	1.7436	0.0952	0.0954	0.0952	15.3337	1.7176	1.6986	1.7409	1.6729	1.7172	1.7092	1.7034	1.7042	1.7093	0.0951
15.5005	1.7739	1.8047	1.8052	1.7366	1.7857	1.7746	1.7608	1.7411	1.757	0.0955	0.0956	0.0957	15.5004	1.7593	1.7981	1.8014	1.7382	1.7626	1.7734	1.7444	1.7331	1.7931	0.1053	0.0958	0.0952	15.5004	1.7575	1.8098	1.7838	1.7192	1.7422	1.7564	1.7389	1.737	1.747	0.0951	0.0954	0.0951	15.5004	1.7163	1.6973	1.74	1.6719	1.7166	1.7076	1.7056	1.7084	1.7104	0.095
15.6672	1.7754	1.8045	1.8116	1.7419	1.7869	1.7784	1.754	1.744	1.7624	0.0956	0.0955	0.0956	15.6671	1.7618	1.7888	1.7952	1.7388	1.7633	1.7686	1.7434	1.7344	1.7505	0.1048	0.0958	0.0951	15.6671	1.7614	1.8083	1.7852	1.7178	1.7429	1.7508	1.7407	1.7416	1.7542	0.0951	0.0954	0.0952	15.6671	1.7155	1.6981	1.7417	1.6704	1.7183	1.7101	1.7065	1.7061	1.7103	0.095
15.8339	1.7772	1.8135	1.816	1.7432	1.7897	1.7763	1.7585	1.7451	1.7631	0.0954	0.0955	0.0955	15.8338	1.7632	1.795	1.8061	1.7419	1.7639	1.7777	1.7449	1.7362	1.7321	0.1051	0.0958	0.0951	15.834	1.7638	1.8096	1.7882	1.7206	1.7441	1.7482	1.7442	1.7446	1.756	0.0952	0.0954	0.0951	15.8338	1.7154	1.6977	1.7436	1.6708	1.718	1.7121	1.7054	1.7041	1.713	0.095
16.0005	1.8068	1.817	1.8175	1.7782	1.7902	1.78	1.7621	1.7455	1.7677	0.0955	0.0955	0.0956	16.0004	1.7654	1.7896	1.8003	1.7412	1.7686	1.8108	1.7451	1.7377	1.7486	0.1051	0.0958	0.0951	16.0007	1.7619	1.8101	1.7904	1.7193	1.745	1.7532	1.746	1.7441	1.7583	0.0953	0.0954	0.0951	16.0004	1.7148	1.6979	1.7439	1.6692	1.715	1.7118	1.7064	1.7054	1.7128	0.0951
16.1672	1.7892	1.8237	1.8169	1.7455	1.7948	1.7844	1.7641	1.7467	1.771	0.0954	0.0956	0.0956	16.1671	1.763	1.7903	1.799	1.7438	1.7667	1.7646	1.7442	1.7371	1.7594	0.105	0.0959	0.0952	16.1674	1.7638	1.8115	1.7926	1.7196	1.747	1.7528	1.7474	1.7497	1.7565	0.0952	0.0954	0.0952	16.1671	1.7149	1.6979	1.7421	1.6699	1.7171	1.7113	1.7087	1.709	1.7119	0.0952
16.3339	1.8269	1.8243	1.8227	1.781	1.7927	1.7862	1.7868	1.7511	1.7738	0.0955	0.0956	0.0956	16.3338	1.7652	1.7924	1.8124	1.7434	1.7708	1.8107	1.7459	1.7392	1.7605	0.1048	0.0958	0.0951	16.3341	1.7652	1.8152	1.7939	1.7232	1.75	1.7559	1.7466	1.7491	1.7612	0.0952	0.0954	0.0952	16.3338	1.7131	1.7019	1.7434	1.6679	1.7169	1.7119	1.7078	1.7067	1.7145	0.095
16.5006	1.7682	1.8364	1.8256	1.7507	1.7988	1.7933	1.8026	1.7747	1.7728	0.0954	0.0956	0.0956	16.5005	1.7667	1.7916	1.8036	1.7448	1.7696	1.7711	1.7457	1.7399	1.7432	0.1047	0.0958	0.0952	16.5007	1.7658	1.8199	1.7953	1.7239	1.7502	1.762	1.7514	1.7523	1.7631	0.0953	0.0953	0.0952	16.5005	1.7135	1.7035	1.7437	1.6683	1.7162	1.71	1.7086	1.7102	1.7134	0.095
16.6672	1.8057	1.8396	1.8266	1.7524	1.8003	1.7963	1.8112	1.7714	1.7763	0.0954	0.0956	0.0957	16.6671	1.7678	1.7958	1.8025	1.7469	1.7712	1.7748	1.7448	1.7393	1.7463	0.1049	0.0959	0.0952	16.6674	1.7682	1.8224	1.7926	1.7215	1.7487	1.7582	1.7499	1.7546	1.7623	0.0951	0.0954	0.0951	16.6671	1.7133	1.7017	1.7435	1.6677	1.7147	1.7115	1.7085	1.711	1.7126	0.095
16.8339	1.7638	1.8288	1.8279	1.7564	1.7985	1.7961	1.7776	1.7642	1.7752	0.0954	0.0954	0.0956	16.8338	1.7695	1.7969	1.8053	1.7437	1.774	1.7772	1.7429	1.7387	1.7482	0.1049	0.0958	0.095	16.8341	1.7674	1.8187	1.791	1.7199	1.7509	1.7557	1.7525	1.7533	1.765	0.0953	0.0954	0.0952	16.8338	1.7107	1.7057	1.7457	1.6638	1.7164	1.7122	1.7065	1.7084	1.7143	0.095
17.0006	1.7632	1.8302	1.8301	1.7575	1.8062	1.7987	1.7934	1.7763	1.7824	0.0955	0.0956	0.0957	17.0005	1.7714	1.7934	1.8025	1.7464	1.77	1.7807	1.7429	1.7405	1.7492	0.1049	0.0958	0.0953	17.0007	1.7715	1.8216	1.8009	1.7229	1.7504	1.7635	1.7532	1.7565	1.7688	0.0952	0.0955	0.0952	17.0005	1.7118	1.7056	1.7434	1.6658	1.7127	1.7101	1.7091	1.7116	1.7139	0.095
17.1672	1.7737	1.8502	1.8288	1.7635	1.8034	1.8006	1.7905	1.7838	1.7846	0.0955	0.0956	0.0956	17.1671	1.7697	1.7979	1.8095	1.746	1.7726	1.7838	1.7407	1.7416	1.7482	0.1052	0.0957	0.0952	17.1674	1.7713	1.8206	1.7964	1.721	1.7498	1.7636	1.7544	1.7577	1.7695	0.0953	0.0956	0.0951	17.1671	1.7104	1.7056	1.7425	1.6642	1.7109	1.7093	1.7092	1.711	1.7153	0.0951
17.3339	1.7729	1.8356	1.8309	1.764	1.8095	1.7969	1.7794	1.7678	1.7839	0.0954	0.0955	0.0956	17.3338	1.769	1.7972	1.809	1.7465	1.7738	1.7851	1.7424	1.7404	1.7492	0.1052	0.0958	0.0951	17.3341	1.7733	1.8251	1.8236	1.7229	1.7517	1.7655	1.7556	1.7603	1.7713	0.0951	0.0953	0.0951	17.3338	1.711	1.7093	1.7454	1.6641	1.7122	1.7114	1.7075	1.7105	1.7135	0.0952
17.5006	1.772	1.8279	1.8269	1.7654	1.8114	1.8007	1.7953	1.785	1.7837	0.0954	0.0955	0.0957	17.5005	1.773	1.8006	1.8083	1.746	1.7761	1.7894	1.7426	1.7416	1.7508	0.105	0.0959	0.0952	17.5008	1.7736	1.8304	1.799	1.724	1.7528	1.7699	1.757	1.7607	1.77	0.0951	0.0955	0.0952	17.5005	1.7096	1.7087	1.7444	1.6626	1.7119	1.7096	1.7082	1.7125	1.7138	0.0951
17.6672	1.7744	1.8405	1.8276	1.7635	1.8092	1.8067	1.8036	1.7789	1.7899	0.0954	0.0956	0.0956	17.6672	1.7747	1.8019	1.8078	1.7488	1.7764	1.7872	1.7409	1.7412	1.7524	0.1051	0.0959	0.0952	17.6674	1.7735	1.8274	1.7959	1.7215	1.7533	1.7676	1.7579	1.7612	1.7733	0.0952	0.0955	0.0952	17.6671	1.7085	1.7074	1.7413	1.6617	1.7095	1.7073	1.7096	1.712	1.7158	0.0951
17.8339	1.771	1.8355	1.8294	1.7733	1.8144	1.8052	1.7885	1.7704	1.7911	0.0955	0.0956	0.0957	17.8338	1.7768	1.7992	1.8111	1.7501	1.7776	1.7864	1.7405	1.7382	1.752	0.105	0.0958	0.0952	17.8341	1.7735	1.8264	1.8009	1.7215	1.7521	1.7706	1.7584	1.7615	1.7734	0.0952	0.0954	0.0951	17.8338	1.7093	1.713	1.7456	1.6621	1.7115	1.7091	1.7084	1.7126	1.7162	0.095
18.0006	1.7789	1.8379	1.8488	1.7669	1.8172	1.8045	1.8073	1.7753	1.7928	0.0954	0.0956	0.0957	18.0005	1.7763	1.8048	1.8145	1.7494	1.7794	1.7941	1.7413	1.7368	1.7524	0.1044	0.0959	0.0953	18.0008	1.7734	1.8278	1.7969	1.7208	1.752	1.7722	1.7541	1.7606	1.7753	0.0952	0.0955	0.0952	18.0005	1.7116	1.7119	1.7453	1.6642	1.7076	1.7088	1.7093	1.7145	1.7158	0.095
18.1673	1.7764	1.8357	1.8317	1.7679	1.8339	1.8362	1.795	1.7771	1.7947	0.0955	0.0955	0.0955	18.1672	1.7786	1.8069	1.8187	1.7518	1.7836	1.7928	1.7403	1.7374	1.7543	0.1047	0.0958	0.0952	18.1674	1.775	1.827	1.8006	1.7226	1.7521	1.7755	1.7571	1.7604	1.7726	0.0952	0.0954	0.0951	18.1672	1.7084	1.711	1.7438	1.6624	1.7057	1.7057	1.7088	1.7163	1.7143	0.0952
18.3339	1.7817	1.8504	1.8353	1.7732	1.8142	1.8319	1.7935	1.7822	1.7934	0.0955	0.0956	0.0956	18.3338	1.7802	1.8083	1.8198	1.7517	1.7817	1.7963	1.7371	1.7371	1.7535	0.105	0.0958	0.0953	18.3341	1.7743	1.8304	1.8025	1.7233	1.7512	1.7751	1.757	1.7605	1.7769	0.0953	0.0954	0.0951	18.3338	1.708	1.7143	1.7458	1.6619	1.7065	1.7053	1.7081	1.7164	1.7155	0.0951
18.5006	1.7842	1.8373	1.8365	1.7747	1.8097	1.8017	1.7994	1.7855	1.7937	0.0955	0.0955	0.0957	18.5005	1.7823	1.8084	1.8202	1.7547	1.7818	1.795	1.7388	1.735	1.7556	0.1051	0.0958	0.0952	18.5008	1.7722	1.8314	1.8034	1.7207	1.7516	1.7754	1.7545	1.759	1.7749	0.0952	0.0954	0.0952	18.5005	1.7064	1.7173	1.7474	1.6609	1.7066	1.7055	1.7074	1.715	1.7149	0.0951
18.6673	1.7804	1.8413	1.8406	1.7704	1.8238	1.82	1.7981	1.7798	1.7963	0.0955	0.0956	0.0957	18.6672	1.7845	1.8078	1.8203	1.7544	1.7823	1.797	1.7342	1.7338	1.7551	0.1045	0.0958	0.0952	18.6675	1.7755	1.8307	1.8014	1.7227	1.7521	1.7766	1.7579	1.7594	1.7759	0.0952	0.0954	0.0952	18.6672	1.7048	1.7167	1.748	1.658	1.703	1.704	1.7083	1.7174	1.7138	0.095
18.8339	1.7884	1.8434	1.8401	1.7728	1.8162	1.8056	1.8055	1.7792	1.7945	0.0955	0.0956	0.0957	18.8339	1.7863	1.8113	1.8227	1.7559	1.7853	1.8007	1.7326	1.7325	1.7531	0.1046	0.0958	0.0952	18.8341	1.7744	1.8338	1.8014	1.7215	1.7495	1.7784	1.7553	1.7598	1.7749	0.0953	0.0955	0.0952	18.8338	1.7052	1.7186	1.7481	1.6595	1.7017	1.702	1.7086	1.713	1.7163	0.095
19.0006	1.785	1.8434	1.8411	1.7793	1.8157	1.8371	1.8026	1.7773	1.8374	0.0954	0.0955	0.0956	19.0005	1.7864	1.8091	1.8272	1.7574	1.7847	1.8031	1.7348	1.7314	1.7546	0.1048	0.0959	0.0951	19.0008	1.7767	1.8348	1.8058	1.7244	1.7511	1.7788	1.7557	1.7602	1.774	0.0953	0.0954	0.0952	19.0005	1.7034	1.7171	1.743	1.6574	1.701	1.6999	1.7075	1.7176	1.716	0.0951
19.1673	1.7845	1.8472	1.8381	1.7781	1.8192	1.808	1.803	1.7761	1.8243	0.0955	0.0956	0.0957	19.1672	1.7874	1.8121	1.829	1.7587	1.7856	1.8029	1.7336	1.7287	1.7535	0.105	0.0959	0.0953	19.1675	1.776	1.836	1.8058	1.7233	1.7525	1.7799	1.7568	1.76	1.7752	0.0953	0.0954	0.0951	19.1672	1.7035	1.7199	1.7465	1.6565	1.6992	1.7003	1.706	1.7185	1.7155	0.095
19.3339	1.7916	1.8452	1.8573	1.7782	1.8189	1.8079	1.8061	1.7758	1.8274	0.0955	0.0956	0.0956	19.3339	1.7878	1.8132	1.8256	1.7592	1.7847	1.8011	1.7336	1.7293	1.7558	0.1046	0.0959	0.0952	19.3341	1.7795	1.8403	1.8079	1.7266	1.7523	1.7813	1.7567	1.7604	1.7748	0.0953	0.0955	0.0952	19.3339	1.7027	1.7188	1.7453	1.6565	1.6984	1.7001	1.7052	1.7155	1.7132	0.095
19.5006	1.7944	1.8466	1.8422	1.7823	1.8203	1.8075	1.8075	1.7754	1.8259	0.0954	0.0955	0.0956	19.5005	1.7891	1.8174	1.8316	1.76	1.7878	1.802	1.7323	1.7265	1.7538	0.1046	0.0958	0.0952	19.5008	1.778	1.8413	1.8075	1.7259	1.7511	1.7825	1.7553	1.7608	1.7739	0.0952	0.0954	0.0952	19.5005	1.7051	1.7179	1.7419	1.6592	1.6938	1.6974	1.7084	1.7193	1.7144	0.095
19.6673	1.7877	1.849	1.8444	1.7823	1.8165	1.8307	1.8062	1.7783	1.8219	0.0955	0.0956	0.0957	19.6672	1.7872	1.8154	1.8317	1.7618	1.7867	1.8007	1.7306	1.7265	1.7528	0.1047	0.0958	0.0954	19.6675	1.7807	1.845	1.8086	1.7284	1.7527	1.7823	1.7566	1.7597	1.7754	0.0953	0.0955	0.0952	19.6672	1.703	1.7202	1.7426	1.6564	1.6943	1.6946	1.7086	1.7208	1.7139	0.0951
19.834	1.7908	1.8512	1.8359	1.7882	1.8223	1.8067	1.8101	1.7774	1.8176	0.0955	0.0956	0.0956	19.8339	1.7896	1.8162	1.8335	1.7631	1.7886	1.8045	1.7311	1.7259	1.7544	0.1048	0.0958	0.0952	19.8342	1.7821	1.845	1.8062	1.7291	1.752	1.7822	1.7564	1.7598	1.7751	0.0951	0.0955	0.0951	19.8339	1.7014	1.7225	1.7467	1.655	1.6964	1.6959	1.7062	1.7193	1.7133	0.0951
20.0006	1.7913	1.8488	1.841	1.7865	1.8193	1.8098	1.8083	1.7745	1.8161	0.0955	0.0955	0.0957	20.0005	1.7907	1.8152	1.833	1.7646	1.7886	1.8021	1.7318	1.727	1.7515	0.1045	0.0958	0.0953	20.0008	1.7801	1.8457	1.8085	1.7281	1.7511	1.7836	1.7549	1.7578	1.7759	0.0952	0.0954	0.0951	20.0005	1.7026	1.7225	1.7439	1.6558	1.6946	1.6921	1.7085	1.7191	1.7128	0.095
20.1673	1.7918	1.8496	1.8602	1.7904	1.8163	1.8088	1.812	1.7752	1.8156	0.0955	0.0956	0.0957	20.1672	1.792	1.8142	1.8376	1.7653	1.7864	1.8022	1.7298	1.7247	1.7491	0.1047	0.0959	0.0952	20.1675	1.7824	1.8482	1.8086	1.7314	1.7524	1.7851	1.7561	1.7584	1.7737	0.0952	0.0954	0.0951	20.1672	1.7002	1.7244	1.7431	1.6539	1.6942	1.692	1.7075	1.7199	1.714	0.0951
20.334	1.7951	1.8496	1.8451	1.7902	1.8154	1.8086	1.812	1.7741	1.8152	0.0955	0.0956	0.0957	20.3339	1.7932	1.8187	1.8406	1.7673	1.7877	1.7999	1.7293	1.7241	1.75	0.1045	0.0958	0.0952	20.3342	1.7803	1.8497	1.8059	1.7301	1.7515	1.7853	1.7558	1.7587	1.7715	0.0951	0.0953	0.0952	20.3339	1.7003	1.7252	1.7446	1.6533	1.6919	1.6905	1.7078	1.7188	1.7136	0.0951
20.5006	1.7955	1.8528	1.8411	1.7927	1.8174	1.8076	1.8133	1.7748	1.8147	0.0955	0.0956	0.0957	20.5006	1.7918	1.8184	1.842	1.7673	1.7875	1.8011	1.7272	1.7222	1.7493	0.1045	0.0959	0.0952	20.5008	1.7815	1.8514	1.8083	1.7317	1.751	1.7864	1.7555	1.7593	1.7724	0.0952	0.0954	0.0951	20.5006	1.7006	1.7247	1.7415	1.6531	1.6908	1.6884	1.7079	1.719	1.7149	0.095
20.6673	1.796	1.8525	1.8377	1.7954	1.8148	1.8049	1.8142	1.7726	1.8117	0.0954	0.0956	0.0957	20.6672	1.7903	1.8159	1.8408	1.7677	1.784	1.7999	1.7262	1.7215	1.7468	0.1044	0.0959	0.0951	20.6675	1.7824	1.8559	1.811	1.733	1.7516	1.7868	1.7552	1.7571	1.7711	0.0951	0.0954	0.0951	20.6672	1.7006	1.7251	1.7422	1.6526	1.6882	1.6866	1.7071	1.7169	1.7136	0.0951
20.834	1.7966	1.8525	1.8397	1.7974	1.815	1.8048	1.8138	1.7704	1.8102	0.0954	0.0955	0.0956	20.8339	1.7931	1.8189	1.8408	1.7702	1.7855	1.7992	1.7272	1.7211	1.747	0.1051	0.0958	0.0952	20.8342	1.783	1.8568	1.8158	1.7336	1.7511	1.7875	1.7535	1.7575	1.7724	0.0952	0.0954	0.0952	20.8339	1.7001	1.7247	1.738	1.6524	1.6888	1.6835	1.709	1.7192	1.7146	0.0951
21.0006	1.7977	1.8559	1.8417	1.8007	1.8148	1.8042	1.8161	1.7719	1.8093	0.0955	0.0955	0.0957	21.0006	1.7928	1.8193	1.8441	1.7715	1.7859	1.801	1.7231	1.7215	1.7483	0.1051	0.0959	0.0952	21.0009	1.7824	1.8588	1.8163	1.7346	1.7508	1.7877	1.7538	1.7582	1.7716	0.0952	0.0954	0.0952	21.0006	1.6989	1.7277	1.7405	1.6495	1.6873	1.6838	1.7074	1.7176	1.7151	0.0951
21.1673	1.7967	1.8538	1.8385	1.7994	1.8137	1.803	1.8166	1.77	1.8063	0.0954	0.0956	0.0956	21.1672	1.793	1.8174	1.8418	1.7718	1.7844	1.7985	1.7228	1.7209	1.7467	0.1059	0.0959	0.0953	21.1675	1.783	1.8582	1.815	1.7356	1.7513	1.7858	1.7555	1.7604	1.7719	0.0952	0.0955	0.0952	21.1672	1.6986	1.7269	1.7405	1.6493	1.6856	1.682	1.7088	1.7199	1.714	0.095
21.334	1.7988	1.8521	1.8413	1.8022	1.811	1.8031	1.8158	1.7688	1.8032	0.0954	0.0956	0.0958	21.3339	1.7934	1.8179	1.841	1.7732	1.7852	1.7966	1.723	1.7189	1.7454	0.1057	0.0959	0.0951	21.3342	1.7815	1.858	1.8138	1.7331	1.75	1.7858	1.7533	1.7598	1.7713	0.0953	0.0954	0.0952	21.3339	1.6991	1.727	1.7387	1.6487	1.6848	1.6819	1.7099	1.7203	1.7139	0.0949
21.5007	1.7981	1.8527	1.8411	1.8044	1.8104	1.8029	1.8177	1.7674	1.802	0.0956	0.0955	0.0957	21.5006	1.792	1.818	1.8452	1.7726	1.7839	1.7985	1.7207	1.7187	1.7458	0.1058	0.0958	0.0951	21.5009	1.7831	1.8622	1.8172	1.7352	1.7514	1.7868	1.7543	1.7601	1.7712	0.0952	0.0954	0.0953	21.5006	1.6997	1.7302	1.7402	1.6493	1.6852	1.6813	1.71	1.7204	1.7156	0.095
21.6673	1.7975	1.8524	1.841	1.8057	1.808	1.8028	1.8158	1.7692	1.7995	0.0954	0.0956	0.0957	21.6673	1.7904	1.8181	1.8424	1.7752	1.7825	1.7984	1.7211	1.719	1.7431	0.1058	0.0959	0.0952	21.6676	1.7827	1.8617	1.8241	1.7349	1.7494	1.7876	1.7544	1.7584	1.7711	0.0952	0.0954	0.0952	21.6673	1.6997	1.7305	1.7391	1.6479	1.6837	1.6789	1.7092	1.7195	1.7158	0.0951
21.834	1.7984	1.8552	1.8418	1.807	1.8069	1.8025	1.8181	1.7673	1.7976	0.0955	0.0956	0.0957	21.8339	1.7887	1.8176	1.8405	1.773	1.7831	1.7953	1.7186	1.7199	1.7443	0.1058	0.096	0.0952	21.8342	1.7849	1.8673	1.8258	1.737	1.7512	1.7889	1.7537	1.7608	1.7713	0.0952	0.0956	0.0952	21.8339	1.6967	1.7304	1.7385	1.6446	1.6815	1.6779	1.7098	1.7169	1.7152	0.0952
22.0007	1.799	1.8532	1.8426	1.8078	1.805	1.8004	1.816	1.7643	1.7953	0.0954	0.0955	0.0956	22.0006	1.7933	1.8201	1.8399	1.7761	1.7828	1.794	1.7182	1.7191	1.7428	0.1053	0.096	0.0952	22.0009	1.7838	1.8695	1.8291	1.7355	1.7507	1.7889	1.7542	1.76	1.7702	0.0953	0.0955	0.0952	22.0006	1.6966	1.7276	1.7353	1.6451	1.6788	1.6757	1.711	1.7175	1.715	0.0951
22.1673	1.7976	1.8543	1.8449	1.809	1.8039	1.8008	1.8172	1.7642	1.7933	0.0954	0.0956	0.0956	22.1673	1.7915	1.8197	1.8365	1.7759	1.7794	1.7939	1.7177	1.7159	1.7428	0.1058	0.0959	0.0952	22.1676	1.7845	1.8703	1.8265	1.7357	1.7493	1.7866	1.7528	1.759	1.7707	0.0953	0.0955	0.0952	22.1673	1.6952	1.729	1.7379	1.6432	1.6789	1.6767	1.7097	1.7215	1.7139	0.095
22.334	1.7991	1.8524	1.8434	1.81	1.7993	1.8013	1.8162	1.7645	1.7913	0.0954	0.0955	0.0956	22.3339	1.7905	1.817	1.8348	1.7756	1.7764	1.7918	1.7144	1.7161	1.7413	0.1063	0.0958	0.0952	22.3342	1.7833	1.8704	1.8282	1.7342	1.7498	1.7849	1.7525	1.7598	1.7696	0.0952	0.0954	0.0952	22.3339	1.6961	1.7309	1.7379	1.6429	1.6785	1.6739	1.7091	1.7159	1.7156	0.0951
22.5007	1.7994	1.8533	1.8444	1.8094	1.8004	1.8015	1.8149	1.7607	1.789	0.0954	0.0955	0.0957	22.5006	1.791	1.8219	1.8384	1.7764	1.7796	1.7926	1.7154	1.7158	1.7419	0.1057	0.0957	0.0951	22.5009	1.7815	1.8727	1.8311	1.7332	1.7477	1.7861	1.7518	1.7584	1.7702	0.0954	0.0955	0.0953	22.5006	1.6953	1.7288	1.7352	1.6418	1.6765	1.6727	1.7115	1.7201	1.7139	0.095
22.6673	1.7999	1.8488	1.8403	1.8112	1.7961	1.7963	1.8152	1.7598	1.7881	0.0955	0.0956	0.0958	22.6673	1.7919	1.8215	1.8404	1.7769	1.7759	1.7926	1.7171	1.7174	1.741	0.1057	0.0959	0.0952	22.6676	1.782	1.8724	1.8285	1.7349	1.7481	1.7825	1.7515	1.7582	1.7691	0.0953	0.0954	0.0953	22.6673	1.6928	1.7294	1.7354	1.6388	1.676	1.6716	1.7082	1.7178	1.715	0.0951
22.834	1.7988	1.851	1.8407	1.8098	1.7965	1.7977	1.815	1.7604	1.7859	0.0954	0.0955	0.0957	22.8339	1.7917	1.8241	1.8375	1.7771	1.7769	1.7906	1.7134	1.7165	1.7381	0.1057	0.0959	0.0952	22.8343	1.7814	1.8747	1.835	1.7338	1.7475	1.7861	1.7498	1.7583	1.7657	0.0952	0.0954	0.0953	22.834	1.6962	1.7305	1.7371	1.6402	1.6756	1.6714	1.7104	1.7204	1.7159	0.0949
23.0007	1.7994	1.849	1.8393	1.8092	1.7941	1.7942	1.8134	1.7592	1.783	0.0954	0.0955	0.0956	23.0006	1.7907	1.8246	1.837	1.7766	1.7754	1.7888	1.7143	1.7162	1.7375	0.1056	0.0959	0.0952	23.0009	1.7821	1.8756	1.8346	1.734	1.748	1.7852	1.7491	1.7592	1.7709	0.0952	0.0955	0.0951	23.0006	1.6947	1.7309	1.735	1.6401	1.6737	1.6673	1.7124	1.7216	1.7152	0.095
23.1673	1.7966	1.8472	1.8386	1.8082	1.7929	1.7923	1.813	1.7596	1.7818	0.0955	0.0956	0.0957	23.1673	1.7897	1.8212	1.8345	1.7767	1.7695	1.7854	1.7136	1.7162	1.7391	0.1054	0.0959	0.0953	23.1676	1.7804	1.8757	1.8358	1.7338	1.7449	1.7853	1.7504	1.7585	1.7699	0.0951	0.0954	0.0952	23.1673	1.6943	1.7325	1.7371	1.639	1.6763	1.6689	1.7105	1.7212	1.7168	0.095
23.334	1.7954	1.8462	1.838	1.8084	1.7913	1.7909	1.8118	1.7578	1.7818	0.0954	0.0955	0.0957	23.334	1.7904	1.8245	1.8333	1.7771	1.7723	1.7842	1.7124	1.7162	1.7369	0.1057	0.0958	0.0952	23.3343	1.7805	1.8779	1.8367	1.7329	1.7468	1.7838	1.7486	1.758	1.7696	0.0952	0.0955	0.0952	23.334	1.6945	1.7314	1.7363	1.6392	1.6715	1.6676	1.7124	1.722	1.7167	0.0951
23.5007	1.7949	1.8444	1.8355	1.8053	1.7902	1.789	1.8088	1.7578	1.7779	0.0955	0.0955	0.0957	23.5006	1.7873	1.8246	1.8331	1.7758	1.7722	1.782	1.7114	1.7147	1.7375	0.1056	0.0959	0.0952	23.5009	1.7797	1.8782	1.8372	1.7322	1.7464	1.7838	1.7477	1.7587	1.7703	0.0952	0.0955	0.0952	23.5006	1.6936	1.7291	1.7339	1.6386	1.6709	1.6642	1.714	1.7205	1.7159	0.0951
23.6674	1.7938	1.8444	1.8346	1.8032	1.7878	1.7884	1.8096	1.7548	1.7772	0.0955	0.0955	0.0957	23.6673	1.7889	1.8235	1.83	1.7759	1.769	1.782	1.7105	1.7139	1.7361	0.1054	0.0959	0.0953	23.6676	1.7795	1.8797	1.8398	1.7327	1.7456	1.783	1.7475	1.7581	1.768	0.0952	0.0954	0.0952	23.6673	1.6931	1.7312	1.7347	1.6367	1.671	1.6647	1.7136	1.7202	1.718	0.095
23.834	1.7933	1.8433	1.8342	1.8035	1.7852	1.7864	1.8079	1.7549	1.7755	0.0953	0.0954	0.0957	23.834	1.7886	1.8213	1.8277	1.7761	1.7653	1.7786	1.7098	1.7142	1.7344	0.1055	0.0959	0.0952	23.8343	1.7795	1.8816	1.8403	1.7326	1.7485	1.7833	1.7469	1.759	1.7657	0.0953	0.0954	0.0952	23.834	1.6929	1.735	1.7388	1.636	1.6717	1.6648	1.7138	1.7216	1.72	0.095
24.0007	1.7931	1.8423	1.8334	1.8034	1.7854	1.7863	1.8048	1.7545	1.7748	0.0954	0.0956	0.0958	24.0006	1.7863	1.8246	1.829	1.7745	1.767	1.7804	1.7071	1.714	1.7369	0.1046	0.0959	0.0952	24.001	1.7785	1.8807	1.8413	1.7321	1.7451	1.7821	1.747	1.7585	1.7684	0.0953	0.0954	0.0952	24.0007	1.6932	1.7327	1.7356	1.6368	1.6701	1.6611	1.7101	1.7184	1.7172	0.0949
24.1674	1.7919	1.8399	1.8306	1.8046	1.7845	1.7842	1.8038	1.7546	1.7724	0.0954	0.0955	0.0957	24.1673	1.7881	1.8242	1.8255	1.7765	1.7653	1.776	1.7091	1.7141	1.7349	0.1057	0.0958	0.0953	24.1676	1.7767	1.8821	1.8421	1.7314	1.7456	1.7824	1.7461	1.7585	1.768	0.0953	0.0954	0.0953	24.1673	1.6934	1.7336	1.7387	1.6358	1.6685	1.6628	1.7143	1.7222	1.7201	0.0951
24.334	1.7914	1.8419	1.8307	1.8041	1.7861	1.7832	1.8039	1.754	1.7712	0.0954	0.0956	0.0957	24.334	1.7868	1.8269	1.829	1.7752	1.7677	1.7769	1.7067	1.7148	1.735	0.106	0.0959	0.0952	24.3343	1.777	1.8816	1.8414	1.7311	1.7453	1.7819	1.7455	1.7587	1.7668	0.0952	0.0955	0.0952	24.334	1.694	1.7324	1.7334	1.6357	1.6673	1.6612	1.7152	1.72	1.7178	0.0951
24.5007	1.7902	1.8398	1.8303	1.8032	1.7824	1.7827	1.8016	1.7521	1.7693	0.0954	0.0955	0.0957	24.5007	1.7866	1.8251	1.8261	1.7748	1.7659	1.7762	1.7055	1.7131	1.7351	0.1057	0.096	0.0953	24.501	1.774	1.8818	1.8427	1.7303	1.7429	1.7809	1.7419	1.757	1.7672	0.0952	0.0955	0.0951	24.5007	1.6933	1.7347	1.7371	1.6351	1.6685	1.6612	1.714	1.7207	1.7175	0.095
24.6674	1.7902	1.8363	1.8259	1.8026	1.7813	1.7788	1.8007	1.7528	1.7689	0.0954	0.0955	0.0957	24.6673	1.7876	1.8264	1.8254	1.7761	1.7667	1.775	1.7063	1.7137	1.7347	0.1058	0.0959	0.0952	24.6676	1.7762	1.8833	1.8423	1.7327	1.7447	1.781	1.7419	1.7564	1.7668	0.0953	0.0954	0.0951	24.6673	1.6923	1.7327	1.7341	1.6351	1.6663	1.6588	1.7151	1.72	1.7194	0.095
24.8341	1.7882	1.8358	1.8237	1.8025	1.7805	1.7779	1.7977	1.7497	1.7677	0.0954	0.0955	0.0956	24.834	1.7844	1.8252	1.827	1.7741	1.7637	1.7727	1.702	1.7118	1.7333	0.1056	0.0959	0.0952	24.8343	1.7743	1.8843	1.8409	1.7321	1.7466	1.7803	1.7422	1.7586	1.7655	0.0953	0.0954	0.0952	24.834	1.6921	1.7362	1.7371	1.6334	1.6666	1.6604	1.7156	1.7214	1.7191	0.095
25.0007	1.7878	1.8354	1.8228	1.8023	1.7796	1.7763	1.7967	1.7505	1.7659	0.0954	0.0956	0.0956	25.0007	1.7859	1.8256	1.8245	1.7737	1.761	1.7723	1.704	1.713	1.7339	0.1055	0.0959	0.0953	25.001	1.7744	1.8862	1.8452	1.7325	1.7465	1.7797	1.7427	1.7587	1.7668	0.0952	0.0954	0.0953	25.0007	1.6932	1.7355	1.736	1.6338	1.6647	1.6598	1.7172	1.7199	1.7188	0.095
25.1674	1.7862	1.835	1.8228	1.8018	1.777	1.7769	1.7965	1.7496	1.7643	0.0954	0.0955	0.0957	25.1673	1.7836	1.8258	1.82	1.7732	1.7622	1.7696	1.7039	1.7111	1.7331	0.1054	0.096	0.0953	25.1677	1.7726	1.8853	1.8405	1.7318	1.7462	1.7777	1.7414	1.7577	1.7664	0.0953	0.0957	0.0953	25.1674	1.6928	1.7355	1.7357	1.6349	1.6657	1.6561	1.7167	1.7218	1.7197	0.095
25.3341	1.7863	1.8334	1.8212	1.8024	1.7775	1.7751	1.7957	1.7487	1.7643	0.0953	0.0956	0.0956	25.334	1.7838	1.826	1.8194	1.7729	1.7609	1.7691	1.7022	1.7124	1.7303	0.1054	0.0959	0.0953	25.3343	1.7708	1.8863	1.8414	1.731	1.7478	1.7775	1.7414	1.7572	1.7661	0.0953	0.0956	0.0953	25.334	1.6934	1.7357	1.7372	1.6336	1.6646	1.659	1.716	1.7164	1.7197	0.095
25.5007	1.7855	1.8291	1.8171	1.7999	1.7757	1.7726	1.7947	1.7464	1.7607	0.0953	0.0955	0.0956	25.5007	1.784	1.8261	1.8182	1.772	1.7607	1.7676	1.7025	1.7121	1.7325	0.1058	0.096	0.0953	25.501	1.7716	1.8858	1.8418	1.7323	1.7443	1.7784	1.7417	1.7585	1.7642	0.0953	0.0955	0.0952	25.5007	1.6953	1.7359	1.7349	1.636	1.667	1.6559	1.7195	1.7241	1.7198	0.095
25.6674	1.7832	1.8315	1.8181	1.7997	1.7771	1.7731	1.7952	1.7482	1.7605	0.0954	0.0956	0.0958	25.6674	1.7832	1.8246	1.8167	1.771	1.7603	1.7659	1.6996	1.7116	1.7311	0.1054	0.096	0.0952	25.6677	1.77	1.8854	1.8417	1.7311	1.7469	1.7772	1.7423	1.7587	1.7651	0.0952	0.0954	0.0953	25.6674	1.6941	1.7375	1.7363	1.6343	1.6683	1.655	1.718	1.7219	1.722	0.095
25.8341	1.7806	1.8272	1.814	1.798	1.7736	1.7704	1.7934	1.7468	1.7593	0.0955	0.0956	0.0957	25.834	1.7831	1.8256	1.8179	1.7701	1.7585	1.767	1.6992	1.7114	1.7319	0.1047	0.0959	0.0952	25.8343	1.7698	1.8861	1.8427	1.7311	1.747	1.7779	1.7411	1.7585	1.7632	0.0953	0.0954	0.0952	25.834	1.6953	1.7381	1.7384	1.6356	1.6697	1.6555	1.7185	1.7214	1.7216	0.0949
26.0007	1.7795	1.8248	1.8123	1.7982	1.773	1.7687	1.7918	1.747	1.758	0.0954	0.0955	0.0957	26.0007	1.782	1.8261	1.816	1.7689	1.7589	1.7657	1.7018	1.711	1.7321	0.1049	0.096	0.0952	26.001	1.768	1.8867	1.8431	1.7315	1.7465	1.7772	1.7386	1.7584	1.7644	0.0952	0.0955	0.0952	26.0007	1.6935	1.7386	1.738	1.6338	1.6702	1.6552	1.7194	1.7263	1.7237	0.0951
26.1674	1.7789	1.825	1.8119	1.7977	1.7729	1.7674	1.7926	1.7476	1.7579	0.0953	0.0955	0.0956	26.1674	1.782	1.8278	1.8139	1.7675	1.7576	1.7634	1.6995	1.7119	1.7317	0.1048	0.096	0.0953	26.1677	1.7657	1.8839	1.8409	1.7294	1.7441	1.7744	1.7384	1.7589	1.7658	0.0953	0.0955	0.0953	26.1674	1.695	1.7376	1.7358	1.6346	1.6678	1.652	1.7202	1.7234	1.7232	0.095
26.3341	1.7778	1.8238	1.8108	1.7972	1.7708	1.7661	1.7886	1.7463	1.7567	0.0953	0.0956	0.0956	26.334	1.7809	1.8268	1.8106	1.7665	1.7563	1.7626	1.6988	1.7107	1.7293	0.1053	0.0959	0.0952	26.3344	1.768	1.8856	1.8408	1.7317	1.7454	1.7772	1.7394	1.7593	1.7653	0.0952	0.0955	0.0952	26.3341	1.6984	1.743	1.7424	1.6376	1.6701	1.6576	1.7222	1.7237	1.7232	0.0951
26.5008	1.7766	1.8208	1.8073	1.7965	1.7685	1.7644	1.7894	1.746	1.756	0.0954	0.0955	0.0957	26.5007	1.7798	1.8267	1.81	1.7662	1.7559	1.7614	1.6971	1.71	1.7304	0.1048	0.096	0.0952	26.501	1.7661	1.8873	1.8436	1.7308	1.7478	1.7781	1.7385	1.7601	1.7656	0.0953	0.0955	0.0951	26.5007	1.6976	1.7402	1.7377	1.6361	1.666	1.6535	1.7227	1.7255	1.7227	0.0949
26.6674	1.777	1.8216	1.8058	1.797	1.7692	1.7624	1.7887	1.7465	1.7543	0.0953	0.0955	0.0957	26.6674	1.7794	1.8258	1.8096	1.7659	1.7552	1.7591	1.6975	1.7113	1.7282	0.1049	0.096	0.0952	26.6677	1.7669	1.8882	1.8438	1.7318	1.7489	1.7777	1.7378	1.7596	1.7669	0.0952	0.0956	0.0953	26.6674	1.6989	1.7413	1.7401	1.6372	1.6655	1.6542	1.7236	1.7213	1.7265	0.0952
26.8341	1.7743	1.819	1.8037	1.7934	1.7668	1.762	1.7863	1.7448	1.7526	0.0954	0.0955	0.0957	26.834	1.7781	1.8251	1.8086	1.7642	1.7547	1.7586	1.6982	1.71	1.7298	0.1049	0.0959	0.0952	26.8344	1.7631	1.8839	1.8414	1.7294	1.7443	1.7762	1.7357	1.7586	1.7666	0.0952	0.0954	0.0953	26.8341	1.6999	1.7441	1.7412	1.6388	1.666	1.6551	1.725	1.7197	1.7241	0.0951
27.0008	1.7735	1.8179	1.8022	1.7936	1.7675	1.7598	1.7845	1.7435	1.7501	0.0953	0.0956	0.0956	27.0007	1.7791	1.8265	1.8117	1.7644	1.7558	1.7588	1.6959	1.7097	1.7304	0.1051	0.0959	0.0951	27.001	1.7675	1.8877	1.8425	1.734	1.7483	1.7748	1.7383	1.7591	1.7664	0.0951	0.0955	0.0953	27.0007	1.699	1.7432	1.7403	1.6378	1.6647	1.6546	1.7268	1.7186	1.7254	0.095
27.1674	1.7728	1.8177	1.8031	1.7941	1.7654	1.7609	1.7849	1.7439	1.7494	0.0954	0.0956	0.0957	27.1674	1.7779	1.8278	1.8069	1.7645	1.754	1.7571	1.6953	1.7099	1.7301	0.1045	0.096	0.0952	27.1677	1.7654	1.8869	1.8446	1.7329	1.7462	1.7768	1.7381	1.7603	1.7648	0.0952	0.0955	0.0951	27.1674	1.702	1.7474	1.7445	1.6396	1.667	1.6557	1.7262	1.7168	1.7282	0.095
27.3341	1.7691	1.8171	1.8011	1.7903	1.7649	1.7596	1.7836	1.7447	1.7495	0.0954	0.0955	0.0956	27.3341	1.7799	1.8275	1.8108	1.7657	1.754	1.7573	1.6973	1.7102	1.7274	0.1048	0.096	0.0952	27.3344	1.7625	1.8877	1.8458	1.7318	1.7465	1.7766	1.7376	1.758	1.7667	0.0951	0.0955	0.0952	27.3341	1.7031	1.7488	1.7475	1.6418	1.6674	1.6603	1.7259	1.713	1.7296	0.0951
27.5008	1.7697	1.8138	1.7986	1.7912	1.7645	1.7575	1.7828	1.7436	1.7486	0.0954	0.0955	0.0956	27.5007	1.7767	1.8275	1.8079	1.7626	1.7521	1.7568	1.6957	1.7082	1.7287	0.1049	0.0958	0.0951	27.5011	1.7618	1.8906	1.8416	1.7321	1.7473	1.776	1.7363	1.7604	1.7642	0.0952	0.0955	0.0952	27.5008	1.704	1.7466	1.7426	1.6414	1.6663	1.6559	1.7288	1.7131	1.7285	0.0951
27.6675	1.7683	1.8119	1.7953	1.7906	1.7623	1.7558	1.7798	1.7427	1.7482	0.0953	0.0955	0.0956	27.6674	1.778	1.8285	1.8059	1.7636	1.7535	1.7555	1.6974	1.7096	1.7263	0.1048	0.0959	0.0953	27.6677	1.7631	1.8898	1.8406	1.7351	1.7511	1.7767	1.7372	1.7612	1.7649	0.0952	0.0955	0.0953	27.6674	1.7016	1.7503	1.7456	1.6414	1.667	1.6573	1.727	1.7039	1.7282	0.0951
27.8341	1.7669	1.812	1.7925	1.789	1.7626	1.754	1.7817	1.7424	1.7464	0.0954	0.0956	0.0956	27.8341	1.7756	1.8262	1.8072	1.7617	1.7507	1.754	1.694	1.708	1.7261	0.1047	0.096	0.0952	27.8344	1.7603	1.8883	1.8406	1.7328	1.748	1.7756	1.7348	1.7617	1.7654	0.0952	0.0955	0.0952	27.8341	1.7042	1.7476	1.7448	1.6428	1.6626	1.6549	1.7287	1.702	1.7273	0.0949
28.0008	1.7678	1.81	1.7938	1.7891	1.7619	1.7559	1.7816	1.7419	1.7455	0.0954	0.0956	0.0957	28.0007	1.7763	1.8263	1.805	1.7618	1.7516	1.7529	1.694	1.7086	1.7282	0.1046	0.0958	0.0952	28.0011	1.7618	1.8889	1.8431	1.7345	1.7497	1.7767	1.7373	1.7615	1.7661	0.095	0.0954	0.0951	28.0008	1.7031	1.7514	1.7476	1.6423	1.6665	1.6596	1.7288	1.7002	1.7289	0.0951
28.1675	1.7652	1.8109	1.7929	1.7892	1.7627	1.755	1.7823	1.7428	1.7439	0.0953	0.0955	0.0956	28.1674	1.7763	1.8276	1.8032	1.7609	1.7518	1.7523	1.6939	1.7082	1.7274	0.1049	0.096	0.0952	28.1677	1.7601	1.8863	1.8389	1.7323	1.7476	1.7737	1.7362	1.7606	1.7644	0.095	0.0955	0.0952	28.1674	1.7066	1.7494	1.745	1.6448	1.6646	1.6551	1.7306	1.6973	1.7301	0.0949
28.3341	1.7638	1.8083	1.7908	1.788	1.7601	1.7538	1.779	1.7398	1.7407	0.0954	0.0955	0.0956	28.3341	1.7755	1.8277	1.8071	1.76	1.7504	1.7543	1.694	1.7069	1.7277	0.1048	0.0959	0.0952	28.3344	1.759	1.8892	1.8426	1.733	1.75	1.7767	1.7354	1.7608	1.7659	0.0951	0.0954	0.0952	28.3341	1.7074	1.752	1.75	1.6466	1.6687	1.6601	1.7304	1.6916	1.7317	0.0951
28.5008	1.7637	1.8109	1.7913	1.7855	1.7612	1.7547	1.7774	1.7401	1.7421	0.0954	0.0955	0.0957	28.5008	1.7757	1.8259	1.8034	1.7604	1.7507	1.7509	1.6926	1.7092	1.7261	0.1054	0.0959	0.0952	28.5011	1.7584	1.8865	1.8411	1.7335	1.7481	1.7749	1.7357	1.7613	1.7678	0.0951	0.0954	0.0952	28.5008	1.7112	1.7521	1.7458	1.6514	1.6683	1.6545	1.7328	1.6888	1.7308	0.095
28.6675	1.7632	1.8108	1.789	1.7855	1.762	1.7546	1.7774	1.7405	1.7392	0.0954	0.0956	0.0957	28.6674	1.7745	1.8252	1.8038	1.7608	1.7482	1.7517	1.6941	1.7057	1.7286	0.1048	0.096	0.0952	28.6678	1.7576	1.8869	1.8415	1.7353	1.7488	1.7756	1.7385	1.7613	1.7672	0.095	0.0955	0.0952	28.6675	1.709	1.7519	1.7484	1.6495	1.6666	1.6568	1.7328	1.682	1.7321	0.0951
28.8341	1.7613	1.8052	1.7859	1.7836	1.7594	1.7509	1.7768	1.7393	1.7411	0.0954	0.0956	0.0957	28.8341	1.7735	1.8274	1.8036	1.7599	1.7495	1.7513	1.6917	1.7062	1.7232	0.1048	0.096	0.0953	28.8344	1.7572	1.8854	1.8398	1.7345	1.7469	1.776	1.7359	1.7614	1.7675	0.095	0.0955	0.0953	28.8341	1.7115	1.7549	1.7516	1.6526	1.6723	1.6591	1.7339	1.6773	1.7341	0.095
29.0008	1.7602	1.8031	1.7832	1.7836	1.7582	1.7497	1.7737	1.7386	1.7396	0.0954	0.0955	0.0957	29.0008	1.7734	1.8261	1.8022	1.7599	1.7504	1.7493	1.6913	1.708	1.726	0.1042	0.0959	0.0953	29.0011	1.7577	1.8886	1.8417	1.7356	1.752	1.7763	1.7346	1.7616	1.7685	0.0951	0.0955	0.0952	29.0008	1.712	1.7537	1.7507	1.6549	1.6705	1.6596	1.7348	1.6774	1.7323	0.095
29.1675	1.759	1.8025	1.7787	1.7821	1.7582	1.7466	1.7741	1.739	1.7393	0.0954	0.0956	0.0956	29.1674	1.7741	1.8278	1.8045	1.7594	1.7467	1.7512	1.6896	1.7056	1.7251	0.1042	0.0959	0.0952	29.1678	1.7566	1.8854	1.8374	1.7346	1.7494	1.7748	1.737	1.7623	1.7673	0.0952	0.0954	0.0952	29.1675	1.7127	1.7545	1.7541	1.6546	1.6704	1.6573	1.7337	1.6718	1.7352	0.0949
29.3341	1.7583	1.8013	1.7799	1.7803	1.7572	1.7454	1.7737	1.7373	1.7381	0.0954	0.0957	0.0957	29.3341	1.7728	1.8262	1.7994	1.7591	1.7472	1.7477	1.6908	1.7065	1.7274	0.1045	0.0959	0.0952	29.3344	1.7563	1.8869	1.8401	1.7357	1.7498	1.7767	1.7362	1.762	1.7675	0.0951	0.0955	0.0953	29.3341	1.7145	1.7559	1.7521	1.658	1.6751	1.6526	1.7365	1.6731	1.734	0.095
29.5008	1.7588	1.8006	1.7805	1.7809	1.7555	1.7454	1.7754	1.7375	1.7389	0.0954	0.0956	0.0957	29.5008	1.7721	1.8272	1.8008	1.7589	1.7465	1.75	1.6927	1.7063	1.727	0.1046	0.0959	0.0953	29.5011	1.7564	1.8868	1.8382	1.7367	1.7511	1.7755	1.7368	1.7643	1.7684	0.0951	0.0955	0.0952	29.5008	1.7139	1.7551	1.7571	1.657	1.6716	1.6576	1.7365	1.6689	1.7354	0.095
29.6675	1.7572	1.7998	1.7807	1.779	1.7544	1.7445	1.7726	1.7358	1.7379	0.0954	0.0955	0.0957	29.6675	1.7728	1.8264	1.8	1.7596	1.7469	1.749	1.6921	1.7065	1.7262	0.1046	0.0959	0.0952	29.6678	1.7555	1.8872	1.8389	1.7354	1.7519	1.7757	1.7349	1.7632	1.7674	0.0951	0.0955	0.0953	29.6675	1.7159	1.7545	1.7558	1.6599	1.6705	1.6557	1.7361	1.6706	1.734	0.0951
29.8342	1.7551	1.7982	1.7791	1.777	1.7535	1.7442	1.7704	1.7373	1.7384	0.0953	0.0956	0.0957	29.8341	1.773	1.8273	1.8003	1.7612	1.7474	1.7494	1.6896	1.7056	1.7232	0.1045	0.0959	0.0953	29.8345	1.7559	1.8877	1.8381	1.7378	1.7513	1.7766	1.7384	1.7649	1.7687	0.095	0.0955	0.0952	29.8341	1.7179	1.7606	1.7596	1.6609	1.6746	1.6614	1.7367	1.667	1.7324	0.0949
30.0008	1.7538	1.7957	1.7769	1.7773	1.751	1.7422	1.7732	1.7362	1.736	0.0953	0.0955	0.0957	30.0008	1.7715	1.8265	1.8007	1.7586	1.7446	1.7482	1.6906	1.7052	1.7251	0.1049	0.0961	0.0953	30.0011	1.7555	1.8885	1.8411	1.7376	1.7529	1.7795	1.7376	1.7629	1.7696	0.0951	0.0954	0.0952	30.0008	1.7182	1.7607	1.7581	1.6616	1.6755	1.6624	1.7388	1.6715	1.7388	0.0951
30.1675	1.7517	1.795	1.7768	1.777	1.751	1.7426	1.7714	1.736	1.7368	0.0953	0.0955	0.0957	30.1675	1.7711	1.8296	1.8023	1.7589	1.7475	1.749	1.6882	1.7051	1.7266	0.1048	0.0959	0.0952	30.1678	1.7546	1.888	1.8392	1.7381	1.7539	1.7788	1.7367	1.7635	1.771	0.095	0.0955	0.0952	30.1675	1.7191	1.7613	1.7598	1.6632	1.6754	1.6639	1.7393	1.6712	1.7361	0.0949
30.3342	1.7511	1.7953	1.7756	1.7767	1.7516	1.7402	1.7714	1.7349	1.7373	0.0953	0.0956	0.0956	30.3342	1.7719	1.8275	1.7973	1.7595	1.7489	1.7458	1.6888	1.7057	1.7227	0.1045	0.096	0.0953	30.3345	1.7535	1.8886	1.8408	1.738	1.7554	1.7777	1.7379	1.7648	1.7695	0.0951	0.0955	0.0952	30.3342	1.7187	1.7592	1.7595	1.6642	1.6728	1.664	1.739	1.6711	1.7392	0.0951
30.5008	1.7502	1.7944	1.7763	1.7767	1.7493	1.7399	1.7696	1.7344	1.7349	0.0953	0.0955	0.0956	30.5008	1.7725	1.8294	1.8022	1.7603	1.7482	1.7484	1.6888	1.7056	1.7245	0.104	0.096	0.0952	30.5011	1.753	1.8897	1.8425	1.7376	1.7563	1.7776	1.7371	1.7633	1.7706	0.0951	0.0955	0.0951	30.5008	1.7192	1.7609	1.7591	1.6656	1.6747	1.6626	1.7384	1.6713	1.7387	0.0949
30.6675	1.7485	1.7937	1.7745	1.7768	1.7486	1.7394	1.7691	1.7331	1.7347	0.0954	0.0955	0.0956	30.6675	1.7717	1.8277	1.7992	1.7614	1.7476	1.7457	1.6897	1.7048	1.7241	0.104	0.0959	0.0952	30.6678	1.7554	1.8879	1.8426	1.7407	1.7555	1.7787	1.7376	1.766	1.7688	0.095	0.0954	0.0951	30.6675	1.7226	1.7648	1.7603	1.6709	1.6759	1.6628	1.7406	1.6727	1.7405	0.095
30.8342	1.7489	1.7924	1.7733	1.7768	1.7489	1.7397	1.7686	1.7357	1.7329	0.0952	0.0955	0.0956	30.8342	1.7722	1.8225	1.7926	1.7601	1.7429	1.7413	1.6889	1.7046	1.7239	0.1039	0.0959	0.0951	30.8345	1.7543	1.8861	1.8391	1.7405	1.754	1.7761	1.738	1.7654	1.7715	0.095	0.0955	0.0952	30.8342	1.7217	1.7658	1.7626	1.6698	1.6779	1.6642	1.7424	1.674	1.741	0.0951
31.0008	1.7461	1.795	1.7759	1.7752	1.7499	1.7405	1.7687	1.7326	1.7313	0.0953	0.0955	0.0957	31.0008	1.7717	1.8299	1.8023	1.7605	1.7485	1.7488	1.6875	1.7044	1.7251	0.1037	0.0959	0.0951	31.0011	1.7523	1.8864	1.8381	1.7411	1.756	1.7762	1.7384	1.7668	1.7696	0.095	0.0955	0.0951	31.0008	1.7233	1.7681	1.7629	1.6727	1.68	1.6639	1.7421	1.6711	1.7398	0.0949
31.1675	1.7461	1.793	1.7753	1.7756	1.7474	1.7398	1.7668	1.7346	1.73	0.0953	0.0955	0.0956	31.1675	1.773	1.8282	1.799	1.7603	1.7473	1.7468	1.6897	1.7057	1.7242	0.1036	0.0959	0.0952	31.1678	1.7538	1.8878	1.8382	1.742	1.7561	1.7774	1.7381	1.7671	1.7734	0.0951	0.0954	0.0952	31.1675	1.7238	1.7661	1.7649	1.6741	1.6799	1.6652	1.7429	1.6734	1.739	0.095
31.3342	1.7448	1.7887	1.7731	1.7757	1.7446	1.7384	1.7666	1.734	1.731	0.0954	0.0955	0.0957	31.3342	1.7746	1.8283	1.8021	1.7621	1.7478	1.7488	1.6895	1.7035	1.7232	0.1037	0.0959	0.0953	31.3345	1.7508	1.8883	1.8387	1.7409	1.7551	1.7796	1.7389	1.768	1.7706	0.095	0.0955	0.0952	31.3342	1.7232	1.7658	1.7648	1.6752	1.6824	1.6651	1.7412	1.671	1.7412	0.095
31.5009	1.7446	1.7897	1.777	1.7756	1.7455	1.7391	1.7654	1.7327	1.7296	0.0953	0.0954	0.0957	31.5008	1.7733	1.8261	1.798	1.7601	1.7457	1.745	1.6881	1.7036	1.7244	0.1036	0.0959	0.0952	31.5012	1.7522	1.8871	1.837	1.742	1.758	1.7801	1.738	1.766	1.7713	0.0951	0.0955	0.0952	31.5009	1.7221	1.7643	1.7637	1.6738	1.6802	1.6623	1.7419	1.673	1.7414	0.095
31.6675	1.7436	1.7905	1.7805	1.7755	1.7461	1.7409	1.7641	1.7315	1.7283	0.0952	0.0954	0.0956	31.6675	1.7747	1.8293	1.8022	1.7627	1.7482	1.7473	1.6891	1.7037	1.7244	0.1037	0.096	0.0953	31.6678	1.7512	1.8914	1.8334	1.7426	1.757	1.785	1.7382	1.7678	1.7739	0.095	0.0954	0.0951	31.6675	1.7238	1.7654	1.7656	1.6785	1.6828	1.6639	1.7424	1.6732	1.7409	0.095
31.8342	1.7442	1.7893	1.7791	1.7755	1.7467	1.7405	1.7642	1.7311	1.7289	0.0953	0.0955	0.0956	31.8342	1.7742	1.8279	1.7998	1.7619	1.7477	1.743	1.6905	1.7035	1.7233	0.1036	0.0959	0.0952	31.8345	1.7546	1.8924	1.8332	1.7437	1.758	1.7863	1.7414	1.7662	1.7736	0.0951	0.0954	0.0952	31.8342	1.7277	1.7656	1.7689	1.6816	1.6817	1.6645	1.744	1.6718	1.7421	0.0949
32.0009	1.7447	1.7894	1.78	1.7759	1.7447	1.7441	1.7635	1.7297	1.7282	0.0954	0.0955	0.0957	32.0009	1.7745	1.8277	1.8052	1.762	1.7471	1.7468	1.6873	1.7032	1.7251	0.1035	0.0959	0.0953	32.0012	1.7542	1.8914	1.8319	1.7437	1.7585	1.7858	1.7388	1.7682	1.7733	0.095	0.0954	0.0953	32.0009	1.7278	1.7656	1.7691	1.6821	1.6815	1.6621	1.7452	1.6739	1.7434	0.0949
32.1675	1.7418	1.7893	1.7781	1.7752	1.7454	1.7444	1.7616	1.7274	1.7281	0.0953	0.0955	0.0955	32.1675	1.7732	1.8274	1.8006	1.7612	1.7464	1.7453	1.6885	1.7037	1.7252	0.1036	0.0959	0.0953	32.1678	1.7541	1.8927	1.8322	1.7449	1.7579	1.7875	1.7407	1.7701	1.7736	0.0951	0.0955	0.0953	32.1675	1.729	1.7638	1.7696	1.6828	1.6771	1.6636	1.7452	1.6715	1.7424	0.0949
32.3342	1.7425	1.7907	1.7777	1.7762	1.7459	1.7486	1.7608	1.7286	1.7284	0.0954	0.0955	0.0956	32.3342	1.7741	1.8264	1.8011	1.7621	1.7473	1.746	1.6907	1.7025	1.7257	0.1035	0.0961	0.0952	32.3345	1.755	1.8922	1.8294	1.7452	1.7594	1.7856	1.7382	1.7698	1.7763	0.0951	0.0955	0.0952	32.3342	1.7288	1.7667	1.771	1.6846	1.6803	1.6616	1.7445	1.6731	1.7436	0.095
32.5009	1.7417	1.7905	1.7746	1.7771	1.7456	1.7464	1.7621	1.7276	1.727	0.0953	0.0956	0.0956	32.5009	1.7746	1.8254	1.7983	1.7634	1.7458	1.7469	1.6899	1.705	1.7252	0.1037	0.0959	0.0952	32.5012	1.7584	1.892	1.8298	1.7478	1.7627	1.7851	1.7417	1.77	1.7734	0.095	0.0954	0.0951	32.5009	1.7282	1.7698	1.7757	1.683	1.6787	1.6646	1.7484	1.6758	1.7444	0.095
32.6676	1.7416	1.7911	1.7719	1.7783	1.7453	1.7428	1.7619	1.7275	1.7288	0.0952	0.0955	0.0956	32.6675	1.7745	1.827	1.8008	1.7622	1.7447	1.7501	1.6888	1.7027	1.7248	0.1041	0.0959	0.0952	32.6679	1.7618	1.8918	1.8281	1.7479	1.7638	1.7812	1.7421	1.7718	1.7742	0.0951	0.0954	0.0952	32.6676	1.7294	1.7728	1.777	1.6871	1.6792	1.6688	1.7461	1.6764	1.7445	0.095
32.8342	1.7421	1.7927	1.772	1.7778	1.7446	1.741	1.7589	1.7257	1.727	0.0952	0.0956	0.0957	32.8342	1.7747	1.8246	1.7929	1.762	1.744	1.7447	1.6883	1.7038	1.7242	0.1041	0.0958	0.0953	32.8345	1.7568	1.8899	1.8273	1.7453	1.7631	1.7796	1.7421	1.7708	1.7742	0.0951	0.0955	0.0952	32.8342	1.7283	1.7748	1.7756	1.6866	1.6811	1.6671	1.7479	1.6731	1.7425	0.095
33.0009	1.7419	1.7942	1.7711	1.7744	1.7472	1.7403	1.7604	1.7263	1.727	0.0952	0.0955	0.0956	33.0009	1.7757	1.8281	1.8008	1.7639	1.7443	1.7501	1.6889	1.7015	1.7243	0.1039	0.0961	0.0953	33.0012	1.7585	1.8909	1.8268	1.7483	1.7664	1.7797	1.7415	1.7707	1.7764	0.0951	0.0954	0.0952	33.0009	1.7274	1.7773	1.7784	1.6879	1.6807	1.67	1.7469	1.6757	1.7441	0.095
33.1676	1.7388	1.7924	1.768	1.7701	1.7467	1.7362	1.7595	1.7237	1.7277	0.0952	0.0955	0.0957	33.1676	1.7764	1.8313	1.7961	1.7639	1.7468	1.7478	1.6883	1.7053	1.724	0.1038	0.096	0.0952	33.1679	1.7539	1.8903	1.8265	1.7465	1.7657	1.7792	1.7418	1.772	1.7753	0.095	0.0953	0.0952	33.1676	1.7318	1.7824	1.7817	1.6928	1.6835	1.674	1.7499	1.6788	1.7446	0.095
33.3342	1.7422	1.7911	1.7669	1.7697	1.7501	1.7354	1.7603	1.7253	1.7281	0.0953	0.0955	0.0957	33.3342	1.7752	1.8317	1.7965	1.7642	1.747	1.7467	1.6913	1.7055	1.7236	0.1022	0.096	0.0952	33.3345	1.7525	1.8896	1.8207	1.7474	1.771	1.7751	1.7401	1.7711	1.7735	0.095	0.0954	0.0952	33.3342	1.7327	1.7817	1.7809	1.6953	1.6857	1.6732	1.7478	1.6747	1.7444	0.0951
33.5009	1.7438	1.7909	1.7677	1.7683	1.7526	1.7334	1.7599	1.7254	1.7321	0.0954	0.0955	0.0957	33.5009	1.7754	1.8309	1.7894	1.7647	1.7475	1.7417	1.6916	1.7038	1.7236	0.1029	0.0959	0.0952	33.5012	1.7529	1.8921	1.8264	1.749	1.7722	1.777	1.7418	1.7725	1.7733	0.0949	0.0955	0.0952	33.5009	1.7332	1.7836	1.7802	1.6989	1.687	1.6726	1.7497	1.6748	1.7457	0.095
33.6676	1.745	1.7898	1.7675	1.7691	1.7508	1.7329	1.7581	1.7247	1.7333	0.0953	0.0955	0.0956	33.6676	1.7768	1.8309	1.7896	1.767	1.7472	1.7405	1.6898	1.7043	1.7243	0.1039	0.0959	0.0952	33.6679	1.7519	1.8918	1.824	1.7501	1.7666	1.7784	1.7449	1.7734	1.7777	0.0951	0.0954	0.0951	33.6676	1.7353	1.7888	1.7853	1.7023	1.6851	1.675	1.7504	1.6776	1.7463	0.0948
33.8343	1.745	1.7902	1.7657	1.767	1.7497	1.7317	1.7586	1.7249	1.7327	0.0953	0.0955	0.0956	33.8342	1.7786	1.8331	1.7936	1.7676	1.7488	1.7393	1.6925	1.7045	1.7246	0.104	0.0959	0.0953	33.8346	1.7501	1.8923	1.8226	1.7502	1.769	1.7764	1.743	1.7731	1.7788	0.0951	0.0954	0.0952	33.8343	1.7343	1.7922	1.7857	1.7033	1.6865	1.6794	1.7491	1.6778	1.7462	0.095
34.0009	1.7428	1.7861	1.7644	1.7648	1.7457	1.7274	1.7573	1.7226	1.736	0.0952	0.0955	0.0956	34.0009	1.7801	1.8267	1.7867	1.7662	1.7435	1.7337	1.6913	1.7048	1.7255	0.104	0.0959	0.0952	34.0012	1.7498	1.8891	1.8214	1.7504	1.7657	1.7791	1.7425	1.7716	1.7757	0.0951	0.0954	0.0951	34.0009	1.7359	1.7919	1.785	1.7051	1.6863	1.6734	1.7505	1.6772	1.746	0.0949
34.1676	1.7418	1.7846	1.763	1.7644	1.743	1.7262	1.7553	1.723	1.7363	0.0953	0.0954	0.0956	34.1676	1.7793	1.8308	1.7906	1.7651	1.7447	1.7359	1.6902	1.7049	1.7264	0.1039	0.0958	0.0951	34.1679	1.7506	1.8921	1.8207	1.7518	1.7659	1.774	1.744	1.7725	1.7744	0.095	0.0955	0.0952	34.1676	1.7391	1.7958	1.7904	1.7083	1.6878	1.6796	1.751	1.6785	1.7475	0.0949
34.3343	1.7384	1.7813	1.7606	1.7633	1.7393	1.723	1.7568	1.7232	1.7363	0.0952	0.0955	0.0955	34.3343	1.7771	1.8327	1.7922	1.7624	1.7432	1.7374	1.691	1.7027	1.7281	0.1038	0.0958	0.0953	34.3346	1.7511	1.8926	1.8189	1.7513	1.767	1.7744	1.7449	1.773	1.7761	0.095	0.0955	0.0951	34.3343	1.741	1.7979	1.7855	1.7093	1.6854	1.6784	1.7525	1.6796	1.7478	0.0949
34.5009	1.7372	1.7803	1.7618	1.7655	1.7404	1.7237	1.7571	1.7211	1.7361	0.0952	0.0954	0.0957	34.5009	1.7766	1.8296	1.7874	1.7614	1.7404	1.7319	1.6885	1.7056	1.7267	0.1034	0.0959	0.0952	34.5012	1.7507	1.8917	1.8177	1.7487	1.764	1.7773	1.7417	1.7727	1.778	0.095	0.0955	0.0951	34.5009	1.7442	1.8021	1.7888	1.7122	1.6881	1.6795	1.7515	1.6753	1.7483	0.095
34.6676	1.7349	1.7805	1.7633	1.7652	1.7388	1.7216	1.7554	1.7215	1.7345	0.0952	0.0955	0.0955	34.6676	1.7767	1.8299	1.7866	1.7608	1.7391	1.7315	1.6885	1.7054	1.7281	0.1037	0.0959	0.0953	34.6679	1.7493	1.8908	1.8119	1.7464	1.7638	1.7727	1.7421	1.7735	1.7751	0.095	0.0954	0.0951	34.6676	1.7465	1.8013	1.7876	1.7155	1.6878	1.6783	1.7535	1.679	1.7488	0.0951
34.8343	1.7349	1.7801	1.7622	1.7676	1.7368	1.7204	1.7559	1.7191	1.7344	0.0952	0.0954	0.0956	34.8343	1.7774	1.8332	1.7924	1.7597	1.7397	1.7314	1.6866	1.7042	1.7236	0.1034	0.0959	0.0952	34.8346	1.7527	1.8938	1.8103	1.7493	1.7642	1.774	1.7436	1.7759	1.7756	0.0951	0.0955	0.0953	34.8343	1.747	1.8047	1.7915	1.7167	1.6889	1.6839	1.7527	1.6785	1.7496	0.095
35.0009	1.734	1.7795	1.7616	1.7694	1.7344	1.7176	1.7564	1.7194	1.736	0.0952	0.0954	0.0956	35.0009	1.7761	1.8326	1.7851	1.7585	1.7365	1.7302	1.6888	1.7049	1.7223	0.1035	0.0959	0.0952	35.0013	1.752	1.8925	1.8096	1.7485	1.7586	1.7741	1.7428	1.7761	1.7757	0.095	0.0955	0.0953	35.0013	1.7482	1.8061	1.7886	1.7194	1.6867	1.6804	1.7546	1.6787	1.748	0.0949
35.1676	1.7335	1.7778	1.7576	1.773	1.7322	1.7144	1.7579	1.7206	1.7357	0.0953	0.0955	0.0957	35.1676	1.7743	1.8311	1.7846	1.7566	1.7301	1.7281	1.6866	1.7033	1.7229	0.1031	0.0958	0.0952	35.1679	1.7545	1.8949	1.8059	1.7489	1.7623	1.7703	1.7415	1.7726	1.776	0.095	0.0954	0.0951	35.1679	1.7505	1.8074	1.7904	1.7184	1.6843	1.6811	1.7537	1.679	1.7477	0.0949
35.3343	1.7308	1.7799	1.7627	1.7744	1.7312	1.7123	1.7611	1.724	1.7327	0.0953	0.0954	0.0957	35.3343	1.7758	1.8326	1.7876	1.7584	1.7327	1.7262	1.689	1.7039	1.7226	0.1041	0.0959	0.0953	35.3346	1.7558	1.8951	1.8053	1.7506	1.7603	1.7675	1.7424	1.7749	1.7771	0.095	0.0954	0.0952	35.3346	1.7515	1.8065	1.7926	1.7208	1.6852	1.684	1.7547	1.6779	1.747	0.095
35.501	1.7315	1.7815	1.7595	1.7749	1.7298	1.7114	1.761	1.7223	1.7308	0.0953	0.0954	0.0956	35.501	1.7753	1.8376	1.7872	1.7586	1.7331	1.728	1.6885	1.7068	1.7249	0.1036	0.0958	0.0952	35.5013	1.759	1.8944	1.8131	1.7512	1.7637	1.7678	1.7443	1.7735	1.7792	0.0951	0.0954	0.0952	35.5013	1.7549	1.8069	1.7987	1.7222	1.6852	1.6916	1.757	1.6769	1.7491	0.095
35.6676	1.7318	1.7827	1.7577	1.7761	1.7278	1.7076	1.7578	1.7253	1.7328	0.0953	0.0955	0.0957	35.6676	1.7738	1.8352	1.7865	1.7576	1.7302	1.7233	1.6885	1.7051	1.7231	0.1039	0.0959	0.0952	35.6679	1.7581	1.8913	1.7995	1.7502	1.7596	1.7662	1.7441	1.776	1.7811	0.095	0.0955	0.0952	35.6679	1.7575	1.8098	1.7978	1.7245	1.6861	1.6896	1.7577	1.6788	1.7509	0.0949
35.8343	1.7321	1.7799	1.7571	1.7757	1.7237	1.7036	1.758	1.7267	1.7272	0.0952	0.0954	0.0955	35.8343	1.7727	1.8373	1.7861	1.7572	1.7279	1.7196	1.686	1.7067	1.7205	0.1037	0.0958	0.0952	35.8346	1.7605	1.891	1.7942	1.7522	1.7625	1.7627	1.7429	1.7774	1.7828	0.0951	0.0954	0.0951	35.8346	1.7564	1.8107	1.7993	1.724	1.6846	1.6911	1.7607	1.6797	1.7523	0.0948
36.001	1.733	1.7805	1.7573	1.7749	1.7237	1.703	1.7573	1.7246	1.7293	0.0953	0.0955	0.0957	36.001	1.773	1.841	1.7856	1.7579	1.7282	1.7186	1.6883	1.7037	1.7202	0.1038	0.0959	0.0952	36.0013	1.7572	1.8914	1.7941	1.7514	1.7579	1.7613	1.7411	1.7737	1.7829	0.095	0.0954	0.0953	36.0013	1.7586	1.8096	1.805	1.725	1.6833	1.6925	1.7593	1.6784	1.7527	0.0948
36.1676	1.735	1.7796	1.7552	1.7756	1.7228	1.7017	1.755	1.7215	1.7265	0.0953	0.0954	0.0956	36.1676	1.776	1.8429	1.7861	1.7597	1.7291	1.7206	1.6928	1.7079	1.7198	0.1039	0.0959	0.0952	36.1679	1.758	1.8911	1.7913	1.7527	1.7569	1.7623	1.7428	1.7745	1.7846	0.095	0.0955	0.0953	36.168	1.7589	1.8122	1.8066	1.7243	1.6843	1.6964	1.7609	1.6779	1.7541	0.0949
36.3343	1.7374	1.7764	1.7503	1.7744	1.719	1.6977	1.7549	1.7235	1.724	0.0953	0.0955	0.0956	36.3343	1.7763	1.8449	1.7819	1.7622	1.7251	1.7136	1.6908	1.7055	1.7169	0.1033	0.0958	0.0952	36.3346	1.7612	1.8897	1.7839	1.7555	1.7564	1.757	1.7427	1.7741	1.7829	0.095	0.0955	0.0952	36.3346	1.7583	1.8132	1.8097	1.7257	1.68	1.7014	1.7615	1.6792	1.7548	0.095
36.501	1.7383	1.7773	1.7498	1.7729	1.7194	1.6958	1.7538	1.7209	1.7194	0.0952	0.0955	0.0956	36.501	1.7793	1.8433	1.78	1.7627	1.7239	1.7135	1.6938	1.7053	1.7149	0.1034	0.0958	0.0952	36.5013	1.7596	1.8882	1.7854	1.7561	1.7582	1.7586	1.7452	1.7764	1.7802	0.095	0.0955	0.0953	36.5013	1.7575	1.8115	1.8097	1.7245	1.6799	1.6996	1.7633	1.6777	1.7571	0.0949
36.6676	1.7405	1.7774	1.7504	1.7732	1.7171	1.6927	1.7551	1.7222	1.7182	0.0952	0.0955	0.0956	36.6681	1.7788	1.8449	1.7767	1.7635	1.7209	1.7066	1.6924	1.7037	1.7138	0.1032	0.096	0.0952	36.668	1.7601	1.8881	1.7857	1.7587	1.757	1.7775	1.7439	1.7734	1.7818	0.095	0.0953	0.0952	36.668	1.7609	1.8123	1.8119	1.728	1.6822	1.702	1.7645	1.6773	1.756	0.0949
36.8343	1.739	1.7754	1.7459	1.7713	1.7132	1.6883	1.7528	1.717	1.7173	0.0953	0.0955	0.0956	36.8347	1.7792	1.8462	1.7816	1.765	1.7205	1.7088	1.6937	1.7047	1.7146	0.1031	0.0959	0.0952	36.8346	1.757	1.8869	1.7877	1.7586	1.7576	1.7574	1.7426	1.7714	1.7787	0.095	0.0955	0.0952	36.8346	1.7599	1.8107	1.8188	1.7256	1.679	1.7051	1.7649	1.6743	1.7594	0.0948
37.001	1.7397	1.7758	1.7474	1.7707	1.712	1.6878	1.7522	1.7149	1.7129	0.0952	0.0955	0.0956	37.0014	1.7816	1.8443	1.7786	1.7653	1.7187	1.7076	1.6956	1.7059	1.712	0.1032	0.0958	0.0952	37.0013	1.7595	1.8896	1.7807	1.7625	1.7602	1.7559	1.7443	1.7733	1.7819	0.0949	0.0955	0.0951	37.0013	1.7612	1.8123	1.8217	1.7273	1.6814	1.705	1.7692	1.6802	1.7603	0.0949
37.1677	1.7394	1.7735	1.7439	1.769	1.7089	1.6818	1.7506	1.7119	1.708	0.0952	0.0955	0.0955	37.1681	1.7835	1.8505	1.7801	1.7661	1.7187	1.7046	1.6944	1.7026	1.7069	0.1033	0.0958	0.0953	37.168	1.7616	1.8844	1.7718	1.761	1.7582	1.7528	1.7435	1.7731	1.7787	0.095	0.0955	0.0952	37.168	1.7602	1.814	1.8256	1.7283	1.6823	1.7121	1.7662	1.6765	1.7629	0.0948
37.3343	1.7406	1.775	1.7435	1.769	1.7059	1.6811	1.7515	1.7115	1.7081	0.0951	0.0955	0.0955	37.3348	1.7841	1.8503	1.7798	1.7679	1.7171	1.7058	1.6965	1.7015	1.7063	0.1034	0.0959	0.0952	37.3346	1.76	1.882	1.7753	1.7596	1.7563	1.7561	1.7436	1.7721	1.7775	0.0949	0.0954	0.0951	37.3346	1.7606	1.8152	1.8289	1.7292	1.6804	1.7108	1.7708	1.6771	1.7621	0.0948
37.501	1.7399	1.7708	1.7402	1.7666	1.7039	1.6777	1.7513	1.7115	1.7029	0.0953	0.0955	0.0957	37.5014	1.788	1.8514	1.7757	1.7682	1.7146	1.7023	1.6963	1.7006	1.7035	0.1026	0.096	0.0952	37.5013	1.758	1.8855	1.7717	1.7605	1.7568	1.7519	1.7434	1.7725	1.78	0.095	0.0954	0.0952	37.5013	1.7623	1.8138	1.8319	1.7295	1.6844	1.7161	1.7712	1.6781	1.762	0.095
37.6677	1.74	1.7729	1.7414	1.7663	1.7023	1.6791	1.7515	1.7101	1.7028	0.0952	0.0955	0.0956	37.6681	1.7847	1.85	1.7737	1.767	1.7113	1.6978	1.6956	1.6974	1.7013	0.1029	0.0958	0.0952	37.668	1.7598	1.8876	1.7635	1.7605	1.756	1.75	1.7434	1.7712	1.7762	0.095	0.0954	0.0953	37.668	1.7642	1.8151	1.8375	1.7303	1.684	1.719	1.7756	1.6763	1.7636	0.0949
37.8343	1.7384	1.7702	1.7382	1.7655	1.6986	1.6731	1.7496	1.7062	1.7005	0.0952	0.0954	0.0956	37.8348	1.7839	1.8506	1.7783	1.7678	1.7094	1.6974	1.6929	1.6984	1.7005	0.103	0.0959	0.0952	37.8347	1.7591	1.8791	1.7651	1.7582	1.7559	1.7508	1.7412	1.769	1.7749	0.095	0.0954	0.0951	37.8347	1.7611	1.8157	1.8376	1.7299	1.6848	1.7194	1.7765	1.6778	1.7647	0.095
38.001	1.7409	1.7681	1.7329	1.7645	1.6944	1.6688	1.7493	1.7044	1.697	0.0952	0.0954	0.0956	38.0014	1.7838	1.8443	1.7737	1.7687	1.7071	1.6946	1.6939	1.6971	1.6955	0.1028	0.0958	0.0953	38.0013	1.7603	1.8872	1.7664	1.758	1.7588	1.7501	1.7423	1.7681	1.7715	0.095	0.0955	0.0952	38.0013	1.7635	1.814	1.838	1.7327	1.6856	1.723	1.7776	1.6785	1.7623	0.0949
38.1677	1.7404	1.7668	1.7302	1.7639	1.6926	1.6665	1.7497	1.7012	1.6942	0.0952	0.0955	0.0955	38.1681	1.7842	1.8468	1.7741	1.7681	1.7033	1.6927	1.6936	1.6965	1.6967	0.1028	0.096	0.0952	38.168	1.76	1.8796	1.765	1.7575	1.7557	1.7484	1.7427	1.7679	1.7728	0.095	0.0955	0.0952	38.168	1.7655	1.811	1.8373	1.7309	1.687	1.7233	1.7762	1.6766	1.7644	0.0948
38.3343	1.7392	1.7672	1.7317	1.7617	1.6893	1.6625	1.7507	1.6986	1.6904	0.0952	0.0954	0.0956	38.3348	1.784	1.8405	1.7708	1.7673	1.7009	1.6888	1.6927	1.6941	1.6908	0.1025	0.0959	0.0952	38.3347	1.7602	1.8778	1.7636	1.7571	1.7533	1.7468	1.7434	1.7674	1.7689	0.0949	0.0954	0.0952	38.3347	1.7685	1.8136	1.8404	1.7332	1.6912	1.7292	1.7799	1.6776	1.7644	0.0949
38.501	1.7403	1.7654	1.7308	1.7623	1.6876	1.661	1.7526	1.6988	1.6879	0.0952	0.0954	0.0955	38.5015	1.7833	1.8396	1.7707	1.7678	1.7017	1.689	1.6913	1.6929	1.6893	0.1029	0.0958	0.0952	38.5013	1.7604	1.8862	1.7508	1.7562	1.7539	1.744	1.7444	1.7666	1.767	0.0949	0.0954	0.0951	38.5013	1.7708	1.8148	1.8434	1.7342	1.6909	1.7322	1.7814	1.6759	1.7661	0.0949
38.6677	1.7408	1.7658	1.7302	1.7608	1.6861	1.6577	1.7515	1.6961	1.6852	0.0952	0.0954	0.0956	38.6681	1.783	1.8483	1.7682	1.7674	1.7	1.6887	1.6916	1.692	1.6877	0.1031	0.0958	0.0952	38.668	1.7601	1.877	1.7518	1.757	1.7521	1.7437	1.7426	1.7663	1.7662	0.095	0.0955	0.0953	38.668	1.7719	1.8167	1.8459	1.736	1.6917	1.7356	1.7813	1.6769	1.7657	0.0949
38.8343	1.7422	1.7675	1.7302	1.7609	1.6846	1.6539	1.7513	1.6961	1.6822	0.0952	0.0955	0.0956	38.8348	1.7827	1.8428	1.7686	1.767	1.6937	1.6841	1.692	1.6881	1.683	0.1027	0.0958	0.0952	38.8347	1.7582	1.8737	1.7382	1.7585	1.7511	1.7425	1.743	1.765	1.7669	0.0949	0.0954	0.0952	38.8347	1.7777	1.8149	1.8463	1.7365	1.6925	1.7373	1.7826	1.6766	1.7675	0.0949
39.001	1.7423	1.7647	1.7275	1.7593	1.6803	1.6486	1.751	1.6935	1.6776	0.0951	0.0955	0.0956	39.0015	1.7814	1.8526	1.7667	1.7665	1.6947	1.683	1.6923	1.6887	1.6821	0.1031	0.0959	0.0952	39.0013	1.7586	1.8736	1.7185	1.7595	1.7496	1.7394	1.7438	1.7624	1.7612	0.095	0.0955	0.0952	39.0014	1.7818	1.8133	1.8455	1.7366	1.6943	1.7431	1.782	1.6759	1.7686	0.0948
39.1677	1.7418	1.7637	1.7274	1.7578	1.6761	1.6437	1.7502	1.6921	1.6748	0.0952	0.0955	0.0956	39.1681	1.7836	1.8471	1.7646	1.7666	1.6897	1.68	1.6942	1.6878	1.6809	0.1025	0.0959	0.0953	39.168	1.7539	1.8766	1.5741	1.7568	1.7478	1.7399	1.744	1.7619	1.761	0.0949	0.0955	0.0953	39.168	1.7839	1.8146	1.8456	1.7395	1.6968	1.7478	1.7842	1.6812	1.7676	0.0949
39.3344	1.7405	1.764	1.7273	1.7562	1.6754	1.6426	1.7481	1.69	1.671	0.0951	0.0954	0.0955	39.3348	1.782	1.8494	1.762	1.7651	1.6901	1.6772	1.6914	1.6844	1.6778	0.1025	0.0959	0.0953	39.3347	1.7546	1.8751	1.5711	1.7573	1.7474	1.7374	1.743	1.7597	1.7584	0.0949	0.0955	0.0953	39.3347	1.7851	1.8171	1.8455	1.7402	1.698	1.7478	1.7846	1.6816	1.7664	0.0947
													39.5015	1.7855	1.8578	1.7632	1.7656	1.6876	1.6773	1.6931	1.6846	1.6745	0.1024	0.0958	0.0953	39.5014	1.7562	1.8716	1.5827	1.7601	1.7492	1.7367	1.7432	1.7564	1.758	0.0949	0.0955	0.0952	39.5014	1.7871	1.8157	1.8431	1.7424	1.6978	1.749	1.7849	1.678	1.765	0.0947
													39.6681	1.7833	1.8652	1.7641	1.7648	1.6838	1.6746	1.6902	1.6813	1.673	0.1027	0.0958	0.0952	39.668	1.7542	1.8712	1.5904	1.7571	1.7442	1.737	1.743	1.7551	1.7582	0.0949	0.0953	0.0952	39.668	1.7894	1.8188	1.8444	1.7434	1.7004	1.7503	1.7859	1.6803	1.764	0.0946
													39.8348	1.7828	1.8604	1.7624	1.7639	1.6829	1.671	1.6913	1.6805	1.6691	0.1026	0.0958	0.0952	39.8347	1.7564	1.8814	1.5908	1.7574	1.742	1.7342	1.7389	1.754	1.756	0.0951	0.0955	0.0953	39.8347	1.7933	1.8175	1.8423	1.7459	1.7029	1.75	1.7841	1.6776	1.7671	0.0947
													40.0015	1.7821	1.8457	1.7616	1.7634	1.6832	1.6721	1.691	1.6781	1.6696	0.1025	0.0958	0.0952	40.0014	1.7548	1.8683	1.5932	1.753	1.7596	1.7334	1.7403	1.7548	1.7548	0.0949	0.0955	0.0953	40.0014	1.7948	1.8198	1.8387	1.7466	1.7031	1.7529	1.7867	1.6778	1.7669	0.0948
													40.1682	1.7832	1.8455	1.7586	1.764	1.6779	1.6668	1.6904	1.6751	1.6663	0.103	0.0959	0.0953	40.1681	1.7572	1.8738	1.5976	1.7559	1.7379	1.733	1.7415	1.7529	1.7502	0.095	0.0955	0.0953	40.1681	1.7987	1.822	1.8476	1.7485	1.7046	1.7545	1.7849	1.6736	1.7675	0.0947
													40.3348	1.7801	1.8457	1.7603	1.7642	1.6746	1.6662	1.6893	1.6748	1.6661	0.103	0.0958	0.0952	40.3347	1.7559	1.8677	1.5984	1.7514	1.7361	1.7327	1.7384	1.7529	1.7513	0.0949	0.0955	0.0952	40.3347	1.8001	1.8225	1.8386	1.7483	1.7056	1.7549	1.7839	1.6741	1.7661	0.0947
													40.5015	1.7799	1.8454	1.7587	1.7886	1.673	1.6631	1.6894	1.6752	1.6643	0.1037	0.0959	0.0952	40.5014	1.7559	1.8645	1.6074	1.7529	1.7347	1.7353	1.7399	1.7493	1.7521	0.0949	0.0954	0.0952	40.5014	1.8036	1.8244	1.8377	1.748	1.7102	1.7596	1.7871	1.6744	1.7694	0.0947
													40.6682	1.7795	1.847	1.7607	1.7524	1.671	1.6625	1.685	1.6724	1.6634	0.1025	0.0959	0.0952	40.6681	1.7577	1.8664	1.6048	1.7547	1.7324	1.7327	1.7371	1.7496	1.7478	0.095	0.0955	0.0952	40.6681	1.8067	1.8259	1.835	1.752	1.7093	1.7617	1.7878	1.6717	1.7677	0.0947
													40.8349	1.7842	1.8515	1.7613	1.7556	1.6694	1.6591	1.6875	1.6709	1.6632	0.1019	0.0959	0.0952	40.8347	1.7594	1.8565	1.614	1.7548	1.7302	1.7348	1.7337	1.7476	1.7452	0.095	0.0955	0.0953	40.8347	1.808	1.8275	1.835	1.752	1.7104	1.7642	1.7888	1.6738	1.7699	0.0946
													41.0015	1.7773	1.8464	1.7618	1.7567	1.6672	1.6583	1.6865	1.67	1.6624	0.1018	0.0957	0.0951	41.0014	1.7574	1.8582	1.6075	1.7583	1.7287	1.7331	1.7339	1.7498	1.7456	0.095	0.0956	0.0952	41.0014	1.8106	1.8281	1.8353	1.7514	1.7121	1.7643	1.7893	1.6704	1.7661	0.0947
													41.1682	1.7765	1.8467	1.7593	1.7556	1.663	1.6561	1.685	1.6691	1.662	0.102	0.0958	0.0952	41.1681	1.7569	1.8687	1.6151	1.7543	1.7279	1.7333	1.7317	1.7472	1.7439	0.0949	0.0955	0.0952	41.1681	1.8156	1.8299	1.8325	1.754	1.7095	1.7673	1.7899	1.6688	1.7703	0.0947
													41.3349	1.7779	1.8552	1.7602	1.7584	1.6614	1.6556	1.6863	1.6696	1.6617	0.1017	0.0958	0.0952	41.3348	1.7592	1.8518	1.6214	1.756	1.7247	1.7317	1.7323	1.7476	1.7473	0.0949	0.0954	0.0952	41.3348	1.8158	1.8294	1.8315	1.7547	1.7092	1.7694	1.7904	1.6715	1.771	0.0946
													41.5015	1.7777	1.8501	1.759	1.7561	1.6592	1.6534	1.6852	1.6681	1.6606	0.1027	0.0959	0.0952	41.5014	1.7584	1.8528	1.6098	1.7557	1.7273	1.7287	1.73	1.7464	1.7458	0.095	0.0955	0.0952	41.5014	1.8187	1.8295	1.8357	1.7547	1.7113	1.7682	1.7906	1.67	1.7715	0.0946
													41.6682	1.7783	1.851	1.7596	1.7562	1.6571	1.6529	1.683	1.6675	1.6598	0.102	0.0957	0.0952	41.6681	1.7564	1.8507	1.6214	1.7525	1.7381	1.7296	1.7301	1.7456	1.7433	0.0949	0.0954	0.0953	41.6681	1.8221	1.83	1.8373	1.7541	1.7111	1.77	1.791	1.6659	1.7673	0.0947
													41.8349	1.777	1.8521	1.7612	1.7564	1.6539	1.6528	1.6844	1.6672	1.6623	0.1022	0.0959	0.0952	41.8348	1.7595	1.8506	1.6169	1.7527	1.7178	1.7265	1.7276	1.7436	1.7415	0.095	0.0955	0.0952	41.8348	1.824	1.832	1.8309	1.7544	1.7141	1.7735	1.7926	1.6684	1.7702	0.0947
													42.0016	1.7768	1.8536	1.7588	1.757	1.6508	1.6501	1.6828	1.6652	1.6615	0.1023	0.0959	0.0951	42.0015	1.7599	1.8522	1.6193	1.7539	1.7222	1.7248	1.7288	1.7427	1.7426	0.0949	0.0954	0.0952	42.0014	1.8247	1.834	1.8373	1.7536	1.7147	1.7739	1.7933	1.6663	1.77	0.0946
													42.1682	1.7759	1.852	1.758	1.7566	1.6491	1.6466	1.6841	1.6667	1.6622	0.102	0.0959	0.0953	42.1681	1.7608	1.822	1.6206	1.7537	1.7341	1.7242	1.7274	1.7413	1.7418	0.0948	0.0954	0.0951	42.1681	1.8267	1.8343	1.8334	1.7531	1.7134	1.7755	1.7902	1.6681	1.7685	0.0947
													42.3349	1.7788	1.8526	1.7568	1.7582	1.6464	1.6444	1.6834	1.6648	1.6621	0.1022	0.0959	0.0953	42.3348	1.7626	1.8197	1.6242	1.7526	1.7169	1.7212	1.7258	1.7411	1.7409	0.095	0.0955	0.0952	42.3348	1.8276	1.8355	1.8315	1.752	1.7139	1.773	1.7921	1.6684	1.7702	0.0947
													42.5016	1.7761	1.8536	1.7583	1.7514	1.6432	1.6419	1.6808	1.6648	1.6635	0.1024	0.0958	0.0952	42.5015	1.763	1.8216	1.6276	1.7514	1.7157	1.7205	1.7268	1.7406	1.7413	0.0949	0.0955	0.0952	42.5014	1.8294	1.8377	1.8348	1.7518	1.7147	1.7763	1.7909	1.6677	1.7701	0.0947
													42.6682	1.7768	1.8543	1.7565	1.7527	1.6413	1.6388	1.6836	1.6641	1.6617	0.1021	0.0958	0.0952	42.6681	1.7637	1.809	1.6268	1.7489	1.7151	1.7169	1.7274	1.7382	1.7416	0.0949	0.0955	0.0952	42.6681	1.8304	1.8408	1.8365	1.7515	1.7145	1.7786	1.7935	1.6703	1.7712	0.0947
													42.8349	1.7766	1.8539	1.7582	1.7515	1.64	1.6372	1.6818	1.6632	1.6642	0.1018	0.0958	0.0952	42.8348	1.7646	1.8069	1.632	1.748	1.7112	1.7157	1.7268	1.7369	1.7387	0.0949	0.0954	0.0951	42.8348	1.8315	1.8402	1.8391	1.7498	1.7132	1.7799	1.7951	1.6768	1.7714	0.0946
													43.0016	1.7787	1.8549	1.7565	1.7528	1.6372	1.6337	1.6845	1.664	1.6654	0.1024	0.0958	0.0951	43.0015	1.7649	1.8056	1.64	1.7471	1.7099	1.7138	1.7269	1.7385	1.7373	0.0948	0.0954	0.0952	43.0015	1.832	1.8408	1.8426	1.7492	1.7124	1.7805	1.7934	1.6597	1.7722	0.0948
													43.1682	1.7782	1.8554	1.7587	1.7519	1.6324	1.6319	1.6826	1.6629	1.666	0.1024	0.0958	0.0952	43.1681	1.765	1.806	1.6429	1.747	1.7136	1.7113	1.7236	1.7362	1.7376	0.0949	0.0954	0.0952	43.1681	1.8327	1.8399	1.8434	1.7501	1.7135	1.7802	1.7922	1.6616	1.7697	0.0945
													43.3349	1.778	1.857	1.7565	1.7511	1.628	1.6297	1.683	1.6619	1.6661	0.1022	0.0958	0.0952	43.3348	1.7674	1.8149	1.6378	1.7452	1.7081	1.709	1.7251	1.7346	1.7381	0.0949	0.0954	0.0952	43.3348	1.8351	1.8407	1.8457	1.7497	1.709	1.7824	1.7948	1.6634	1.7715	0.0945
													43.5016	1.7795	1.8558	1.759	1.7501	1.6275	1.6282	1.6814	1.6623	1.669	0.1017	0.0958	0.0952	43.5015	1.7689	1.8145	1.6494	1.7448	1.7062	1.705	1.725	1.7332	1.7385	0.0949	0.0954	0.0951	43.5015	1.8349	1.8422	1.848	1.749	1.7084	1.7846	1.7935	1.6664	1.7724	0.0947
													43.6683	1.7809	1.8539	1.7581	1.7496	1.6287	1.624	1.6836	1.662	1.6707	0.102	0.0957	0.0952	43.6682	1.7709	1.8225	1.6574	1.7418	1.7073	1.7032	1.7229	1.734	1.7364	0.0949	0.0953	0.0952	43.6681	1.8367	1.8416	1.853	1.7485	1.7072	1.7826	1.795	1.6674	1.7733	0.0946
													43.8349	1.7789	1.854	1.7601	1.7479	1.6266	1.6229	1.6834	1.6625	1.6743	0.1018	0.0958	0.0951	43.8348	1.7723	1.8272	1.6644	1.7399	1.7047	1.6983	1.7229	1.731	1.7387	0.0949	0.0955	0.0951	43.8348	1.8372	1.8444	1.8496	1.7488	1.7077	1.7836	1.7959	1.6665	1.7739	0.0947
													44.0016	1.7802	1.8532	1.7575	1.7464	1.6218	1.6175	1.6819	1.6616	1.6756	0.1016	0.0959	0.0951	44.0015	1.7753	1.8305	1.6718	1.7399	1.7051	1.6948	1.7301	1.7303	1.7369	0.095	0.0953	0.0952	44.0015	1.8372	1.8409	1.849	1.7481	1.7035	1.7824	1.7946	1.6658	1.773	0.0946
													44.1683	1.7809	1.8504	1.7587	1.7443	1.6205	1.6159	1.6834	1.6612	1.6756	0.1016	0.0959	0.0951	44.1682	1.7777	1.841	1.6732	1.7386	1.7042	1.6951	1.7183	1.729	1.7384	0.0949	0.0954	0.0951	44.1682	1.8382	1.844	1.8523	1.7492	1.7042	1.7819	1.7949	1.6657	1.7726	0.0946
													44.3349	1.7806	1.8513	1.7584	1.7401	1.6184	1.6117	1.6828	1.6627	1.678	0.1017	0.0958	0.0952	44.3348	1.7794	1.8538	1.6782	1.7364	1.7046	1.6905	1.7189	1.7281	1.7435	0.0949	0.0954	0.0952	44.3348	1.8383	1.844	1.853	1.7493	1.7035	1.7823	1.7961	1.665	1.7739	0.0946
													44.5016	1.7828	1.8514	1.7587	1.7399	1.6163	1.6073	1.6853	1.6605	1.6789	0.102	0.0958	0.0951	44.5015	1.78	1.862	1.6912	1.734	1.7031	1.6894	1.7182	1.7252	1.7359	0.0949	0.0954	0.0951	44.5015	1.8389	1.8448	1.8538	1.749	1.7026	1.7803	1.7952	1.6648	1.7724	0.0946
													44.6683	1.7799	1.8529	1.7604	1.7374	1.6152	1.6048	1.6874	1.6607	1.6798	0.1021	0.0958	0.0951	44.6682	1.7811	1.8686	1.6966	1.7318	1.7012	1.6888	1.7179	1.7267	1.7335	0.0948	0.0953	0.0951	44.6682	1.84	1.8435	1.8518	1.7498	1.7006	1.7791	1.7982	1.664	1.7732	0.0946
													44.835	1.7804	1.8519	1.7611	1.7359	1.6116	1.5981	1.6886	1.6609	1.6791	0.1016	0.0958	0.0951	44.8349	1.7836	1.874	1.7042	1.7307	1.7004	1.6865	1.7198	1.7257	1.7328	0.0947	0.0954	0.0952	44.8348	1.8401	1.8438	1.8527	1.7513	1.6984	1.7795	1.7979	1.6674	1.7741	0.0947
													45.0016	1.7807	1.8557	1.7612	1.7356	1.6097	1.5928	1.6905	1.6608	1.6814	0.1017	0.0958	0.0951	45.0015	1.7834	1.8795	1.7159	1.7294	1.6996	1.6887	1.7175	1.7238	1.7319	0.0947	0.0954	0.0952	45.0015	1.8401	1.8434	1.854	1.7499	1.6962	1.7776	1.798	1.664	1.7737	0.0946
													45.1683	1.7827	1.8549	1.7629	1.7357	1.6064	1.5893	1.6931	1.6616	1.6812	0.1015	0.0958	0.0952	45.1682	1.7859	1.8836	1.7254	1.7305	1.6985	1.6876	1.7164	1.7231	1.7296	0.0949	0.0954	0.0952
													45.335	1.7838	1.8582	1.7623	1.7349	1.6065	1.5823	1.6962	1.6627	1.6816	0.102	0.0957	0.0951	45.3349	1.7861	1.8863	1.7333	1.729	1.6953	1.6876	1.7163	1.7219	1.7298	0.0948	0.0955	0.0951
													45.5016	1.7857	1.8592	1.7639	1.7333	1.6048	1.5787	1.6969	1.6619	1.681	0.1016	0.0958	0.0951	45.5015	1.788	1.8878	1.7433	1.7291	1.6927	1.6883	1.7163	1.7207	1.7279	0.0949	0.0954	0.0952
													45.6683	1.7852	1.8607	1.7632	1.732	1.6024	1.5736	1.6959	1.662	1.6814	0.1019	0.0958	0.0951	45.6682	1.7887	1.8911	1.7472	1.7276	1.6933	1.6886	1.716	1.7192	1.7281	0.0949	0.0955	0.0952
													45.835	1.7874	1.8627	1.7649	1.731	1.6002	1.5707	1.698	1.6618	1.6817	0.1015	0.0957	0.0951	45.8349	1.7898	1.8936	1.7542	1.7264	1.6929	1.6891	1.7165	1.7188	1.7304	0.0949	0.0954	0.0952
													46.0017	1.7897	1.8633	1.7654	1.7303	1.5993	1.5686	1.6978	1.6625	1.6817	0.1015	0.0957	0.0951	46.0015	1.7896	1.8929	1.7614	1.7246	1.6911	1.6895	1.7128	1.7177	1.7265	0.0948	0.0954	0.0953
													46.1683	1.7903	1.8632	1.767	1.7286	1.598	1.5696	1.7016	1.6627	1.6808	0.1017	0.0957	0.0951	46.1682	1.792	1.8929	1.7663	1.7248	1.6911	1.6898	1.7143	1.7164	1.7239	0.0949	0.0954	0.0952
													46.335	1.7909	1.8662	1.769	1.7269	1.5985	1.573	1.7012	1.6627	1.6821	0.1021	0.0958	0.0952	46.3349	1.7929	1.8936	1.7758	1.7245	1.6884	1.6916	1.7161	1.7156	1.7242	0.0948	0.0953	0.0952
													46.5017	1.7928	1.8655	1.7677	1.7256	1.5967	1.574	1.7019	1.6642	1.6798	0.1015	0.0957	0.0951	46.5016	1.7937	1.8961	1.7876	1.7236	1.6895	1.6928	1.7132	1.7127	1.7234	0.0948	0.0954	0.0952
													46.6683	1.7917	1.865	1.7675	1.7252	1.5959	1.5771	1.703	1.6644	1.681	0.1017	0.0958	0.0951	46.6682	1.7939	1.8955	1.7921	1.7215	1.6882	1.6917	1.713	1.7123	1.7253	0.0949	0.0953	0.0952
													46.835	1.7949	1.8675	1.7688	1.7256	1.5976	1.5785	1.7063	1.6659	1.681	0.1018	0.0958	0.0951	46.8349	1.7951	1.8964	1.7931	1.7201	1.6892	1.6926	1.7164	1.7134	1.7228	0.0948	0.0953	0.0951
													47.0017	1.7937	1.8678	1.7704	1.7264	1.5974	1.5816	1.7089	1.6657	1.6783	0.102	0.0958	0.0951	47.0016	1.7958	1.8966	1.8047	1.7197	1.6892	1.694	1.7146	1.712	1.7223	0.0948	0.0955	0.0951
													47.1683	1.7952	1.8697	1.772	1.7281	1.5986	1.5831	1.7117	1.6672	1.6798	0.1016	0.0958	0.0951	47.1682	1.7971	1.8973	1.808	1.7195	1.6885	1.6931	1.7151	1.7116	1.7209	0.0948	0.0954	0.0951
													47.335	1.7956	1.8679	1.7696	1.7289	1.5972	1.5833	1.7149	1.6654	1.679	0.1009	0.0957	0.095	47.3349	1.7975	1.8986	1.8143	1.7186	1.689	1.6933	1.7134	1.7109	1.7195	0.0948	0.0953	0.0951
													47.5017	1.795	1.8672	1.7697	1.7289	1.5949	1.5847	1.7154	1.6654	1.6769	0.1015	0.0958	0.0951	47.5016	1.7977	1.8977	1.8236	1.7188	1.6883	1.6936	1.7122	1.7103	1.7201	0.0949	0.0954	0.0952
													47.6684	1.797	1.8704	1.7723	1.7303	1.5996	1.587	1.7162	1.6649	1.6766	0.1022	0.0958	0.0952	47.6683	1.7987	1.8968	1.8277	1.7183	1.6879	1.694	1.7115	1.7096	1.7172	0.0948	0.0954	0.0952
													47.835	1.798	1.8699	1.771	1.7312	1.5985	1.587	1.7174	1.665	1.676	0.102	0.0958	0.0952	47.8349	1.7981	1.8976	1.8331	1.7177	1.6885	1.694	1.7109	1.7075	1.7172	0.0948	0.0955	0.0952
[truncated: 28 more columns]

## Sheet: Tab 3. A. thaliana root weight
Treatment	Initial Weight (g)	Initial and plant root Weight (g)	final weight of sample ( roots) (g)
Control-1	1.4	1.486	0.086
Control-2	1.395	1.463	0.068
Control-3	1.394	1.528	0.134
Control-4	1.395	1.463	0.068
Control-5	1.396	1.473	0.077
Control-6	1.395	1.486	0.091
SB642-1	1.337	1.379	0.042
SB642-2	1.399	1.503	0.104
SB642-3	1.395	1.475	0.08
SB642-4	1.394	1.495	0.101
SB642-5	1.396	1.459	0.063
SB642-6	1.396	1.467	0.071
SB642-7	1.395	1.472	0.077
SB642-8	1.397	1.497	0.1
SB642-9	1.393	1.505	0.112
SB642-10	1.395	1.482	0.087
SB642-11	1.392	1.473	0.081
SB642-12	1.392	1.46	0.068
DPhage-1	1.398	1.524	0.126
DPhage-2	1.395	1.49	0.095
DPhage-3	1.402	1.485	0.083
DPhage-4	1.396	1.493	0.097
DPhage-5	1.392	1.474	0.082
DPhage-6	1.396	1.49	0.094
DPhage-7	1.396	1.489	0.093
DPhage-8	1.397	1.517	0.12
DPhage-9	1.397	1.54	0.143
DPhage-10	1.4	1.478	0.078
DPhage-11	1.4	1.483	0.083
DPhage-12	1.391	1.514	0.123

## Sheet: Tab 4. B. distachyon root weigh
Treatment	Initial Weight (g)	Initial and plant root Weight (g)	final weight of sample ( roots) (g)
Control-1	1.398	1.406	0.008
Control-2	1.396	1.4	0.004
Control-3	1.399	1.4	0.001
Control-4	1.402	1.422	0.02
Control-5	1.397	1.397	0
Control-6	1.397	1.404	0.007
SB642-1	1.398	1.415	0.017
SB642-2	1.395	1.413	0.018
SB642-3	1.398	1.416	0.018
SB642-4	1.397	1.43	0.033
SB642-5	1.394	1.406	0.012
SB642-6	1.394	1.415	0.021
SB642-7	1.4	1.432	0.032
SB642-8	1.393	1.421	0.028
SB642-9	1.396	1.427	0.031
SB642-10	1.394	1.41	0.016
SB642-11	1.397	1.422	0.025
SB642-12	1.4	1.424	0.024
DPhage-1	1.396	1.413	0.017
DPhage-2	1.397	1.415	0.018
DPhage-3	1.394	1.411	0.017
DPhage-4	1.394	1.416	0.022
DPhage-5	1.398	1.421	0.023
DPhage-6	1.402	1.412	0.01
DPhage-7	1.396	1.416	0.02
DPhage-8	1.395	1.419	0.024
DPhage-9	1.399	1.423	0.024
DPhage-10	1.399	1.415	0.016
DPhage-11	1.392	1.414	0.022
DPhage-12	1.398	1.416	0.018

## Sheet: Tab 5. A. thaliana CFU data
Treatment	Dilution factor	CFU	CFU/ml
Control-1	10^-4	0	0
Control-2	10^-4	0	0
Control-3	10^-4	0	0
Control-4	10^-4	0	0
Control-5	10^-4	2	1000000
Control-6	10^-4	0	0
Control-1	10^-5	0	0
Control-2	10^-5	0	0
Control-3	10^-5	0	0
Control-4	10^-5	0	0
Control-5	10^-5	0	0
Control-6	10^-5	0	0
SB642-1.A	10^-4	86	43000000
SB642-1.B	10^-4	113	56500000
SB642-2.A	10^-4	211	105500000
SB642-2.B	10^-4	201	100500000
SB642-3.A	10^-4	154	77000000
SB642-3.B	10^-4	13	6500000
SB642-4.A	10^-4	148	74000000
SB642-4.B	10^-4	154	77000000
SB642-5.A	10^-4	119	59500000
SB642-5.B	10^-4	121	60500000
SB642-6.A	10^-4	163	81500000
SB642-6.B	10^-4	172	86000000
SB642-7.A	10^-4	133	66500000
SB642-7.B	10^-4	113	56500000
SB642-8.A	10^-4	163	81500000
SB642-8.B	10^-4	126	63000000
SB642-9.A	10^-4	176	88000000
SB642-9.B	10^-4	140	70000000
SB642-10.A	10^-4	77	38500000
SB642-10.B	10^-4	97	48500000
SB642-11.A	10^-4	162	81000000
SB642-11.B	10^-4	143	71500000
SB642-12.A	10^-4	157	78500000
SB642-12.B	10^-4	164	82000000
SB642-1.A	10^-5	18	90000000
SB642-1.B	10^-5	8	40000000
SB642-2.A	10^-5	28	140000000
SB642-2.B	10^-5	31	155000000
SB642-3.A	10^-5	12	60000000
SB642-3.B	10^-5	10	50000000
SB642-4.A	10^-5	25	125000000
SB642-4.B	10^-5	19	95000000
SB642-5.A	10^-5	24	120000000
SB642-5.B	10^-5	14	70000000
SB642-6.A	10^-5	22	110000000
SB642-6.B	10^-5	19	95000000
SB642-7.A	10^-5	10	50000000
SB642-7.B	10^-5	16	80000000
SB642-8.A	10^-5	10	50000000
SB642-8.B	10^-5	14	70000000
SB642-9.A	10^-5	19	95000000
SB642-9.B	10^-5	22	110000000
SB642-10.A	10^-5	116	580000000
SB642-10.B	10^-5	101	505000000
SB642-11.A	10^-5	15	75000000
SB642-11.B	10^-5	19	95000000
SB642-12.A	10^-5	27	135000000
SB642-12.B	10^-5	30	150000000
DPhage-1.A	10^-4	134	67000000
DPhage-1.B	10^-4	146	73000000
DPhage-2.A	10^-4	149	74500000
DPhage-2.B	10^-4	165	82500000
DPhage-3.A	10^-4	164	82000000
DPhage-3.B	10^-4	178	89000000
DPhage-4.A	10^-4	146	73000000
DPhage-4.B	10^-4	156	78000000
DPhage-5.A	10^-4	172	86000000
DPhage-5.B	10^-4	131	65500000
DPhage-6.A	10^-4	155	77500000
DPhage-6.B	10^-4	158	79000000
DPhage-7.A	10^-4	113	56500000
DPhage-7.B	10^-4	100	50000000
DPhage-8.A	10^-4	196	98000000
DPhage-8.B	10^-4	208	104000000
DPhage-9.A	10^-4	239	119500000
DPhage-9.B	10^-4	209	104500000
DPhage-10.A	10^-4	157	78500000
DPhage-10.B	10^-4	88	44000000
DPhage-11.A	10^-4	153	76500000
DPhage-11.B	10^-4	132	66000000
DPhage-12.A	10^-4	225	112500000
DPhage-12.B	10^-4	207	103500000
DPhage-1.A	10^-5	23	115000000
DPhage-1.B	10^-5	16	80000000
DPhage-2.A	10^-5	26	130000000
DPhage-2.B	10^-5	25	125000000
DPhage-3.A	10^-5	16	80000000
DPhage-3.B	10^-5	17	85000000
DPhage-4.A	10^-5	22	110000000
DPhage-4.B	10^-5	31	155000000
DPhage-5.A	10^-5	19	95000000
DPhage-5.B	10^-5	13	65000000
DPhage-6.A	10^-5	19	95000000
DPhage-6.B	10^-5	16	80000000
DPhage-7.A	10^-5	13	65000000
DPhage-7.B	10^-5	12	60000000
DPhage-8.A	10^-5	21	105000000
DPhage-8.B	10^-5	17	85000000
DPhage-9.A	10^-5	19	95000000
DPhage-9.B	10^-5	29	145000000
DPhage-10.A	10^-5	16	80000000
DPhage-10.B	10^-5	20	100000000
DPhage-11.A	10^-5	8	40000000
DPhage-11.B	10^-5	13	65000000
DPhage-12.A	10^-5	43	215000000
DPhage-12.B	10^-5	35	175000000

## Sheet: Tab 6. B. distachyon CFU data
Treatment	Dilution factor	CFU	CFU/ml
Control-1	10^-4	0	0
Control-2	10^-4	0	0
Control-3	10^-4	0	0
Control-4	10^-4	0	0
Control-5	10^-4	0	0
Control-6	10^-4	0	0
Control-1	10^-5	0	0
Control-2	10^-5	0	0
Control-3	10^-5	0	0
Control-4	10^-5	0	0
Control-5	10^-5	0	0
Control-6	10^-5	0	0
SB642-1.A	10^-4	24	12000000
SB642-1.B	10^-4	27	13500000
SB642-2.A	10^-4	38	19000000
SB642-2.B	10^-4	56	28000000
SB642-3.A	10^-4	33	16500000
SB642-3.B	10^-4	25	12500000
SB642-4.A	10^-4	74	37000000
SB642-4.B	10^-4	48	24000000
SB642-5.A	10^-4	22	11000000
SB642-5.B	10^-4	22	11000000
SB642-6.A	10^-4	18	9000000
SB642-6.B	10^-4	16	8000000
SB642-7.A	10^-4	34	17000000
SB642-7.B	10^-4	47	23500000
SB642-8.A	10^-4	36	18000000
SB642-8.B	10^-4	44	22000000
SB642-9.A	10^-4	48	24000000
SB642-9.B	10^-4	34	17000000
SB642-10.A	10^-4	69	34500000
SB642-10.B	10^-4	56	28000000
SB642-11.A	10^-4	43	21500000
SB642-11.B	10^-4	41	20500000
SB642-12.A	10^-4	50	25000000
SB642-12.B	10^-4	41	20500000
SB642-1.A	10^-5	1	5000000
SB642-1.B	10^-5	4	20000000
SB642-2.A	10^-5	3	15000000
SB642-2.B	10^-5	9	45000000
SB642-3.A	10^-5	4	20000000
SB642-3.B	10^-5	6	30000000
SB642-4.A	10^-5	5	25000000
SB642-4.B	10^-5	9	45000000
SB642-5.A	10^-5	2	10000000
SB642-5.B	10^-5	27	135000000
SB642-6.A	10^-5	0	0
SB642-6.B	10^-5	2	10000000
SB642-7.A	10^-5	4	20000000
SB642-7.B	10^-5	5	25000000
SB642-8.A	10^-5	3	15000000
SB642-8.B	10^-5	2	10000000
SB642-9.A	10^-5	9	45000000
SB642-9.B	10^-5	6	30000000
SB642-10.A	10^-5	5	25000000
SB642-10.B	10^-5	7	35000000
SB642-11.A	10^-5	6	30000000
SB642-11.B	10^-5	2	10000000
SB642-12.A	10^-5	5	25000000
SB642-12.B	10^-5	1	5000000
DPhage-1.A	10^-4	33	16500000
DPhage-1.B	10^-4	19	9500000
DPhage-2.A	10^-4	30	15000000
DPhage-2.B	10^-4	28	14000000
DPhage-3.A	10^-4	36	18000000
DPhage-3.B	10^-4	18	9000000
DPhage-4.A	10^-4	26	13000000
DPhage-4.B	10^-4	30	15000000
DPhage-5.A	10^-4	33	16500000
DPhage-5.B	10^-4	30	15000000
DPhage-6.A	10^-4	21	10500000
DPhage-6.B	10^-4	20	10000000
DPhage-7.A	10^-4	79	39500000
DPhage-7.B	10^-4	63	31500000
DPhage-8.A	10^-4	34	17000000
DPhage-8.B	10^-4	30	15000000
DPhage-9.A	10^-4	58	29000000
DPhage-9.B	10^-4	58	29000000
DPhage-10.A	10^-4	22	11000000
DPhage-10.B	10^-4	22	11000000
DPhage-11.A	10^-4	26	13000000
DPhage-11.B	10^-4	25	12500000
DPhage-12.A	10^-4	28	14000000
DPhage-12.B	10^-4	19	9500000
DPhage-1.A	10^-5	1	5000000
DPhage-1.B	10^-5	2	10000000
DPhage-2.A	10^-5	4	20000000
DPhage-2.B	10^-5	11	55000000
DPhage-3.A	10^-5	5	25000000
DPhage-3.B	10^-5	4	20000000
DPhage-4.A	10^-5	4	20000000
DPhage-4.B	10^-5	8	40000000
DPhage-5.A	10^-5	6	30000000
DPhage-5.B	10^-5	4	20000000
DPhage-6.A	10^-5	6	30000000
DPhage-6.B	10^-5	3	15000000
DPhage-7.A	10^-5	2	10000000
DPhage-7.B	10^-5	6	30000000
DPhage-8.A	10^-5	6	30000000
DPhage-8.B	10^-5	3	15000000
DPhage-9.A	10^-5	4	20000000
DPhage-9.B	10^-5	5	25000000
DPhage-10.A	10^-5	2	10000000
DPhage-10.B	10^-5	4	20000000
DPhage-11.A	10^-5	5	25000000
DPhage-11.B	10^-5	3	15000000
DPhage-12.A	10^-5	5	25000000
DPhage-12.B	10^-5	3	15000000

## Sheet: Tab 7. Biolog dphage_1 PM01
Id	PlateId	Wavelength	Actual Temperature Celsius	Target Temperature Celsius	Read At	Negative Control	L-Arabinose	N-Acetyl-DGlucosamine	D-Saccharic Acid	Succinic Acid	D-Galactose	L-Aspartic Acid	L-Proline	D-Alanine	D-Trehalose	D-Mannose	Dulcitol	D-Serine	D-Sorbitol	Glycerol	L-Fucose	D-Glucuronic Acid	D-Gluconic Acid	D,L-a-Glycerol- Phosphate	D-Xylose	L-Lactic Acid	Formic Acid	D-Mannitol	L-Glutamic Acid	D-Glucose-6 Phosphate	D-Galactonic Acid-g-Lactone	D,L-Malic Acid	D-Ribose	Tween 20	L-Rhamnose	D-Fructose	Acetic Acid	a-D-Glucose	Maltose	D-Melibiose	Thymidine	L-Asparagine	D-Aspartic Acid	D-Glucosaminic Acid	1,2-Propanediol	Tween 40	a-Keto-Glutaric Acid	a-Keto-Butyric Acid	a-Methyl-DGalactoside
9b62daea-8c41-45e2-ada3-32b3c86d514d	5d11db29-925c-4cd5-a231-300507c63116	590	28	28	2025-08-22T20:02:14.000429Z	0.132375	0.122225	0.129366	0.12743	0.12464	0.124999	0.128662	0.122632	0.127302	0.128252	0.126131	0.125865	0.133297	0.131772	0.131606	0.1376	0.142467	0.132942	0.133084	0.13394	0.129845	0.121733	0.135095	0.130487	0.128359	0.13355	0.126479	0.135043	0.131291	0.134085	0.14159	0.121478	0.129322	0.133972	0.138087	0.131235	0.127584	0.131954	0.132231	0.138251	0.132822	0.132008	0.135964	0.128444
db530c6c-b208-4b3d-bedc-8c72d16af552	5d11db29-925c-4cd5-a231-300507c63116	740	28	28	2025-08-22T20:02:30.000429Z	0.117477	0.110785	0.116429	0.115406	0.113637	0.113836	0.11629	0.11176	0.115544	0.116336	0.115158	0.116048	0.084556	0.085286	0.084601	0.088306	0.093016	0.085382	0.085918	0.085591	0.084718	0.078439	0.08846	0.085126	0.111753	0.113996	0.108898	0.11352	0.113092	0.114238	0.120936	0.105188	0.111285	0.113871	0.11646	0.114217	0.106025	0.109902	0.110262	0.115514	0.111065	0.111245	0.113764	0.107401
b614c8e5-a19f-4209-bd74-b1e9d457becd	5d11db29-925c-4cd5-a231-300507c63116	590	28	28	2025-08-22T20:22:13.000429Z	0.127546	0.120709	0.124191	0.121853	0.12585	0.121564	0.1232	0.122073	0.120487	0.122592	0.12077	0.119987	0.126514	0.125941	0.126631	0.131627	0.136262	0.127604	0.12774	0.129142	0.127512	0.123139	0.128545	0.125245	0.122989	0.128165	0.129163	0.130146	0.132178	0.129663	0.136646	0.121493	0.128015	0.127817	0.132268	0.127009	0.122907	0.125331	0.127076	0.133465	0.133592	0.129546	0.129258	0.126506
0db4b871-3dd6-49b4-96e6-a7fc7470cdb9	5d11db29-925c-4cd5-a231-300507c63116	740	28	28	2025-08-22T20:22:29.000429Z	0.113788	0.109978	0.112486	0.111389	0.114686	0.111427	0.112256	0.111602	0.110486	0.112264	0.111442	0.111773	0.07976	0.081322	0.08102	0.084466	0.088767	0.081507	0.08172	0.081921	0.082211	0.079561	0.084111	0.081054	0.108267	0.110279	0.110486	0.109615	0.113664	0.110674	0.117459	0.104892	0.110237	0.109311	0.112231	0.110461	0.10249	0.104958	0.106653	0.112215	0.111604	0.109141	0.108874	0.105982
d353922f-563e-4580-be8a-e34ad22e3361	5d11db29-925c-4cd5-a231-300507c63116	590	28	28	2025-08-22T20:42:14.000429Z	0.131731	0.12557	0.128999	0.126161	0.131398	0.125832	0.12924	0.130542	0.124466	0.126631	0.124667	0.124812	0.131525	0.130523	0.13277	0.13613	0.139364	0.132317	0.131944	0.132722	0.132205	0.126512	0.132643	0.129583	0.12789	0.131727	0.134265	0.134923	0.135745	0.133675	0.140045	0.124725	0.131914	0.131558	0.135422	0.130587	0.126612	0.128526	0.131083	0.13827	0.136422	0.133474	0.134717	0.136844
f8bc32d7-4978-4767-ba39-99c92217c9d3	5d11db29-925c-4cd5-a231-300507c63116	740	28	28	2025-08-22T20:42:30.000429Z	0.116546	0.113113	0.115527	0.114228	0.118544	0.114155	0.116168	0.116817	0.113023	0.114986	0.114009	0.114985	0.082673	0.083944	0.084922	0.0869	0.091595	0.085224	0.084338	0.08471	0.086284	0.081021	0.086339	0.083626	0.111129	0.112933	0.114084	0.11241	0.116114	0.113019	0.119489	0.10721	0.112639	0.111732	0.114151	0.112998	0.104982	0.106836	0.109168	0.115329	0.113667	0.111599	0.11309	0.112346
dcf99185-dc8f-40c5-8d8c-283e73aeab7e	5d11db29-925c-4cd5-a231-300507c63116	590	28	28	2025-08-22T21:02:14.000429Z	0.138549	0.132532	0.136296	0.132423	0.134413	0.132064	0.134094	0.131667	0.129933	0.132861	0.130989	0.131929	0.135355	0.137291	0.139498	0.143461	0.147559	0.139671	0.138974	0.139279	0.136578	0.129481	0.137946	0.133381	0.134906	0.136719	0.135789	0.141967	0.142796	0.140266	0.146852	0.131896	0.138443	0.137087	0.141125	0.138546	0.129859	0.131458	0.137826	0.145519	0.143366	0.138357	0.135942	0.143178
f5ebc84c-98ec-49aa-b6ba-bfb052229ab9	5d11db29-925c-4cd5-a231-300507c63116	740	28	28	2025-08-22T21:02:30.000429Z	0.121474	0.117405	0.120126	0.118175	0.119896	0.118174	0.118686	0.115921	0.116443	0.118744	0.117809	0.119223	0.086965	0.088707	0.088487	0.090768	0.097041	0.089239	0.088286	0.087647	0.087996	0.08243	0.090359	0.087058	0.115411	0.116348	0.113301	0.116171	0.120369	0.117066	0.123857	0.111638	0.117002	0.115505	0.117443	0.117186	0.107199	0.108678	0.113728	0.120149	0.117702	0.114877	0.114252	0.11623
ec88dabe-406f-456d-83e8-fc851f6d0b33	5d11db29-925c-4cd5-a231-300507c63116	590	28	28	2025-08-22T21:22:12.000429Z	0.150398	0.14405	0.144853	0.139903	0.136694	0.139175	0.133758	0.13212	0.133086	0.139879	0.141276	0.141977	0.143623	0.149688	0.142997	0.153957	0.157865	0.144164	0.14425	0.149529	0.138965	0.131472	0.149336	0.135582	0.1468	0.14131	0.136516	0.150561	0.149324	0.151923	0.152612	0.135489	0.142172	0.145145	0.151076	0.144434	0.131958	0.134703	0.143632	0.154665	0.150071	0.141043	0.136727	0.148264
770929e8-3be8-4475-a4b4-6ab851e5b501	5d11db29-925c-4cd5-a231-300507c63116	740	28	28	2025-08-22T21:22:28.000429Z	0.123634	0.121925	0.123345	0.122993	0.121253	0.122683	0.118718	0.116532	0.118708	0.123741	0.123801	0.12591	0.090291	0.096901	0.089555	0.09898	0.104763	0.092408	0.091666	0.09487	0.090281	0.083678	0.096838	0.087721	0.12462	0.11953	0.115349	0.120872	0.124274	0.125762	0.128204	0.11419	0.119449	0.121571	0.124092	0.12153	0.109728	0.111067	0.117098	0.124926	0.122406	0.116289	0.115142	0.12009
0a45a6f9-1721-4812-9e83-36ac0eade3c2	5d11db29-925c-4cd5-a231-300507c63116	590	28	28	2025-08-22T21:42:12.000429Z	0.154883	0.152113	0.149716	0.147056	0.137849	0.141574	0.133341	0.133952	0.132942	0.13939	0.146914	0.146926	0.145258	0.15801	0.142931	0.157446	0.162204	0.143688	0.146111	0.158847	0.138641	0.13267	0.1536	0.140306	0.152265	0.144686	0.139953	0.15168	0.158907	0.154986	0.156259	0.13736	0.14188	0.153145	0.155905	0.148495	0.13446	0.138358	0.146701	0.162081	0.161973	0.140273	0.137643	0.154326
957466ef-2830-488a-80b9-ebbf86953ce8	5d11db29-925c-4cd5-a231-300507c63116	740	28	28	2025-08-22T21:42:28.000429Z	0.126252	0.123763	0.124402	0.122129	0.123821	0.121871	0.122014	0.119535	0.119907	0.123115	0.125771	0.128778	0.092595	0.101416	0.096158	0.101899	0.106982	0.093758	0.090192	0.100218	0.092102	0.084935	0.100217	0.092638	0.125875	0.118123	0.119266	0.121026	0.126266	0.128179	0.128815	0.116455	0.119634	0.126772	0.128018	0.12397	0.113439	0.113987	0.118194	0.127982	0.130846	0.118892	0.116442	0.121361
a9e7ab99-eabf-4d97-8caa-81b1be112a7a	5d11db29-925c-4cd5-a231-300507c63116	590	28	28	2025-08-22T22:02:14.000429Z	0.164042	0.155114	0.154895	0.14474	0.141476	0.150318	0.139778	0.137783	0.133766	0.141056	0.141882	0.147059	0.147129	0.167396	0.168176	0.16572	0.168421	0.146245	0.150567	0.161766	0.156119	0.141915	0.148917	0.148445	0.159816	0.149462	0.145159	0.155562	0.16807	0.164166	0.158036	0.140787	0.143395	0.155541	0.15919	0.147424	0.206595	0.141854	0.145603	0.166225	0.168349	0.145025	0.138225	0.15337
f51b48e8-a597-4da3-9624-c4a89baa15d8	5d11db29-925c-4cd5-a231-300507c63116	740	28	28	2025-08-22T22:02:30.000429Z	0.128644	0.124939	0.131171	0.125412	0.130275	0.129196	0.129169	0.125855	0.122749	0.12603	0.123522	0.129293	0.093909	0.102279	0.119206	0.106463	0.108457	0.100363	0.097234	0.100318	0.106012	0.0925	0.096836	0.098727	0.127527	0.125154	0.124865	0.123513	0.13281	0.132177	0.133163	0.120304	0.122889	0.127994	0.128767	0.123278	0.164874	0.116351	0.123498	0.1333	0.132415	0.124471	0.118019	0.121731
767dfdd5-269e-4581-aa61-c01bb9bbde06	5d11db29-925c-4cd5-a231-300507c63116	590	28	28	2025-08-22T22:22:12.000429Z	0.171527	0.157112	0.167465	0.146503	0.205639	0.177281	0.193761	0.204694	0.141416	0.146002	0.14429	0.151143	0.193889	0.172847	0.184905	0.170014	0.172644	0.152698	0.168921	0.162769	0.179327	0.162945	0.149252	0.180889	0.165034	0.164726	0.15289	0.158567	0.195289	0.1659	0.162104	0.147084	0.149982	0.159763	0.163411	0.149807	0.217344	0.14393	0.150078	0.179954	0.178239	0.176553	0.138749	0.158516
3450cd3b-8d6c-4a11-aac3-bfe055b6465a	5d11db29-925c-4cd5-a231-300507c63116	740	28	28	2025-08-22T22:22:28.000429Z	0.129845	0.125929	0.137312	0.126739	0.169899	0.141046	0.158277	0.168717	0.129177	0.12838	0.124853	0.130875	0.123585	0.102795	0.13162	0.110156	0.107936	0.105503	0.110479	0.101321	0.12088	0.105855	0.096945	0.123552	0.129313	0.140068	0.131941	0.125176	0.156343	0.133891	0.135801	0.126275	0.127998	0.130466	0.131088	0.123962	0.169595	0.118068	0.125296	0.140078	0.136686	0.144794	0.11992	0.124031
2e899558-a564-4b8b-99d5-a1607c679ed7	5d11db29-925c-4cd5-a231-300507c63116	590	28	28	2025-08-22T22:42:12.000429Z	0.18302	0.159357	0.180079	0.160222	0.213669	0.192007	0.21561	0.208506	0.203586	0.151689	0.146323	0.156891	0.205211	0.173871	0.205577	0.170328	0.174403	0.167799	0.187861	0.162941	0.196158	0.183948	0.151681	0.204006	0.167364	0.176789	0.190388	0.161105	0.224557	0.165137	0.166548	0.169566	0.15856	0.166449	0.166496	0.155784	0.223144	0.144829	0.155877	0.203737	0.183919	0.215199	0.13875	0.173465
60abdba4-e2c2-4105-8bac-dfaf96ff1801	5d11db29-925c-4cd5-a231-300507c63116	740	28	28	2025-08-22T22:42:29.000429Z	0.141724	0.12667	0.140394	0.132518	0.17056	0.147755	0.175943	0.169439	0.166243	0.131371	0.12615	0.134302	0.13144	0.10342	0.1401	0.111553	0.107638	0.115448	0.121466	0.101288	0.131611	0.117969	0.098218	0.136515	0.1306	0.146309	0.153669	0.12644	0.175494	0.133889	0.136631	0.140858	0.133983	0.134388	0.133926	0.126511	0.171775	0.118884	0.126335	0.15289	0.142057	0.169639	0.12186	0.129168
f8ae8613-32e2-4cf7-af0a-81aeb114cd00	5d11db29-925c-4cd5-a231-300507c63116	590	28	28	2025-08-22T23:02:12.000429Z	0.183872	0.16635	0.189455	0.181186	0.238612	0.197693	0.241229	0.229913	0.216669	0.158995	0.15476	0.163761	0.218875	0.176043	0.217548	0.17479	0.175922	0.184638	0.197228	0.164243	0.216294	0.196861	0.15691	0.231239	0.169798	0.188105	0.209174	0.165025	0.252534	0.165777	0.175048	0.200956	0.174334	0.169005	0.168002	0.169281	0.230868	0.145925	0.167982	0.205371	0.186489	0.240177	0.15343	0.189696
2950b00a-db21-42fc-9b37-6fb58e3e8f77	5d11db29-925c-4cd5-a231-300507c63116	740	28	28	2025-08-22T23:02:29.000429Z	0.149967	0.130363	0.141669	0.137981	0.190115	0.149881	0.185328	0.181837	0.171544	0.134549	0.129718	0.139466	0.136331	0.112404	0.140482	0.111875	0.111508	0.125658	0.125581	0.102732	0.1449	0.122421	0.100707	0.155487	0.137798	0.149522	0.165223	0.127969	0.19093	0.133661	0.138992	0.158379	0.144312	0.136817	0.135224	0.135185	0.175539	0.11948	0.127198	0.158411	0.146187	0.18471	0.123125	0.146208
f2e5040e-836a-42be-b32a-522ee1327697	5d11db29-925c-4cd5-a231-300507c63116	590	28	28	2025-08-22T23:22:12.000429Z	0.17642	0.184544	0.198072	0.189631	0.271753	0.2105	0.24942	0.243621	0.23167	0.171875	0.157165	0.163968	0.217455	0.18519	0.2253	0.175957	0.180472	0.195733	0.208239	0.167636	0.24	0.207878	0.163217	0.246641	0.174269	0.200334	0.230617	0.169506	0.269353	0.166192	0.186077	0.217242	0.186152	0.167996	0.167462	0.171604	0.241654	0.146077	0.181933	0.195746	0.189298	0.261899	0.214885	0.192843
e07f3832-99a9-4e3d-b338-68298bd8592b	5d11db29-925c-4cd5-a231-300507c63116	740	28	28	2025-08-22T23:22:28.000429Z	0.145535	0.140147	0.146684	0.141796	0.207005	0.156949	0.19236	0.183439	0.181746	0.141271	0.131728	0.140351	0.137335	0.119416	0.144201	0.111892	0.113705	0.13276	0.130303	0.10458	0.156515	0.127494	0.104127	0.163121	0.141997	0.151889	0.178799	0.130864	0.199436	0.133329	0.144567	0.166322	0.151267	0.135837	0.134541	0.137301	0.183219	0.119101	0.133054	0.151567	0.146833	0.197944	0.176758	0.147638
53dfcf61-255f-41aa-9310-8d9b29eb00b9	5d11db29-925c-4cd5-a231-300507c63116	590	28	28	2025-08-22T23:42:14.000429Z	0.177639	0.221631	0.219713	0.194565	0.265786	0.221523	0.264553	0.25586	0.239807	0.205475	0.164805	0.16422	0.205393	0.188606	0.234169	0.177577	0.18324	0.207774	0.231269	0.170611	0.258296	0.219494	0.173409	0.267092	0.179548	0.208123	0.249531	0.173483	0.280636	0.16757	0.200489	0.237844	0.196742	0.168086	0.168434	0.170873	0.257023	0.144392	0.193177	0.188532	0.193212	0.292452	0.222823	0.184807
b3ebc388-ea0d-4326-b706-072b3fd27fcc	5d11db29-925c-4cd5-a231-300507c63116	740	28	28	2025-08-22T23:42:30.000429Z	0.144757	0.164634	0.164677	0.146456	0.205489	0.16193	0.198274	0.19448	0.185127	0.161932	0.136939	0.139682	0.125604	0.121326	0.14949	0.11168	0.116764	0.140127	0.144014	0.104957	0.1651	0.13518	0.109428	0.173686	0.143418	0.155846	0.191152	0.132952	0.205183	0.133481	0.152353	0.177752	0.157785	0.135385	0.134674	0.136949	0.190929	0.117979	0.139109	0.144522	0.147933	0.212458	0.17955	0.140364
9862bc3a-3fef-49f2-8372-7daa6e0500e0	5d11db29-925c-4cd5-a231-300507c63116	590	28	28	2025-08-23T00:02:13.000429Z	0.18586	0.230495	0.230529	0.204246	0.31166	0.22387	0.276501	0.27368	0.253137	0.233507	0.17713	0.165221	0.18975	0.190704	0.240845	0.178286	0.190369	0.221056	0.244532	0.173569	0.271605	0.227585	0.201355	0.281258	0.184416	0.22009	0.265449	0.178044	0.29219	0.171235	0.209971	0.259416	0.209256	0.168532	0.17143	0.173059	0.272908	0.147658	0.203542	0.190407	0.198043	0.314859	0.186821	0.18516
5bb28b01-460a-4b28-94ce-f6e19c55580f	5d11db29-925c-4cd5-a231-300507c63116	740	28	28	2025-08-23T00:02:30.000429Z	0.148287	0.170765	0.176005	0.151119	0.233007	0.162891	0.207962	0.200085	0.191162	0.178366	0.145257	0.138595	0.117213	0.121187	0.152859	0.111366	0.119596	0.146646	0.150515	0.106353	0.171006	0.137631	0.128943	0.180974	0.145371	0.165125	0.199847	0.135459	0.207915	0.134732	0.157546	0.18716	0.164919	0.134632	0.135912	0.137099	0.199921	0.119801	0.144176	0.143861	0.149224	0.222323	0.153743	0.139378
5003c3fb-cd41-4a10-8355-1855585e444a	5d11db29-925c-4cd5-a231-300507c63116	590	28	28	2025-08-23T00:22:14.000429Z	0.194318	0.23602	0.240678	0.217606	0.330686	0.239042	0.294361	0.281195	0.272404	0.261044	0.217892	0.173695	0.185921	0.191303	0.244877	0.18045	0.19605	0.234257	0.253883	0.178499	0.284397	0.211102	0.217902	0.303098	0.189	0.233884	0.292497	0.18372	0.298107	0.194546	0.217343	0.276785	0.221367	0.170188	0.175864	0.177992	0.283401	0.153656	0.224209	0.197277	0.202285	0.334358	0.171426	0.188227
0dcf6ecc-e1ba-4184-93f1-5439f0f53fb1	5d11db29-925c-4cd5-a231-300507c63116	740	28	28	2025-08-23T00:22:30.000429Z	0.152905	0.175451	0.185609	0.162081	0.240849	0.171795	0.216831	0.204002	0.196202	0.193602	0.169174	0.144396	0.113379	0.120802	0.152873	0.111038	0.124809	0.154905	0.1539	0.108519	0.175518	0.125649	0.139093	0.194502	0.147369	0.172679	0.215824	0.137819	0.211742	0.148594	0.16418	0.193216	0.172726	0.134755	0.138278	0.138593	0.208862	0.123172	0.159798	0.147391	0.150763	0.236827	0.140787	0.140419
e2f319b9-f02d-4497-a1c7-75699e29b411	5d11db29-925c-4cd5-a231-300507c63116	590	28	28	2025-08-23T00:42:12.000429Z	0.21118	0.236309	0.244461	0.223627	0.353528	0.241943	0.311668	0.302999	0.280742	0.281669	0.222595	0.200337	0.200338	0.198121	0.253165	0.207729	0.233321	0.247113	0.264165	0.187683	0.290784	0.219709	0.230397	0.329231	0.194731	0.246456	0.348376	0.190335	0.303822	0.203533	0.225664	0.293438	0.236798	0.188487	0.194944	0.188976	0.331607	0.168536	0.248809	0.215539	0.206764	0.371742	0.172184	0.198969
e237c1e5-9216-48f1-9974-12e5e7b4fb0b	5d11db29-925c-4cd5-a231-300507c63116	740	28	28	2025-08-23T00:42:28.000429Z	0.163116	0.176524	0.188103	0.16715	0.255128	0.173922	0.227285	0.213421	0.202464	0.205792	0.170922	0.160828	0.119724	0.123124	0.154458	0.127919	0.152808	0.162175	0.162116	0.113475	0.178572	0.128698	0.144473	0.211271	0.15022	0.176774	0.251893	0.141111	0.214528	0.154724	0.170538	0.197507	0.182084	0.145141	0.149903	0.145987	0.239582	0.133022	0.18081	0.158006	0.152875	0.256359	0.137132	0.146402
bba99f81-022f-4666-bbaa-3a4fe0c9c0c3	5d11db29-925c-4cd5-a231-300507c63116	590	28	28	2025-08-23T01:02:13.000429Z	0.211613	0.237008	0.239885	0.228911	0.353555	0.246264	0.33235	0.318801	0.290539	0.308116	0.217902	0.197237	0.210631	0.204642	0.260077	0.220483	0.23546	0.264176	0.272336	0.201923	0.30216	0.229604	0.241382	0.377208	0.202455	0.255113	0.391594	0.198896	0.309046	0.205688	0.248323	0.304796	0.256232	0.206419	0.203575	0.211007	0.349927	0.174511	0.244522	0.251068	0.212215	0.398456	0.183995	0.232103
fc69a36e-7ebc-44f3-954a-26805a6dfa02	5d11db29-925c-4cd5-a231-300507c63116	740	28	28	2025-08-23T01:02:29.000429Z	0.162973	0.177662	0.181348	0.170892	0.258863	0.177427	0.23947	0.224337	0.210938	0.221509	0.169049	0.160421	0.128094	0.127092	0.159522	0.134809	0.152857	0.17351	0.170816	0.120806	0.185841	0.132023	0.149933	0.246032	0.154394	0.180135	0.277324	0.145397	0.216273	0.15564	0.188559	0.202152	0.194817	0.157046	0.155694	0.15938	0.252025	0.137315	0.178399	0.178586	0.155737	0.27324	0.142512	0.165107
0a853a34-86c8-4141-bed9-5a33f0de34d2	5d11db29-925c-4cd5-a231-300507c63116	590	28	28	2025-08-23T01:22:13.000429Z	0.208844	0.24304	0.234185	0.232894	0.394034	0.266254	0.340945	0.345288	0.306793	0.332169	0.197386	0.199048	0.223957	0.214742	0.274029	0.21917	0.24134	0.280111	0.268132	0.212356	0.318418	0.246322	0.249364	0.406	0.217437	0.265278	0.419865	0.199836	0.313802	0.207101	0.25366	0.312116	0.285762	0.206971	0.205102	0.211486	0.415551	0.174353	0.244948	0.252601	0.217312	0.422808	0.19558	0.240476
90f65748-e3bb-41a4-aabf-997342d264c1	5d11db29-925c-4cd5-a231-300507c63116	740	28	28	2025-08-23T01:22:29.000429Z	0.16107	0.182193	0.174847	0.173588	0.285356	0.193579	0.242724	0.234247	0.220091	0.234981	0.1556	0.159082	0.136839	0.133424	0.164334	0.134101	0.15564	0.184214	0.167504	0.127717	0.195448	0.14117	0.154499	0.2644	0.162439	0.185723	0.291216	0.141945	0.218324	0.156221	0.193246	0.204135	0.219092	0.156755	0.156104	0.159547	0.287435	0.137661	0.178391	0.179087	0.158821	0.285633	0.146218	0.169798
502fc2cb-a8e0-419e-b1ff-36f7b5c75c1a	5d11db29-925c-4cd5-a231-300507c63116	590	28	28	2025-08-23T01:42:14.000429Z	0.201689	0.243577	0.248716	0.240315	0.417491	0.261741	0.388697	0.376774	0.326841	0.353672	0.206028	0.193226	0.234197	0.236017	0.286813	0.22228	0.243702	0.299613	0.279641	0.218478	0.335982	0.259754	0.258736	0.455278	0.238092	0.276105	0.453298	0.207012	0.319822	0.208366	0.242652	0.313063	0.322624	0.207617	0.206789	0.213746	0.47725	0.17227	0.243536	0.253866	0.222737	0.449211	0.202872	0.239523
a9237712-eaf6-4b53-b7af-3fd6fc6718aa	5d11db29-925c-4cd5-a231-300507c63116	740	28	28	2025-08-23T01:42:30.000429Z	0.158543	0.181759	0.180891	0.177714	0.298596	0.187187	0.273969	0.252432	0.231551	0.248502	0.160306	0.155119	0.143089	0.148924	0.171041	0.136553	0.155129	0.195729	0.174427	0.131058	0.204979	0.145783	0.159894	0.292318	0.174843	0.193098	0.309769	0.145335	0.22086	0.156793	0.186442	0.205347	0.248964	0.157146	0.157254	0.159697	0.320676	0.136474	0.17629	0.179844	0.161868	0.301122	0.150285	0.169418
afed2ca0-b49a-42e8-8b4c-7cd783c68fd6	5d11db29-925c-4cd5-a231-300507c63116	590	28	28	2025-08-23T02:02:13.000429Z	0.203209	0.255873	0.26087	0.250684	0.44786	0.289533	0.417582	0.380262	0.346092	0.375829	0.217806	0.191115	0.239204	0.223599	0.305375	0.225948	0.250897	0.320226	0.276769	0.221332	0.361191	0.275782	0.269759	0.511763	0.261373	0.287647	0.490699	0.218465	0.326522	0.209954	0.23393	0.325857	0.38963	0.20711	0.207462	0.202866	0.555888	0.169394	0.247698	0.257027	0.22957	0.50502	0.20671	0.240314
0018f696-3e38-4d88-8ec5-7eb656f962c1	5d11db29-925c-4cd5-a231-300507c63116	740	28	28	2025-08-23T02:02:29.000429Z	0.160117	0.188604	0.186986	0.182682	0.315919	0.204132	0.291844	0.253205	0.243432	0.262839	0.166478	0.153068	0.148077	0.143443	0.181779	0.137679	0.156988	0.208295	0.171044	0.131947	0.222652	0.153619	0.166208	0.323379	0.187998	0.200481	0.33063	0.153136	0.224018	0.157512	0.177415	0.210116	0.304802	0.156525	0.157216	0.153789	0.353078	0.134529	0.177225	0.180755	0.166019	0.333327	0.153384	0.169661
bec51cf2-31ea-4360-8a37-ad0d493a6df2	5d11db29-925c-4cd5-a231-300507c63116	590	28	28	2025-08-23T02:22:13.000429Z	0.203285	0.269909	0.27562	0.263624	0.488851	0.294623	0.466941	0.412464	0.363025	0.403366	0.227968	0.187393	0.248761	0.213722	0.321564	0.226079	0.255581	0.354323	0.282583	0.201644	0.384231	0.292677	0.286334	0.567365	0.245646	0.301603	0.517794	0.247248	0.332621	0.211618	0.238627	0.348053	0.483141	0.20688	0.206325	0.199184	0.663761	0.166223	0.255209	0.257642	0.239229	0.540242	0.210374	0.241275
5387c292-b541-4d91-8b3a-9ff26b2f317a	5d11db29-925c-4cd5-a231-300507c63116	740	28	28	2025-08-23T02:22:29.000429Z	0.158973	0.195486	0.194476	0.189956	0.336612	0.20665	0.327867	0.269607	0.254498	0.280597	0.170966	0.151865	0.152242	0.131265	0.192047	0.137736	0.158446	0.233789	0.171997	0.122969	0.243531	0.162083	0.175429	0.351501	0.179466	0.208223	0.349032	0.168188	0.227363	0.158108	0.177084	0.220244	0.371566	0.156272	0.156728	0.152303	0.421533	0.132775	0.180283	0.180668	0.171553	0.355099	0.15517	0.169878
84ad462f-a057-4632-9733-2a97d0137b51	5d11db29-925c-4cd5-a231-300507c63116	590	28	28	2025-08-23T02:42:14.000429Z	0.203546	0.283545	0.290779	0.276833	0.534173	0.313237	0.507635	0.441252	0.382884	0.431299	0.239019	0.185443	0.255117	0.224294	0.345875	0.226893	0.265528	0.433648	0.29883	0.21382	0.4053	0.30163	0.301616	0.623383	0.246225	0.320843	0.542369	0.262619	0.338241	0.211858	0.247132	0.372165	0.519613	0.206891	0.205389	0.19867	0.727821	0.164385	0.266348	0.256117	0.248534	0.589711	0.210391	0.242212
9d4f9f74-66ac-4363-8a37-3f3e8da111e8	5d11db29-925c-4cd5-a231-300507c63116	740	28	28	2025-08-23T02:42:30.000429Z	0.158589	0.202284	0.202146	0.198481	0.35814	0.21668	0.340714	0.2858	0.266491	0.297722	0.176183	0.150056	0.157047	0.135256	0.206215	0.138571	0.163024	0.291282	0.183017	0.127944	0.253579	0.167981	0.184588	0.381699	0.180238	0.218165	0.35876	0.174441	0.230603	0.158979	0.178008	0.231177	0.392917	0.156276	0.156267	0.151984	0.458526	0.132008	0.18546	0.179471	0.177282	0.386946	0.154785	0.170122
24a1e321-48d7-4544-9a8c-6b9f4212c3ce	5d11db29-925c-4cd5-a231-300507c63116	590	28	28	2025-08-23T03:02:13.000429Z	0.202312	0.298985	0.305266	0.291432	0.571649	0.327111	0.556215	0.455582	0.406227	0.45555	0.254056	0.185222	0.260253	0.242309	0.366905	0.225964	0.274761	0.484028	0.311604	0.223018	0.437236	0.310884	0.321581	0.685235	0.245754	0.337947	0.581414	0.27491	0.344407	0.210796	0.267971	0.394918	0.556041	0.206697	0.205159	0.197151	0.786097	0.163048	0.278549	0.254312	0.260476	0.641484	0.213838	0.242503
097a1f98-2a46-436e-b3bf-53bb71514a1a	5d11db29-925c-4cd5-a231-300507c63116	740	28	28	2025-08-23T03:02:30.000429Z	0.157957	0.209638	0.209611	0.207876	0.374487	0.223511	0.381264	0.29492	0.2794	0.312704	0.183075	0.149582	0.160236	0.143396	0.217951	0.13846	0.168043	0.320115	0.189885	0.131144	0.270044	0.172259	0.195559	0.412798	0.180573	0.228688	0.377858	0.180968	0.234187	0.158523	0.185876	0.241558	0.408944	0.156652	0.15609	0.151757	0.490712	0.131096	0.191131	0.178137	0.184343	0.416985	0.154057	0.169961
ae33bd7c-3869-4f26-ad39-91647583e6cc	5d11db29-925c-4cd5-a231-300507c63116	590	28	28	2025-08-23T03:22:12.000429Z	0.201674	0.314227	0.319408	0.308717	0.623305	0.341415	0.59139	0.474277	0.429408	0.478669	0.267538	0.182773	0.267331	0.250768	0.384493	0.224782	0.286052	0.535723	0.330439	0.227189	0.471473	0.317361	0.345821	0.745269	0.244172	0.35854	0.613494	0.286179	0.350907	0.209222	0.295678	0.415861	0.590564	0.206437	0.205471	0.198054	0.846794	0.162098	0.293991	0.252115	0.239013	0.689498	0.210464	0.241665
41ee6a2e-9ec0-4fa2-88ef-086c2954cf67	5d11db29-925c-4cd5-a231-300507c63116	740	28	28	2025-08-23T03:22:28.000429Z	0.157051	0.217456	0.216026	0.218319	0.400301	0.231252	0.399523	0.304758	0.293641	0.329533	0.188233	0.149625	0.16517	0.146479	0.227834	0.137955	0.174898	0.350831	0.200855	0.134058	0.28842	0.176064	0.208596	0.444232	0.180064	0.240909	0.396778	0.186996	0.23789	0.157474	0.196312	0.25205	0.422462	0.157007	0.156227	0.151503	0.523065	0.130332	0.198547	0.176943	0.172234	0.443793	0.153263	0.16945
8db62233-97bd-4361-9fcd-15f9b6c6a854	5d11db29-925c-4cd5-a231-300507c63116	590	28	28	2025-08-23T03:42:15.000429Z	0.2003	0.329825	0.328028	0.325479	0.639298	0.360175	0.635349	0.500502	0.452312	0.504608	0.278317	0.181307	0.264005	0.265953	0.401101	0.218074	0.298254	0.572804	0.35042	0.232165	0.50009	0.32269	0.365987	0.799807	0.242557	0.377813	0.651154	0.298651	0.357135	0.207375	0.3115	0.434736	0.624898	0.205916	0.205708	0.196887	0.893838	0.160907	0.306553	0.248614	0.238691	0.736712	0.214942	0.240067
313a026d-16c0-47b0-9da9-c51b654fd0ed	5d11db29-925c-4cd5-a231-300507c63116	740	28	28	2025-08-23T03:42:31.000429Z	0.156785	0.225191	0.220145	0.228025	0.414706	0.241235	0.424233	0.319431	0.307184	0.345034	0.19379	0.148389	0.166355	0.153137	0.237296	0.135458	0.182776	0.371652	0.21085	0.136583	0.304039	0.179263	0.221654	0.475669	0.17846	0.251654	0.414559	0.193033	0.241646	0.156627	0.202803	0.262143	0.435317	0.15656	0.15636	0.15206	0.554895	0.129762	0.204283	0.175474	0.171578	0.469762	0.155091	0.168692
74390c84-6cc5-44b6-9ec0-c3d22d3f4322	5d11db29-925c-4cd5-a231-300507c63116	590	28	28	2025-08-23T04:02:13.000429Z	0.198835	0.347798	0.34164	0.347151	0.682617	0.379389	0.681864	0.514623	0.477161	0.537493	0.291067	0.180031	0.259804	0.278206	0.417505	0.213397	0.31774	0.60629	0.376279	0.243241	0.533928	0.331554	0.392997	0.852363	0.241258	0.397843	0.689708	0.311988	0.363875	0.206017	0.330969	0.448723	0.656767	0.205475	0.205887	0.197813	0.93766	0.161225	0.318103	0.245762	0.239455	0.781708	0.209094	0.238681
df411212-64e0-43e1-9a72-fd92e152b840	5d11db29-925c-4cd5-a231-300507c63116	740	28	28	2025-08-23T04:02:29.000429Z	0.155577	0.234472	0.22515	0.24231	0.434343	0.251844	0.450387	0.329448	0.326764	0.364781	0.199137	0.147699	0.163319	0.157537	0.245727	0.131952	0.195572	0.389741	0.22438	0.141471	0.319271	0.183508	0.238714	0.504937	0.177437	0.265227	0.434912	0.199297	0.245403	0.155559	0.215043	0.269995	0.446368	0.15638	0.156716	0.152155	0.580981	0.129774	0.2105	0.173764	0.17177	0.497519	0.151827	0.167614
20c78b43-9613-4745-a861-97230dbd66b6	5d11db29-925c-4cd5-a231-300507c63116	590	28	28	2025-08-23T04:22:12.000429Z	0.196933	0.36737	0.359955	0.373461	0.705665	0.396864	0.725701	0.511995	0.51284	0.575804	0.301816	0.178503	0.250439	0.286613	0.434334	0.209844	0.343814	0.630464	0.397757	0.244958	0.571458	0.345776	0.421562	0.896884	0.240263	0.420428	0.724229	0.326737	0.370594	0.204629	0.348867	0.472699	0.679199	0.203694	0.205721	0.198865	0.968727	0.161444	0.330139	0.243438	0.240425	0.831029	0.211695	0.23627
3dc903c6-ea4b-47cf-8f88-2247f25e8cf1	5d11db29-925c-4cd5-a231-300507c63116	740	28	28	2025-08-23T04:22:28.000429Z	0.154152	0.244367	0.233894	0.258783	0.449894	0.261861	0.474647	0.325907	0.349494	0.386193	0.204207	0.146615	0.159261	0.1616	0.255979	0.129913	0.211955	0.401605	0.234231	0.142119	0.335843	0.191981	0.257254	0.533834	0.177247	0.279388	0.453694	0.205308	0.249178	0.154911	0.223349	0.280094	0.449194	0.155082	0.15644	0.151774	0.602802	0.129786	0.217433	0.172478	0.172092	0.52618	0.152186	0.166311
1d635bbf-af29-4ce8-88eb-af5a4820603e	5d11db29-925c-4cd5-a231-300507c63116	590	28	28	2025-08-23T04:42:13.000429Z	0.193464	0.385576	0.377161	0.403402	0.740289	0.412699	0.766687	0.525518	0.544466	0.615742	0.313271	0.177156	0.258182	0.297142	0.449558	0.206866	0.37424	0.65403	0.415178	0.255691	0.611953	0.35164	0.451029	0.943967	0.238023	0.4438	0.76149	0.338957	0.377315	0.202917	0.363659	0.497741	0.702204	0.2009	0.203721	0.196854	1.00193	0.161077	0.339962	0.241885	0.241142	0.884095	0.209832	0.234299
d5622295-cf21-4a36-83f4-dae8c80caeef	5d11db29-925c-4cd5-a231-300507c63116	740	28	28	2025-08-23T04:42:29.000429Z	0.152641	0.254111	0.243437	0.277495	0.476547	0.271904	0.496866	0.331763	0.37112	0.408333	0.209929	0.146213	0.162251	0.166957	0.264924	0.128383	0.231975	0.409091	0.242632	0.146676	0.355375	0.195757	0.27685	0.555012	0.175863	0.29445	0.47296	0.211025	0.253485	0.154195	0.229913	0.29268	0.457158	0.154364	0.15561	0.151818	0.621346	0.129771	0.224628	0.17203	0.172298	0.556177	0.151566	0.165473
2ea0617e-2a8b-4803-8714-cd7dfbf53f77	5d11db29-925c-4cd5-a231-300507c63116	590	28	28	2025-08-23T05:02:13.000429Z	0.19181	0.405866	0.395431	0.443853	0.757582	0.432899	0.80664	0.530715	0.584131	0.659262	0.326164	0.175871	0.25509	0.307022	0.459502	0.204851	0.420714	0.673744	0.430013	0.263268	0.652843	0.35019	0.487951	0.989526	0.238424	0.468692	0.792788	0.356235	0.384385	0.20156	0.371225	0.524755	0.728161	0.200007	0.20206	0.198471	1.03228	0.161092	0.346812	0.240845	0.242118	0.93443	0.208473	0.233185
b8aee5b3-139d-4c72-ad2c-1f379e084cc9	5d11db29-925c-4cd5-a231-300507c63116	740	28	28	2025-08-23T05:02:29.000429Z	0.151341	0.264471	0.253917	0.301121	0.490829	0.283674	0.518398	0.333719	0.395448	0.431078	0.215727	0.145668	0.160274	0.17104	0.272117	0.127257	0.261521	0.419272	0.248987	0.149857	0.378178	0.195562	0.298221	0.579792	0.175852	0.310312	0.489277	0.219074	0.257431	0.15349	0.235328	0.30519	0.46617	0.153539	0.154696	0.151107	0.639629	0.129594	0.229215	0.171619	0.172505	0.580883	0.151141	0.164685
bfa06e40-fba0-455d-82dd-ddb0be6e2123	5d11db29-925c-4cd5-a231-300507c63116	590	28	28	2025-08-23T05:22:13.000429Z	0.189538	0.425444	0.415622	0.498305	0.791515	0.456823	0.858836	0.541221	0.626733	0.702605	0.340187	0.175293	0.25419	0.319809	0.475803	0.204984	0.502238	0.697155	0.445495	0.271592	0.693176	0.355529	0.52396	1.03245	0.23872	0.502105	0.826995	0.372547	0.391902	0.198873	0.388042	0.554954	0.747549	0.197436	0.199879	0.196042	1.07199	0.161129	0.353744	0.24051	0.242469	0.978356	0.207865	0.231995
a112aef8-d7ff-49d8-84b4-9b9f5a3a5cb4	5d11db29-925c-4cd5-a231-300507c63116	740	28	28	2025-08-23T05:22:29.000429Z	0.15002	0.275287	0.266777	0.332861	0.51139	0.296683	0.545815	0.339878	0.422471	0.453973	0.222714	0.145031	0.160299	0.176875	0.28032	0.127162	0.316447	0.426325	0.253884	0.153998	0.399034	0.197812	0.320261	0.604858	0.175974	0.327878	0.510198	0.226465	0.262156	0.152219	0.243777	0.319197	0.472398	0.152659	0.153358	0.150757	0.659147	0.129801	0.234524	0.171485	0.172665	0.612789	0.150801	0.164204
c82b3fb1-c8b3-4744-aecc-6c5a06a9df83	5d11db29-925c-4cd5-a231-300507c63116	590	28	28	2025-08-23T05:42:14.000429Z	0.188553	0.446175	0.434025	0.547896	0.808138	0.486764	0.893665	0.550681	0.676449	0.744071	0.355377	0.174278	0.252286	0.328815	0.498006	0.204243	0.556515	0.722755	0.459744	0.276001	0.726619	0.364623	0.557712	1.07372	0.237093	0.533548	0.860264	0.389664	0.398792	0.195616	0.401834	0.584324	0.773485	0.197224	0.197182	0.19478	1.10834	0.160984	0.362794	0.239622	0.241837	1.00579	0.208435	0.230792
cb724405-647c-433e-a092-b257db50a0a4	5d11db29-925c-4cd5-a231-300507c63116	740	28	28	2025-08-23T05:42:30.000429Z	0.148813	0.287081	0.275706	0.363197	0.524846	0.313568	0.563651	0.346615	0.452045	0.476315	0.230182	0.144712	0.158693	0.180389	0.292323	0.126319	0.34867	0.438737	0.259427	0.154429	0.417815	0.201947	0.341076	0.629097	0.175299	0.345552	0.536219	0.234237	0.266318	0.150698	0.251212	0.333109	0.483538	0.152957	0.152055	0.149604	0.676485	0.129771	0.240686	0.171001	0.172472	0.632965	0.150449	0.163575
46a3f80c-3be7-4a23-8a00-d6d258d5fe7c	5d11db29-925c-4cd5-a231-300507c63116	590	28	28	2025-08-23T06:02:13.000429Z	0.186676	0.465914	0.458467	0.581995	0.823141	0.5211	0.927973	0.569095	0.729152	0.781727	0.371954	0.173655	0.255911	0.339056	0.530478	0.203628	0.589868	0.753574	0.47469	0.281254	0.760243	0.365448	0.588971	1.11837	0.236912	0.565154	0.891214	0.404165	0.405769	0.19374	0.418804	0.622092	0.796564	0.197369	0.195069	0.193074	1.15104	0.161402	0.372948	0.238703	0.242312	1.01914	0.211449	0.230035
c03b120d-67bd-419e-b5a3-530fffd2826a	5d11db29-925c-4cd5-a231-300507c63116	740	28	28	2025-08-23T06:02:29.000429Z	0.148049	0.29731	0.287826	0.381096	0.527808	0.332013	0.582791	0.354946	0.482905	0.49748	0.238563	0.143867	0.160101	0.184573	0.30763	0.126355	0.364831	0.451536	0.265704	0.155627	0.435449	0.203101	0.35986	0.64684	0.174929	0.36249	0.554655	0.240567	0.270558	0.149521	0.25836	0.350506	0.49207	0.1529	0.150694	0.149055	0.695008	0.129831	0.249183	0.170586	0.172309	0.641192	0.150384	0.16291
08658029-6cac-4728-9d05-cc8a6bf696aa	5d11db29-925c-4cd5-a231-300507c63116	590	28	28	2025-08-23T06:22:13.000429Z	0.185532	0.482784	0.472677	0.607983	0.858789	0.56478	0.953642	0.592222	0.780355	0.807463	0.386909	0.172429	0.257051	0.354023	0.566699	0.204278	0.633182	0.792415	0.50132	0.290272	0.792976	0.372195	0.629579	1.15223	0.236732	0.60355	0.911791	0.418594	0.411981	0.192769	0.437639	0.65118	0.81687	0.197767	0.193516	0.192103	1.17993	0.161494	0.394991	0.238202	0.241763	1.03016	0.215591	0.229551
ddebafd1-65e0-491b-8296-ce73f3fe28b6	5d11db29-925c-4cd5-a231-300507c63116	740	28	28	2025-08-23T06:22:29.000429Z	0.147202	0.307006	0.294875	0.396584	0.54817	0.356178	0.597918	0.368724	0.512832	0.510074	0.246065	0.143318	0.160508	0.190842	0.327227	0.126109	0.385486	0.470173	0.281329	0.159257	0.454119	0.207853	0.38355	0.668771	0.174759	0.384711	0.564481	0.247661	0.273958	0.148874	0.268449	0.36351	0.500089	0.153048	0.150022	0.147725	0.712508	0.129884	0.26241	0.170143	0.172011	0.648224	0.151674	0.162522
4f6b563e-43f7-41f1-a0cf-6505442aaa2c	5d11db29-925c-4cd5-a231-300507c63116	590	28	28	2025-08-23T06:42:14.000429Z	0.184749	0.501967	0.49246	0.630254	0.875644	0.607581	1.00018	0.614219	0.842645	0.832373	0.401781	0.171529	0.254794	0.366552	0.59217	0.203493	0.665228	0.82561	0.521191	0.299995	0.822067	0.377444	0.672737	1.17728	0.236146	0.636923	0.938082	0.431621	0.417623	0.192541	0.458394	0.682205	0.83681	0.197197	0.19245	0.192018	1.19338	0.161753	0.418137	0.23773	0.241575	1.0502	0.215723	0.228803
da303b10-03a5-4090-875d-1262051ff0b4	5d11db29-925c-4cd5-a231-300507c63116	740	28	28	2025-08-23T06:42:30.000429Z	0.146625	0.316678	0.30251	0.4086	0.557789	0.381362	0.625237	0.38097	0.545495	0.522008	0.254171	0.142727	0.15862	0.197701	0.336983	0.126481	0.401869	0.48453	0.28817	0.163065	0.469309	0.210747	0.412958	0.684359	0.174299	0.405364	0.578892	0.254731	0.277579	0.148766	0.278073	0.378011	0.507185	0.152901	0.149591	0.147042	0.715887	0.130082	0.277338	0.169872	0.1716	0.658592	0.151667	0.162127
86b890b4-c645-4ed4-937a-2a49a94c5bc8	5d11db29-925c-4cd5-a231-300507c63116	590	28	28	2025-08-23T07:02:13.000429Z	0.184004	0.521606	0.50964	0.660191	0.886082	0.649551	1.03853	0.625085	0.903142	0.869325	0.416509	0.171255	0.25348	0.378234	0.630902	0.20435	0.700555	0.865026	0.552017	0.311917	0.852104	0.390006	0.700265	1.19489	0.235973	0.673685	0.961378	0.447817	0.423301	0.19244	0.466045	0.709442	0.853833	0.197374	0.19239	0.188488	1.20017	0.162347	0.44525	0.237488	0.240846	1.06393	0.217175	0.228446
99e672fe-fbb8-485b-b354-5ad2b520d480	5d11db29-925c-4cd5-a231-300507c63116	740	28	28	2025-08-23T07:02:30.000429Z	0.145876	0.327024	0.312309	0.424211	0.563869	0.403416	0.647143	0.387224	0.57829	0.540616	0.261764	0.142357	0.158413	0.20421	0.350716	0.12626	0.420099	0.501073	0.303748	0.168732	0.489253	0.217574	0.424197	0.692755	0.173957	0.424392	0.589799	0.261989	0.28072	0.148578	0.282791	0.391721	0.514233	0.152792	0.149592	0.145468	0.708506	0.13028	0.293276	0.16941	0.171239	0.664767	0.151733	0.161536
f9d63f08-a7e9-4a37-a109-987d855d9476	5d11db29-925c-4cd5-a231-300507c63116	590	28	28	2025-08-23T07:22:12.000429Z	0.18315	0.542352	0.522998	0.689824	0.896555	0.69061	1.07695	0.641095	0.959675	0.908461	0.431312	0.170814	0.251646	0.391151	0.662235	0.204526	0.724088	0.899231	0.556884	0.321445	0.883374	0.394299	0.727713	1.22538	0.235471	0.708455	0.968721	0.463007	0.428769	0.192374	0.478849	0.73952	0.869743	0.197346	0.191945	0.188914	1.23001	0.162767	0.473168	0.23703	0.240142	1.0829	0.21912	0.228633
bd4e87e6-9fc1-46ff-9c06-c93ca8df5104	5d11db29-925c-4cd5-a231-300507c63116	740	28	28	2025-08-23T07:22:28.000429Z	0.145326	0.338104	0.317316	0.439577	0.569045	0.425613	0.665787	0.395295	0.605971	0.562164	0.269332	0.142117	0.155538	0.211164	0.368307	0.127059	0.430096	0.516574	0.306258	0.172443	0.50596	0.220617	0.436116	0.708387	0.173537	0.441032	0.594409	0.269868	0.284269	0.148437	0.290736	0.40644	0.520114	0.153046	0.149385	0.144562	0.723205	0.130523	0.310602	0.169174	0.170436	0.673215	0.153977	0.161589
0b6bc55a-967a-4071-aefe-61de61d67243	5d11db29-925c-4cd5-a231-300507c63116	590	28	28	2025-08-23T07:42:14.000429Z	0.181475	0.56365	0.509792	0.728023	0.899244	0.730414	1.10821	0.657024	1.00757	0.948897	0.444704	0.16949	0.254748	0.408806	0.695436	0.205015	0.748311	0.934884	0.561732	0.329644	0.901755	0.396229	0.761988	1.2489	0.233918	0.743849	0.984034	0.477551	0.433684	0.191575	0.500473	0.767386	0.881002	0.198033	0.191273	0.185076	1.24897	0.162725	0.506639	0.235851	0.238857	1.09951	0.214533	0.227999
5a58571c-d6e0-405d-8a6a-d4c4c86747e4	5d11db29-925c-4cd5-a231-300507c63116	740	28	28	2025-08-23T07:42:30.000429Z	0.144494	0.350446	0.315127	0.456171	0.57195	0.446641	0.681868	0.40446	0.619568	0.587959	0.27739	0.141284	0.158984	0.220361	0.383609	0.126962	0.442574	0.534957	0.306374	0.176754	0.513988	0.223351	0.449324	0.719598	0.173064	0.458368	0.597669	0.27694	0.287635	0.148195	0.300516	0.420929	0.525306	0.15356	0.149356	0.144155	0.726074	0.130817	0.329497	0.168722	0.169941	0.680476	0.151835	0.161388
fb40ad24-302f-4692-a583-2f7712137e4d	5d11db29-925c-4cd5-a231-300507c63116	590	28	28	2025-08-23T08:02:13.000429Z	0.18119	0.589174	0.521324	0.764373	0.916034	0.760151	1.12896	0.677018	1.04439	0.972505	0.458282	0.169142	0.256194	0.421144	0.722064	0.204925	0.77712	0.967033	0.587344	0.342543	0.92458	0.399467	0.79502	1.27375	0.232344	0.77396	1.00307	0.497957	0.438798	0.191777	0.521669	0.787747	0.892534	0.198521	0.191605	0.183818	1.26849	0.163515	0.542253	0.235308	0.238428	1.1153	0.210696	0.228019
e6f79230-8595-4749-9906-d88ccd4cbba2	5d11db29-925c-4cd5-a231-300507c63116	740	28	28	2025-08-23T08:02:29.000429Z	0.144361	0.364485	0.319656	0.473984	0.581542	0.46461	0.694976	0.415385	0.641344	0.600802	0.284701	0.140948	0.15867	0.226099	0.395971	0.126672	0.456102	0.552284	0.321513	0.182392	0.52911	0.224895	0.463128	0.725831	0.172085	0.474331	0.606042	0.286286	0.290678	0.148056	0.310444	0.429456	0.529175	0.153511	0.149466	0.143102	0.735554	0.131195	0.349971	0.16837	0.169496	0.686804	0.149888	0.16102
1adcad7e-4e2d-43fa-81bc-fb738d2cacbe	5d11db29-925c-4cd5-a231-300507c63116	590	28	28	2025-08-23T08:22:12.000429Z	0.180565	0.613054	0.539562	0.799894	0.930527	0.796112	1.14393	0.690139	1.11211	0.98923	0.472269	0.168853	0.252818	0.43462	0.739826	0.205588	0.81278	0.99203	0.612165	0.351783	0.946312	0.401633	0.831196	1.2996	0.230623	0.807703	1.01689	0.511689	0.443224	0.191665	0.516188	0.797399	0.902153	0.198841	0.191382	0.182374	1.28408	0.164111	0.574863	0.235378	0.237906	1.13178	0.209146	0.227604
4c77ae31-183e-4a86-a902-5217c3701479	5d11db29-925c-4cd5-a231-300507c63116	740	28	28	2025-08-23T08:22:28.000429Z	0.143459	0.377877	0.328907	0.490331	0.591513	0.484447	0.699133	0.421567	0.67384	0.605056	0.292266	0.140799	0.157054	0.232939	0.409002	0.127452	0.470763	0.56361	0.332527	0.186578	0.537978	0.226479	0.478865	0.736976	0.171083	0.487458	0.612325	0.293478	0.293352	0.148026	0.310789	0.433664	0.532031	0.153585	0.149434	0.142243	0.73988	0.131582	0.367839	0.168325	0.169075	0.693903	0.149273	0.160786
081f048f-c92b-4e57-82a4-961c18407d1d	5d11db29-925c-4cd5-a231-300507c63116	590	28	28	2025-08-23T08:42:14.000429Z	0.179958	0.640192	0.553642	0.833531	0.944437	0.828555	1.16126	0.707596	1.18439	1.00873	0.484819	0.167695	0.251437	0.446061	0.752679	0.205277	0.856827	1.01751	0.589236	0.359847	0.979317	0.407833	0.865748	1.32031	0.22952	0.838775	1.02934	0.525172	0.447145	0.1914	0.513971	0.77736	0.912168	0.198064	0.190725	0.180899	1.30274	0.164345	0.608304	0.235359	0.236918	1.1444	0.214096	0.227205
a67b09d1-953c-45ad-9f7c-8b687cda045e	5d11db29-925c-4cd5-a231-300507c63116	740	28	28	2025-08-23T08:42:30.000429Z	0.143558	0.392151	0.335855	0.505536	0.600928	0.502696	0.704725	0.430991	0.703909	0.612947	0.299387	0.14011	0.155837	0.238749	0.414988	0.126626	0.492335	0.575188	0.317743	0.190466	0.553706	0.229029	0.494204	0.74138	0.170424	0.501615	0.616397	0.299659	0.295851	0.148064	0.310292	0.424104	0.534667	0.153461	0.14921	0.141718	0.743906	0.131722	0.386776	0.168274	0.168599	0.697252	0.150894	0.160539
6d0cf18a-07a7-4b16-be5c-0fa9a1071f63	5d11db29-925c-4cd5-a231-300507c63116	590	28	28	2025-08-23T09:02:13.000429Z	0.179673	0.669013	0.564712	0.870385	0.974389	0.854079	1.17795	0.731688	1.24387	1.03587	0.498787	0.167126	0.250367	0.461411	0.778338	0.206228	0.905589	1.0427	0.56579	0.356813	0.99433	0.409686	0.897698	1.33484	0.228058	0.866256	1.03707	0.544072	0.451156	0.191481	0.526517	0.765132	0.920268	0.199205	0.190179	0.181829	1.31092	0.164972	0.640206	0.235492	0.236089	1.16	0.21586	0.227174
4db78192-2514-4f0a-aa8a-2b61501b9e29	5d11db29-925c-4cd5-a231-300507c63116	740	28	28	2025-08-23T09:02:29.000429Z	0.142821	0.406853	0.342147	0.523526	0.619307	0.517407	0.710529	0.441715	0.731769	0.621693	0.306974	0.139255	0.154944	0.247001	0.428833	0.127172	0.514209	0.585528	0.305478	0.188483	0.561162	0.230071	0.510078	0.745115	0.169699	0.516625	0.619453	0.309318	0.298413	0.147894	0.315653	0.420498	0.536408	0.153876	0.148754	0.14099	0.745685	0.132015	0.404154	0.168173	0.16796	0.703355	0.151254	0.16039
3ae8b469-9617-4bda-9444-21f63abc39c3	5d11db29-925c-4cd5-a231-300507c63116	590	28	28	2025-08-23T09:22:13.000429Z	0.178208	0.693913	0.577515	0.912077	0.965291	0.877815	1.18956	0.739795	1.289	1.08589	0.511659	0.166386	0.250458	0.477413	0.794024	0.206693	0.953305	1.07552	0.557936	0.35769	1.01448	0.41383	0.927306	1.3482	0.226821	0.905425	1.04523	0.55839	0.455031	0.191237	0.539021	0.770983	0.926966	0.199792	0.189281	0.179902	1.3392	0.165343	0.673217	0.235652	0.235383	1.18233	0.21805	0.227076
471d8b75-5eac-4936-b802-09c2bb7ca56a	5d11db29-925c-4cd5-a231-300507c63116	740	28	28	2025-08-23T09:22:29.000429Z	0.14226	0.421404	0.350244	0.545332	0.615775	0.529724	0.713299	0.44531	0.747612	0.640277	0.313832	0.13899	0.155138	0.254332	0.437501	0.127003	0.532712	0.597358	0.308841	0.188038	0.573264	0.232109	0.523811	0.746253	0.168813	0.531964	0.621094	0.316976	0.301146	0.147657	0.322154	0.421493	0.537891	0.153935	0.148196	0.14077	0.754336	0.132188	0.4227	0.168226	0.167457	0.713126	0.150985	0.160167
9882a16c-18ac-4c72-a223-6aff4fb397fe	5d11db29-925c-4cd5-a231-300507c63116	590	28	28	2025-08-23T09:42:14.000429Z	0.178035	0.720653	0.596368	0.93188	0.95778	0.892789	1.20475	0.75196	1.32997	1.11568	0.523921	0.165536	0.24853	0.497514	0.802079	0.205044	0.998212	1.10371	0.589645	0.356659	1.02791	0.422178	0.955789	1.35699	0.225926	0.93332	1.05082	0.570901	0.459128	0.191546	0.555859	0.805542	0.933631	0.1999	0.188188	0.18025	1.35177	0.165327	0.701842	0.236154	0.235102	1.20415	0.21624	0.226871
2c24f5f9-3d3b-4538-b86d-96ebca958fcd	5d11db29-925c-4cd5-a231-300507c63116	740	28	28	2025-08-23T09:42:30.000429Z	0.14167	0.437611	0.357707	0.560198	0.610619	0.54062	0.716553	0.452019	0.762041	0.654347	0.320659	0.138467	0.153908	0.264221	0.437993	0.126758	0.552755	0.609327	0.332611	0.188276	0.578395	0.237729	0.536516	0.745869	0.167919	0.546039	0.621753	0.323589	0.303847	0.147831	0.330121	0.432338	0.538709	0.154231	0.147742	0.140125	0.755852	0.132374	0.43867	0.168359	0.167083	0.721591	0.150326	0.15993
7242b449-48cf-4249-926f-5f47c3cef71e	5d11db29-925c-4cd5-a231-300507c63116	590	28	28	2025-08-23T10:02:13.000429Z	0.177786	0.749757	0.612121	0.952952	0.958664	0.911375	1.22561	0.769855	1.38576	1.13009	0.536052	0.165196	0.24685	0.517887	0.82881	0.205468	1.0403	1.13994	0.590361	0.3653	1.03909	0.424159	0.984494	1.36411	0.224498	0.96241	1.05461	0.582299	0.463018	0.191828	0.571683	0.840548	0.939366	0.200416	0.18729	0.179187	1.35513	0.165939	0.732635	0.236595	0.234515	1.21951	0.220993	0.227273
ea5d5cda-ea0e-465b-a657-3175dd08f955	5d11db29-925c-4cd5-a231-300507c63116	740	28	28	2025-08-23T10:02:29.000429Z	0.141484	0.454483	0.367764	0.571505	0.610102	0.552278	0.721827	0.460731	0.78311	0.662101	0.327165	0.138106	0.153161	0.274678	0.448842	0.126246	0.573677	0.624314	0.330037	0.192275	0.582689	0.239464	0.549944	0.74449	0.167551	0.559735	0.621927	0.32952	0.306364	0.147868	0.33896	0.451222	0.539628	0.154246	0.147059	0.139426	0.755396	0.132477	0.455797	0.168364	0.166761	0.725421	0.153038	0.159968
d6e5c696-87d7-4b30-b42a-714cd36ad000	5d11db29-925c-4cd5-a231-300507c63116	590	28	28	2025-08-23T10:22:12.000429Z	0.176106	0.778446	0.629454	0.976446	0.96222	0.933395	1.23649	0.769681	1.40446	1.15302	0.547648	0.164319	0.247667	0.536616	0.848016	0.206846	1.07582	1.17038	0.605522	0.369805	1.05458	0.429628	1.01063	1.38373	0.223738	0.991859	1.05824	0.600561	0.466956	0.191934	0.591271	0.875677	0.94561	0.200664	0.186126	0.17724	1.36379	0.166447	0.764373	0.23647	0.234143	1.2352	0.215953	0.227071
6eb28315-feab-48ef-aa0c-bec5b516bb41	5d11db29-925c-4cd5-a231-300507c63116	740	28	28	2025-08-23T10:22:28.000429Z	0.140744	0.470208	0.375755	0.582558	0.610652	0.563777	0.723901	0.46257	0.788406	0.672664	0.333737	0.137501	0.153015	0.284179	0.45664	0.127489	0.590009	0.637173	0.335876	0.193961	0.591597	0.241679	0.561326	0.746821	0.167017	0.573395	0.621484	0.339143	0.309104	0.147857	0.346579	0.470258	0.541587	0.154257	0.14607	0.13927	0.754518	0.132796	0.472955	0.168211	0.166348	0.730707	0.15035	0.159782
a20d9ac1-5725-49f3-a1cd-6e862e0ba5d5	5d11db29-925c-4cd5-a231-300507c63116	590	28	28	2025-08-23T10:42:12.000429Z	0.176081	0.813641	0.647519	1.01091	0.976285	0.95182	1.23529	0.784391	1.42757	1.16102	0.559368	0.163301	0.248455	0.555415	0.864908	0.2083	1.10899	1.18169	0.618495	0.374173	1.07018	0.437208	1.03189	1.38532	0.223561	1.02106	1.06298	0.614552	0.470727	0.191178	0.604088	0.899325	0.950306	0.200124	0.184527	0.177667	1.37736	0.166584	0.799995	0.23647	0.233466	1.24507	0.218186	0.226941
6ff01812-170f-4245-b0c1-d395e196078e	5d11db29-925c-4cd5-a231-300507c63116	740	28	28	2025-08-23T10:42:28.000429Z	0.140525	0.485792	0.384913	0.595784	0.61617	0.576028	0.72261	0.470179	0.79558	0.675048	0.340271	0.137	0.153731	0.294214	0.464734	0.129218	0.604541	0.641673	0.343216	0.194976	0.599958	0.245228	0.571482	0.746312	0.166634	0.586332	0.62274	0.347021	0.311792	0.147613	0.3544	0.479855	0.542691	0.154227	0.145381	0.138643	0.757941	0.133127	0.491942	0.16809	0.16604	0.733174	0.150199	0.159782
0f648ee2-215f-4758-9daa-8e7a73ce4cf0	5d11db29-925c-4cd5-a231-300507c63116	590	28	28	2025-08-23T11:02:13.000429Z	0.175442	0.846213	0.663893	1.03981	0.98986	0.973602	1.23837	0.809889	1.44633	1.16844	0.570056	0.163154	0.250032	0.574777	0.882464	0.210005	1.13583	1.20441	0.627304	0.379826	1.07355	0.441268	1.05103	1.40088	0.223147	1.04969	1.06631	0.623496	0.475285	0.191532	0.619306	0.912051	0.954774	0.199795	0.184162	0.175716	1.40286	0.167252	0.838678	0.2368	0.233297	1.25442	0.218471	0.227439
9bfd6b79-f087-4750-a1f4-67a383abc4df	5d11db29-925c-4cd5-a231-300507c63116	740	28	28	2025-08-23T11:02:29.000429Z	0.140098	0.501928	0.393779	0.605398	0.622396	0.58682	0.722213	0.482949	0.804325	0.677804	0.346502	0.136557	0.154408	0.304441	0.472652	0.129096	0.617772	0.648654	0.347241	0.198551	0.600299	0.247908	0.578673	0.748941	0.166342	0.598142	0.622821	0.352377	0.314401	0.147276	0.36222	0.482947	0.54314	0.15362	0.144686	0.13823	0.766677	0.133252	0.511076	0.168132	0.165765	0.734433	0.150107	0.159742
645c7ada-c8c6-462c-82cf-3f9a65c8928a	5d11db29-925c-4cd5-a231-300507c63116	590	28	28	2025-08-23T11:22:12.000429Z	0.174421	0.870575	0.68189	1.0576	0.999973	0.996084	1.24061	0.823451	1.46007	1.1793	0.581031	0.162344	0.249799	0.591564	0.896317	0.210691	1.14853	1.22138	0.629042	0.382158	1.07798	0.447091	1.06463	1.41694	0.222245	1.07525	1.07019	0.634584	0.480253	0.191323	0.631081	0.925883	0.958223	0.199699	0.18313	0.175215	1.42357	0.167348	0.875011	0.236871	0.233217	1.26797	0.21766	0.227634
5474cd23-3ce3-4dec-9b36-550bf4cd9b7b	5d11db29-925c-4cd5-a231-300507c63116	740	28	28	2025-08-23T11:22:28.000429Z	0.139488	0.514006	0.405091	0.611754	0.628009	0.597235	0.720377	0.488731	0.806215	0.68122	0.352661	0.136057	0.154583	0.31336	0.47939	0.128866	0.620512	0.652597	0.347939	0.199594	0.597651	0.251113	0.583306	0.753252	0.165679	0.609573	0.621751	0.357852	0.317563	0.147174	0.369806	0.487739	0.543271	0.153414	0.144018	0.137737	0.775133	0.133269	0.52964	0.168005	0.165531	0.735183	0.149831	0.159601
b61da369-109b-4db3-a423-b57321badf71	5d11db29-925c-4cd5-a231-300507c63116	590	28	28	2025-08-23T11:42:14.000429Z	0.173801	0.894149	0.691574	1.07424	1.00532	1.01672	1.24584	0.841169	1.45735	1.18734	0.591108	0.16147	0.250865	0.610787	0.909072	0.209789	1.16591	1.23043	0.619935	0.389461	1.0815	0.449394	1.08191	1.42848	0.221754	1.10578	1.07996	0.641972	0.486199	0.19106	0.64265	0.943387	0.962993	0.199292	0.181803	0.174524	1.43758	0.167513	0.913199	0.236605	0.233125	1.27483	0.212795	0.227476
81af6a4e-69f1-4862-b8b8-5b32001ad47c	5d11db29-925c-4cd5-a231-300507c63116	740	28	28	2025-08-23T11:42:30.000429Z	0.139065	0.526914	0.408995	0.617076	0.6301	0.607864	0.720499	0.498274	0.803548	0.684081	0.35867	0.135725	0.155252	0.32384	0.485177	0.128208	0.62745	0.655545	0.34372	0.202893	0.593517	0.255121	0.589387	0.757933	0.165298	0.62274	0.621839	0.362433	0.321426	0.147029	0.377216	0.493749	0.543894	0.153238	0.143282	0.137305	0.779176	0.133441	0.549702	0.167998	0.165409	0.734573	0.147951	0.159416
91eaf15d-c05a-4f41-87a7-9347f4e5b24e	5d11db29-925c-4cd5-a231-300507c63116	590	28	28	2025-08-23T12:02:14.000429Z	0.17355	0.914953	0.704672	1.08898	1.00646	1.0405	1.25368	0.852481	1.47679	1.19367	0.601204	0.161459	0.25152	0.627538	0.921137	0.211915	1.17067	1.23338	0.614569	0.400889	1.08648	0.450227	1.10196	1.44134	0.221406	1.13063	1.09499	0.659777	0.494018	0.191501	0.657419	0.950691	0.968438	0.199704	0.180958	0.174364	1.44745	0.167845	0.948583	0.237054	0.233668	1.28126	0.217377	0.227526
cc1d9f02-f05a-419d-a638-28f60054612a	5d11db29-925c-4cd5-a231-300507c63116	740	28	28	2025-08-23T12:02:30.000429Z	0.138782	0.538089	0.417623	0.620919	0.628316	0.619559	0.722696	0.503951	0.809365	0.685475	0.364373	0.135621	0.155447	0.333326	0.490669	0.128932	0.622755	0.653832	0.341296	0.207582	0.594162	0.256552	0.595979	0.760319	0.164933	0.633679	0.625436	0.3706	0.326327	0.146967	0.383879	0.496804	0.544912	0.153216	0.142627	0.136878	0.780421	0.133458	0.56763	0.167991	0.165315	0.733724	0.149184	0.159155
974a1e44-4efc-4494-8d45-43fd7715a72a	5d11db29-925c-4cd5-a231-300507c63116	590	28	28	2025-08-23T12:22:13.000429Z	0.173016	0.936023	0.718784	1.10087	1.00662	1.05968	1.2532	0.851385	1.49292	1.19964	0.611564	0.16082	0.252984	0.642784	0.930641	0.21253	1.20166	1.23712	0.613459	0.408898	1.08519	0.450835	1.13002	1.44251	0.221217	1.15747	1.10984	0.672786	0.503329	0.191229	0.664893	0.957831	0.973917	0.199735	0.179558	0.174278	1.45463	0.168359	0.978061	0.237645	0.233769	1.28672	0.218156	0.227463
29dec380-6639-4601-973b-116e1ac13aed	5d11db29-925c-4cd5-a231-300507c63116	740	28	28	2025-08-23T12:22:29.000429Z	0.138016	0.549566	0.423865	0.624104	0.625428	0.630707	0.723221	0.502748	0.816645	0.686718	0.370085	0.135642	0.156209	0.342017	0.496085	0.129484	0.633765	0.653536	0.340241	0.211356	0.588531	0.257544	0.605143	0.762285	0.16495	0.644353	0.630317	0.377603	0.33218	0.146935	0.390643	0.49907	0.546134	0.153236	0.141803	0.136288	0.78296	0.133834	0.581792	0.168247	0.16536	0.733001	0.149436	0.159171
eebcb2bf-8068-4ef7-b777-bb51988e71ca	5d11db29-925c-4cd5-a231-300507c63116	590	28	28	2025-08-23T12:42:14.000429Z	0.172254	0.953637	0.731236	1.12165	1.00711	1.07886	1.24908	0.875035	1.51116	1.20857	0.622112	0.160705	0.25356	0.649861	0.939919	0.213012	1.2263	1.24446	0.611377	0.413396	1.09287	0.454167	1.14766	1.442	0.218995	1.1803	1.12241	0.67938	0.514437	0.190899	0.672998	0.959206	0.978823	0.199351	0.178397	0.173587	1.45823	0.16853	1.00862	0.237622	0.23322	1.29541	0.223971	0.227271
787de33f-3466-4737-af76-37086aa9de59	5d11db29-925c-4cd5-a231-300507c63116	740	28	28	2025-08-23T12:42:30.000429Z	0.137972	0.560687	0.433221	0.628171	0.622461	0.639953	0.720821	0.515118	0.821833	0.68916	0.376498	0.135632	0.156219	0.347314	0.500278	0.12958	0.643179	0.654847	0.338889	0.215428	0.592146	0.259108	0.611451	0.755284	0.164707	0.654841	0.635178	0.382824	0.339216	0.146885	0.394954	0.496132	0.54739	0.153329	0.141161	0.136276	0.782929	0.134098	0.595269	0.168455	0.165135	0.734337	0.151627	0.159147
d361726c-ac57-42f3-a6fe-c3048be6b681	5d11db29-925c-4cd5-a231-300507c63116	590	28	28	2025-08-23T13:02:13.000429Z	0.172325	0.96828	0.745605	1.14963	1.00365	1.09821	1.24188	0.888482	1.5227	1.21853	0.633179	0.160345	0.255158	0.662456	0.950754	0.213001	1.24605	1.25091	0.610356	0.420065	1.11064	0.460401	1.17652	1.448	0.220108	1.19565	1.13499	0.68603	0.526799	0.191419	0.683983	0.960623	0.984214	0.199303	0.177387	0.175312	1.45996	0.168921	1.03443	0.238147	0.233813	1.30516	0.220924	0.227701
393d4dde-fa70-4e8d-beb8-544243b83128	5d11db29-925c-4cd5-a231-300507c63116	740	28	28	2025-08-23T13:02:29.000429Z	0.138216	0.568082	0.439146	0.637666	0.618057	0.647194	0.715795	0.519832	0.824596	0.690354	0.383484	0.134911	0.156565	0.353794	0.504884	0.129842	0.650836	0.655126	0.33695	0.216409	0.600218	0.260651	0.624863	0.753667	0.164389	0.665805	0.639218	0.388591	0.347209	0.146938	0.401092	0.493868	0.54781	0.153207	0.140418	0.136137	0.781164	0.134168	0.605892	0.168525	0.165266	0.736916	0.151438	0.159131
f7c70be5-3266-447c-bb21-6c3e9574cf28	5d11db29-925c-4cd5-a231-300507c63116	590	28	28	2025-08-23T13:22:12.000429Z	0.1717	0.982085	0.756703	1.15745	1.00063	1.10372	1.23823	0.888589	1.53338	1.22474	0.647763	0.159837	0.255996	0.681066	0.96104	0.213753	1.26321	1.26462	0.60955	0.438179	1.13455	0.461741	1.19219	1.45807	0.219926	1.21736	1.14629	0.701537	0.533346	0.191759	0.691744	0.961501	0.988595	0.199486	0.17685	0.172892	1.47051	0.169219	1.05435	0.238428	0.233786	1.31715	0.221287	0.227917
122e72a7-8c14-4c55-ae1f-2a13e7b59a06	5d11db29-925c-4cd5-a231-300507c63116	740	28	28	2025-08-23T13:22:28.000429Z	0.137485	0.577125	0.444723	0.641579	0.614751	0.651213	0.711413	0.519589	0.826643	0.690935	0.392517	0.134758	0.157058	0.363607	0.509168	0.13013	0.656079	0.659999	0.335888	0.228565	0.613409	0.263823	0.630212	0.75488	0.164582	0.674693	0.642428	0.39706	0.353981	0.147011	0.407421	0.491593	0.549195	0.153387	0.139884	0.135504	0.783015	0.134364	0.612776	0.16856	0.165354	0.740172	0.150615	0.159133
d7395964-9b89-4174-a84f-9307ee386523	5d11db29-925c-4cd5-a231-300507c63116	590	28	28	2025-08-23T13:42:15.000429Z	0.171674	0.99176	0.766523	1.17044	0.998653	1.11838	1.23821	0.91297	1.54552	1.22961	0.652001	0.158559	0.25646	0.703574	0.967803	0.214241	1.27039	1.27518	0.607699	0.437665	1.16274	0.463445	1.21236	1.47081	0.219767	1.23539	1.15633	0.709838	0.525572	0.191847	0.699568	0.962441	0.992199	0.199435	0.175465	0.172035	1.48433	0.169389	1.07436	0.238644	0.233637	1.3297	0.218576	0.22795
412daa29-7b96-465d-868c-95b6f5f62760	5d11db29-925c-4cd5-a231-300507c63116	740	28	28	2025-08-23T13:42:31.000429Z	0.136616	0.584236	0.450877	0.644906	0.611858	0.65444	0.707974	0.532089	0.82907	0.690932	0.396319	0.134203	0.157416	0.376078	0.512751	0.131201	0.655545	0.662644	0.334287	0.228519	0.625809	0.265729	0.6395	0.761673	0.164489	0.683418	0.645424	0.402277	0.35335	0.147227	0.411778	0.490122	0.549579	0.153348	0.139242	0.1351	0.786999	0.134611	0.617708	0.168889	0.165461	0.74412	0.148938	0.159278
dc45db8c-284e-497d-8fb6-b5d62b5a17f0	5d11db29-925c-4cd5-a231-300507c63116	590	28	28	2025-08-23T14:02:13.000429Z	0.170994	1.00546	0.768064	1.18723	0.997064	1.14038	1.23989	0.936076	1.55226	1.23471	0.655303	0.15849	0.257099	0.722945	0.975691	0.215826	1.2726	1.28653	0.608428	0.447904	1.19962	0.469562	1.22954	1.48061	0.219684	1.25097	1.16631	0.719509	0.497336	0.192698	0.707389	0.964028	0.996388	0.199757	0.174975	0.174377	1.49503	0.169882	1.09254	0.239072	0.234157	1.34208	0.218838	0.228221
c5c79c81-a487-4b1e-afce-f0e17e1e1fa3	5d11db29-925c-4cd5-a231-300507c63116	740	28	28	2025-08-23T14:02:29.000429Z	0.137012	0.589279	0.453475	0.649906	0.608944	0.660649	0.705877	0.541232	0.828165	0.690228	0.399585	0.133708	0.158025	0.387225	0.515982	0.131829	0.653318	0.665553	0.334046	0.232502	0.640909	0.266146	0.646807	0.762075	0.163658	0.691302	0.647901	0.407373	0.337564	0.147392	0.416631	0.489113	0.550984	0.153333	0.138855	0.134668	0.791314	0.134905	0.625079	0.168965	0.165377	0.749601	0.149589	0.159321
500c9656-f419-45b8-9566-0c0eca7dcde3	5d11db29-925c-4cd5-a231-300507c63116	590	28	28	2025-08-23T14:22:13.000429Z	0.170775	1.01269	0.780168	1.21134	0.995367	1.16177	1.24181	0.954591	1.54595	1.25703	0.663401	0.157638	0.257005	0.739406	0.983334	0.217618	1.28332	1.29079	0.608149	0.458234	1.2374	0.471198	1.25152	1.48874	0.219505	1.26098	1.17445	0.730406	0.463252	0.192809	0.713507	0.965442	1.0008	0.200157	0.174296	0.173437	1.5012	0.170386	1.11205	0.239107	0.23448	1.35687	0.222788	0.228241
4e416fb7-1bc1-4e54-a17d-9c088eca2e9f	5d11db29-925c-4cd5-a231-300507c63116	740	28	28	2025-08-23T14:22:29.000429Z	0.136738	0.592902	0.4604	0.657495	0.605778	0.66745	0.703832	0.549026	0.822215	0.6955	0.403679	0.133509	0.158007	0.397602	0.519464	0.13282	0.654326	0.665444	0.333655	0.237104	0.663766	0.269999	0.653585	0.764255	0.163603	0.699377	0.650007	0.413225	0.313935	0.147451	0.421268	0.487896	0.552008	0.15342	0.1384	0.134988	0.793963	0.135147	0.631247	0.168986	0.165438	0.75468	0.150352	0.159327
45989145-5ce9-42c0-b91b-20430438d0c7	5d11db29-925c-4cd5-a231-300507c63116	590	28	28	2025-08-23T14:42:12.000429Z	0.170648	1.02183	0.794119	1.22833	0.992589	1.17969	1.24325	0.956139	1.54521	1.26424	0.651159	0.157781	0.258556	0.748574	0.9915	0.220417	1.29613	1.3068	0.600887	0.462876	1.2714	0.4815	1.2617	1.49544	0.219245	1.26884	1.18	0.743135	0.439054	0.193133	0.719214	0.966442	1.00365	0.200302	0.173108	0.173838	1.5056	0.17055	1.12624	0.239218	0.234695	1.36933	0.223986	0.228089
94b868f3-8263-4b53-9f90-18fddb660873	5d11db29-925c-4cd5-a231-300507c63116	740	28	28	2025-08-23T14:42:28.000429Z	0.135902	0.595826	0.468201	0.663775	0.602551	0.674248	0.702419	0.551863	0.818263	0.70052	0.400907	0.133779	0.159268	0.403215	0.522691	0.133968	0.658215	0.670545	0.329398	0.239867	0.675505	0.276513	0.659258	0.766254	0.164567	0.704355	0.6517	0.420454	0.296353	0.147924	0.42567	0.487215	0.552739	0.153914	0.138068	0.134603	0.794334	0.135504	0.635986	0.169108	0.165639	0.759456	0.152852	0.159392
4849dfd1-01ac-47b8-9d1c-db5f5780517b	5d11db29-925c-4cd5-a231-300507c63116	590	28	28	2025-08-23T15:02:13.000429Z	0.169548	1.02587	0.80471	1.2301	0.991456	1.19724	1.24409	0.954746	1.55191	1.26581	0.643199	0.157558	0.2586	0.756565	0.999026	0.221205	1.31952	1.30784	0.595533	0.470386	1.28704	0.48772	1.26935	1.50199	0.219772	1.28459	1.18871	0.756026	0.426814	0.193881	0.726242	0.967787	1.00707	0.200237	0.172866	0.17299	1.50431	0.171034	1.14108	0.239997	0.235222	1.38159	0.221599	0.228579
574a16f0-9cb3-4c86-a2f9-fde20ab8c366	5d11db29-925c-4cd5-a231-300507c63116	740	28	28	2025-08-23T15:02:29.000429Z	0.136285	0.599048	0.474838	0.664091	0.600034	0.683429	0.700397	0.551321	0.818614	0.700222	0.399312	0.13321	0.159269	0.407938	0.525931	0.134195	0.665613	0.665941	0.326889	0.244396	0.683227	0.281233	0.658949	0.770313	0.165236	0.712019	0.653291	0.427298	0.286445	0.148253	0.426728	0.486501	0.553288	0.154208	0.137526	0.134432	0.793166	0.135965	0.639868	0.169602	0.166382	0.763272	0.14976	0.159767
9d1b71a0-739c-43e0-ab86-5f973f124460	5d11db29-925c-4cd5-a231-300507c63116	590	28	28	2025-08-23T15:22:12.000429Z	0.168736	1.03395	0.815431	1.22409	0.990071	1.21004	1.24518	0.954699	1.5642	1.26116	0.645728	0.156668	0.26037	0.766184	1.0061	0.218394	1.32615	1.29494	0.592513	0.475415	1.29726	0.500053	1.28541	1.50186	0.220205	1.30377	1.19446	0.768046	0.419662	0.194131	0.729394	0.96942	1.00887	0.200735	0.172467	0.171704	1.50016	0.171252	1.15737	0.240518	0.235944	1.39348	0.221211	0.228869
514d4b54-af13-497b-a30f-0f51e6e1a38c	5d11db29-925c-4cd5-a231-300507c63116	740	28	28	2025-08-23T15:22:28.000429Z	0.135954	0.600279	0.480895	0.661533	0.597468	0.686622	0.698468	0.549812	0.8204	0.696552	0.401192	0.132828	0.15974	0.413562	0.528303	0.132682	0.665214	0.659294	0.325239	0.245533	0.684348	0.288532	0.665648	0.768469	0.165738	0.715716	0.654267	0.434197	0.280327	0.148713	0.432046	0.485983	0.55378	0.154428	0.137513	0.135022	0.790378	0.136017	0.64604	0.169909	0.166505	0.768806	0.150169	0.159751
5e0df122-309c-45ef-acd4-11ad5d2d3771	5d11db29-925c-4cd5-a231-300507c63116	590	28	28	2025-08-23T15:42:13.000429Z	0.168369	1.04406	0.826709	1.21913	0.987955	1.22266	1.24514	0.975073	1.57577	1.27113	0.651205	0.156374	0.260479	0.767419	1.01133	0.215464	1.33417	1.31195	0.592963	0.478053	1.30384	0.507887	1.28207	1.5034	0.221177	1.3239	1.19992	0.779898	0.41609	0.19432	0.734896	0.970619	1.0109	0.201014	0.171307	0.172145	1.49216	0.17105	1.1869	0.240726	0.236526	1.40553	0.224093	0.228987
953f6c10-3f4a-4113-97c5-5ca2fd5e1efc	5d11db29-925c-4cd5-a231-300507c63116	740	28	28	2025-08-23T15:42:29.000429Z	0.135098	0.601684	0.486497	0.657871	0.594195	0.691996	0.697088	0.558314	0.823643	0.69294	0.404301	0.133096	0.160084	0.416801	0.530843	0.131747	0.665198	0.664562	0.324711	0.247186	0.68846	0.291713	0.658812	0.768719	0.165742	0.723541	0.655121	0.440703	0.277163	0.148931	0.434953	0.485138	0.554404	0.154663	0.137227	0.134465	0.783476	0.136222	0.660762	0.170139	0.16683	0.773617	0.150748	0.159931
0ac806ae-3bc4-4a3e-ba4a-1eb74ccca0fc	5d11db29-925c-4cd5-a231-300507c63116	590	28	28	2025-08-23T16:02:13.000429Z	0.168506	1.04906	0.834251	1.22139	0.986445	1.2326	1.24562	1.00435	1.58188	1.27673	0.657712	0.157408	0.262638	0.775783	1.01869	0.212896	1.34133	1.32055	0.59149	0.485556	1.31146	0.516755	1.2962	1.50286	0.220762	1.34418	1.20559	0.791249	0.414315	0.194874	0.742321	0.973047	1.01399	0.201396	0.171003	0.172867	1.48721	0.171994	1.20517	0.241228	0.236732	1.41634	0.221721	0.22954
bd48a341-3a93-47b3-b437-37f7966f70a1	5d11db29-925c-4cd5-a231-300507c63116	740	28	28	2025-08-23T16:02:29.000429Z	0.134656	0.601674	0.490687	0.656199	0.591317	0.696232	0.694737	0.573185	0.824502	0.695275	0.4079	0.133372	0.160976	0.420766	0.532668	0.130619	0.66456	0.663847	0.323903	0.250077	0.690223	0.297078	0.663568	0.768818	0.165773	0.73318	0.655527	0.447085	0.275354	0.148986	0.439754	0.484618	0.55456	0.15477	0.136495	0.134712	0.778529	0.136507	0.672728	0.170157	0.166823	0.778497	0.150909	0.159901
20757fb6-b773-47c0-a00a-59012ec8894f	5d11db29-925c-4cd5-a231-300507c63116	590	28	28	2025-08-23T16:22:13.000429Z	0.168208	1.06439	0.84518	1.22538	0.985233	1.24298	1.24547	1.00979	1.58603	1.28217	0.664796	0.157655	0.262569	0.782651	1.02526	0.213864	1.34966	1.32759	0.587604	0.488069	1.31692	0.522595	1.29707	1.50634	0.220501	1.37442	1.20652	0.803098	0.411586	0.195173	0.751211	0.97459	1.01454	0.201978	0.17068	0.171907	1.48406	0.172385	1.20755	0.241542	0.237376	1.42588	0.222901	0.229389
bb01f238-a509-47e2-bb4c-5d62c7c61a9c	5d11db29-925c-4cd5-a231-300507c63116	740	28	28	2025-08-23T16:22:29.000429Z	0.13417	0.606057	0.496699	0.655907	0.588864	0.700039	0.692593	0.573868	0.824604	0.695814	0.41209	0.133908	0.161327	0.426717	0.534818	0.131387	0.66375	0.664751	0.321871	0.251265	0.690356	0.303176	0.660917	0.767898	0.165784	0.745852	0.65452	0.453465	0.273415	0.148934	0.44398	0.484484	0.5543	0.154787	0.136381	0.133905	0.774064	0.136784	0.674311	0.170281	0.166925	0.782243	0.150351	0.1598
5fd09acc-7665-44ca-bce4-5a1af6679884	5d11db29-925c-4cd5-a231-300507c63116	590	28	28	2025-08-23T16:42:14.000429Z	0.168487	1.07135	0.852455	1.22827	0.984225	1.25039	1.24593	1.01974	1.58743	1.28659	0.677414	0.158015	0.26337	0.794212	1.03167	0.212694	1.35719	1.34115	0.59113	0.493664	1.32205	0.536566	1.30519	1.49492	0.221359	1.39237	1.20816	0.815296	0.408577	0.195146	0.760001	0.975537	1.01604	0.202387	0.170043	0.171552	1.48221	0.172611	1.21069	0.241768	0.237254	1.43514	0.225272	0.229257
ac6f671c-8eeb-42fe-9040-9bca2b45a3c9	5d11db29-925c-4cd5-a231-300507c63116	740	28	28	2025-08-23T16:42:30.000429Z	0.13383	0.608386	0.49989	0.655827	0.587051	0.703949	0.69055	0.578307	0.824312	0.694535	0.417824	0.134715	0.16191	0.432834	0.536858	0.132363	0.664561	0.669764	0.321823	0.254238	0.686517	0.313174	0.662856	0.769126	0.165932	0.749261	0.654019	0.460095	0.271753	0.149032	0.450055	0.483706	0.554728	0.154945	0.136007	0.13318	0.771407	0.136973	0.675015	0.170289	0.166921	0.785634	0.151661	0.159691
7f487c60-8009-4774-adaf-0dbfa5fde8d0	5d11db29-925c-4cd5-a231-300507c63116	590	28	28	2025-08-23T17:02:14.000429Z	0.167509	1.08906	0.863134	1.23157	0.984405	1.25946	1.24711	1.03572	1.5924	1.30504	0.68748	0.159067	0.264422	0.802283	1.03846	0.213343	1.36395	1.35941	0.588799	0.496807	1.32388	0.545853	1.31009	1.49011	0.221884	1.40261	1.20701	0.826885	0.40631	0.195762	0.768225	0.97683	1.01822	0.202722	0.169509	0.172167	1.47923	0.172728	1.22101	0.242351	0.237956	1.44315	0.228191	0.229436
fd8dd718-4fd5-4a06-b7b5-f2718f59304b	5d11db29-925c-4cd5-a231-300507c63116	740	28	28	2025-08-23T17:02:30.000429Z	0.134402	0.611968	0.509396	0.65458	0.584759	0.705495	0.689196	0.584975	0.823221	0.699915	0.423649	0.134996	0.162345	0.438681	0.538414	0.131767	0.665433	0.67678	0.320467	0.254931	0.689415	0.318741	0.661507	0.759971	0.165722	0.758101	0.652588	0.466125	0.269932	0.149195	0.453474	0.483269	0.5554	0.154899	0.135693	0.133541	0.767275	0.137127	0.677654	0.170407	0.167269	0.789418	0.15281	0.159671
2f839843-c844-4cb8-b75b-b22fd99281ae	5d11db29-925c-4cd5-a231-300507c63116	590	28	28	2025-08-23T17:22:12.000429Z	0.167661	1.10672	0.871667	1.23278	0.981899	1.26534	1.24746	1.05232	1.60232	1.27371	0.697393	0.159927	0.266558	0.812105	1.04387	0.214727	1.38203	1.38014	0.588009	0.499235	1.32146	0.551661	1.31286	1.49188	0.221791	1.38907	1.21113	0.838651	0.404439	0.196018	0.774466	0.977575	1.02047	0.202545	0.169236	0.173313	1.47954	0.173242	1.2561	0.242753	0.23843	1.4485	0.229011	0.23002
46f1c0b3-0bfb-48c2-b37d-2471c52a5b29	5d11db29-925c-4cd5-a231-300507c63116	740	28	28	2025-08-23T17:22:28.000429Z	0.133555	0.614897	0.512457	0.653391	0.582424	0.705845	0.687366	0.59178	0.825595	0.684939	0.429153	0.135469	0.162749	0.443477	0.539551	0.131669	0.670522	0.685105	0.321192	0.258523	0.688624	0.320503	0.660683	0.756759	0.165971	0.755799	0.652303	0.472825	0.268376	0.149349	0.457172	0.482707	0.556184	0.154932	0.135104	0.134006	0.765984	0.137338	0.689532	0.17065	0.167577	0.791828	0.152529	0.159835
32813c6d-87d7-43e2-85ac-d31537a4bbee	5d11db29-925c-4cd5-a231-300507c63116	590	28	28	2025-08-23T17:42:14.000429Z	0.165655	1.12186	0.886773	1.23317	0.981582	1.2707	1.24754	1.05847	1.61701	1.29595	0.705491	0.160736	0.266598	0.820022	1.04874	0.214569	1.40208	1.39006	0.58923	0.502329	1.31837	0.548256	1.31491	1.49485	0.221092	1.41686	1.21342	0.850798	0.401966	0.196017	0.781981	0.9789	1.02259	0.202113	0.168186	0.170514	1.48511	0.173192	1.29117	0.242941	0.238927	1.455	0.228575	0.229883
b3761b78-894a-4189-a1ce-02a1c7385fb6	5d11db29-925c-4cd5-a231-300507c63116	740	28	28	2025-08-23T17:42:30.000429Z	0.133533	0.618672	0.5203	0.652319	0.581071	0.706611	0.685468	0.598065	0.831762	0.691944	0.434392	0.135813	0.163165	0.448705	0.541077	0.131671	0.677195	0.688801	0.320512	0.260686	0.687354	0.318145	0.659776	0.756611	0.166101	0.758998	0.652441	0.479444	0.266954	0.149509	0.461553	0.482269	0.557106	0.155221	0.134727	0.133415	0.764258	0.137522	0.700051	0.170828	0.168024	0.794404	0.152602	0.159877
88fc3188-2b96-45a4-aca8-350f13264d6a	5d11db29-925c-4cd5-a231-300507c63116	590	28	28	2025-08-23T18:02:14.000429Z	0.165531	1.13325	0.901232	1.23389	0.981501	1.28509	1.24884	1.07163	1.62803	1.30084	0.714736	0.160673	0.267343	0.830678	1.05509	0.216381	1.41676	1.39812	0.590677	0.510422	1.31323	0.54387	1.31705	1.50035	0.22123	1.42394	1.21694	0.86182	0.400737	0.196664	0.790706	0.979536	1.02541	0.202793	0.167757	0.173215	1.48417	0.173488	1.31773	0.243613	0.240121	1.46113	0.230647	0.230434
03874873-8a3f-45e4-bf56-dcf3d3bf23e3	5d11db29-925c-4cd5-a231-300507c63116	740	28	28	2025-08-23T18:02:29.000429Z	0.132836	0.620414	0.527793	0.650216	0.579181	0.710505	0.683881	0.602653	0.835305	0.692099	0.439273	0.135826	0.163828	0.455464	0.542837	0.131981	0.681326	0.690947	0.320966	0.263854	0.683161	0.316054	0.657838	0.756249	0.166084	0.760788	0.653295	0.48533	0.265586	0.149653	0.46606	0.481575	0.558078	0.155194	0.134213	0.133079	0.76238	0.13754	0.707657	0.170933	0.168397	0.796961	0.15279	0.159911
2cfaa753-00d9-466d-8f91-e41be5ab1b43	5d11db29-925c-4cd5-a231-300507c63116	590	28	28	2025-08-23T18:22:12.000429Z	0.165463	1.14071	0.897814	1.23611	0.981786	1.29244	1.2491	1.06991	1.63498	1.3059	0.72368	0.161512	0.268758	0.844487	1.05924	0.220991	1.42457	1.40189	0.591034	0.506202	1.30665	0.542959	1.3177	1.50096	0.221423	1.43836	1.22162	0.87428	0.39876	0.196913	0.798137	0.980532	1.02781	0.202978	0.167378	0.171264	1.48464	0.173542	1.34501	0.244162	0.240737	1.46585	0.237321	0.230562
aca3b3b6-1394-49f5-9092-fc98ffed9cb9	5d11db29-925c-4cd5-a231-300507c63116	740	28	28	2025-08-23T18:22:28.000429Z	0.132919	0.62287	0.528096	0.648683	0.577966	0.714071	0.682361	0.600805	0.838187	0.692446	0.444553	0.135913	0.164237	0.461649	0.543786	0.134172	0.68463	0.691911	0.319622	0.262161	0.680227	0.316431	0.655671	0.75465	0.166046	0.76671	0.654708	0.491752	0.26415	0.149661	0.470014	0.481196	0.559021	0.155125	0.133882	0.132622	0.76045	0.137453	0.715682	0.171119	0.168615	0.798726	0.155399	0.15981
8a941489-97d2-4dea-a0f8-30d6588e5627	5d11db29-925c-4cd5-a231-300507c63116	590	28	28	2025-08-23T18:42:13.000429Z	0.165044	1.14551	0.912429	1.23671	0.981131	1.3039	1.24869	1.09191	1.63787	1.31972	0.728558	0.161155	0.269333	0.856058	1.06468	0.224079	1.43318	1.40354	0.591674	0.521256	1.30033	0.54183	1.31674	1.50438	0.221777	1.4528	1.22633	0.884774	0.397092	0.196891	0.806271	0.98057	1.02968	0.202961	0.166686	0.170919	1.48543	0.173571	1.36863	0.244634	0.241053	1.46967	0.235371	0.230365
f2e7d295-db28-4447-8768-e3f45586dab5	5d11db29-925c-4cd5-a231-300507c63116	740	28	28	2025-08-23T18:42:29.000429Z	0.133297	0.622815	0.53649	0.646906	0.576305	0.715179	0.680383	0.609545	0.839148	0.696434	0.449209	0.135768	0.164658	0.468285	0.544513	0.135584	0.686597	0.691487	0.320074	0.267429	0.67673	0.316122	0.654119	0.754422	0.166313	0.769804	0.65608	0.497605	0.262944	0.149832	0.474972	0.480304	0.560118	0.155062	0.133868	0.132613	0.757845	0.137553	0.722058	0.171359	0.169002	0.800606	0.155841	0.159823
08e794a6-a1fe-4d06-8416-a33f252a1896	5d11db29-925c-4cd5-a231-300507c63116	590	28	28	2025-08-23T19:02:13.000429Z	0.165132	1.15154	0.929019	1.23527	0.981614	1.32125	1.24952	1.08744	1.6392	1.32044	0.731452	0.160971	0.270645	0.867807	1.08099	0.224618	1.44124	1.39939	0.587298	0.52737	1.29778	0.540272	1.31777	1.50737	0.222049	1.46485	1.23003	0.896601	0.395915	0.197495	0.812804	0.982254	1.0331	0.20357	0.16649	0.171551	1.48637	0.174026	1.38592	0.245368	0.242033	1.46984	0.234261	0.231039
a27dc12e-ee20-41e2-8543-73032cbd5cb1	5d11db29-925c-4cd5-a231-300507c63116	740	28	28	2025-08-23T19:02:29.000429Z	0.132709	0.624446	0.540851	0.644084	0.575407	0.719363	0.67872	0.609525	0.840364	0.692782	0.452246	0.13562	0.165425	0.474187	0.548976	0.135387	0.689658	0.690852	0.31781	0.271651	0.672517	0.316272	0.651407	0.752994	0.166556	0.773931	0.657102	0.504362	0.261723	0.150007	0.4777	0.479866	0.561207	0.155411	0.133422	0.132274	0.75688	0.13766	0.725519	0.171588	0.169248	0.799547	0.152893	0.159866
1d3ad1f3-bca4-4f1b-805d-074d3697ac4b	5d11db29-925c-4cd5-a231-300507c63116	590	28	28	2025-08-23T19:22:12.000429Z	0.165025	1.16021	0.926157	1.23518	0.981756	1.32749	1.25063	1.09257	1.63963	1.33036	0.733948	0.160607	0.271772	0.879604	1.09253	0.225301	1.44857	1.38942	0.590399	0.53264	1.29548	0.541776	1.32164	1.50922	0.222258	1.47501	1.23307	0.906605	0.394649	0.198158	0.821184	0.982815	1.03548	0.203841	0.166146	0.171726	1.48735	0.174321	1.39458	0.245667	0.242905	1.46653	0.227859	0.231288
03676550-0733-4e54-8ee9-edfbdbd3cc51	5d11db29-925c-4cd5-a231-300507c63116	740	28	28	2025-08-23T19:22:28.000429Z	0.13266	0.625278	0.540345	0.64192	0.574194	0.719636	0.677692	0.609923	0.840256	0.694669	0.455736	0.13535	0.166093	0.480259	0.552837	0.136048	0.691974	0.686559	0.319266	0.274258	0.668986	0.317559	0.652674	0.752097	0.166827	0.774928	0.65771	0.510042	0.260905	0.150304	0.485353	0.479316	0.562826	0.155423	0.133247	0.132315	0.755448	0.137862	0.726786	0.171724	0.169857	0.797384	0.152294	0.160132
8e921ec7-a08f-432b-b739-6a97f6210d2e	5d11db29-925c-4cd5-a231-300507c63116	590	28	28	2025-08-23T19:42:14.000429Z	0.165187	1.16854	0.938158	1.2366	0.983436	1.33463	1.25009	1.10378	1.63858	1.33554	0.738139	0.159173	0.272077	0.887794	1.0996	0.223593	1.4544	1.37306	0.595039	0.540423	1.29494	0.543017	1.32301	1.50663	0.221234	1.47873	1.23316	0.91315	0.392934	0.198291	0.829192	0.983527	1.03877	0.203888	0.165398	0.174228	1.48739	0.174324	1.39522	0.245759	0.243677	1.45836	0.233043	0.231063
3ea7d76a-54f9-4354-80df-4a4ef4c4ec97	5d11db29-925c-4cd5-a231-300507c63116	740	28	28	2025-08-23T19:42:30.000429Z	0.132612	0.626316	0.550545	0.640461	0.573101	0.722028	0.67615	0.612761	0.839251	0.696455	0.459217	0.134931	0.167106	0.485028	0.555446	0.136098	0.692695	0.678688	0.320615	0.275981	0.667202	0.319536	0.651444	0.751363	0.166875	0.776883	0.657649	0.514285	0.26001	0.150614	0.487269	0.479367	0.564371	0.155394	0.133181	0.132791	0.754332	0.138112	0.725696	0.171928	0.170409	0.791994	0.154936	0.160145
5f33ff85-3788-4718-a055-38ed5d264858	5d11db29-925c-4cd5-a231-300507c63116	590	28	28	2025-08-23T20:02:13.000429Z	0.164434	1.17889	0.952012	1.23694	0.984474	1.34549	1.25117	1.11327	1.63228	1.3429	0.741512	0.159938	0.273326	0.904979	1.10567	0.222167	1.45765	1.3584	0.596197	0.535844	1.29635	0.546881	1.32285	1.51101	0.222169	1.49819	1.23405	0.913047	0.391734	0.198892	0.840393	0.985127	1.0414	0.204068	0.165981	0.172004	1.49073	0.174974	1.39924	0.246564	0.244493	1.445	0.233031	0.231505
418979da-7567-43cd-a487-0172928c1441	5d11db29-925c-4cd5-a231-300507c63116	740	28	28	2025-08-23T20:02:29.000429Z	0.131538	0.629463	0.554037	0.639362	0.572997	0.721871	0.674696	0.61726	0.836458	0.697768	0.462046	0.135087	0.167679	0.492994	0.558055	0.136464	0.694146	0.67177	0.320466	0.272968	0.66261	0.322042	0.65238	0.750918	0.167059	0.783995	0.657101	0.513488	0.259124	0.150783	0.492662	0.478812	0.566107	0.155598	0.133117	0.132263	0.752239	0.138289	0.725778	0.172142	0.170782	0.783429	0.156353	0.160295
7445358c-b3ae-4988-9d08-3e7dec11704b	5d11db29-925c-4cd5-a231-300507c63116	590	28	28	2025-08-23T20:22:13.000429Z	0.163525	1.18978	0.95299	1.23802	0.985369	1.35636	1.25132	1.13951	1.62732	1.34458	0.745893	0.159089	0.274647	0.920857	1.1082	0.218728	1.4603	1.35244	0.597166	0.528012	1.29207	0.54926	1.32507	1.5137	0.221855	1.50709	1.2354	0.90333	0.39041	0.199175	0.852522	0.987465	1.04448	0.205155	0.165167	0.173782	1.48755	0.174719	1.4067	0.246889	0.245616	1.43254	0.234826	0.231968
7a821298-a116-491a-9aba-f44b359d39e1	5d11db29-925c-4cd5-a231-300507c63116	740	28	28	2025-08-23T20:22:29.000429Z	0.132148	0.631643	0.556538	0.637326	0.572054	0.724638	0.673169	0.626273	0.831621	0.696363	0.465182	0.134426	0.167811	0.500348	0.557726	0.133902	0.694091	0.668875	0.320926	0.270174	0.661567	0.323181	0.648202	0.748834	0.166895	0.785533	0.65714	0.510649	0.258125	0.150849	0.497127	0.479071	0.5679	0.155942	0.132857	0.133109	0.748988	0.138305	0.726607	0.172332	0.171512	0.773415	0.156249	0.160444
29cd9c68-696b-4ede-87cf-d44e682c88b8	5d11db29-925c-4cd5-a231-300507c63116	590	28	28	2025-08-23T20:42:12.000429Z	0.163821	1.20145	0.969298	1.23657	0.985762	1.36007	1.25077	1.14895	1.62671	1.35176	0.75203	0.157755	0.275326	0.934801	1.11313	0.214365	1.45835	1.35316	0.600033	0.533845	1.29067	0.550208	1.32478	1.51029	0.221863	1.51613	1.23696	0.902697	0.388982	0.198971	0.860678	0.987819	1.04596	0.204341	0.163953	0.176607	1.48999	0.175017	1.41186	0.247073	0.246478	1.42311	0.237034	0.231428
47f22340-9d22-4767-9d89-99e5f5edda1e	5d11db29-925c-4cd5-a231-300507c63116	740	28	28	2025-08-23T20:42:28.000429Z	0.131873	0.634581	0.564494	0.635494	0.571527	0.723559	0.671487	0.633321	0.828959	0.698142	0.469035	0.133652	0.169178	0.507367	0.56029	0.1324	0.693383	0.667987	0.322209	0.273271	0.656961	0.323764	0.647651	0.747623	0.166916	0.786095	0.657218	0.510022	0.257394	0.150806	0.504325	0.4784	0.568831	0.155843	0.132632	0.132307	0.747574	0.138519	0.725629	0.17249	0.171967	0.766502	0.156667	0.160169
2917bff0-44ca-430c-b004-3b8cba3e987f	5d11db29-925c-4cd5-a231-300507c63116	590	28	28	2025-08-23T21:02:14.000429Z	0.164118	1.21046	0.983871	1.23698	0.987067	1.36683	1.25094	1.1525	1.62926	1.35557	0.75847	0.157571	0.276002	0.947436	1.1221	0.214635	1.45269	1.35861	0.600096	0.540601	1.29004	0.550408	1.3246	1.51265	0.222047	1.52293	1.24018	0.906277	0.387928	0.199743	0.872167	0.989334	1.04698	0.204859	0.164769	0.177321	1.48973	0.175515	1.4162	0.247658	0.247635	1.41987	0.236099	0.231556
6eac7b2a-201f-44e8-8ffe-24c11cb18b4b	5d11db29-925c-4cd5-a231-300507c63116	740	28	28	2025-08-23T21:02:30.000429Z	0.131177	0.637595	0.572412	0.634136	0.570713	0.724797	0.669822	0.634765	0.827455	0.696148	0.47267	0.134067	0.168857	0.513738	0.562513	0.132404	0.689757	0.669493	0.321313	0.276795	0.654767	0.323845	0.644686	0.745073	0.166781	0.785747	0.65774	0.512349	0.256333	0.150902	0.507451	0.478199	0.568925	0.155974	0.132786	0.132619	0.745203	0.138547	0.723306	0.17248	0.172384	0.760346	0.155944	0.160196
75bdad92-5b60-418d-9b7e-8d76cfa0ba95	5d11db29-925c-4cd5-a231-300507c63116	590	28	28	2025-08-23T21:22:12.000429Z	0.164006	1.22297	0.985965	1.23709	0.98827	1.3697	1.25137	1.16083	1.62984	1.35739	0.763436	0.156996	0.27631	0.964824	1.13116	0.212032	1.43826	1.36294	0.603447	0.543937	1.29082	0.549953	1.33381	1.51275	0.221966	1.52654	1.24116	0.914659	0.387062	0.200212	0.885549	0.99023	1.04859	0.204936	0.164239	0.177832	1.49031	0.17568	1.42014	0.248119	0.24823	1.41721	0.239206	0.231578
30fef0ff-1704-4af8-b469-819cc2da1b0a	5d11db29-925c-4cd5-a231-300507c63116	740	28	28	2025-08-23T21:22:28.000429Z	0.131605	0.638945	0.576825	0.632443	0.570194	0.723178	0.668199	0.638356	0.825899	0.695529	0.475984	0.133593	0.168995	0.522884	0.565744	0.131033	0.681471	0.670326	0.322161	0.275762	0.654387	0.323981	0.645524	0.744112	0.166716	0.784036	0.656917	0.516113	0.255762	0.151188	0.515408	0.477898	0.569718	0.155801	0.132513	0.133184	0.74494	0.138628	0.721709	0.1727	0.172713	0.756881	0.156167	0.160056
24216e0d-a970-4ede-b7b9-a65dd88f3708	5d11db29-925c-4cd5-a231-300507c63116	590	28	28	2025-08-23T21:42:13.000429Z	0.163272	1.22668	1.00395	1.23825	0.988933	1.37404	1.25173	1.17206	1.63291	1.36534	0.767387	0.156645	0.276202	0.983653	1.14038	0.211832	1.43411	1.36894	0.605957	0.542693	1.28778	0.550037	1.33506	1.51842	0.221711	1.52927	1.24379	0.922262	0.385938	0.200377	0.894628	0.991533	1.0499	0.205276	0.163598	0.175746	1.48989	0.175531	1.42888	0.248205	0.248503	1.41577	0.237792	0.231477
93d5971a-3bf0-45ca-83c0-a1b7af144e6a	5d11db29-925c-4cd5-a231-300507c63116	740	28	28	2025-08-23T21:42:29.000429Z	0.131693	0.641813	0.584765	0.631128	0.569148	0.723958	0.667112	0.639144	0.824496	0.696776	0.479786	0.133311	0.168896	0.5314	0.567331	0.130447	0.677088	0.670946	0.323566	0.278968	0.65188	0.324271	0.645188	0.743035	0.166847	0.781681	0.657524	0.520487	0.255146	0.151417	0.520792	0.477872	0.570335	0.156249	0.132281	0.133323	0.743109	0.13858	0.72137	0.172793	0.172946	0.754009	0.154926	0.160104
47797ea2-a339-4e7f-a769-2bc0cf75754e	5d11db29-925c-4cd5-a231-300507c63116	590	28	28	2025-08-23T22:02:14.000429Z	0.164284	1.23371	1.02052	1.23629	0.989005	1.37967	1.25186	1.17716	1.63164	1.37001	0.772011	0.156616	0.276433	0.995312	1.14437	0.20857	1.43048	1.36951	0.602092	0.544801	1.28957	0.550848	1.33554	1.51643	0.222349	1.53201	1.24413	0.933656	0.384942	0.200846	0.903473	0.992671	1.05117	0.205592	0.164145	0.179538	1.49153	0.175702	1.44359	0.248852	0.249229	1.41392	0.234057	0.231979
9fdcf90b-4a47-44c5-a877-bdf4ab43f7c5	5d11db29-925c-4cd5-a231-300507c63116	740	28	28	2025-08-23T22:02:30.000429Z	0.131817	0.642898	0.591402	0.629198	0.568421	0.724625	0.665282	0.642278	0.822257	0.698901	0.482675	0.132993	0.169042	0.537066	0.567879	0.129226	0.674405	0.670294	0.321162	0.275198	0.649698	0.324788	0.644533	0.740947	0.166995	0.778686	0.656523	0.526075	0.2543	0.151518	0.523456	0.477576	0.570717	0.156175	0.132361	0.133282	0.741248	0.138632	0.725025	0.172996	0.173105	0.751332	0.154083	0.160212
00847c18-0b51-418c-9822-9e64ba345e5e	5d11db29-925c-4cd5-a231-300507c63116	590	28	28	2025-08-23T22:22:13.000429Z	0.164217	1.24049	1.03437	1.23683	0.990022	1.38701	1.25208	1.1934	1.6316	1.36823	0.779377	0.155287	0.27696	1.00647	1.15458	0.207999	1.43048	1.37171	0.607321	0.543823	1.28645	0.551474	1.3402	1.51728	0.222509	1.53673	1.24464	0.94261	0.384058	0.201196	0.907466	0.994375	1.05163	0.206017	0.163821	0.176807	1.49437	0.175525	1.45957	0.249202	0.250114	1.41316	0.235284	0.232163
6d4c4d8b-7dd6-4f0b-b634-da5ff257356b	5d11db29-925c-4cd5-a231-300507c63116	740	28	28	2025-08-23T22:22:29.000429Z	0.132239	0.645268	0.597114	0.627821	0.568042	0.727116	0.663792	0.650736	0.820929	0.697481	0.485733	0.132765	0.169497	0.542248	0.572053	0.130033	0.673255	0.669497	0.323779	0.277303	0.645606	0.325347	0.647277	0.743104	0.167209	0.776587	0.655943	0.530152	0.253501	0.15162	0.52757	0.477526	0.570905	0.156617	0.132064	0.133179	0.739851	0.138408	0.728393	0.173154	0.173492	0.748802	0.155212	0.160211
b71bbceb-2a4b-4508-8a10-4edd1b23a1b0	5d11db29-925c-4cd5-a231-300507c63116	590	28	28	2025-08-23T22:42:14.000429Z	0.163809	1.2438	1.04686	1.23744	0.990937	1.3936	1.25195	1.20625	1.63093	1.37027	0.782575	0.154947	0.276474	1.03719	1.16478	0.208082	1.43119	1.37348	0.610066	0.540076	1.2857	0.551201	1.34347	1.51765	0.222181	1.54089	1.24415	0.950595	0.383296	0.200903	0.910529	0.993954	1.05211	0.2061	0.162995	0.179814	1.4905	0.175251	1.47055	0.249328	0.250649	1.41331	0.23378	0.232134
350be279-cd9d-4657-969e-d1bf14f7d9bb	5d11db29-925c-4cd5-a231-300507c63116	740	28	28	2025-08-23T22:42:30.000429Z	0.132168	0.646249	0.603446	0.62667	0.567671	0.728221	0.66257	0.653314	0.818679	0.697578	0.488972	0.132524	0.169368	0.554058	0.574375	0.129231	0.671044	0.669052	0.325162	0.27825	0.645582	0.325708	0.643537	0.737531	0.16718	0.775464	0.655068	0.534825	0.253008	0.151618	0.527477	0.477237	0.571247	0.156628	0.132047	0.133448	0.737061	0.138401	0.730547	0.173295	0.17388	0.746955	0.154029	0.160227
fbdaaa7e-820a-4706-8fce-57d1d4f31822	5d11db29-925c-4cd5-a231-300507c63116	590	28	28	2025-08-23T23:02:13.000429Z	0.164427	1.25368	1.05802	1.23799	0.990872	1.39964	1.25208	1.21415	1.63463	1.36893	0.78765	0.155022	0.276823	1.03943	1.17195	0.2087	1.43247	1.37549	0.611913	0.542852	1.28789	0.552642	1.34679	1.51846	0.222361	1.54864	1.24508	0.962246	0.383432	0.2016	0.920545	0.995768	1.05402	0.206557	0.163031	0.178802	1.48825	0.17543	1.48024	0.249928	0.251637	1.4138	0.233532	0.232684
fe996217-467f-4035-9112-903f63fd7cdd	5d11db29-925c-4cd5-a231-300507c63116	740	28	28	2025-08-23T23:02:29.000429Z	0.132114	0.649877	0.607968	0.625271	0.566555	0.728403	0.660918	0.659749	0.818316	0.698007	0.49168	0.132317	0.16955	0.556247	0.577798	0.130011	0.669831	0.667678	0.323702	0.279132	0.644052	0.32638	0.642615	0.735176	0.167229	0.775838	0.6539	0.539429	0.252896	0.151749	0.531952	0.477011	0.571682	0.156548	0.131783	0.133426	0.735396	0.138501	0.732206	0.173424	0.174352	0.744918	0.15356	0.160342
2a3a0acb-63db-4721-b77a-7d3c6559c8a4	5d11db29-925c-4cd5-a231-300507c63116	590	28	28	2025-08-23T23:22:13.000429Z	0.16529	1.26303	1.07049	1.23871	0.991529	1.40543	1.25181	1.22243	1.63851	1.36919	0.792673	0.154561	0.276608	1.0765	1.17897	0.207843	1.4328	1.37359	0.611178	0.539755	1.29285	0.55328	1.34583	1.51761	0.221046	1.55803	1.2437	0.975965	0.383286	0.201831	0.921943	0.997435	1.05621	0.206767	0.16322	0.179752	1.49456	0.175632	1.49008	0.250371	0.252367	1.41294	0.23457	0.233167
9c0c8960-2da5-48b6-bf9b-7004e8061a6d	5d11db29-925c-4cd5-a231-300507c63116	740	28	28	2025-08-23T23:22:29.000429Z	0.132817	0.649942	0.613631	0.624008	0.565707	0.728611	0.659589	0.662767	0.818289	0.695396	0.494816	0.131793	0.169183	0.572083	0.579182	0.129505	0.668823	0.666159	0.324211	0.275894	0.643983	0.326303	0.643076	0.734351	0.167079	0.778275	0.653487	0.544222	0.25231	0.151854	0.530498	0.477102	0.572464	0.156653	0.13167	0.133984	0.734695	0.138508	0.734539	0.173678	0.174742	0.743415	0.154811	0.160498
2fbc7d88-a466-4f92-87dd-45af0d479092	5d11db29-925c-4cd5-a231-300507c63116	590	28	28	2025-08-23T23:42:15.000429Z	0.167006	1.26804	1.08367	1.23857	0.990507	1.4102	1.25132	1.22518	1.63622	1.37292	0.80009	0.153223	0.276318	1.08699	1.18245	0.206378	1.43057	1.36988	0.614875	0.551475	1.29002	0.55203	1.347	1.51672	0.223226	1.56956	1.2445	0.986709	0.382447	0.20156	0.923453	0.997526	1.05737	0.206191	0.161945	0.18323	1.49669	0.175746	1.49882	0.250551	0.25275	1.41113	0.237263	0.232984
d6c20bc0-c9d3-4439-9c82-319fbd1b3165	5d11db29-925c-4cd5-a231-300507c63116	740	28	28	2025-08-23T23:42:31.000429Z	0.132835	0.650269	0.617065	0.622941	0.564092	0.728503	0.65831	0.661567	0.815432	0.696726	0.498177	0.131486	0.168808	0.579358	0.579809	0.129033	0.666157	0.662412	0.325092	0.280473	0.642596	0.326153	0.64329	0.733071	0.167022	0.782372	0.652998	0.549423	0.251948	0.151886	0.531547	0.476533	0.573153	0.156229	0.13162	0.134294	0.736026	0.138566	0.736467	0.173778	0.175254	0.741555	0.156435	0.160639
2c44f7c6-2895-4917-bfcf-f7afaaedbc01	5d11db29-925c-4cd5-a231-300507c63116	590	28	28	2025-08-24T00:02:13.000429Z	0.166633	1.27736	1.0824	1.24172	0.990013	1.41487	1.25158	1.23084	1.64007	1.37174	0.805576	0.153318	0.27554	1.10858	1.18727	0.204427	1.42661	1.37219	0.615572	0.55202	1.29051	0.553008	1.35037	1.51704	0.223023	1.58017	1.24358	0.998419	0.382627	0.202084	0.925719	1.00018	1.06015	0.206908	0.161975	0.185086	1.50341	0.175502	1.50931	0.251113	0.253891	1.413	0.236125	0.233576
1e74774e-fb86-42f3-a750-ebf313e6b641	5d11db29-925c-4cd5-a231-300507c63116	740	28	28	2025-08-24T00:02:29.000429Z	0.134314	0.653535	0.6148	0.622576	0.563293	0.729406	0.656997	0.6635	0.814913	0.693875	0.500856	0.131497	0.168235	0.587364	0.580972	0.128305	0.663173	0.662411	0.325241	0.282089	0.639502	0.326056	0.641681	0.729912	0.16719	0.785873	0.651447	0.555342	0.251879	0.151811	0.533758	0.476714	0.573721	0.156514	0.13131	0.133888	0.734647	0.138259	0.739148	0.173735	0.175548	0.739501	0.155048	0.160673
3c1b4bf6-f337-49a2-a6d1-5057bec22706	5d11db29-925c-4cd5-a231-300507c63116	590	28	28	2025-08-24T00:22:12.000429Z	0.166567	1.28093	1.08782	1.24378	0.989599	1.42306	1.25174	1.23181	1.63357	1.37422	0.808828	0.153378	0.274206	1.10568	1.1949	0.204063	1.42802	1.37403	0.617314	0.554268	1.28418	0.553459	1.35708	1.51933	0.222583	1.58754	1.24233	1.00499	0.382804	0.202181	0.92459	1.00054	1.06038	0.207101	0.161705	0.184308	1.50146	0.175941	1.52036	0.251355	0.25465	1.41169	0.230804	0.233448
054182ce-af53-414e-a592-cacdfdc9260c	5d11db29-925c-4cd5-a231-300507c63116	740	28	28	2025-08-24T00:22:29.000429Z	0.133888	0.65526	0.620009	0.622176	0.562402	0.729483	0.65586	0.664536	0.812364	0.695225	0.504284	0.130838	0.168084	0.587221	0.582817	0.128029	0.66129	0.660852	0.325877	0.284162	0.635874	0.326276	0.644637	0.732541	0.167275	0.788891	0.650368	0.558843	0.252003	0.151952	0.533282	0.47618	0.57303	0.156411	0.131221	0.133818	0.732995	0.138404	0.742018	0.173851	0.176055	0.738928	0.151065	0.160571
3d29196c-e88a-44fe-b210-b2cb386d70d6	5d11db29-925c-4cd5-a231-300507c63116	590	28	28	2025-08-24T00:42:14.000429Z	0.167827	1.28722	1.10259	1.24667	0.990098	1.42801	1.25101	1.24134	1.64103	1.3834	0.815494	0.15218	0.273509	1.12678	1.20033	0.202603	1.42286	1.36937	0.614933	0.555713	1.28579	0.554062	1.35402	1.51628	0.221537	1.59299	1.2424	1.01818	0.38287	0.2023	0.925343	1.00148	1.06254	0.206459	0.16174	0.181943	1.50506	0.17559	1.53274	0.251452	0.255087	1.41085	0.229924	0.233584
a6544ed1-b536-4758-99d3-e7564a122158	5d11db29-925c-4cd5-a231-300507c63116	740	28	28	2025-08-24T00:42:30.000429Z	0.135159	0.65655	0.62362	0.621742	0.561224	0.730396	0.65467	0.668659	0.812828	0.695944	0.506558	0.130862	0.167269	0.597082	0.583414	0.127163	0.659661	0.659057	0.325042	0.283862	0.635443	0.326818	0.642941	0.727186	0.167409	0.791337	0.649471	0.564408	0.251752	0.152023	0.530196	0.476044	0.574452	0.156627	0.131137	0.134458	0.73209	0.138392	0.745806	0.173935	0.176296	0.736539	0.150503	0.160841
4eb2816f-8495-4427-8221-8bc5e2a057b3	5d11db29-925c-4cd5-a231-300507c63116	590	28	28	2025-08-24T01:02:13.000429Z	0.168257	1.29399	1.12237	1.25001	0.988926	1.43505	1.25184	1.24649	1.64239	1.38858	0.819872	0.15213	0.273704	1.13784	1.21032	0.203975	1.42708	1.37135	0.621706	0.55387	1.28422	0.554696	1.36042	1.51544	0.223227	1.5982	1.24215	1.02404	0.383329	0.202834	0.921632	1.00273	1.06472	0.207478	0.161066	0.186385	1.49922	0.175842	1.54348	0.251693	0.2561	1.41117	0.242553	0.23421
db3d3922-aeaf-4561-ab4f-c450fd371abf	5d11db29-925c-4cd5-a231-300507c63116	740	28	28	2025-08-24T01:02:30.000429Z	0.135739	0.656046	0.634873	0.621836	0.55957	0.731503	0.653583	0.669462	0.81074	0.697554	0.509342	0.130629	0.166452	0.60209	0.58592	0.127369	0.657297	0.657788	0.327582	0.281356	0.633681	0.326688	0.643197	0.725567	0.167569	0.792685	0.648442	0.567527	0.251874	0.15216	0.529704	0.476162	0.575283	0.156265	0.130985	0.135024	0.728617	0.138432	0.74941	0.173927	0.176784	0.735044	0.155854	0.160793
f750cbc4-3ab0-478b-aee8-5dd4983e9af4	5d11db29-925c-4cd5-a231-300507c63116	590	28	28	2025-08-24T01:22:13.000429Z	0.169799	1.30018	1.14359	1.25285	0.988358	1.4389	1.25142	1.25133	1.64302	1.39221	0.824448	0.152	0.271582	1.16197	1.21674	0.203256	1.42673	1.3757	0.622196	0.556366	1.28259	0.554162	1.36006	1.51772	0.223484	1.60088	1.24015	1.03245	0.383518	0.202954	0.922091	1.00332	1.06633	0.206904	0.160637	0.183956	1.49926	0.175834	1.5544	0.251988	0.256438	1.41101	0.228784	0.234182
acb8bc45-055d-4198-8891-4ae05aac4107	5d11db29-925c-4cd5-a231-300507c63116	740	28	28	2025-08-24T01:22:29.000429Z	0.136854	0.659808	0.643175	0.621465	0.558675	0.731994	0.652842	0.673289	0.810947	0.697754	0.511908	0.130478	0.166257	0.609484	0.588424	0.128184	0.657939	0.657658	0.327398	0.286579	0.631975	0.326334	0.641859	0.723053	0.167667	0.793059	0.646832	0.571366	0.251914	0.15209	0.528821	0.47556	0.576432	0.156405	0.130969	0.134614	0.727441	0.138219	0.752794	0.174078	0.176884	0.73336	0.150288	0.160716
ac75fcaf-63a0-4b67-ba0b-98d81f19b893	5d11db29-925c-4cd5-a231-300507c63116	590	28	28	2025-08-24T01:42:14.000429Z	0.170831	1.30318	1.15827	1.25659	0.987785	1.444	1.25115	1.25897	1.64345	1.3951	0.828955	0.151312	0.270666	1.19061	1.21907	0.202891	1.42759	1.38184	0.624614	0.548095	1.27907	0.554725	1.36489	1.51658	0.223727	1.60477	1.23938	1.04634	0.384381	0.203124	0.924694	1.00488	1.0685	0.206711	0.160643	0.184614	1.49855	0.175855	1.56486	0.252004	0.257451	1.4114	0.240998	0.234498
f134b616-c193-476a-919d-6beb331d4852	5d11db29-925c-4cd5-a231-300507c63116	740	28	28	2025-08-24T01:42:30.000429Z	0.137202	0.661819	0.650109	0.621943	0.557618	0.732804	0.651633	0.675546	0.808984	0.698581	0.514418	0.129966	0.165254	0.621976	0.588213	0.127644	0.654713	0.658986	0.328434	0.280541	0.630204	0.326762	0.644721	0.722165	0.167605	0.793742	0.646323	0.57632	0.252443	0.152249	0.532306	0.476112	0.577548	0.156107	0.131138	0.135658	0.725525	0.138419	0.756608	0.174045	0.177509	0.732626	0.155047	0.161234
ceb12ede-ec05-467d-bf78-24bafd30b2e6	5d11db29-925c-4cd5-a231-300507c63116	590	28	28	2025-08-24T02:02:13.000429Z	0.171939	1.31396	1.17218	1.2604	0.987289	1.44847	1.2518	1.26536	1.64267	1.3951	0.835264	0.151367	0.2699	1.20226	1.22095	0.202602	1.42553	1.37895	0.622362	0.55687	1.27625	0.555191	1.36984	1.51637	0.224211	1.61149	1.24133	1.05491	0.384646	0.203514	0.930065	1.0061	1.07056	0.206934	0.160578	0.186004	1.49817	0.175878	1.57501	0.252228	0.257931	1.41112	0.236287	0.234843
868b440c-3656-425c-91ce-445586727a1b	5d11db29-925c-4cd5-a231-300507c63116	740	28	28	2025-08-24T02:02:29.000429Z	0.138158	0.665426	0.65555	0.621733	0.556257	0.732944	0.650851	0.67768	0.806782	0.698388	0.516885	0.129814	0.164815	0.626436	0.58811	0.127194	0.652816	0.657423	0.32703	0.283544	0.627059	0.32695	0.64515	0.72044	0.167816	0.795765	0.646699	0.579135	0.252033	0.152191	0.53277	0.475591	0.578353	0.156049	0.131053	0.135775	0.72387	0.138192	0.759691	0.174032	0.177704	0.731032	0.153132	0.161144
9eb5f31f-12e7-40d6-a440-46b6a9a77723	5d11db29-925c-4cd5-a231-300507c63116	590	28	28	2025-08-24T02:22:12.000429Z	0.173206	1.32598	1.18791	1.26546	0.987117	1.45342	1.25251	1.2722	1.64144	1.39574	0.840452	0.151308	0.269779	1.2242	1.22446	0.201874	1.42844	1.37603	0.627338	0.565025	1.27582	0.555636	1.37023	1.5153	0.222667	1.61487	1.24151	1.0561	0.385512	0.203638	0.92949	1.00706	1.07201	0.207137	0.160626	0.185894	1.49762	0.175643	1.584	0.252641	0.258392	1.41026	0.242268	0.235112
f835293d-6a37-4930-8a3c-44e836b5be16	5d11db29-925c-4cd5-a231-300507c63116	740	28	28	2025-08-24T02:22:28.000429Z	0.13912	0.668172	0.66201	0.622893	0.555318	0.733971	0.650488	0.681633	0.80514	0.698832	0.519831	0.129701	0.164457	0.635761	0.58887	0.127216	0.652525	0.654011	0.328762	0.289789	0.625637	0.327014	0.644983	0.718783	0.167857	0.795945	0.64588	0.579233	0.252735	0.152258	0.533498	0.475561	0.578897	0.156236	0.13121	0.135904	0.7221	0.138089	0.762629	0.174302	0.177859	0.72947	0.155372	0.161138
6ce95100-f0bc-4f07-9783-36e127d85abd	5d11db29-925c-4cd5-a231-300507c63116	590	28	28	2025-08-24T02:42:15.000429Z	0.174451	1.3279	1.20257	1.26744	0.985421	1.4563	1.25292	1.27942	1.64347	1.39607	0.845163	0.150345	0.269161	1.25263	1.22871	0.201178	1.43453	1.37765	0.625876	0.553929	1.27449	0.55587	1.37645	1.51455	0.224428	1.62026	1.23683	1.06289	0.385449	0.203689	0.932969	1.00743	1.07408	0.206687	0.160079	0.18686	1.49816	0.175432	1.59023	0.252644	0.258935	1.40932	0.240266	0.234874
3e9c7c32-f36f-4503-9154-6c9469823952	5d11db29-925c-4cd5-a231-300507c63116	740	28	28	2025-08-24T02:42:33.000429Z	0.140557	0.670151	0.668154	0.622714	0.554199	0.734238	0.649544	0.685119	0.804529	0.699084	0.522499	0.1294	0.164516	0.646874	0.590303	0.126844	0.653568	0.654337	0.329097	0.287689	0.624305	0.327196	0.646743	0.716968	0.168188	0.797284	0.644127	0.584412	0.253145	0.152454	0.534837	0.475533	0.580131	0.156074	0.131223	0.136367	0.721026	0.138069	0.764753	0.174362	0.17825	0.728068	0.156361	0.161215
c0078413-3cbf-409a-b648-69c2f04abbca	5d11db29-925c-4cd5-a231-300507c63116	590	28	28	2025-08-24T03:02:14.000429Z	0.176516	1.33971	1.21731	1.27133	0.985448	1.46032	1.25365	1.2852	1.64225	1.39654	0.849027	0.150656	0.26878	1.2692	1.23288	0.200452	1.43812	1.3776	0.625448	0.571574	1.279	0.555993	1.38032	1.5148	0.225419	1.62545	1.2378	1.06777	0.385877	0.204152	0.937147	1.00869	1.07752	0.206874	0.160162	0.192532	1.49889	0.175651	1.59477	0.253368	0.259519	1.40929	0.240359	0.235388
7d4130d0-c80e-412f-9b02-7c9bbd97ae31	5d11db29-925c-4cd5-a231-300507c63116	740	28	28	2025-08-24T03:02:30.000429Z	0.141456	0.675699	0.67281	0.623692	0.5532	0.734958	0.648881	0.689289	0.803216	0.699641	0.524986	0.12926	0.16424	0.653232	0.591359	0.126282	0.653499	0.653142	0.328532	0.294805	0.622802	0.326761	0.646408	0.71516	0.168563	0.798348	0.643937	0.586433	0.252961	0.152505	0.536597	0.475377	0.581733	0.156256	0.13134	0.136539	0.72002	0.138099	0.76601	0.174616	0.178434	0.726826	0.158196	0.161132
eaea060d-241e-48a4-ad8c-1fbe9e534d5e	5d11db29-925c-4cd5-a231-300507c63116	590	28	28	2025-08-24T03:22:13.000429Z	0.177615	1.34103	1.2302	1.27355	0.984267	1.46364	1.25483	1.29367	1.64564	1.38867	0.853495	0.150387	0.270331	1.29127	1.23638	0.200933	1.43789	1.37792	0.628927	0.573059	1.27603	0.556226	1.38486	1.51459	0.223956	1.62823	1.23851	1.0723	0.386322	0.204326	0.940276	1.00959	1.08002	0.207503	0.160165	0.19143	1.49637	0.175813	1.59675	0.253496	0.260228	1.41007	0.241085	0.235304
898dd345-fb49-4aa0-bf85-55205be772b2	5d11db29-925c-4cd5-a231-300507c63116	740	28	28	2025-08-24T03:22:29.000429Z	0.142426	0.67701	0.678753	0.624253	0.551662	0.734527	0.648536	0.69089	0.801753	0.696073	0.525094	0.128983	0.166429	0.662416	0.59273	0.126845	0.651334	0.650662	0.329268	0.291831	0.622251	0.326667	0.648203	0.714069	0.168206	0.799386	0.643783	0.588786	0.253245	0.152641	0.540055	0.475391	0.582846	0.15616	0.131427	0.137473	0.719739	0.138199	0.766267	0.174671	0.178929	0.726109	0.15737	0.161236
875b6b13-bedb-4915-9d09-e17739a5d1d3	5d11db29-925c-4cd5-a231-300507c63116	590	28	28	2025-08-24T03:42:13.000429Z	0.179163	1.33588	1.24391	1.27583	0.982683	1.46891	1.25488	1.30121	1.64546	1.38755	0.865872	0.149514	0.26952	1.30567	1.24094	0.200692	1.43236	1.37742	0.63314	0.574665	1.2777	0.55603	1.39728	1.51594	0.225127	1.63319	1.23684	1.08286	0.387265	0.20397	0.946827	1.00994	1.08243	0.207419	0.158993	0.19256	1.49602	0.175821	1.59752	0.253365	0.260757	1.41018	0.235649	0.235109
9e6edda9-0d68-4979-80af-ef154af73b4f	5d11db29-925c-4cd5-a231-300507c63116	740	28	28	2025-08-24T03:42:29.000429Z	0.143064	0.676041	0.683435	0.624202	0.551142	0.736276	0.64783	0.693233	0.800621	0.693948	0.532504	0.128878	0.165814	0.668209	0.593901	0.126963	0.64821	0.649436	0.330527	0.292458	0.619647	0.326461	0.649298	0.713147	0.168238	0.800879	0.641844	0.592277	0.25394	0.152632	0.542086	0.475031	0.583707	0.156111	0.13119	0.137504	0.717576	0.138153	0.765678	0.174571	0.179348	0.724949	0.155294	0.161242
a1cdbfed-c1b3-4148-b714-59941e7513e1	5d11db29-925c-4cd5-a231-300507c63116	590	28	28	2025-08-24T04:02:12.000429Z	0.181504	1.33238	1.25895	1.27724	0.983049	1.47141	1.25586	1.30775	1.64404	1.37102	0.870182	0.150082	0.267542	1.32777	1.24413	0.200673	1.43159	1.37879	0.632834	0.57986	1.28142	0.557192	1.40069	1.5158	0.225621	1.63294	1.23704	1.09093	0.387715	0.204813	0.955884	1.01205	1.08546	0.208148	0.159556	0.19088	1.49552	0.175976	1.59651	0.25385	0.261868	1.41041	0.234943	0.235823
63e2de69-26b9-4a3d-921f-598d3ebb66c2	5d11db29-925c-4cd5-a231-300507c63116	740	28	28	2025-08-24T04:02:29.000429Z	0.144562	0.67421	0.68783	0.624241	0.549892	0.736369	0.646778	0.697021	0.798353	0.689692	0.530503	0.128812	0.162992	0.676465	0.594424	0.126562	0.646432	0.649669	0.330164	0.296442	0.620596	0.326723	0.652145	0.71441	0.168737	0.801034	0.641643	0.595062	0.253909	0.152488	0.545268	0.475097	0.584573	0.156463	0.130998	0.136865	0.715903	0.138079	0.76335	0.17443	0.179677	0.723146	0.15415	0.161242
07ce9ef7-e8b2-4c00-862c-29f87db47d83	5d11db29-925c-4cd5-a231-300507c63116	590	28	28	2025-08-24T04:22:12.000429Z	0.183897	1.32228	1.27348	1.27856	0.982152	1.47438	1.25753	1.31222	1.64438	1.38273	0.877017	0.150141	0.266431	1.34547	1.24737	0.199652	1.42583	1.37509	0.634898	0.59362	1.28558	0.557717	1.40055	1.5154	0.22613	1.64132	1.24025	1.10081	0.38781	0.204551	0.958556	1.01325	1.08779	0.20797	0.158907	0.194888	1.49878	0.176102	1.59217	0.254118	0.262051	1.40958	0.233741	0.23594
b77f02b4-5d57-4d9c-b892-d42b6c7174dd	5d11db29-925c-4cd5-a231-300507c63116	740	28	28	2025-08-24T04:22:28.000429Z	0.146718	0.671301	0.692585	0.624566	0.548434	0.736182	0.646733	0.700103	0.797943	0.69413	0.533097	0.128827	0.161873	0.68417	0.595215	0.126308	0.644033	0.646976	0.330069	0.301719	0.620477	0.326859	0.649853	0.709888	0.168605	0.801169	0.64199	0.598789	0.253354	0.15226	0.54533	0.474608	0.585298	0.156398	0.130916	0.137234	0.714925	0.138048	0.760326	0.17442	0.179693	0.722199	0.154183	0.161169
8c444fb9-cbbc-41a8-8af3-604421118fd0	5d11db29-925c-4cd5-a231-300507c63116	590	28	28	2025-08-24T04:42:14.000429Z	0.188027	1.31132	1.28645	1.27811	0.980879	1.4763	1.25763	1.31991	1.64644	1.38677	0.886736	0.149598	0.265636	1.35769	1.25044	0.199306	1.42591	1.38102	0.631767	0.592154	1.28442	0.558192	1.40562	1.51511	0.226876	1.64677	1.24445	1.10615	0.38803	0.204503	0.961911	1.01381	1.09007	0.207892	0.159049	0.191707	1.49946	0.176336	1.59084	0.25443	0.262362	1.41038	0.233248	0.23563
e66da5e4-6219-45db-886e-b611e4f10060	5d11db29-925c-4cd5-a231-300507c63116	740	28	28	2025-08-24T04:42:30.000429Z	0.148519	0.664928	0.696167	0.624609	0.547695	0.735541	0.64637	0.702003	0.797195	0.693472	0.536819	0.128936	0.161578	0.689385	0.596165	0.126158	0.642492	0.647219	0.329688	0.304098	0.619357	0.32677	0.653001	0.711843	0.169012	0.803454	0.643229	0.600554	0.253213	0.152303	0.549969	0.474385	0.586024	0.156061	0.13105	0.136919	0.715018	0.138035	0.757682	0.174643	0.179972	0.72094	0.153	0.161115
4668b6a5-6fc0-48bb-a149-2ca2c5c5958f	5d11db29-925c-4cd5-a231-300507c63116	590	28	28	2025-08-24T05:02:13.000429Z	0.192832	1.29476	1.29842	1.27751	0.980276	1.48215	1.25851	1.3302	1.64551	1.40874	0.899615	0.149788	0.266056	1.37186	1.2548	0.198526	1.42685	1.38922	0.631712	0.599745	1.28627	0.559347	1.40399	1.51428	0.228227	1.65258	1.23754	1.11062	0.388224	0.204959	0.967372	1.01489	1.09295	0.20764	0.159165	0.194828	1.49898	0.176517	1.58865	0.25475	0.263334	1.41192	0.231064	0.235959
fbcac55f-1d15-483c-956e-d553d71f1b7b	5d11db29-925c-4cd5-a231-300507c63116	740	28	28	2025-08-24T05:02:30.000429Z	0.15096	0.659666	0.700967	0.624876	0.546686	0.736511	0.646213	0.704916	0.794629	0.700126	0.541587	0.128768	0.163332	0.694117	0.59722	0.126315	0.64142	0.64943	0.329081	0.304009	0.61807	0.327132	0.652641	0.708414	0.169481	0.805125	0.638767	0.603427	0.253339	0.152311	0.550902	0.474399	0.587016	0.155835	0.131149	0.13669	0.71453	0.138075	0.755637	0.174899	0.18039	0.721092	0.150992	0.1612
a970dbe9-5791-4106-b528-46b4de209c2d	5d11db29-925c-4cd5-a231-300507c63116	590	28	28	2025-08-24T05:22:13.000429Z	0.196471	1.2881	1.30747	1.27578	0.980212	1.48703	1.25856	1.33459	1.64878	1.41037	0.909735	0.149926	0.266644	1.38549	1.25747	0.198088	1.42563	1.38951	0.631678	0.599629	1.28486	0.559544	1.40968	1.51365	0.228219	1.65409	1.24171	1.11592	0.388416	0.204847	0.969778	1.0149	1.09522	0.208725	0.159086	0.19573	1.49838	0.176735	1.58787	0.254777	0.264201	1.41236	0.235842	0.236183
c05c7fb3-0a64-425b-a6cd-e23afb279db0	5d11db29-925c-4cd5-a231-300507c63116	740	28	28	2025-08-24T05:22:29.000429Z	0.153494	0.655447	0.7046	0.624778	0.5456	0.737198	0.645648	0.708005	0.794625	0.699383	0.545492	0.129307	0.161088	0.701408	0.598522	0.125753	0.640339	0.648792	0.329658	0.305648	0.616396	0.326704	0.654765	0.709841	0.169742	0.804806	0.640517	0.606627	0.253359	0.152445	0.553174	0.474263	0.587651	0.156226	0.131326	0.137257	0.713181	0.138348	0.75329	0.174784	0.180983	0.719658	0.152746	0.161216
a0eab484-3d71-4997-9353-28aac71c7c92	5d11db29-925c-4cd5-a231-300507c63116	590	28	28	2025-08-24T05:42:14.000429Z	0.20026	1.28662	1.31925	1.27696	0.978453	1.49156	1.25778	1.33682	1.64359	1.40536	0.917506	0.149527	0.264832	1.38962	1.26199	0.197963	1.42713	1.38827	0.629778	0.593624	1.28475	0.559861	1.41757	1.51535	0.228057	1.65693	1.24647	1.11541	0.389391	0.204816	0.976193	1.01591	1.09765	0.20809	0.159576	0.193593	1.50132	0.17637	1.58865	0.254754	0.264748	1.41108	0.24202	0.236142
c62835c4-96fe-4193-8210-5beb02ebeef9	5d11db29-925c-4cd5-a231-300507c63116	740	28	28	2025-08-24T05:42:30.000429Z	0.156157	0.65419	0.708924	0.624324	0.543692	0.737525	0.64556	0.710566	0.791472	0.702383	0.549225	0.129221	0.159828	0.703098	0.599783	0.125892	0.638954	0.646177	0.329269	0.303061	0.61418	0.327044	0.654494	0.705758	0.169758	0.805679	0.642984	0.606134	0.253956	0.152458	0.554384	0.474322	0.588789	0.15605	0.131561	0.138272	0.711556	0.138261	0.752598	0.174965	0.18136	0.719031	0.154744	0.161454
ad82e932-d44d-4fdb-9296-49c500533975	5d11db29-925c-4cd5-a231-300507c63116	590	28	28	2025-08-24T06:02:14.000429Z	0.205604	1.28286	1.33021	1.27473	0.97754	1.49617	1.25777	1.34278	1.64863	1.38285	0.926929	0.149765	0.264796	1.40016	1.26507	0.19775	1.42992	1.38368	0.633633	0.593072	1.27981	0.55984	1.42188	1.51613	0.229325	1.65874	1.2518	1.12202	0.390755	0.2053	0.980723	1.01686	1.10082	0.208013	0.159931	0.194724	1.49773	0.176617	1.58893	0.255231	0.265545	1.41107	0.245205	0.236567
47a569db-9b34-4391-95c1-a3153c903987	5d11db29-925c-4cd5-a231-300507c63116	740	28	28	2025-08-24T06:02:30.000429Z	0.158567	0.651831	0.712756	0.62407	0.543158	0.73625	0.645229	0.71235	0.791911	0.69185	0.552922	0.129278	0.16202	0.705404	0.600763	0.125915	0.638954	0.642935	0.330004	0.303363	0.612589	0.326983	0.655717	0.705416	0.170778	0.8053	0.643569	0.608316	0.254506	0.15255	0.55647	0.47429	0.589492	0.156014	0.131784	0.138596	0.711193	0.138286	0.751234	0.175053	0.181606	0.717877	0.156332	0.161517
b238a963-5cf7-468a-9a9b-a642637f7e07	5d11db29-925c-4cd5-a231-300507c63116	590	28	28	2025-08-24T06:22:12.000429Z	0.209548	1.27718	1.34141	1.27361	0.977109	1.50232	1.2573	1.34514	1.64736	1.37838	0.937708	0.149735	0.264647	1.41545	1.26767	0.197532	1.42837	1.38456	0.632622	0.606274	1.27987	0.559628	1.4216	1.51564	0.230564	1.65591	1.24931	1.13496	0.391811	0.205212	0.983791	1.01698	1.10327	0.207809	0.160143	0.194619	1.49499	0.176712	1.5888	0.255256	0.265879	1.41167	0.24272	0.236539
0c5351e2-e7aa-4036-adee-b8998ff5245f	5d11db29-925c-4cd5-a231-300507c63116	740	28	28	2025-08-24T06:22:28.000429Z	0.160999	0.650545	0.715906	0.623597	0.541839	0.737945	0.644787	0.71608	0.791162	0.69212	0.556655	0.129537	0.159457	0.712216	0.601774	0.12576	0.638375	0.643279	0.3292	0.308288	0.611106	0.326993	0.653945	0.70368	0.170947	0.80515	0.641587	0.610109	0.254777	0.152546	0.556523	0.47361	0.590072	0.156108	0.131891	0.138122	0.708318	0.138382	0.749341	0.175018	0.181693	0.716774	0.15705	0.16127
d6bb9945-bcac-47f9-b4ac-3339f29c5b03	5d11db29-925c-4cd5-a231-300507c63116	590	28	28	2025-08-24T06:42:14.000429Z	0.211503	1.27593	1.35123	1.27342	0.974999	1.5093	1.25486	1.35982	1.64962	1.36397	0.947453	0.149398	0.263989	1.42643	1.27273	0.197761	1.43161	1.38285	0.633245	0.609203	1.27846	0.561239	1.43216	1.51887	0.23132	1.65254	1.24468	1.14413	0.393057	0.205059	0.988875	1.0181	1.10664	0.208092	0.159541	0.198368	1.49925	0.176764	1.58995	0.255354	0.266343	1.4138	0.24012	0.236255
03debbab-993c-43b5-9ecf-2d4f5e7ca0f6	5d11db29-925c-4cd5-a231-300507c63116	740	28	28	2025-08-24T06:42:30.000429Z	0.162089	0.651472	0.720538	0.623116	0.540368	0.738335	0.644243	0.718559	0.789376	0.685587	0.559495	0.12963	0.158583	0.717851	0.603112	0.125781	0.636639	0.6412	0.328718	0.310147	0.609502	0.328136	0.655982	0.703588	0.170494	0.801841	0.639249	0.615702	0.255566	0.152642	0.560256	0.473979	0.59085	0.155732	0.132036	0.138817	0.709762	0.138195	0.749065	0.175214	0.18189	0.716882	0.155474	0.161364
d99af0c7-496e-4834-a761-1b71eadca2fa	5d11db29-925c-4cd5-a231-300507c63116	590	28	28	2025-08-24T07:02:13.000429Z	0.214209	1.27169	1.36396	1.27088	0.974572	1.51139	1.25408	1.36335	1.64909	1.36364	0.956542	0.149706	0.263666	1.42759	1.27399	0.197766	1.43334	1.38121	0.628695	0.614415	1.27872	0.562585	1.43849	1.51872	0.231321	1.65123	1.24694	1.16115	0.393618	0.205617	0.99684	1.01908	1.10967	0.20801	0.160098	0.197173	1.50025	0.177011	1.58993	0.255988	0.267128	1.41453	0.23569	0.236575
15d7d7a3-48b9-44a1-9475-76a9bb04d19d	5d11db29-925c-4cd5-a231-300507c63116	740	28	28	2025-08-24T07:02:29.000429Z	0.163633	0.648702	0.724664	0.622648	0.539484	0.736842	0.643732	0.720274	0.78827	0.68897	0.562691	0.129714	0.158629	0.717272	0.603942	0.125577	0.635806	0.63951	0.326472	0.312727	0.609957	0.328171	0.658437	0.702486	0.17154	0.801757	0.640276	0.616674	0.255226	0.152764	0.561601	0.473734	0.591467	0.155522	0.131948	0.138812	0.708261	0.138307	0.74779	0.175286	0.182283	0.715904	0.1526	0.161334
fff6431f-1bc8-4787-b645-d1b54db38f89	5d11db29-925c-4cd5-a231-300507c63116	590	28	28	2025-08-24T07:22:13.000429Z	0.216669	1.26697	1.37385	1.26954	0.973848	1.51248	1.25264	1.36806	1.6457	1.35463	0.965919	0.149803	0.263515	1.43163	1.27605	0.197094	1.43713	1.37986	0.631566	0.616185	1.28039	0.563119	1.43872	1.52008	0.231621	1.6513	1.25136	1.16347	0.393057	0.205779	1.00245	1.01967	1.11295	0.207825	0.160448	0.197079	1.50103	0.176977	1.58855	0.256176	0.267853	1.41545	0.233671	0.236636
5e8e52c2-b7b1-451f-b4e5-dc5a05654d4d	5d11db29-925c-4cd5-a231-300507c63116	740	28	28	2025-08-24T07:22:29.000429Z	0.16493	0.647679	0.728844	0.622128	0.538602	0.736592	0.642555	0.722074	0.785328	0.683791	0.565905	0.129819	0.158289	0.718739	0.605043	0.125353	0.637151	0.639076	0.328885	0.317233	0.60968	0.328279	0.657745	0.701308	0.172056	0.799316	0.642594	0.622323	0.254886	0.152829	0.562777	0.473687	0.592274	0.155817	0.132248	0.138984	0.707111	0.138364	0.745401	0.175361	0.182649	0.715231	0.153387	0.161292
23873a28-3aba-4041-bf84-457f60521782	5d11db29-925c-4cd5-a231-300507c63116	590	28	28	2025-08-24T07:42:15.000429Z	0.218265	1.24596	1.38254	1.26842	0.972081	1.50816	1.24991	1.37671	1.64898	1.35336	0.975803	0.14962	0.263637	1.43226	1.28118	0.196896	1.44006	1.38033	0.635755	0.615186	1.28147	0.562947	1.44158	1.52209	0.230116	1.65049	1.25352	1.17763	0.393677	0.205796	1.00449	1.02029	1.11619	0.208158	0.159897	0.19985	1.50211	0.177033	1.58918	0.256144	0.268356	1.41594	0.236148	0.23654
dae327c0-0d7b-421c-8385-85d0b27e15bc	5d11db29-925c-4cd5-a231-300507c63116	740	28	28	2025-08-24T07:42:31.000429Z	0.16585	0.642016	0.731618	0.621418	0.537413	0.733483	0.642181	0.726107	0.785868	0.686089	0.569384	0.130041	0.158147	0.720374	0.606325	0.125406	0.636177	0.637166	0.329927	0.311906	0.608657	0.328172	0.657511	0.701088	0.172385	0.797512	0.641287	0.62424	0.255469	0.15303	0.565648	0.473493	0.593024	0.155542	0.132689	0.139466	0.706665	0.138481	0.744247	0.175411	0.183302	0.714347	0.154066	0.161457
20403f9b-2a87-4f9c-81ea-a88adb51b94a	5d11db29-925c-4cd5-a231-300507c63116	590	28	28	2025-08-24T08:02:14.000429Z	0.219128	1.23926	1.39261	1.26711	0.971323	1.5063	1.24856	1.38252	1.65224	1.3378	0.985294	0.149946	0.264202	1.43274	1.2809	0.196614	1.43754	1.38077	0.637437	0.617898	1.28126	0.563702	1.44398	1.52396	0.231179	1.65044	1.24874	1.17277	0.395397	0.206468	1.01136	1.02142	1.12005	0.208916	0.160507	0.199094	1.50551	0.177301	1.5882	0.25651	0.269156	1.41721	0.239802	0.237101
a469c0a5-2c30-4050-901f-7fac936198d3	5d11db29-925c-4cd5-a231-300507c63116	740	28	28	2025-08-24T08:02:30.000429Z	0.166593	0.633675	0.734262	0.621041	0.536625	0.732148	0.641136	0.729719	0.786213	0.671609	0.571852	0.130054	0.158231	0.720253	0.607071	0.12574	0.634939	0.63725	0.330027	0.315345	0.606942	0.328268	0.656271	0.700073	0.173189	0.795976	0.639335	0.626373	0.256194	0.153224	0.570057	0.473486	0.59383	0.155978	0.132485	0.139462	0.707305	0.138446	0.742263	0.175397	0.183605	0.713362	0.157059	0.161508
631b20c2-d53d-48f1-b567-212b4a02bea1	5d11db29-925c-4cd5-a231-300507c63116	590	28	28	2025-08-24T08:22:13.000429Z	0.219878	1.22965	1.40248	1.26322	0.97152	1.51115	1.24687	1.3829	1.64771	1.34514	0.996329	0.149731	0.263105	1.44277	1.28376	0.196463	1.43565	1.39075	0.638297	0.620744	1.28166	0.563246	1.44739	1.52345	0.23376	1.65375	1.24679	1.18181	0.39576	0.206449	1.01705	1.02134	1.12287	0.208361	0.160565	0.199695	1.50551	0.177345	1.58783	0.256411	0.269513	1.41735	0.238864	0.236736
519031a7-7a09-4ef0-ac61-190f04feeb1e	5d11db29-925c-4cd5-a231-300507c63116	740	28	28	2025-08-24T08:22:29.000429Z	0.166741	0.630989	0.73728	0.620537	0.535717	0.732373	0.640386	0.731135	0.78349	0.682558	0.575091	0.130048	0.15772	0.723003	0.608615	0.125416	0.633351	0.639385	0.329941	0.319893	0.607153	0.327916	0.656931	0.699536	0.173539	0.79387	0.637609	0.626833	0.256289	0.153257	0.569664	0.472989	0.594367	0.155853	0.132628	0.139756	0.706383	0.138471	0.740875	0.175446	0.183809	0.712835	0.157102	0.161289
686eef76-dc87-4c69-87f7-c7ee364f3fbb	5d11db29-925c-4cd5-a231-300507c63116	590	28	28	2025-08-24T08:42:12.000429Z	0.220668	1.23132	1.41375	1.25941	0.969888	1.51076	1.24494	1.39164	1.64982	1.33803	1.00986	0.149538	0.263	1.44558	1.2892	0.19603	1.42966	1.39269	0.64165	0.620807	1.28541	0.563672	1.44688	1.52389	0.235275	1.65432	1.25026	1.189	0.396519	0.206499	1.02653	1.02238	1.12591	0.20758	0.160993	0.199738	1.50723	0.17715	1.58729	0.256472	0.269969	1.41716	0.243277	0.236766
c9cd2811-c78b-479c-b3b3-4e08a0b9fdbe	5d11db29-925c-4cd5-a231-300507c63116	740	28	28	2025-08-24T08:42:28.000429Z	0.1667	0.627913	0.74098	0.619977	0.534496	0.731486	0.639615	0.734535	0.78368	0.67531	0.581007	0.130195	0.157936	0.724233	0.609725	0.125397	0.630585	0.638595	0.331624	0.320824	0.606289	0.32837	0.655918	0.698688	0.174135	0.792027	0.639316	0.630315	0.256842	0.153253	0.574281	0.473125	0.594791	0.155704	0.132798	0.139644	0.705823	0.138416	0.739156	0.175346	0.183994	0.712084	0.157037	0.161257
9a3e9754-b883-4726-93a4-8bb4fe095c8a	5d11db29-925c-4cd5-a231-300507c63116	590	28	28	2025-08-24T09:02:14.000429Z	0.220847	1.23222	1.42218	1.26028	0.968695	1.50916	1.2424	1.40058	1.65033	1.31534	1.02054	0.150039	0.264356	1.44989	1.28976	0.196519	1.4312	1.39104	0.643513	0.626125	1.28357	0.565484	1.4536	1.52627	0.233053	1.65256	1.25223	1.19957	0.397882	0.206908	1.03126	1.02298	1.129	0.20868	0.160791	0.201504	1.50778	0.177424	1.5869	0.256964	0.270918	1.4185	0.243017	0.236723
7a778c15-d5b8-43d3-93d0-54ea0d8edaaf	5d11db29-925c-4cd5-a231-300507c63116	740	28	28	2025-08-24T09:02:30.000429Z	0.166942	0.632007	0.745148	0.618593	0.533069	0.728333	0.638777	0.735913	0.780448	0.666946	0.585466	0.130329	0.157279	0.727093	0.610479	0.125484	0.629246	0.635803	0.331107	0.317511	0.606245	0.329184	0.657784	0.698707	0.17388	0.788524	0.640287	0.631235	0.257582	0.153276	0.574984	0.473028	0.595353	0.155452	0.133039	0.140514	0.706373	0.138479	0.737534	0.175528	0.184314	0.711833	0.158403	0.161166
b295d40c-00d3-4c98-9e11-2f455a79a465	5d11db29-925c-4cd5-a231-300507c63116	590	28	28	2025-08-24T09:22:13.000429Z	0.222016	1.20369	1.43324	1.25626	0.968908	1.5092	1.24071	1.40292	1.65186	1.3149	1.02626	0.150219	0.263419	1.45777	1.29333	0.196308	1.43053	1.3921	0.644218	0.622219	1.28527	0.566612	1.45124	1.52564	0.237529	1.64823	1.25411	1.20665	0.399027	0.207192	1.03995	1.02375	1.13184	0.208142	0.161838	0.200541	1.50834	0.177463	1.58613	0.257207	0.271485	1.41766	0.243919	0.237145
7daa69bb-928b-409d-99d8-c50458ae773b	5d11db29-925c-4cd5-a231-300507c63116	740	28	28	2025-08-24T09:22:29.000429Z	0.167219	0.621528	0.748804	0.61806	0.532464	0.725685	0.637266	0.737511	0.781236	0.668111	0.587484	0.130405	0.157362	0.729363	0.611324	0.125485	0.629279	0.636802	0.332774	0.323137	0.604828	0.32941	0.658556	0.697933	0.174318	0.788034	0.640546	0.635209	0.258392	0.153337	0.577422	0.472872	0.595656	0.15537	0.133101	0.14061	0.705019	0.138566	0.736589	0.175597	0.184634	0.711123	0.157427	0.161298
bceab128-d5b5-4170-b95e-c6af9a2e7746	5d11db29-925c-4cd5-a231-300507c63116	590	28	28	2025-08-24T09:42:12.000429Z	0.221895	1.21334	1.44211	1.25395	0.96796	1.51071	1.23796	1.40603	1.65369	1.29892	1.04729	0.150191	0.263166	1.46169	1.29643	0.196017	1.4363	1.38987	0.645755	0.627079	1.28369	0.5668	1.45448	1.52747	0.236892	1.6483	1.25208	1.20922	0.397447	0.206998	1.04569	1.02344	1.13439	0.207821	0.161062	0.203792	1.51193	0.177204	1.58401	0.257223	0.271713	1.41771	0.244244	0.236889
16312680-a156-4108-b213-a154b3953cee	5d11db29-925c-4cd5-a231-300507c63116	740	28	28	2025-08-24T09:42:28.000429Z	0.167073	0.621556	0.750241	0.617147	0.531874	0.727242	0.63642	0.741996	0.781651	0.659569	0.59317	0.1305	0.157234	0.730806	0.612605	0.125606	0.630099	0.635129	0.332415	0.324691	0.602636	0.329487	0.659285	0.697284	0.174915	0.783683	0.63853	0.636939	0.257388	0.153343	0.582245	0.472625	0.595813	0.155745	0.133581	0.140638	0.704825	0.138397	0.733935	0.175713	0.184915	0.710023	0.157258	0.161198
3a8a6792-ed14-4073-b787-09819a42d648	5d11db29-925c-4cd5-a231-300507c63116	590	28	28	2025-08-24T10:02:14.000429Z	0.222357	1.19895	1.44718	1.25193	0.967168	1.52098	1.23584	1.41009	1.6567	1.29786	1.05242	0.150198	0.263322	1.46475	1.29897	0.196202	1.43986	1.38509	0.646508	0.639521	1.28312	0.567506	1.46616	1.53168	0.239499	1.65066	1.25177	1.21997	0.3956	0.207391	1.052	1.02439	1.13738	0.207979	0.161742	0.204711	1.50978	0.177611	1.5837	0.25754	0.272186	1.41955	0.250716	0.237286
b5da432c-73c3-4374-8e8a-924d1342419d	5d11db29-925c-4cd5-a231-300507c63116	740	28	28	2025-08-24T10:02:30.000429Z	0.167355	0.613734	0.755014	0.616586	0.530511	0.729734	0.635123	0.74243	0.781187	0.656328	0.595816	0.130445	0.157034	0.732689	0.613164	0.125667	0.631002	0.634469	0.332678	0.326365	0.601976	0.32922	0.660641	0.696695	0.175527	0.782353	0.638159	0.639598	0.25629	0.153424	0.58223	0.472562	0.595987	0.155779	0.133822	0.140981	0.704358	0.13846	0.733116	0.175803	0.18505	0.709869	0.159874	0.161309
69416654-f068-4a86-b776-bd1db99ce58d	5d11db29-925c-4cd5-a231-300507c63116	590	28	28	2025-08-24T10:22:13.000429Z	0.222021	1.2137	1.45775	1.25252	0.965981	1.51531	1.23283	1.41587	1.65301	1.28014	1.06537	0.150382	0.263235	1.4704	1.29795	0.196267	1.43997	1.3891	0.643427	0.636939	1.2839	0.567143	1.46614	1.53092	0.239537	1.64379	1.25309	1.23541	0.398021	0.207471	1.05692	1.02452	1.13952	0.208515	0.162411	0.202484	1.50711	0.177469	1.58221	0.257683	0.272422	1.41961	0.252568	0.237176
3883a8a7-71af-4c45-ba44-755404c5b712	5d11db29-925c-4cd5-a231-300507c63116	740	28	28	2025-08-24T10:22:29.000429Z	0.167381	0.618016	0.757405	0.616273	0.530409	0.728856	0.634681	0.743696	0.778399	0.649139	0.601878	0.130738	0.156538	0.735258	0.613622	0.125791	0.628454	0.632841	0.33169	0.323753	0.600892	0.329407	0.663723	0.697091	0.17561	0.781307	0.6393	0.641873	0.257672	0.153572	0.585576	0.472274	0.596118	0.155578	0.134163	0.14163	0.70469	0.138535	0.730898	0.175944	0.185124	0.709645	0.159973	0.161352
88411e70-a4fb-487b-ad86-3a74d4a895d8	5d11db29-925c-4cd5-a231-300507c63116	590	28	28	2025-08-24T10:42:14.000429Z	0.221646	1.20094	1.46542	1.25106	0.965311	1.51023	1.23095	1.42505	1.65497	1.27682	1.07353	0.150328	0.262735	1.4762	1.29838	0.19633	1.43655	1.38543	0.642611	0.63563	1.28486	0.565484	1.46934	1.53124	0.23951	1.64657	1.25586	1.25098	0.39897	0.207078	1.06263	1.02455	1.1412	0.207915	0.161872	0.20177	1.50881	0.177185	1.58007	0.257321	0.272533	1.41998	0.247172	0.237051
f8709669-18a1-4e53-9c95-39d73e246da3	5d11db29-925c-4cd5-a231-300507c63116	740	28	28	2025-08-24T10:42:30.000429Z	0.16721	0.611747	0.760135	0.615378	0.529423	0.729154	0.633525	0.748269	0.778167	0.647023	0.604726	0.131001	0.156349	0.736919	0.614346	0.126132	0.626671	0.630483	0.331845	0.323956	0.600873	0.328324	0.665128	0.696922	0.17522	0.779263	0.639326	0.646532	0.258582	0.153552	0.588091	0.47207	0.596242	0.155324	0.134231	0.140467	0.704254	0.138374	0.728747	0.175987	0.185449	0.709043	0.159171	0.161383
6f3d7e98-faf5-40f1-bf49-3ba2293b92e0	5d11db29-925c-4cd5-a231-300507c63116	590	28	28	2025-08-24T11:02:14.000429Z	0.221187	1.20145	1.47623	1.24657	0.964535	1.51087	1.22873	1.42754	1.65632	1.27627	1.08008	0.150903	0.262769	1.48095	1.30425	0.196207	1.4317	1.38781	0.645503	0.646712	1.2887	0.565885	1.47758	1.5354	0.240391	1.64947	1.25615	1.27677	0.401754	0.20755	1.07289	1.02611	1.14415	0.207391	0.162056	0.205994	1.51321	0.177597	1.58045	0.257485	0.273104	1.42189	0.249028	0.237723
bddd62ab-c058-40db-ac64-235d77d52964	5d11db29-925c-4cd5-a231-300507c63116	740	28	28	2025-08-24T11:02:30.000429Z	0.167081	0.610642	0.762327	0.614622	0.528148	0.729151	0.632201	0.749956	0.777994	0.641556	0.605071	0.131122	0.158386	0.73796	0.615041	0.126172	0.624678	0.63096	0.332846	0.327631	0.601082	0.328589	0.66641	0.696651	0.17555	0.777584	0.638928	0.652375	0.259879	0.153609	0.591605	0.47194	0.596115	0.155369	0.134182	0.141085	0.703073	0.13862	0.727626	0.175883	0.185735	0.708913	0.158059	0.16149
da41226a-2c89-4229-beea-f38e0bc22f4d	5d11db29-925c-4cd5-a231-300507c63116	590	28	28	2025-08-24T11:22:13.000429Z	0.220942	1.2059	1.48152	1.24913	0.963734	1.50829	1.22582	1.43426	1.6619	1.25722	1.0842	0.151225	0.26398	1.48551	1.30066	0.196319	1.42997	1.39726	0.645274	0.652307	1.28684	0.566985	1.47616	1.53467	0.242265	1.65136	1.25575	1.29657	0.40538	0.207165	1.07825	1.02621	1.14659	0.207934	0.162105	0.205302	1.50757	0.177752	1.57888	0.257684	0.273216	1.42207	0.247523	0.237416
beafbf15-5f79-48ec-8366-4efe7b47766c	5d11db29-925c-4cd5-a231-300507c63116	740	28	28	2025-08-24T11:22:29.000429Z	0.166452	0.613844	0.76602	0.614087	0.526776	0.73122	0.631253	0.751215	0.778614	0.635449	0.604886	0.131365	0.155937	0.741482	0.615536	0.126122	0.624139	0.632909	0.331373	0.330395	0.601445	0.328961	0.665193	0.695779	0.177125	0.777576	0.637855	0.658948	0.261005	0.153356	0.592654	0.471709	0.595918	0.155036	0.134312	0.141769	0.701453	0.138592	0.725955	0.175744	0.185621	0.70807	0.157737	0.161291
3dca1f34-4311-435a-a038-9d9c210ee1e0	5d11db29-925c-4cd5-a231-300507c63116	590	28	28	2025-08-24T11:42:14.000429Z	0.220126	1.19999	1.49148	1.24378	0.962266	1.47051	1.22285	1.43565	1.65862	1.25762	1.09273	0.150946	0.263331	1.49113	1.30417	0.196179	1.43636	1.398	0.641171	0.646862	1.28482	0.568802	1.47578	1.53467	0.241783	1.64805	1.25941	1.31314	0.406827	0.207158	1.08867	1.02744	1.14962	0.207783	0.162646	0.203584	1.50798	0.177567	1.57818	0.257675	0.273523	1.42219	0.240191	0.2375
43ae8979-8c80-40e3-a1ed-2f9c107dd021	5d11db29-925c-4cd5-a231-300507c63116	740	28	28	2025-08-24T11:42:30.000429Z	0.166261	0.607616	0.768832	0.612672	0.525745	0.716349	0.629839	0.7536	0.776592	0.634656	0.606462	0.131496	0.155785	0.742879	0.616369	0.126124	0.624176	0.633281	0.32984	0.331148	0.599712	0.329821	0.665501	0.695403	0.177685	0.77696	0.639257	0.664903	0.261389	0.153353	0.595392	0.471713	0.596097	0.155226	0.13393	0.142191	0.700865	0.138595	0.724673	0.175873	0.185931	0.707614	0.15532	0.161502
6ee1fb5f-69a0-40f2-9523-f0bf12c4f3d7	5d11db29-925c-4cd5-a231-300507c63116	590	28	28	2025-08-24T12:02:14.000429Z	0.22011	1.19478	1.49823	1.24607	0.961218	1.45907	1.22159	1.44193	1.6633	1.26463	1.10378	0.1518	0.264152	1.49692	1.30316	0.196723	1.44063	1.39668	0.639144	0.654191	1.28495	0.568914	1.48153	1.5366	0.243152	1.6538	1.25866	1.32346	0.405935	0.207528	1.0913	1.0275	1.15235	0.207344	0.162505	0.206718	1.50546	0.177954	1.57742	0.25804	0.274118	1.42325	0.237017	0.237679
f178cfa9-8957-4295-81ee-d7963eb631a3	5d11db29-925c-4cd5-a231-300507c63116	740	28	28	2025-08-24T12:02:30.000429Z	0.166204	0.607742	0.771975	0.61273	0.525247	0.713865	0.628691	0.754358	0.777443	0.634512	0.608874	0.13199	0.155837	0.743548	0.616786	0.126238	0.624805	0.632436	0.328968	0.329658	0.597962	0.329511	0.665214	0.694585	0.177969	0.777878	0.638617	0.669092	0.260934	0.153288	0.597337	0.471472	0.59602	0.15512	0.134113	0.141728	0.700484	0.138589	0.723093	0.175888	0.186107	0.706971	0.154733	0.161382
06d7fdeb-e67b-45de-8564-4a449d6fa6a3	5d11db29-925c-4cd5-a231-300507c63116	590	28	28	2025-08-24T12:22:13.000429Z	0.219891	1.1812	1.5066	1.23959	0.961648	1.45111	1.21782	1.44992	1.65867	1.25629	1.11076	0.152035	0.263981	1.50382	1.30258	0.196355	1.44049	1.39154	0.641157	0.660582	1.28459	0.570129	1.48735	1.53835	0.242441	1.65767	1.26205	1.33536	0.404893	0.207611	1.09889	1.02848	1.15512	0.207956	0.162688	0.209078	1.50354	0.178025	1.57684	0.258275	0.274434	1.42414	0.239915	0.238038
ab9a03ad-8233-42ea-9029-2bdd70bd11a8	5d11db29-925c-4cd5-a231-300507c63116	740	28	28	2025-08-24T12:22:29.000429Z	0.16637	0.598429	0.774963	0.611891	0.524303	0.707642	0.626795	0.757018	0.773946	0.632674	0.610187	0.132095	0.155842	0.748097	0.616753	0.126277	0.625117	0.62904	0.329709	0.33816	0.596432	0.329952	0.665357	0.694204	0.178214	0.777314	0.639085	0.672928	0.26029	0.153274	0.600068	0.47148	0.596835	0.155762	0.134235	0.142517	0.699853	0.13867	0.721365	0.175863	0.186222	0.706497	0.154117	0.161422
aa3cf809-fac5-48f2-bd3b-38f3f791bd4b	5d11db29-925c-4cd5-a231-300507c63116	590	28	28	2025-08-24T12:42:12.000429Z	0.219107	1.18475	1.51571	1.24052	0.960113	1.44654	1.21604	1.45103	1.6619	1.24229	1.1087	0.151964	0.263337	1.50382	1.30502	0.196607	1.44039	1.39104	0.641765	0.65938	1.28262	0.57028	1.48337	1.5359	0.243484	1.65469	1.26276	1.34218	0.404088	0.207435	1.10349	1.0291	1.15845	0.207799	0.163168	0.204858	1.50334	0.177682	1.57654	0.258114	0.274625	1.42363	0.236524	0.237822
ef489191-179c-4ce4-9aa2-7e4d9e85bed0	5d11db29-925c-4cd5-a231-300507c63116	740	28	28	2025-08-24T12:42:29.000429Z	0.166117	0.596983	0.775418	0.611164	0.523825	0.707474	0.625893	0.761977	0.775763	0.628706	0.606119	0.132363	0.155906	0.749425	0.617366	0.12665	0.624176	0.628811	0.329393	0.340044	0.59566	0.329907	0.665794	0.693732	0.178605	0.776221	0.639711	0.675908	0.260059	0.153519	0.601535	0.471485	0.598687	0.155482	0.134596	0.142432	0.698965	0.138665	0.720286	0.175977	0.186553	0.705853	0.154099	0.161494
25585396-8b84-407e-9dd1-ec6d2140427b	5d11db29-925c-4cd5-a231-300507c63116	590	28	28	2025-08-24T13:02:13.000429Z	0.219133	1.18415	1.52365	1.24074	0.959673	1.45097	1.21361	1.45945	1.66772	1.24732	1.08393	0.152803	0.264482	1.49689	1.3035	0.197064	1.43817	1.39174	0.640876	0.663306	1.2815	0.569589	1.4862	1.53747	0.239486	1.65859	1.2669	1.35854	0.406101	0.207908	1.11369	1.02899	1.16063	0.208226	0.163612	0.207672	1.5008	0.177989	1.57584	0.258411	0.27519	1.42449	0.239409	0.237671
6589e7e5-39b1-48eb-8f31-fe92ae289190	5d11db29-925c-4cd5-a231-300507c63116	740	28	28	2025-08-24T13:02:30.000429Z	0.165784	0.597694	0.779883	0.61105	0.522834	0.71198	0.625058	0.762564	0.775955	0.632421	0.593534	0.132936	0.155649	0.749086	0.616927	0.126936	0.620827	0.628349	0.328756	0.335578	0.594537	0.329	0.666413	0.693836	0.178401	0.77498	0.64076	0.678363	0.261197	0.153573	0.607424	0.470994	0.600102	0.154983	0.135394	0.142663	0.697103	0.138708	0.71865	0.1761	0.186734	0.705797	0.153976	0.161386
6f85b10b-70de-47e2-b6f1-8a99f1ef1634	5d11db29-925c-4cd5-a231-300507c63116	590	28	28	2025-08-24T13:22:12.000429Z	0.219166	1.18219	1.52982	1.2359	0.959335	1.43233	1.21213	1.46075	1.66497	1.25216	1.05652	0.153526	0.263685	1.50003	1.30934	0.196896	1.4342	1.39391	0.641923	0.672018	1.28405	0.569835	1.48986	1.54537	0.243624	1.65514	1.2724	1.36769	0.406696	0.208083	1.11724	1.03004	1.15961	0.207385	0.163328	0.208245	1.49982	0.178121	1.57641	0.258584	0.275777	1.42554	0.24073	0.237817
a4a3a215-dc54-47db-b32c-1194580e8045	5d11db29-925c-4cd5-a231-300507c63116	740	28	28	2025-08-24T13:22:28.000429Z	0.165404	0.595234	0.782052	0.611048	0.521862	0.707665	0.623762	0.766954	0.774405	0.630818	0.579975	0.133118	0.155626	0.748217	0.617423	0.126983	0.6199	0.628048	0.328797	0.337231	0.594583	0.328868	0.66655	0.693404	0.178683	0.772134	0.641921	0.683222	0.26167	0.153671	0.607239	0.471064	0.597053	0.154889	0.135406	0.142956	0.696774	0.138701	0.717695	0.176061	0.18712	0.705482	0.154912	0.161315
88a220fd-4af9-473a-8122-f61bf583199e	5d11db29-925c-4cd5-a231-300507c63116	590	28	28	2025-08-24T13:42:12.000429Z	0.218973	1.181	1.53707	1.23896	0.95663	1.41223	1.20884	1.46984	1.67074	1.23265	1.0593	0.153093	0.263767	1.50715	1.31037	0.196725	1.43655	1.39972	0.649542	0.674798	1.2832	0.569862	1.49223	1.53983	0.244082	1.65691	1.27073	1.37942	0.408949	0.207731	1.12421	1.03041	1.1629	0.208085	0.16311	0.209708	1.49598	0.178028	1.57533	0.258223	0.276099	1.42532	0.239441	0.237411
44e68eab-8846-4920-ab9a-ecb1c3476aec	5d11db29-925c-4cd5-a231-300507c63116	740	28	28	2025-08-24T13:42:30.000429Z	0.165026	0.594172	0.783756	0.61018	0.520711	0.69827	0.622724	0.769225	0.77583	0.624056	0.575194	0.133125	0.157609	0.749173	0.617865	0.127115	0.61949	0.628527	0.331718	0.339908	0.592419	0.329552	0.667814	0.693707	0.177645	0.771277	0.640585	0.685956	0.262807	0.153749	0.610864	0.470935	0.596184	0.155114	0.135239	0.143862	0.697153	0.138583	0.716057	0.175987	0.187327	0.705285	0.154314	0.161516
9bb1468e-a287-4135-9cb3-41f33962c7df	5d11db29-925c-4cd5-a231-300507c63116	590	28	28	2025-08-24T14:02:13.000429Z	0.219274	1.17894	1.5473	1.2368	0.957272	1.39442	1.20676	1.46583	1.66832	1.2295	1.07792	0.153947	0.264201	1.51646	1.30797	0.197313	1.43791	1.4045	0.650863	0.672865	1.28207	0.571186	1.48876	1.53795	0.243822	1.65452	1.26877	1.39014	0.411684	0.208017	1.12777	1.03148	1.16884	0.207953	0.163902	0.206814	1.49587	0.178283	1.57547	0.258468	0.276989	1.42566	0.238582	0.23777
5cd5463c-121b-4034-a721-f79c6d473958	5d11db29-925c-4cd5-a231-300507c63116	740	28	28	2025-08-24T14:02:29.000429Z	0.16491	0.591048	0.785752	0.610441	0.520608	0.690774	0.621675	0.769003	0.774134	0.618448	0.586911	0.13365	0.155926	0.751269	0.617857	0.127334	0.619181	0.628975	0.331803	0.342644	0.592034	0.329483	0.668432	0.693577	0.18045	0.770821	0.638965	0.690015	0.263759	0.153726	0.612343	0.470716	0.596895	0.155082	0.135202	0.142793	0.696091	0.138713	0.714665	0.175962	0.187593	0.704924	0.154742	0.161246
9b7b0eeb-477b-4742-b667-42302d1ad13c	5d11db29-925c-4cd5-a231-300507c63116	590	28	28	2025-08-24T14:22:12.000429Z	0.219578	1.17742	1.55675	1.23272	0.957435	1.39279	1.2046	1.47798	1.67037	1.23512	1.07403	0.154261	0.263863	1.52102	1.31296	0.197439	1.43798	1.39878	0.650556	0.679853	1.28408	0.571851	1.4953	1.54078	0.24621	1.65112	1.26768	1.39602	0.413345	0.208305	1.133	1.03141	1.16971	0.208552	0.163725	0.2106	1.48971	0.178399	1.57493	0.258572	0.277182	1.42716	0.242397	0.237873
1af3a44e-89ed-4169-b960-8cbc34f6223f	5d11db29-925c-4cd5-a231-300507c63116	740	28	28	2025-08-24T14:22:28.000429Z	0.164768	0.591872	0.789042	0.609307	0.51956	0.69035	0.620524	0.773404	0.774016	0.619726	0.58521	0.133601	0.155319	0.753734	0.619451	0.127444	0.618523	0.627645	0.330992	0.340904	0.592534	0.330176	0.667305	0.692238	0.180097	0.766884	0.638346	0.692631	0.264081	0.153709	0.612177	0.470372	0.59649	0.154949	0.135636	0.143901	0.693275	0.138798	0.713597	0.175831	0.187791	0.704417	0.154678	0.161337
a0d6bd2c-5bb2-4daf-9fa7-6982749b7abd	5d11db29-925c-4cd5-a231-300507c63116	590	28	28	2025-08-24T14:42:14.000429Z	0.218417	1.17551	1.56469	1.23134	0.955914	1.38413	1.20209	1.49865	1.67029	1.23342	1.07285	0.154262	0.264278	1.5294	1.31456	0.19743	1.44091	1.39499	0.650802	0.685488	1.2849	0.573126	1.49773	1.54514	0.246558	1.64595	1.2671	1.40727	0.414928	0.208252	1.13919	1.03229	1.17143	0.207448	0.163685	0.211354	1.49565	0.178095	1.57442	0.258333	0.27731	1.4278	0.243724	0.237886
03a6e1c5-d6a1-4221-9c2b-165133fa2b6a	5d11db29-925c-4cd5-a231-300507c63116	740	28	28	2025-08-24T14:42:30.000429Z	0.164064	0.592372	0.791182	0.6087	0.518719	0.688755	0.61956	0.782557	0.773363	0.621972	0.585068	0.133736	0.155106	0.756013	0.620136	0.127504	0.619255	0.623914	0.331123	0.342112	0.592056	0.330303	0.667576	0.691545	0.180577	0.765962	0.6381	0.695995	0.264616	0.15376	0.613842	0.470684	0.595888	0.154967	0.13582	0.144318	0.689543	0.138794	0.712122	0.175832	0.187964	0.703854	0.157171	0.161475
b800246f-2349-4b03-a63a-5ef28c0d55ca	5d11db29-925c-4cd5-a231-300507c63116	590	28	28	2025-08-24T15:02:14.000429Z	0.217765	1.16618	1.5677	1.23318	0.954249	1.36344	1.19945	1.5104	1.67648	1.2217	1.0673	0.154841	0.264543	1.53582	1.32069	0.197733	1.44247	1.39274	0.648979	0.69074	1.28617	0.573868	1.49774	1.54024	0.24973	1.64716	1.26551	1.41475	0.416162	0.208673	1.14626	1.03347	1.17632	0.20895	0.164493	0.211894	1.48217	0.178459	1.57392	0.258599	0.277613	1.42812	0.246978	0.237979
91da23d7-e4aa-4d13-8421-f1912cfec56c	5d11db29-925c-4cd5-a231-300507c63116	740	28	28	2025-08-24T15:02:30.000429Z	0.163627	0.587525	0.79423	0.607891	0.517864	0.681815	0.618655	0.783404	0.773888	0.61239	0.582784	0.13395	0.155093	0.758038	0.621629	0.127738	0.619428	0.624147	0.33066	0.34523	0.591938	0.330389	0.667297	0.69115	0.181051	0.764464	0.638014	0.698447	0.264997	0.153746	0.615325	0.470306	0.599911	0.155036	0.136168	0.144329	0.690854	0.138826	0.710918	0.175732	0.187963	0.703518	0.155868	0.161387
a017e055-2e53-4a97-86d5-46be1cec253e	5d11db29-925c-4cd5-a231-300507c63116	590	28	28	2025-08-24T15:22:12.000429Z	0.218668	1.17625	1.57954	1.2277	0.954717	1.35425	1.19816	1.52147	1.67752	1.2194	1.07261	0.155392	0.264622	1.54438	1.32309	0.198211	1.44023	1.39491	0.647895	0.693904	1.2857	0.573958	1.49561	1.53792	0.24989	1.64647	1.2669	1.40562	0.414828	0.208577	1.15035	1.03357	1.1739	0.207412	0.164664	0.211159	1.49087	0.178397	1.57388	0.258385	0.277906	1.42865	0.24071	0.237903
b4f13dcd-2735-4534-bf0e-9362f8fbee97	5d11db29-925c-4cd5-a231-300507c63116	740	28	28	2025-08-24T15:22:28.000429Z	0.163587	0.591304	0.794062	0.607428	0.517283	0.670763	0.616871	0.79013	0.774407	0.613828	0.584996	0.134234	0.154983	0.759664	0.622543	0.128115	0.618796	0.623094	0.330931	0.353053	0.591125	0.330226	0.666174	0.689899	0.181864	0.762448	0.637487	0.697024	0.264616	0.153765	0.616097	0.470369	0.598093	0.155217	0.136061	0.144019	0.689863	0.138925	0.71014	0.175723	0.18815	0.703104	0.155334	0.161172
f45495fc-3d35-4123-809e-a982fa219791	5d11db29-925c-4cd5-a231-300507c63116	590	28	28	2025-08-24T15:42:15.000429Z	0.217316	1.17358	1.58382	1.22837	0.953806	1.34547	1.19522	1.51665	1.67932	1.21619	1.06845	0.154912	0.264891	1.55231	1.32215	0.198466	1.44	1.40043	0.645197	0.692069	1.28306	0.573025	1.49941	1.54496	0.248608	1.65039	1.26865	1.4313	0.415209	0.208417	1.1548	1.03358	1.17342	0.207594	0.16541	0.207554	1.4808	0.178183	1.57296	0.25815	0.277967	1.42778	0.245621	0.237672
6ffeefc2-f5ff-4b9e-9d44-018d5a0177f2	5d11db29-925c-4cd5-a231-300507c63116	740	28	28	2025-08-24T15:42:31.000429Z	0.163678	0.588058	0.798458	0.607065	0.516702	0.669135	0.616459	0.786047	0.7741	0.612779	0.584167	0.134394	0.154894	0.761399	0.623181	0.1284	0.616301	0.623316	0.329692	0.349316	0.588226	0.329556	0.66698	0.690127	0.182182	0.762754	0.637506	0.700828	0.265049	0.153775	0.619131	0.469987	0.595015	0.154604	0.13674	0.144199	0.684994	0.138997	0.708693	0.175677	0.1882	0.703066	0.154205	0.161098
ecefd619-a0c0-43b7-af1d-fbd42ec4c3dc	5d11db29-925c-4cd5-a231-300507c63116	590	28	28	2025-08-24T16:02:13.000429Z	0.217828	1.17918	1.59256	1.22792	0.953471	1.34489	1.19318	1.51984	1.68061	1.21691	1.07232	0.155487	0.265249	1.55948	1.31912	0.198784	1.43941	1.40601	0.646726	0.69213	1.28314	0.573509	1.49226	1.53463	0.250111	1.65204	1.27043	1.44654	0.415991	0.209093	1.16382	1.03523	1.17736	0.207883	0.16614	0.208915	1.48555	0.17819	1.57359	0.258417	0.278466	1.42895	0.236957	0.238445
d37abe9c-867c-4fa4-996a-2a72979a3444	5d11db29-925c-4cd5-a231-300507c63116	740	28	28	2025-08-24T16:02:30.000429Z	0.163427	0.590196	0.800081	0.607342	0.516202	0.669567	0.615266	0.785275	0.773998	0.611255	0.585613	0.134712	0.155345	0.761194	0.62135	0.128563	0.615054	0.62504	0.330646	0.352101	0.588501	0.329258	0.668136	0.68988	0.180856	0.762007	0.63758	0.706833	0.265251	0.153868	0.6213	0.470298	0.593977	0.154633	0.13688	0.14501	0.688548	0.138589	0.708036	0.175665	0.18842	0.702844	0.154318	0.161111
5c356701-ecfe-40e4-9e3c-ee7fa2dc1988	5d11db29-925c-4cd5-a231-300507c63116	590	28	28	2025-08-24T16:22:13.000429Z	0.218161	1.17483	1.5982	1.22648	0.952008	1.34089	1.19008	1.52364	1.68414	1.20129	1.06955	0.155708	0.26506	1.5701	1.32125	0.198928	1.43855	1.40548	0.6448	0.698024	1.28554	0.574073	1.49471	1.53456	0.250778	1.65058	1.26931	1.45834	0.416551	0.209089	1.16987	1.03594	1.18762	0.208178	0.166455	0.209958	1.47547	0.178245	1.57393	0.258255	0.27883	1.42962	0.242504	0.238306
4f4b0545-ca08-4bef-85e8-3558c7137037	5d11db29-925c-4cd5-a231-300507c63116	740	28	28	2025-08-24T16:22:29.000429Z	0.164149	0.588786	0.803006	0.605847	0.514949	0.668642	0.613949	0.782633	0.774008	0.604348	0.584539	0.13451	0.15455	0.763845	0.623113	0.12841	0.613567	0.623363	0.328486	0.351724	0.588956	0.32952	0.667229	0.688336	0.1832	0.760468	0.63634	0.710033	0.265573	0.153822	0.623028	0.470358	0.595507	0.154311	0.137177	0.145058	0.685551	0.138718	0.707056	0.175497	0.188488	0.702244	0.155186	0.1613
6e865bb8-a2ae-4ed8-ac05-8de887219030	5d11db29-925c-4cd5-a231-300507c63116	590	28	28	2025-08-24T16:42:13.000429Z	0.219186	1.17477	1.60328	1.22251	0.951116	1.34304	1.18851	1.51905	1.68635	1.2085	1.07149	0.155948	0.265428	1.57435	1.32691	0.198964	1.43772	1.39983	0.647363	0.709512	1.2888	0.574847	1.50048	1.53631	0.253678	1.6519	1.2686	1.46757	0.416151	0.20943	1.17848	1.03711	1.1871	0.207387	0.165665	0.213446	1.46891	0.178141	1.57417	0.258217	0.279234	1.43065	0.240737	0.238163
aa134294-a87f-4d68-961c-f7d2063ac523	5d11db29-925c-4cd5-a231-300507c63116	740	28	28	2025-08-24T16:42:28.000429Z	0.164018	0.589016	0.803709	0.606543	0.514338	0.667318	0.61255	0.778727	0.773959	0.603393	0.58647	0.134664	0.15487	0.764485	0.623536	0.128832	0.61455	0.621641	0.329381	0.357481	0.588293	0.330198	0.668683	0.689089	0.184529	0.759985	0.635878	0.713211	0.265841	0.153863	0.626501	0.470093	0.594792	0.15447	0.137036	0.144431	0.68561	0.138555	0.706097	0.175565	0.188563	0.702543	0.155345	0.161124
c02f2b5d-8d02-4d2f-9aa7-8d92d64fa1a6	5d11db29-925c-4cd5-a231-300507c63116	590	28	28	2025-08-24T17:02:13.000429Z	0.217991	1.17681	1.60921	1.2217	0.951354	1.33143	1.18673	1.4961	1.68715	1.21912	1.07437	0.15653	0.265525	1.58177	1.32657	0.199682	1.44083	1.3939	0.6484	0.709965	1.2901	0.575581	1.50105	1.53988	0.253897	1.65553	1.2702	1.47525	0.416171	0.20941	1.19006	1.0372	1.18689	0.207273	0.166724	0.213439	1.46502	0.178657	1.57415	0.25843	0.279643	1.43091	0.241452	0.238241
7838b787-9332-4da2-b901-78e8b1fe3350	5d11db29-925c-4cd5-a231-300507c63116	740	28	28	2025-08-24T17:02:29.000429Z	0.164135	0.589928	0.807109	0.604777	0.513485	0.661487	0.6112	0.764755	0.772802	0.609526	0.589241	0.134834	0.154646	0.767151	0.626016	0.128776	0.614943	0.619604	0.329141	0.360421	0.58843	0.330227	0.666857	0.686853	0.184568	0.75964	0.636192	0.7153	0.265382	0.15364	0.627804	0.470226	0.593318	0.154466	0.137151	0.145052	0.683406	0.138674	0.705012	0.175365	0.188647	0.701321	0.154113	0.161118
25cbf4cd-f522-41cd-a2ee-739926b8b280	5d11db29-925c-4cd5-a231-300507c63116	590	28	28	2025-08-24T17:22:12.000429Z	0.216923	1.17532	1.61986	1.22093	0.950632	1.31951	1.18429	1.46688	1.68996	1.21529	1.07297	0.156852	0.265726	1.59068	1.31957	0.200166	1.44285	1.39863	0.649106	0.701366	1.29134	0.576793	1.50371	1.53487	0.254664	1.65247	1.27053	1.48247	0.416181	0.20972	1.19561	1.03831	1.19087	0.207575	0.166772	0.215284	1.47564	0.178243	1.57398	0.258516	0.280039	1.4314	0.237315	0.238531
d910b250-51af-42d5-ae88-ae2f42de59d9	5d11db29-925c-4cd5-a231-300507c63116	740	28	28	2025-08-24T17:22:28.000429Z	0.163538	0.589123	0.809024	0.604602	0.512655	0.656442	0.610865	0.752013	0.774393	0.609323	0.590625	0.135257	0.15447	0.769262	0.62365	0.129129	0.614169	0.621011	0.328884	0.362604	0.588651	0.3306	0.666896	0.686251	0.185259	0.757899	0.635313	0.717368	0.26548	0.153846	0.630976	0.470187	0.593674	0.154107	0.137953	0.145598	0.681525	0.138661	0.704011	0.175488	0.188927	0.701293	0.154063	0.161193
e755cf3f-89b1-4109-8e41-89899cedc16e	5d11db29-925c-4cd5-a231-300507c63116	590	28	28	2025-08-24T17:42:14.000429Z	0.216108	1.17988	1.62527	1.2226	0.950147	1.31359	1.18244	1.51237	1.69132	1.20376	1.0585	0.157441	0.266047	1.60069	1.30544	0.200485	1.4438	1.40322	0.651079	0.707147	1.29276	0.576729	1.50495	1.54007	0.255131	1.64801	1.26898	1.48802	0.416346	0.209365	1.1991	1.0377	1.19172	0.207396	0.166558	0.214257	1.47086	0.178197	1.57324	0.258401	0.279903	1.42981	0.241638	0.238059
5ee5d365-552d-4f4e-a77a-19d42e82c13f	5d11db29-925c-4cd5-a231-300507c63116	740	28	28	2025-08-24T17:42:30.000429Z	0.163185	0.589444	0.810663	0.60556	0.512261	0.65367	0.610338	0.768602	0.774633	0.605046	0.585342	0.135767	0.154342	0.771572	0.617542	0.129555	0.613512	0.62036	0.329527	0.359445	0.58872	0.330556	0.667419	0.686098	0.185517	0.754418	0.634789	0.718821	0.265928	0.153698	0.632353	0.469997	0.593973	0.154272	0.138235	0.145495	0.679291	0.138797	0.703205	0.175536	0.188985	0.700941	0.152913	0.160921
ac2b2925-4acd-4d3f-9811-6dd82fa65985	5d11db29-925c-4cd5-a231-300507c63116	590	28	28	2025-08-24T18:02:13.000429Z	0.215978	1.17855	1.6313	1.21986	0.949201	1.3164	1.18073	1.50859	1.69378	1.20385	1.05335	0.157815	0.266416	1.611	1.29782	0.200821	1.44501	1.40923	0.656871	0.712215	1.29379	0.577555	1.50636	1.53906	0.257346	1.64713	1.271	1.49667	0.418834	0.210032	1.20543	1.03953	1.19099	0.208213	0.16752	0.215701	1.46865	0.178597	1.57445	0.259011	0.280479	1.43054	0.240176	0.238672
56474d79-51c0-4283-b905-8757f34d2b07	5d11db29-925c-4cd5-a231-300507c63116	740	28	28	2025-08-24T18:02:30.000429Z	0.163355	0.58975	0.812945	0.60403	0.511839	0.654375	0.608504	0.766055	0.774876	0.600899	0.582718	0.135562	0.154653	0.773904	0.613398	0.129597	0.614182	0.622549	0.331734	0.365011	0.587654	0.330619	0.666188	0.68448	0.186921	0.752161	0.6352	0.721271	0.267102	0.153838	0.63584	0.469969	0.593138	0.154644	0.137912	0.145389	0.679559	0.138742	0.702152	0.175539	0.189164	0.700528	0.154647	0.161213
aadd7182-b076-44dd-8fae-3ae389dfcafc	5d11db29-925c-4cd5-a231-300507c63116	590	28	28	2025-08-24T18:22:12.000429Z	0.216631	1.17885	1.63596	1.22107	0.948441	1.3097	1.17811	1.4933	1.69643	1.19824	1.04805	0.158007	0.266361	1.62261	1.28647	0.201214	1.44451	1.40772	0.655633	0.731273	1.29448	0.577812	1.50957	1.53916	0.258108	1.64607	1.27128	1.50318	0.420829	0.209917	1.21157	1.04013	1.1895	0.20847	0.168669	0.21226	1.45713	0.178703	1.57416	0.259036	0.280862	1.43152	0.250018	0.238586
0fb5f185-d9ff-4ab3-b602-cb151447fa27	5d11db29-925c-4cd5-a231-300507c63116	740	28	28	2025-08-24T18:22:28.000429Z	0.164133	0.589545	0.81438	0.603953	0.510871	0.652583	0.607416	0.75756	0.774393	0.604223	0.580634	0.135927	0.154497	0.776603	0.606638	0.12985	0.612236	0.621674	0.331542	0.368489	0.587288	0.330637	0.66633	0.684326	0.187547	0.750649	0.634576	0.72217	0.268174	0.15384	0.634565	0.470047	0.590773	0.154928	0.13782	0.145809	0.677402	0.138837	0.701674	0.175589	0.189576	0.700286	0.156423	0.161119
a5787ae7-d50e-4cff-9e93-f9c5c6532664	5d11db29-925c-4cd5-a231-300507c63116	590	28	28	2025-08-24T18:42:14.000429Z	0.216725	1.17732	1.64334	1.21918	0.94796	1.32396	1.17692	1.48949	1.69715	1.19436	1.04627	0.158928	0.266523	1.63306	1.29376	0.201562	1.44264	1.40062	0.65509	0.728345	1.29102	0.577121	1.50576	1.53622	0.260338	1.64585	1.27041	1.50477	0.420716	0.210023	1.22108	1.04012	1.1941	0.20803	0.168278	0.215152	1.46469	0.178478	1.57459	0.258903	0.280641	1.43087	0.247899	0.237934
ae575180-697b-44c5-b1be-bd97410cbb0e	5d11db29-925c-4cd5-a231-300507c63116	740	28	28	2025-08-24T18:42:30.000429Z	0.163797	0.58932	0.815125	0.605159	0.510805	0.654797	0.607627	0.755943	0.774675	0.5992	0.580165	0.136831	0.156044	0.778866	0.607046	0.130333	0.611497	0.617135	0.330719	0.364306	0.584697	0.329987	0.667664	0.684405	0.186429	0.750112	0.633678	0.72251	0.268348	0.153771	0.638923	0.469808	0.590974	0.154466	0.138751	0.144418	0.678417	0.138607	0.700355	0.175508	0.189424	0.700329	0.156479	0.16092
48b30fd3-c753-4452-b118-35d8132e6d1a	5d11db29-925c-4cd5-a231-300507c63116	590	28	28	2025-08-24T19:02:13.000429Z	0.216509	1.1778	1.64698	1.22175	0.94625	1.31257	1.17384	1.50154	1.7015	1.18449	1.04666	0.158865	0.267371	1.64792	1.29355	0.202053	1.44417	1.4022	0.651753	0.72793	1.28676	0.578136	1.50277	1.52756	0.261882	1.6474	1.27233	1.51499	0.420795	0.210647	1.23279	1.0413	1.20246	0.209622	0.169229	0.213238	1.44942	0.178948	1.5741	0.259126	0.281111	1.43236	0.24305	0.238324
f2ab08d2-d1c0-4351-b611-77db7a7925c0	5d11db29-925c-4cd5-a231-300507c63116	740	28	28	2025-08-24T19:02:29.000429Z	0.163564	0.589031	0.817253	0.604049	0.50927	0.654521	0.606274	0.758121	0.775024	0.597472	0.579907	0.13625	0.154388	0.783712	0.610224	0.130385	0.61057	0.616839	0.329457	0.364361	0.583994	0.33022	0.667626	0.682975	0.189439	0.749537	0.634334	0.723799	0.268176	0.154044	0.64099	0.470087	0.592546	0.15475	0.138862	0.146671	0.671059	0.138865	0.699433	0.17548	0.189447	0.700008	0.156504	0.160945
ea240902-a8f6-4b34-807f-61cf4ee8b5e6	5d11db29-925c-4cd5-a231-300507c63116	590	28	28	2025-08-24T19:22:13.000429Z	0.216609	1.1765	1.65525	1.21869	0.946612	1.3166	1.17355	1.51441	1.70315	1.18835	1.04713	0.159522	0.267471	1.65732	1.29871	0.202652	1.44374	1.4012	0.651804	0.736514	1.28824	0.578325	1.50911	1.53552	0.264835	1.64641	1.2704	1.5151	0.421692	0.211056	1.23876	1.04175	1.20098	0.2094	0.169043	0.217241	1.458	0.178856	1.57455	0.25912	0.281171	1.43165	0.244725	0.238064
4180c029-5a58-42b6-a327-8fecd6bfac9f	5d11db29-925c-4cd5-a231-300507c63116	740	28	28	2025-08-24T19:22:29.000429Z	0.163164	0.588723	0.817727	0.603473	0.509285	0.651877	0.605605	0.764634	0.775616	0.594346	0.579675	0.136574	0.154655	0.785888	0.610952	0.130762	0.611071	0.616673	0.330056	0.367753	0.582374	0.330228	0.665318	0.68175	0.191634	0.748166	0.632199	0.725574	0.26835	0.153991	0.643301	0.469803	0.591515	0.155131	0.138901	0.145515	0.67467	0.138725	0.698559	0.175436	0.18954	0.699186	0.155395	0.160486
aea5e9eb-e288-4eb2-9ecf-48425ffe63a3	5d11db29-925c-4cd5-a231-300507c63116	590	28	28	2025-08-24T19:42:14.000429Z	0.216639	1.17934	1.6593	1.2217	0.945228	1.30365	1.17051	1.53736	1.70583	1.18508	1.04849	0.159193	0.267584	1.67012	1.2956	0.2027	1.44518	1.40663	0.652609	0.730937	1.28649	0.57895	1.50684	1.52675	0.266063	1.64532	1.27362	1.52683	0.421578	0.2112	1.24659	1.04261	1.20383	0.210155	0.169749	0.214547	1.44342	0.179047	1.57464	0.259099	0.281171	1.43245	0.240662	0.237907
cfdcffc9-d7e5-4505-9ee2-5819a5a43809	5d11db29-925c-4cd5-a231-300507c63116	740	28	28	2025-08-24T19:42:30.000429Z	0.163453	0.589266	0.820802	0.603865	0.508182	0.651102	0.605149	0.771653	0.77503	0.59743	0.580406	0.136634	0.15435	0.789361	0.610949	0.130874	0.60947	0.617983	0.330977	0.370801	0.582592	0.330637	0.66703	0.681845	0.192266	0.746688	0.633395	0.72606	0.268574	0.154364	0.642892	0.47006	0.591407	0.155362	0.138813	0.146451	0.67203	0.138819	0.698141	0.175502	0.189619	0.699366	0.154597	0.160771
[truncated: 52 more columns]

## Sheet: Tab 8. Biolog dphage_2 PM01
Id	PlateId	Wavelength	Actual Temperature Celsius	Target Temperature Celsius	Read At	Negative Control	L-Arabinose	N-Acetyl-DGlucosamine	D-Saccharic Acid	Succinic Acid	D-Galactose	L-Aspartic Acid	L-Proline	D-Alanine	D-Trehalose	D-Mannose	Dulcitol	D-Serine	D-Sorbitol	Glycerol	L-Fucose	D-Glucuronic Acid	D-Gluconic Acid	D,L-a-Glycerol- Phosphate	D-Xylose	L-Lactic Acid	Formic Acid	D-Mannitol	L-Glutamic Acid	D-Glucose-6 Phosphate	D-Galactonic Acid-g-Lactone	D,L-Malic Acid	D-Ribose	Tween 20	L-Rhamnose	D-Fructose	Acetic Acid	a-D-Glucose	Maltose	D-Melibiose	Thymidine	L-Asparagine	D-Aspartic Acid	D-Glucosaminic Acid	1,2-Propanediol	Tween 40	a-Keto-Glutaric Acid	a-Keto-Butyric Acid	a-Methyl-DGalactoside
5a4d5788-edd6-494c-8b51-7824b2cc7427	92cff9ea-4838-40cf-b541-bcb98c919c3f	590	28	28	2025-08-22T20:02:53.000429Z	0.130396	0.121875	0.130834	0.129226	0.125892	0.128305	0.129907	0.11831	0.130661	0.129696	0.130785	0.133437	0.139841	0.137339	0.143365	0.142783	0.144274	0.1426	0.143021	0.141012	0.138554	0.143149	0.143756	0.1862	0.13611	0.15128	0.142606	0.156274	0.144909	0.147555	0.139832	0.137245	0.14553	0.151693	0.155256	0.167927	0.134792	0.137017	0.136109	0.134939	0.140872	0.143229	0.137579	0.137983
e9aa3d82-d226-47db-920a-602f49b4943b	92cff9ea-4838-40cf-b541-bcb98c919c3f	740	28	28	2025-08-22T20:03:09.000429Z	0.117917	0.109783	0.117243	0.116036	0.113811	0.115809	0.117415	0.109091	0.117832	0.118059	0.118386	0.119819	0.087948	0.087124	0.090511	0.091906	0.093559	0.09078	0.089504	0.089344	0.088282	0.087777	0.091365	0.114198	0.116349	0.118578	0.111763	0.126671	0.115109	0.118665	0.114954	0.110701	0.114681	0.11988	0.119499	0.136203	0.109643	0.111498	0.11153	0.112226	0.117697	0.119792	0.11473	0.114911
4c10f8b7-77ce-4fae-9896-a98a4352df3e	92cff9ea-4838-40cf-b541-bcb98c919c3f	590	28	28	2025-08-22T20:22:53.000429Z	0.125738	0.121115	0.124709	0.122507	0.124057	0.125679	0.124544	0.117882	0.123484	0.125589	0.125217	0.127907	0.126698	0.127282	0.133047	0.134646	0.133676	0.136034	0.137034	0.138783	0.134348	0.142862	0.138302	0.174344	0.130287	0.134826	0.133562	0.143498	0.134357	0.137995	0.137533	0.13626	0.140914	0.147393	0.148249	0.157652	0.126822	0.126317	0.128126	0.128512	0.139531	0.141619	0.13131	0.134877
60e6f589-379e-497f-96c6-338477059385	92cff9ea-4838-40cf-b541-bcb98c919c3f	740	28	28	2025-08-22T20:23:09.000429Z	0.114336	0.10931	0.11282	0.111765	0.112885	0.114002	0.113123	0.108863	0.112572	0.114818	0.114325	0.116437	0.082578	0.082867	0.084684	0.087	0.088072	0.085898	0.086815	0.088526	0.084363	0.089048	0.088033	0.106428	0.111771	0.114398	0.11317	0.123229	0.11439	0.116779	0.112332	0.109834	0.112735	0.116771	0.115167	0.126691	0.105236	0.105896	0.107081	0.108439	0.117196	0.11821	0.110093	0.112631
20b4ac49-bd2f-4e14-969c-20edc6927ac8	92cff9ea-4838-40cf-b541-bcb98c919c3f	590	28	28	2025-08-22T20:42:52.000429Z	0.131089	0.126483	0.129957	0.127713	0.130134	0.130696	0.130183	0.122487	0.127254	0.13096	0.128785	0.132238	0.131878	0.132329	0.137999	0.139661	0.138397	0.142372	0.145322	0.147538	0.141837	0.145059	0.143359	0.167445	0.136488	0.138781	0.139912	0.148828	0.137898	0.146896	0.147167	0.141369	0.149422	0.151966	0.151908	0.159057	0.130919	0.130372	0.133196	0.134086	0.14317	0.149134	0.137688	0.141878
8a0e9740-5092-45de-afdf-74ea8c8e6219	92cff9ea-4838-40cf-b541-bcb98c919c3f	740	28	28	2025-08-22T20:43:08.000429Z	0.117382	0.112606	0.115928	0.114939	0.116622	0.116956	0.116569	0.111844	0.114656	0.117639	0.116276	0.118306	0.084965	0.085145	0.088758	0.090068	0.091559	0.08953	0.09091	0.094451	0.089718	0.091704	0.090393	0.100232	0.114886	0.117107	0.11831	0.125441	0.116534	0.122345	0.1197	0.113067	0.117934	0.119101	0.117031	0.126493	0.107762	0.108006	0.110142	0.111785	0.119655	0.123183	0.114634	0.117032
f55993fc-b447-49a7-ab8c-e912aa38c447	92cff9ea-4838-40cf-b541-bcb98c919c3f	590	28	28	2025-08-22T21:02:53.000429Z	0.137895	0.133419	0.136908	0.134607	0.132143	0.137407	0.134405	0.127116	0.132307	0.136899	0.134538	0.138792	0.137782	0.139413	0.143512	0.146771	0.146084	0.149399	0.151556	0.1525	0.143453	0.14778	0.151746	0.17999	0.143556	0.143996	0.143078	0.156969	0.143979	0.152862	0.155067	0.147221	0.152948	0.15805	0.15759	0.16426	0.134231	0.132843	0.140165	0.141503	0.151264	0.15175	0.138893	0.149228
e5f6d175-6ee8-4d14-b300-c3ac8457e9ce	92cff9ea-4838-40cf-b541-bcb98c919c3f	740	28	28	2025-08-22T21:03:09.000429Z	0.122922	0.117274	0.120805	0.119816	0.118543	0.121914	0.119677	0.115475	0.118114	0.12194	0.120244	0.123163	0.08933	0.09091	0.092337	0.094875	0.096503	0.093821	0.094939	0.096609	0.090317	0.091959	0.0947	0.107581	0.120254	0.120824	0.11864	0.130743	0.120556	0.126274	0.124715	0.117265	0.120685	0.123346	0.121165	0.128817	0.110023	0.109701	0.114936	0.117237	0.124597	0.125138	0.115763	0.122792
4794703d-8bf5-4932-86a1-9ce44c1980a2	92cff9ea-4838-40cf-b541-bcb98c919c3f	590	28	28	2025-08-22T21:22:52.000429Z	0.146489	0.140495	0.142511	0.142034	0.134361	0.141138	0.134944	0.129059	0.135917	0.142278	0.14298	0.15025	0.143656	0.147584	0.148493	0.157259	0.156956	0.149477	0.15447	0.162077	0.143523	0.148285	0.157339	0.179461	0.154974	0.150106	0.143782	0.175075	0.150108	0.159533	0.152035	0.14829	0.151837	0.165563	0.167885	0.171692	0.13623	0.136442	0.146725	0.148266	0.159925	0.150986	0.138791	0.148585
78e02ef2-d439-4664-a940-b8b790beea43	92cff9ea-4838-40cf-b541-bcb98c919c3f	740	28	28	2025-08-22T21:23:08.000429Z	0.125518	0.118868	0.123178	0.125066	0.120575	0.122874	0.119834	0.118848	0.1209	0.125951	0.126337	0.130036	0.092054	0.095351	0.094518	0.100563	0.102524	0.096078	0.097623	0.102475	0.093532	0.094964	0.099644	0.110374	0.124787	0.124606	0.118394	0.143211	0.123716	0.129909	0.124911	0.120365	0.121499	0.129511	0.128343	0.134031	0.112319	0.112083	0.118955	0.120768	0.130835	0.125433	0.116325	0.124844
ac958ede-2ecf-4476-8cfc-b6008800481b	92cff9ea-4838-40cf-b541-bcb98c919c3f	590	28	28	2025-08-22T21:42:49.000429Z	0.152467	0.145209	0.145414	0.145438	0.136995	0.142129	0.137965	0.136996	0.136854	0.142995	0.151114	0.159459	0.147028	0.151811	0.145431	0.16243	0.161535	0.149213	0.15783	0.168958	0.14944	0.15561	0.15929	0.186122	0.16033	0.154869	0.145794	0.177526	0.15643	0.164722	0.152547	0.152156	0.154373	0.171368	0.176312	0.173684	0.139297	0.140177	0.147885	0.153044	0.170998	0.151904	0.140053	0.161752
1819dded-53da-47c4-b1e9-d9a1bf384dd1	92cff9ea-4838-40cf-b541-bcb98c919c3f	740	28	28	2025-08-22T21:43:06.000429Z	0.127694	0.121903	0.12726	0.126353	0.12521	0.125066	0.12525	0.126632	0.121734	0.126681	0.131852	0.138203	0.093143	0.097044	0.100003	0.103	0.103415	0.098704	0.102631	0.103885	0.097591	0.098237	0.099541	0.114772	0.126557	0.124055	0.121384	0.143705	0.125828	0.132365	0.128317	0.122047	0.123381	0.131849	0.13393	0.134881	0.116719	0.114774	0.120604	0.1237	0.136709	0.129194	0.117295	0.137079
d8f062db-3871-45ee-96cb-efc9476afc29	92cff9ea-4838-40cf-b541-bcb98c919c3f	590	28	28	2025-08-22T22:02:53.000429Z	0.15951	0.150134	0.15706	0.148581	0.143793	0.161356	0.143143	0.183242	0.137832	0.152306	0.153191	0.165012	0.145166	0.155919	0.164709	0.170076	0.166459	0.153427	0.175132	0.174515	0.178194	0.162981	0.164093	0.199467	0.167699	0.160545	0.149394	0.181528	0.168066	0.170656	0.161636	0.154079	0.157721	0.177435	0.182539	0.175624	0.182091	0.142933	0.149325	0.162071	0.178834	0.158814	0.139565	0.187433
8195d5d5-0ae6-4224-98f9-f8a848ac1f63	92cff9ea-4838-40cf-b541-bcb98c919c3f	740	28	28	2025-08-22T22:03:09.000429Z	0.132297	0.126632	0.135712	0.130139	0.132077	0.138469	0.132507	0.162778	0.12391	0.134879	0.134546	0.141192	0.097668	0.102675	0.114456	0.106276	0.106504	0.105141	0.120235	0.105759	0.123813	0.106399	0.103764	0.124938	0.130178	0.129059	0.126662	0.144395	0.133728	0.136159	0.136366	0.125423	0.128024	0.136725	0.139907	0.138414	0.145119	0.11716	0.12621	0.127586	0.140549	0.135653	0.118042	0.155138
f58a683a-d852-4bd3-bf4b-1d5b6caf04bf	92cff9ea-4838-40cf-b541-bcb98c919c3f	590	28	28	2025-08-22T22:22:52.000429Z	0.172707	0.162759	0.176179	0.158791	0.202951	0.1933	0.183303	0.22173	0.170932	0.16767	0.15995	0.173459	0.177969	0.163602	0.190301	0.176153	0.170412	0.173727	0.196656	0.181399	0.205068	0.180955	0.168676	0.230164	0.175	0.176791	0.156422	0.184724	0.206235	0.177599	0.183521	0.162829	0.165084	0.183976	0.191181	0.182177	0.208973	0.145755	0.154522	0.18875	0.190329	0.208689	0.141224	0.206476
c7009d6a-9a25-4506-b135-00b5e2f634e9	92cff9ea-4838-40cf-b541-bcb98c919c3f	740	28	28	2025-08-22T22:23:08.000429Z	0.134759	0.132345	0.146844	0.135467	0.163507	0.159698	0.160892	0.181032	0.148255	0.145796	0.138973	0.146136	0.116706	0.106698	0.129742	0.10826	0.107493	0.118978	0.135649	0.108639	0.138824	0.117162	0.107588	0.149804	0.133318	0.140914	0.135628	0.144418	0.159686	0.137899	0.149834	0.131577	0.13379	0.13982	0.145148	0.142095	0.160584	0.119097	0.127218	0.138989	0.145595	0.173168	0.119225	0.165122
4eb75533-4cd8-4a28-84d9-a8425ac6011f	92cff9ea-4838-40cf-b541-bcb98c919c3f	590	28	28	2025-08-22T22:42:50.000429Z	0.206302	0.176345	0.189646	0.183776	0.21886	0.209773	0.222787	0.22864	0.214789	0.181395	0.167037	0.180916	0.203324	0.17667	0.209037	0.179798	0.175141	0.190073	0.213693	0.181725	0.223144	0.197989	0.17699	0.258346	0.180634	0.192852	0.195875	0.188243	0.248359	0.182394	0.197173	0.192771	0.178126	0.18999	0.196266	0.191882	0.218301	0.147316	0.160399	0.2007	0.204384	0.236128	0.19101	0.215334
9dd7d763-6957-40cc-8fbb-6ba7a507fbb8	92cff9ea-4838-40cf-b541-bcb98c919c3f	740	28	28	2025-08-22T22:43:06.000429Z	0.153748	0.140153	0.152203	0.149	0.174963	0.170177	0.17903	0.183862	0.179092	0.154767	0.143725	0.151257	0.129227	0.111378	0.139783	0.110809	0.108204	0.126941	0.143699	0.110043	0.144454	0.125394	0.115411	0.171629	0.134185	0.148779	0.159978	0.145933	0.183244	0.140392	0.155495	0.154901	0.142977	0.1429	0.147887	0.145411	0.165674	0.120179	0.127999	0.146168	0.156985	0.18654	0.158891	0.16783
c130b962-ed8c-47c8-807b-748be7f0c623	92cff9ea-4838-40cf-b541-bcb98c919c3f	590	28	28	2025-08-22T23:02:52.000429Z	0.194819	0.18758	0.196334	0.197071	0.251863	0.217265	0.224406	0.263894	0.221798	0.188	0.169057	0.195637	0.212184	0.191586	0.217992	0.185395	0.181816	0.19752	0.223778	0.185382	0.238968	0.212232	0.184949	0.273103	0.184424	0.201002	0.221569	0.1941	0.281686	0.183506	0.202475	0.212885	0.196341	0.198689	0.196985	0.201656	0.227719	0.147983	0.168724	0.200644	0.221155	0.252014	0.229186	0.233666
8a6de80c-4256-43fa-8770-74ff6eb08d20	92cff9ea-4838-40cf-b541-bcb98c919c3f	740	28	28	2025-08-22T23:03:08.000429Z	0.147997	0.14391	0.150387	0.152848	0.194525	0.170748	0.182274	0.205577	0.181132	0.157892	0.144669	0.159097	0.133125	0.115324	0.14221	0.118179	0.111109	0.132895	0.146736	0.113722	0.15141	0.13237	0.117297	0.177904	0.138185	0.152166	0.177203	0.150342	0.198508	0.145012	0.153475	0.162603	0.153903	0.149662	0.147555	0.153305	0.171977	0.120918	0.129786	0.150529	0.169221	0.193953	0.182443	0.17208
adb8f4c7-f914-4e99-bc32-ee3da4168188	92cff9ea-4838-40cf-b541-bcb98c919c3f	590	28	28	2025-08-22T23:22:52.000429Z	0.189579	0.206762	0.203723	0.208688	0.272161	0.218196	0.249825	0.289058	0.229261	0.200892	0.174185	0.196995	0.213372	0.199898	0.230095	0.191971	0.18999	0.210465	0.232964	0.189763	0.258965	0.223426	0.192076	0.29671	0.192004	0.213978	0.247537	0.201458	0.307067	0.187697	0.209718	0.235844	0.207986	0.200561	0.197588	0.214462	0.241751	0.150089	0.181018	0.191866	0.233287	0.279871	0.243241	0.237674
e514dd65-1e5d-4cac-82dc-358f42ad5095	92cff9ea-4838-40cf-b541-bcb98c919c3f	740	28	28	2025-08-22T23:23:09.000429Z	0.146688	0.150198	0.151306	0.157631	0.20647	0.17008	0.194124	0.216102	0.185654	0.165527	0.145474	0.157544	0.132004	0.118143	0.146937	0.122811	0.115677	0.140207	0.147446	0.115155	0.164159	0.137786	0.119951	0.189238	0.144602	0.157489	0.188566	0.155029	0.209737	0.148398	0.156373	0.178121	0.159828	0.151405	0.146325	0.159169	0.180405	0.122347	0.134422	0.146246	0.174709	0.20662	0.188581	0.169437
b13afe29-1dc8-4d68-a4c1-7cf00461fb66	92cff9ea-4838-40cf-b541-bcb98c919c3f	590	28	28	2025-08-22T23:42:52.000429Z	0.20036	0.229538	0.223297	0.21658	0.296352	0.22688	0.27129	0.295933	0.246263	0.221099	0.186333	0.19163	0.189345	0.204141	0.240892	0.1952	0.19599	0.225032	0.249541	0.193949	0.282946	0.247419	0.203173	0.309169	0.200149	0.220948	0.265065	0.206066	0.326617	0.190514	0.223236	0.26843	0.222228	0.203756	0.20362	0.212684	0.259444	0.154434	0.194439	0.192787	0.237699	0.306053	0.243029	0.233779
71c6a616-79d6-40b4-8c4a-a028728cdf4d	92cff9ea-4838-40cf-b541-bcb98c919c3f	740	28	28	2025-08-22T23:43:08.000429Z	0.156188	0.165806	0.162895	0.1618	0.22023	0.174502	0.205686	0.211427	0.193532	0.178143	0.152513	0.153473	0.115604	0.120647	0.153759	0.125626	0.119287	0.148965	0.154715	0.119123	0.174437	0.146934	0.12538	0.19816	0.153172	0.1597	0.200558	0.157684	0.218535	0.149282	0.162426	0.195026	0.1668	0.152453	0.147983	0.152925	0.190589	0.125213	0.139987	0.146136	0.174843	0.221896	0.185824	0.166936
576223ca-93c0-4a38-8850-ddf779970cdc	92cff9ea-4838-40cf-b541-bcb98c919c3f	590	28	28	2025-08-23T00:02:53.000429Z	0.209854	0.240506	0.236006	0.226537	0.31596	0.237717	0.287842	0.305299	0.2726	0.238782	0.200407	0.192462	0.188486	0.209835	0.259527	0.196955	0.202617	0.242009	0.273358	0.199229	0.302875	0.249673	0.219151	0.335127	0.206066	0.235136	0.291563	0.212894	0.342939	0.193539	0.228965	0.301406	0.236335	0.20491	0.208107	0.213635	0.276797	0.157674	0.206854	0.198595	0.242594	0.347518	0.221612	0.234214
ab93fdb3-05d5-4c1a-97cb-2fb4bad2f951	92cff9ea-4838-40cf-b541-bcb98c919c3f	740	28	28	2025-08-23T00:03:08.000429Z	0.162803	0.172095	0.17166	0.165918	0.234593	0.18027	0.214967	0.216567	0.204099	0.188362	0.160599	0.152807	0.11773	0.124795	0.161686	0.124036	0.123417	0.159045	0.16499	0.118722	0.183903	0.146238	0.134305	0.211558	0.158593	0.16856	0.216364	0.161335	0.227095	0.150154	0.164449	0.207969	0.175627	0.151569	0.149456	0.151008	0.201513	0.127327	0.145763	0.148429	0.176157	0.244958	0.168905	0.167482
72371417-7b58-4479-9178-f9c95582a191	92cff9ea-4838-40cf-b541-bcb98c919c3f	590	28	28	2025-08-23T00:22:54.000429Z	0.221674	0.250442	0.233401	0.229508	0.342004	0.250705	0.300051	0.313797	0.291142	0.266124	0.2237	0.199303	0.202502	0.219022	0.275497	0.20252	0.212944	0.258409	0.29656	0.205253	0.323424	0.25056	0.242493	0.362117	0.213495	0.247022	0.329061	0.219093	0.361031	0.199264	0.23565	0.330346	0.252764	0.208963	0.212545	0.21849	0.298643	0.163592	0.227301	0.209722	0.248367	0.372712	0.198675	0.241897
b915970e-c8b6-466f-9e7c-12a8ea86f9eb	92cff9ea-4838-40cf-b541-bcb98c919c3f	740	28	28	2025-08-23T00:23:10.000429Z	0.167895	0.176809	0.172038	0.167014	0.253182	0.187231	0.222503	0.219036	0.21151	0.20205	0.177937	0.156156	0.124114	0.132935	0.168003	0.126687	0.128347	0.168015	0.173411	0.122076	0.192858	0.143345	0.146703	0.223457	0.162375	0.177414	0.237171	0.163851	0.235995	0.152634	0.171456	0.222177	0.185467	0.151508	0.150453	0.151801	0.215997	0.131027	0.158077	0.153647	0.178143	0.259933	0.151693	0.170229
f6b48eec-d0c9-4993-a0c6-0515875d0ded	92cff9ea-4838-40cf-b541-bcb98c919c3f	590	28	28	2025-08-23T00:42:50.000429Z	0.231698	0.257729	0.228767	0.239359	0.366827	0.264535	0.313298	0.309217	0.29945	0.299518	0.236345	0.215037	0.212087	0.227626	0.285369	0.211622	0.246109	0.273663	0.309527	0.213699	0.338435	0.265748	0.260802	0.397682	0.220839	0.257651	0.368887	0.227113	0.375753	0.220295	0.245438	0.348226	0.272029	0.215206	0.220696	0.225118	0.321429	0.175434	0.25438	0.229178	0.254423	0.399571	0.186123	0.252434
4d61398d-1c50-4d1c-b209-6ec17e09ea80	92cff9ea-4838-40cf-b541-bcb98c919c3f	740	28	28	2025-08-23T00:43:06.000429Z	0.172362	0.181621	0.17023	0.173572	0.265351	0.190704	0.23011	0.216434	0.214521	0.219395	0.186075	0.16412	0.129966	0.139933	0.169497	0.130747	0.15402	0.178185	0.181312	0.126233	0.200321	0.14923	0.155617	0.245879	0.165448	0.181893	0.261923	0.167841	0.244141	0.163895	0.178646	0.230921	0.196484	0.15412	0.153854	0.154797	0.231825	0.137491	0.179218	0.163701	0.180992	0.272921	0.143674	0.174698
0fcf5dd1-5c9e-418c-a793-ad11094206e8	92cff9ea-4838-40cf-b541-bcb98c919c3f	590	28	28	2025-08-23T01:02:52.000429Z	0.244568	0.263478	0.245935	0.242902	0.392087	0.270619	0.328567	0.335243	0.312707	0.337756	0.23141	0.230313	0.229133	0.235096	0.293934	0.242316	0.240718	0.291731	0.322984	0.224491	0.347638	0.271206	0.279121	0.434543	0.230468	0.269853	0.424881	0.23849	0.387652	0.25713	0.247412	0.362033	0.293987	0.227131	0.235319	0.240258	0.368621	0.184547	0.252925	0.261031	0.260159	0.425389	0.200595	0.26365
293d55df-9961-46ba-a25c-0fe18f0e628c	92cff9ea-4838-40cf-b541-bcb98c919c3f	740	28	28	2025-08-23T01:03:08.000429Z	0.179408	0.186096	0.17825	0.177427	0.283796	0.192725	0.239001	0.230279	0.222154	0.240859	0.180246	0.17173	0.141715	0.143034	0.174648	0.148529	0.150121	0.190196	0.189738	0.130074	0.206209	0.152874	0.165427	0.266126	0.170317	0.187384	0.29685	0.173634	0.250469	0.18602	0.182034	0.240172	0.212598	0.160322	0.161544	0.163421	0.258035	0.143023	0.17902	0.182391	0.184197	0.289776	0.152243	0.180196
6ba0c5f7-7a4c-45db-a771-f8c6b8a1ca7d	92cff9ea-4838-40cf-b541-bcb98c919c3f	590	28	28	2025-08-23T01:22:53.000429Z	0.261174	0.271447	0.259855	0.246407	0.421545	0.272264	0.351165	0.356363	0.333002	0.360438	0.212863	0.246755	0.236779	0.2428	0.304287	0.272773	0.246804	0.310827	0.334881	0.234442	0.359915	0.293082	0.291653	0.477212	0.240905	0.281955	0.475988	0.252246	0.397511	0.249784	0.254354	0.377913	0.318971	0.261212	0.263733	0.263315	0.416548	0.186455	0.253474	0.284019	0.266567	0.476279	0.21329	0.276185
fe370108-5edd-41c5-9b4a-7e10b4845d36	92cff9ea-4838-40cf-b541-bcb98c919c3f	740	28	28	2025-08-23T01:23:09.000429Z	0.187591	0.191193	0.185497	0.179341	0.299926	0.190182	0.251544	0.238785	0.231979	0.254498	0.163183	0.180479	0.146337	0.147494	0.182433	0.167337	0.15408	0.204155	0.198366	0.136471	0.213593	0.163232	0.171379	0.290056	0.175293	0.19404	0.327653	0.180317	0.25607	0.18126	0.186652	0.247636	0.229745	0.17837	0.178654	0.17963	0.287856	0.144068	0.178741	0.195738	0.187742	0.315523	0.15773	0.186757
85f4a238-6add-4815-a64e-6216e11465fe	92cff9ea-4838-40cf-b541-bcb98c919c3f	590	28	28	2025-08-23T01:42:52.000429Z	0.241923	0.281302	0.270532	0.252608	0.439055	0.281203	0.381004	0.377539	0.341299	0.387638	0.220414	0.242612	0.245119	0.250722	0.323406	0.258014	0.254809	0.335971	0.345861	0.245011	0.374186	0.307479	0.304356	0.530384	0.256593	0.294807	0.514884	0.261957	0.405548	0.255022	0.255677	0.394384	0.355028	0.287114	0.265887	0.262458	0.498511	0.18696	0.254432	0.270368	0.272989	0.511642	0.223541	0.300969
d2ff00a7-cc5a-4ef9-9e68-a9478c74cc3e	92cff9ea-4838-40cf-b541-bcb98c919c3f	740	28	28	2025-08-23T01:43:08.000429Z	0.177587	0.197365	0.192228	0.182513	0.311391	0.199672	0.269699	0.250845	0.239542	0.268606	0.165135	0.176974	0.152085	0.151232	0.19059	0.15813	0.156921	0.218091	0.205991	0.141213	0.223665	0.170458	0.176408	0.322132	0.18417	0.201983	0.344918	0.184089	0.262266	0.183559	0.186907	0.256428	0.254953	0.195052	0.180719	0.1794	0.332185	0.144306	0.178435	0.187087	0.19129	0.335407	0.162442	0.200554
7eb08742-e3e9-4ca3-a9b9-83c87499f73c	92cff9ea-4838-40cf-b541-bcb98c919c3f	590	28	28	2025-08-23T02:02:52.000429Z	0.24108	0.301343	0.27304	0.265126	0.486277	0.302593	0.41442	0.398532	0.357906	0.419279	0.2285	0.238097	0.246021	0.259738	0.342017	0.262394	0.263161	0.35991	0.349243	0.251844	0.398627	0.322136	0.313455	0.574828	0.271298	0.307616	0.561965	0.273836	0.413154	0.257032	0.250813	0.40457	0.402795	0.271747	0.263553	0.263754	0.582885	0.183792	0.259959	0.270109	0.279138	0.561706	0.232152	0.338205
c6862492-6897-45e1-a843-662652a753c0	92cff9ea-4838-40cf-b541-bcb98c919c3f	740	28	28	2025-08-23T02:03:08.000429Z	0.178687	0.208119	0.193938	0.189147	0.338273	0.209981	0.291552	0.263106	0.251293	0.285433	0.170369	0.176644	0.151901	0.1568	0.199066	0.159823	0.160482	0.233479	0.207801	0.143803	0.236175	0.177338	0.180714	0.352124	0.193672	0.210077	0.377342	0.190384	0.267922	0.184954	0.185009	0.262946	0.291338	0.187454	0.179906	0.180539	0.37202	0.142877	0.180759	0.187028	0.195141	0.366748	0.166124	0.222032
37f833c8-eb0a-4901-bd7e-5c0928da67d3	92cff9ea-4838-40cf-b541-bcb98c919c3f	590	28	28	2025-08-23T02:22:52.000429Z	0.238532	0.315691	0.284012	0.279824	0.529528	0.308879	0.467821	0.400179	0.376002	0.44966	0.241468	0.234905	0.251985	0.267622	0.361987	0.266986	0.274032	0.390236	0.351848	0.2488	0.421138	0.337209	0.33368	0.643327	0.257528	0.320894	0.602758	0.287791	0.41957	0.256757	0.24341	0.416809	0.455701	0.273632	0.264621	0.266777	0.669487	0.180177	0.269876	0.267774	0.285851	0.594093	0.2427	0.332076
84c5abe8-1246-44da-b6f6-472e33e34c12	92cff9ea-4838-40cf-b541-bcb98c919c3f	740	28	28	2025-08-23T02:23:09.000429Z	0.177044	0.215538	0.199002	0.197415	0.364767	0.213446	0.323031	0.265997	0.262877	0.302175	0.177718	0.175258	0.155054	0.159034	0.209585	0.161605	0.165572	0.251604	0.208078	0.140942	0.251099	0.186546	0.18978	0.3841	0.186555	0.218076	0.399801	0.197694	0.27228	0.184821	0.179225	0.269378	0.327437	0.187712	0.180972	0.180599	0.414022	0.140688	0.185404	0.185837	0.199104	0.391268	0.171456	0.219398
9e7ced25-8712-4669-8485-bff02da819ff	92cff9ea-4838-40cf-b541-bcb98c919c3f	590	28	28	2025-08-23T02:42:52.000429Z	0.239202	0.323938	0.29898	0.295283	0.570259	0.323637	0.516949	0.40615	0.393819	0.485298	0.25406	0.235825	0.254289	0.271635	0.38125	0.266978	0.284905	0.484101	0.357658	0.260795	0.451929	0.352142	0.353975	0.69346	0.274511	0.336775	0.653665	0.304643	0.424693	0.256274	0.24688	0.437471	0.518089	0.273914	0.263386	0.256627	0.782731	0.175859	0.283164	0.264219	0.292419	0.64093	0.239035	0.328964
05fb87b1-f20e-4717-8dae-031276b3e41b	92cff9ea-4838-40cf-b541-bcb98c919c3f	740	28	28	2025-08-23T02:43:08.000429Z	0.177235	0.220572	0.205847	0.207191	0.385409	0.221844	0.350533	0.266811	0.2742	0.321927	0.183075	0.174818	0.156648	0.160911	0.222507	0.162382	0.171718	0.319841	0.210987	0.14856	0.273348	0.195551	0.201443	0.412109	0.195065	0.226242	0.43202	0.205455	0.276357	0.184581	0.179502	0.279761	0.372664	0.187508	0.180109	0.175723	0.483025	0.138424	0.192351	0.183968	0.203062	0.419381	0.169466	0.217484
75906576-3974-4177-ac06-974cbdfce68a	92cff9ea-4838-40cf-b541-bcb98c919c3f	590	28	28	2025-08-23T03:02:53.000429Z	0.236888	0.337916	0.320339	0.313083	0.624118	0.33928	0.572877	0.440712	0.413325	0.514087	0.268469	0.23821	0.255423	0.283948	0.40508	0.265638	0.296413	0.53168	0.369019	0.270735	0.489594	0.357343	0.377436	0.763119	0.264716	0.354957	0.685091	0.321374	0.430008	0.25528	0.257081	0.470612	0.591199	0.273528	0.262799	0.255618	0.859555	0.173136	0.298056	0.260591	0.298867	0.696162	0.242907	0.32714
4f517206-0767-46aa-b332-a71a5f309e7c	92cff9ea-4838-40cf-b541-bcb98c919c3f	740	28	28	2025-08-23T03:03:09.000429Z	0.175665	0.227842	0.216158	0.218501	0.416667	0.228929	0.378494	0.283275	0.286737	0.339737	0.188969	0.175797	0.157314	0.166915	0.23413	0.161158	0.177708	0.349993	0.215159	0.153895	0.298928	0.197944	0.213776	0.449591	0.191049	0.236841	0.452324	0.212977	0.280311	0.18387	0.183008	0.296151	0.420382	0.187494	0.179309	0.173517	0.531376	0.137056	0.199723	0.182141	0.20715	0.452253	0.17106	0.216188
e3a1711e-0729-4991-a52c-0ff0b876b71e	92cff9ea-4838-40cf-b541-bcb98c919c3f	590	28	28	2025-08-23T03:22:52.000429Z	0.235014	0.354042	0.337405	0.332056	0.675755	0.360385	0.638897	0.465916	0.437093	0.55005	0.286541	0.236811	0.259727	0.297274	0.422154	0.261595	0.306609	0.586971	0.378677	0.269606	0.525374	0.36076	0.398009	0.815567	0.265869	0.373645	0.722635	0.339059	0.436219	0.253126	0.263253	0.493209	0.639857	0.272457	0.261715	0.252226	0.924445	0.172002	0.313259	0.258304	0.306343	0.743452	0.245667	0.325499
6599ff42-74e6-49ae-a605-3fa909c9b965	92cff9ea-4838-40cf-b541-bcb98c919c3f	740	28	28	2025-08-23T03:23:08.000429Z	0.174413	0.236035	0.223266	0.230497	0.444056	0.239365	0.417971	0.298587	0.300594	0.359916	0.196152	0.174404	0.158512	0.171786	0.244651	0.159366	0.184862	0.381968	0.222004	0.152616	0.319892	0.201511	0.225981	0.476907	0.191519	0.24745	0.476168	0.221439	0.284458	0.182539	0.18573	0.310202	0.442212	0.186747	0.178723	0.172	0.567018	0.136201	0.207254	0.180621	0.211748	0.484135	0.171989	0.215349
6c832ef9-519e-4875-a7c4-e72dfd7b37bd	92cff9ea-4838-40cf-b541-bcb98c919c3f	590	28	28	2025-08-23T03:42:53.000429Z	0.235967	0.377047	0.369873	0.354519	0.722565	0.389614	0.69796	0.480793	0.459344	0.585527	0.299258	0.232866	0.258613	0.310671	0.442557	0.254997	0.323984	0.642441	0.394957	0.27909	0.553529	0.363469	0.423644	0.881694	0.260956	0.39392	0.767231	0.356182	0.44252	0.248711	0.280441	0.512224	0.689728	0.27002	0.260887	0.248209	0.981197	0.170998	0.33063	0.255972	0.314033	0.797683	0.246488	0.323661
829aaca2-624c-4bdd-b0cf-3338afe14ccd	92cff9ea-4838-40cf-b541-bcb98c919c3f	740	28	28	2025-08-23T03:43:09.000429Z	0.174028	0.247464	0.239913	0.2442	0.46559	0.255465	0.454553	0.307073	0.314937	0.379503	0.202877	0.17389	0.158171	0.178681	0.256759	0.154987	0.196339	0.413152	0.232911	0.157229	0.334768	0.201816	0.241406	0.513605	0.188698	0.259718	0.502975	0.22932	0.288661	0.179635	0.191954	0.323085	0.464811	0.185417	0.178374	0.170519	0.601699	0.135704	0.21587	0.179202	0.216118	0.520424	0.171845	0.214094
f4c1c37f-3925-4c73-9866-104820227f69	92cff9ea-4838-40cf-b541-bcb98c919c3f	590	28	28	2025-08-23T04:02:52.000429Z	0.236224	0.396595	0.372646	0.377743	0.775023	0.41239	0.761949	0.490521	0.488594	0.626718	0.308536	0.229722	0.256752	0.318333	0.460155	0.247724	0.344569	0.690368	0.412216	0.2882	0.589146	0.371817	0.452182	0.942038	0.261965	0.412747	0.812369	0.374068	0.449229	0.24291	0.31221	0.539092	0.733073	0.268565	0.262107	0.248511	1.03269	0.170972	0.345744	0.253364	0.324591	0.840898	0.247597	0.322064
a7edcbe8-292b-472a-a147-c38ef0d8c8c1	92cff9ea-4838-40cf-b541-bcb98c919c3f	740	28	28	2025-08-23T04:03:08.000429Z	0.173683	0.257679	0.243166	0.258753	0.493956	0.267158	0.495966	0.312695	0.333387	0.403927	0.207256	0.17342	0.156994	0.183046	0.266113	0.151473	0.209599	0.440139	0.244134	0.161515	0.353943	0.206818	0.25877	0.547941	0.18895	0.271604	0.528482	0.237661	0.29313	0.176523	0.2045	0.337353	0.482421	0.184111	0.178816	0.170651	0.63409	0.135514	0.224462	0.177892	0.222054	0.549459	0.173443	0.212833
6eda9de2-50be-476c-ad2b-5b0f69f5d9f5	92cff9ea-4838-40cf-b541-bcb98c919c3f	590	28	28	2025-08-23T04:22:52.000429Z	0.236541	0.417119	0.383911	0.40494	0.819134	0.434697	0.805192	0.49649	0.524178	0.666052	0.320242	0.227803	0.256227	0.330578	0.477298	0.243449	0.37307	0.725561	0.433914	0.296003	0.629924	0.381658	0.482132	1.00087	0.261899	0.436525	0.859401	0.390621	0.456385	0.239004	0.337637	0.575312	0.763896	0.264426	0.261184	0.248002	1.08331	0.1707	0.363463	0.250466	0.33532	0.894177	0.241089	0.320461
06e53406-fdf4-4987-bd1d-dbcb79e85484	92cff9ea-4838-40cf-b541-bcb98c919c3f	740	28	28	2025-08-23T04:23:08.000429Z	0.173826	0.26857	0.248219	0.275749	0.515917	0.279613	0.523424	0.314751	0.358408	0.427236	0.211869	0.170736	0.156829	0.188088	0.276235	0.14939	0.227879	0.459136	0.25506	0.163311	0.375129	0.213113	0.275494	0.574261	0.189082	0.286529	0.552302	0.245166	0.297498	0.174397	0.215311	0.352917	0.491	0.181971	0.177567	0.170063	0.66381	0.135287	0.23487	0.176087	0.227734	0.582644	0.169065	0.211861
f04ef1ad-8629-43ba-b6be-feb9b57a6edb	92cff9ea-4838-40cf-b541-bcb98c919c3f	590	28	28	2025-08-23T04:42:51.000429Z	0.235721	0.435554	0.405049	0.435482	0.851167	0.455185	0.851341	0.496205	0.565863	0.702107	0.338861	0.227843	0.257412	0.341502	0.494691	0.241088	0.408072	0.759027	0.454044	0.304656	0.671613	0.383373	0.513111	1.05441	0.261056	0.459012	0.911091	0.401814	0.463047	0.236879	0.349031	0.611521	0.787216	0.25953	0.25803	0.245146	1.13522	0.170766	0.375843	0.24797	0.329436	0.950942	0.240399	0.31909
b42174a1-3fde-448b-b802-1018b16b3f7b	92cff9ea-4838-40cf-b541-bcb98c919c3f	740	28	28	2025-08-23T04:43:07.000429Z	0.173102	0.278651	0.25897	0.29491	0.535785	0.29048	0.549897	0.313745	0.383763	0.447582	0.221436	0.171133	0.157289	0.194012	0.28459	0.147623	0.249927	0.474869	0.266402	0.168119	0.395085	0.215905	0.294953	0.608051	0.188298	0.299922	0.581424	0.25132	0.301734	0.173277	0.221873	0.37156	0.498574	0.180504	0.176513	0.1691	0.691287	0.135323	0.242497	0.175014	0.224773	0.614639	0.16827	0.210495
ace5310a-fe3c-461e-a115-ba8e323c1dbf	92cff9ea-4838-40cf-b541-bcb98c919c3f	590	28	28	2025-08-23T05:02:52.000429Z	0.233849	0.456418	0.426762	0.473696	0.896208	0.473127	0.895383	0.506384	0.600364	0.744367	0.352379	0.225372	0.257575	0.347703	0.510324	0.238606	0.447793	0.788987	0.471909	0.318099	0.716794	0.386422	0.545014	1.09871	0.261166	0.483667	0.952091	0.41958	0.469774	0.234775	0.368822	0.63617	0.810281	0.254763	0.253694	0.243552	1.17516	0.170258	0.388238	0.248287	0.291839	1.00423	0.242628	0.316245
53955d75-1db4-41be-b1a7-7c0c1086e4d9	92cff9ea-4838-40cf-b541-bcb98c919c3f	740	28	28	2025-08-23T05:03:08.000429Z	0.171904	0.289767	0.269857	0.318026	0.559342	0.301732	0.576359	0.319967	0.404987	0.47188	0.228229	0.168806	0.157806	0.197115	0.293949	0.146536	0.275818	0.490082	0.277426	0.174071	0.420062	0.221751	0.316858	0.637818	0.188047	0.316001	0.606677	0.259619	0.306168	0.172508	0.232704	0.384996	0.506712	0.17942	0.1754	0.168679	0.714124	0.135282	0.250746	0.174728	0.203854	0.64785	0.16857	0.209483
0994138e-a534-4dca-9f19-cc3070c7ab3b	92cff9ea-4838-40cf-b541-bcb98c919c3f	590	28	28	2025-08-23T05:22:53.000429Z	0.231996	0.480455	0.437871	0.520976	0.913037	0.492414	0.943026	0.515889	0.642849	0.789401	0.36328	0.226598	0.25825	0.360434	0.528918	0.23909	0.500768	0.823937	0.494896	0.324329	0.76743	0.398474	0.584751	1.16589	0.261041	0.514985	0.989275	0.430999	0.478052	0.234408	0.385616	0.678866	0.839112	0.254539	0.253858	0.246119	1.20588	0.170688	0.402684	0.249001	0.28727	1.05597	0.240959	0.314844
c9d8e9f8-e459-4d64-ad41-584dc61d2d64	92cff9ea-4838-40cf-b541-bcb98c919c3f	740	28	28	2025-08-23T05:23:09.000429Z	0.170887	0.303259	0.275467	0.346386	0.569624	0.314451	0.604594	0.323732	0.430586	0.495263	0.234087	0.170056	0.157778	0.202109	0.304703	0.146316	0.309625	0.501864	0.288326	0.176147	0.443376	0.226042	0.339528	0.668276	0.188098	0.334339	0.628936	0.265423	0.311302	0.172256	0.242613	0.406102	0.521473	0.17847	0.174483	0.169024	0.732513	0.135489	0.262412	0.175238	0.200414	0.678143	0.168088	0.208504
6f775fa2-5f41-49cc-a523-9b828527ab87	92cff9ea-4838-40cf-b541-bcb98c919c3f	590	28	28	2025-08-23T05:42:52.000429Z	0.230069	0.499444	0.454809	0.570831	0.932169	0.512492	0.987735	0.528295	0.689246	0.822735	0.378344	0.221716	0.259538	0.371997	0.546235	0.237578	0.553827	0.857315	0.511689	0.332018	0.813921	0.398537	0.615026	1.20679	0.260258	0.545445	1.02351	0.44756	0.484985	0.233919	0.392276	0.713004	0.861019	0.252528	0.250917	0.245834	1.24246	0.170589	0.416745	0.248846	0.286856	1.0961	0.245349	0.312815
b6c58d3e-72a4-4ea0-8f18-2f204c6d9d56	92cff9ea-4838-40cf-b541-bcb98c919c3f	740	28	28	2025-08-23T05:43:08.000429Z	0.169705	0.312614	0.283743	0.374578	0.591362	0.326961	0.629587	0.330997	0.458452	0.51391	0.241755	0.166359	0.158352	0.207216	0.314377	0.145947	0.340232	0.516496	0.296021	0.179004	0.468019	0.229835	0.358404	0.695625	0.187748	0.350723	0.649354	0.273169	0.31538	0.171703	0.246425	0.421447	0.528811	0.177637	0.173569	0.169597	0.749516	0.135359	0.271451	0.174538	0.199776	0.702956	0.169045	0.207551
25d56b20-d716-4720-8c26-ba181e502d79	92cff9ea-4838-40cf-b541-bcb98c919c3f	590	28	28	2025-08-23T06:02:52.000429Z	0.22659	0.522434	0.469194	0.62196	0.964808	0.536722	1.02928	0.537695	0.737908	0.855069	0.391784	0.219393	0.258766	0.383766	0.564372	0.236363	0.606451	0.88984	0.5264	0.342011	0.85553	0.407145	0.643836	1.25477	0.258557	0.580322	1.05221	0.462045	0.492159	0.232944	0.403204	0.748603	0.883016	0.248893	0.246829	0.244142	1.26677	0.1706	0.434324	0.246356	0.286238	1.12369	0.245167	0.311472
333c21c3-a816-4745-9ae7-5162417d7d05	92cff9ea-4838-40cf-b541-bcb98c919c3f	740	28	28	2025-08-23T06:03:09.000429Z	0.168113	0.324374	0.292631	0.405264	0.61429	0.342011	0.650194	0.337406	0.486039	0.531438	0.249401	0.164884	0.158088	0.212783	0.324795	0.145205	0.372307	0.533985	0.303328	0.183575	0.488402	0.234408	0.373987	0.708124	0.18719	0.370267	0.666323	0.280376	0.320093	0.171323	0.251652	0.441776	0.537797	0.176088	0.171473	0.16936	0.75949	0.13537	0.283949	0.173464	0.199632	0.718528	0.169129	0.206807
0b9eba9e-afbb-43a9-8976-1b0b93dff25d	92cff9ea-4838-40cf-b541-bcb98c919c3f	590	28	28	2025-08-23T06:22:53.000429Z	0.226167	0.542201	0.488012	0.668611	1.00268	0.569503	1.07939	0.555824	0.795776	0.891845	0.405147	0.220394	0.257227	0.400615	0.584098	0.235606	0.659774	0.925402	0.54755	0.355196	0.904586	0.413368	0.681681	1.30336	0.257989	0.615666	1.08758	0.47845	0.50011	0.233263	0.419782	0.787632	0.909711	0.250336	0.247514	0.247795	1.29184	0.170817	0.455955	0.246356	0.286489	1.15505	0.245676	0.31134
798ce0ac-b1b9-469a-aaff-b10f7a15a29d	92cff9ea-4838-40cf-b541-bcb98c919c3f	740	28	28	2025-08-23T06:23:09.000429Z	0.167236	0.335927	0.301637	0.434334	0.63732	0.361137	0.673367	0.346464	0.518039	0.549432	0.257255	0.163845	0.157063	0.220294	0.336096	0.144702	0.402258	0.552144	0.311819	0.188665	0.51212	0.238929	0.394282	0.731462	0.186085	0.390878	0.685741	0.28811	0.324715	0.17135	0.260127	0.460316	0.546839	0.175899	0.170988	0.170404	0.775746	0.135387	0.297637	0.173064	0.199218	0.732674	0.169027	0.206338
a0eb403e-6693-4dec-b7ea-3fbd58bd6983	92cff9ea-4838-40cf-b541-bcb98c919c3f	590	28	28	2025-08-23T06:42:52.000429Z	0.223283	0.562576	0.501964	0.707952	1.01905	0.604756	1.12408	0.574346	0.847125	0.921513	0.421626	0.215935	0.254269	0.416526	0.603799	0.234976	0.707679	0.964326	0.565895	0.362308	0.952216	0.413897	0.711236	1.32782	0.256186	0.650311	1.10614	0.498383	0.506811	0.232602	0.437018	0.815133	0.931074	0.248104	0.244687	0.246947	1.29907	0.170491	0.481295	0.245163	0.286266	1.18332	0.247225	0.310596
af4c6ab5-e216-4702-8311-959cc40ea7d3	92cff9ea-4838-40cf-b541-bcb98c919c3f	740	28	28	2025-08-23T06:43:08.000429Z	0.165168	0.345898	0.309379	0.456291	0.645866	0.381164	0.697871	0.357428	0.546334	0.56744	0.264097	0.161114	0.155429	0.228029	0.346298	0.144086	0.427982	0.571407	0.321992	0.192124	0.537742	0.239179	0.413073	0.750253	0.184105	0.41012	0.696044	0.298153	0.328751	0.170987	0.269832	0.474071	0.5551	0.175556	0.170087	0.170259	0.778649	0.135121	0.311961	0.17236	0.198777	0.743221	0.168927	0.205909
3be6511b-20f7-4cc7-b201-5c8dfd6d4f8a	92cff9ea-4838-40cf-b541-bcb98c919c3f	590	28	28	2025-08-23T07:02:52.000429Z	0.218907	0.58387	0.49398	0.738098	1.03869	0.648402	1.15095	0.586538	0.912892	0.950584	0.432435	0.211056	0.257454	0.429729	0.620879	0.234339	0.749208	1.00198	0.586333	0.369266	0.991562	0.418598	0.742404	1.35354	0.253257	0.684509	1.11817	0.512077	0.513707	0.232112	0.460629	0.843976	0.95065	0.246932	0.24257	0.247811	1.30313	0.170474	0.511335	0.243968	0.285342	1.22064	0.244875	0.310501
d2ee1d18-d1e9-4310-9933-29a4cc105963	92cff9ea-4838-40cf-b541-bcb98c919c3f	740	28	28	2025-08-23T07:03:08.000429Z	0.163471	0.357498	0.307479	0.473147	0.655569	0.404709	0.709498	0.363999	0.580931	0.58424	0.271776	0.161303	0.1564	0.235457	0.356098	0.143251	0.449178	0.588329	0.331998	0.197759	0.557858	0.240451	0.428997	0.760034	0.182687	0.426637	0.701124	0.304692	0.332905	0.170734	0.280803	0.485922	0.56283	0.174893	0.169036	0.170818	0.778732	0.135199	0.329581	0.171781	0.197724	0.755514	0.167737	0.205675
b9e2503f-1412-48c8-9f22-8db95d2a4013	92cff9ea-4838-40cf-b541-bcb98c919c3f	590	28	28	2025-08-23T07:22:52.000429Z	0.21619	0.60511	0.495599	0.766867	1.06083	0.687256	1.18159	0.602505	0.961079	0.985119	0.440446	0.20798	0.254756	0.444642	0.640408	0.233751	0.78717	1.03744	0.604262	0.377213	1.01805	0.431621	0.774506	1.37134	0.250817	0.721881	1.13372	0.5306	0.52024	0.231967	0.473812	0.861269	0.966575	0.247184	0.241557	0.249794	1.31655	0.170925	0.541555	0.242871	0.284822	1.25469	0.24316	0.310869
7011c1ae-40df-40ba-8a04-9f90169456b3	92cff9ea-4838-40cf-b541-bcb98c919c3f	740	28	28	2025-08-23T07:23:08.000429Z	0.161753	0.368142	0.307929	0.488106	0.664961	0.427152	0.722143	0.372869	0.606835	0.598674	0.274161	0.158409	0.154915	0.242544	0.367519	0.143035	0.468623	0.603641	0.341234	0.200888	0.574007	0.249879	0.444814	0.763484	0.181666	0.444265	0.706561	0.313	0.337013	0.170443	0.290061	0.49502	0.568499	0.17483	0.168166	0.17188	0.778471	0.135321	0.347337	0.171061	0.197242	0.772076	0.166999	0.2056
d1b45f23-643c-4b68-b25d-344ca39ff788	92cff9ea-4838-40cf-b541-bcb98c919c3f	590	28	28	2025-08-23T07:42:52.000429Z	0.213038	0.62632	0.512425	0.79962	1.08006	0.722575	1.20333	0.617698	1.01582	1.01426	0.441912	0.205863	0.257414	0.460862	0.659157	0.233193	0.820925	1.07698	0.617419	0.378602	1.04015	0.43658	0.812429	1.39411	0.248844	0.755639	1.15554	0.544725	0.52726	0.230564	0.466974	0.884322	0.981532	0.247692	0.241684	0.252807	1.33117	0.170888	0.577205	0.240259	0.284568	1.28904	0.242784	0.310322
0f29e800-d985-41e9-b8cb-6ce31940ab05	92cff9ea-4838-40cf-b541-bcb98c919c3f	740	28	28	2025-08-23T07:43:08.000429Z	0.15979	0.379658	0.316289	0.505311	0.675687	0.446432	0.731299	0.380403	0.633711	0.61217	0.277014	0.157034	0.156016	0.250425	0.378834	0.142647	0.488283	0.62001	0.346979	0.203961	0.584009	0.252333	0.46568	0.780907	0.179957	0.461267	0.716083	0.321058	0.341371	0.169841	0.287483	0.505776	0.573411	0.175143	0.168384	0.172651	0.77895	0.135441	0.36748	0.169695	0.196977	0.786742	0.166403	0.20512
1cb1e9dc-1f96-4e53-8d8e-49d84c91ac09	92cff9ea-4838-40cf-b541-bcb98c919c3f	590	28	28	2025-08-23T08:02:52.000429Z	0.210552	0.649896	0.529622	0.842661	1.08593	0.75124	1.22415	0.630629	1.06405	1.04013	0.460392	0.203273	0.254105	0.477614	0.682085	0.234024	0.853428	1.11847	0.628245	0.385784	1.05317	0.441163	0.851024	1.4278	0.246513	0.786147	1.15795	0.555546	0.534066	0.227475	0.471137	0.904954	0.99775	0.247689	0.241128	0.254531	1.36754	0.170842	0.612484	0.238644	0.28389	1.29774	0.247904	0.309585
b7675e77-d0f9-44be-bbdd-e2157568520b	92cff9ea-4838-40cf-b541-bcb98c919c3f	740	28	28	2025-08-23T08:03:08.000429Z	0.158883	0.39209	0.32479	0.526605	0.678007	0.4639	0.739198	0.387913	0.654344	0.624084	0.286463	0.155896	0.153713	0.259572	0.392074	0.143384	0.508091	0.636193	0.35181	0.205212	0.590919	0.256447	0.4839	0.781019	0.179385	0.477198	0.715503	0.327505	0.346008	0.16833	0.289921	0.514774	0.579772	0.174997	0.167777	0.173535	0.796814	0.135523	0.388587	0.169074	0.19646	0.787846	0.16822	0.204638
bc7aebe0-1172-4813-92f6-06c1d44d1e19	92cff9ea-4838-40cf-b541-bcb98c919c3f	590	28	28	2025-08-23T08:22:52.000429Z	0.20862	0.670482	0.542643	0.882277	1.095	0.785496	1.25615	0.642451	1.12941	1.06951	0.479672	0.203199	0.253081	0.493479	0.707632	0.235882	0.884358	1.15542	0.630772	0.392304	1.05902	0.440979	0.887286	1.44406	0.244907	0.815986	1.15603	0.569795	0.540469	0.225879	0.48123	0.906949	1.00951	0.247302	0.239964	0.255507	1.3716	0.171121	0.644727	0.238259	0.282979	1.31084	0.245	0.309224
416e4c8a-a4ff-4db2-bd0a-762097235c5b	92cff9ea-4838-40cf-b541-bcb98c919c3f	740	28	28	2025-08-23T08:23:08.000429Z	0.15787	0.402431	0.331772	0.545862	0.681503	0.481477	0.751102	0.393432	0.689017	0.646314	0.296882	0.15547	0.153215	0.267889	0.403992	0.144097	0.524014	0.652619	0.353858	0.207534	0.593589	0.256186	0.502762	0.791942	0.178535	0.491779	0.712792	0.334986	0.349755	0.167689	0.294752	0.515692	0.58383	0.174977	0.16726	0.173483	0.799879	0.135713	0.406081	0.168877	0.195961	0.789691	0.167091	0.204374
294ea84a-4cf1-4821-8d9b-aa65cfe0eef5	92cff9ea-4838-40cf-b541-bcb98c919c3f	590	28	28	2025-08-23T08:42:52.000429Z	0.207483	0.692958	0.551541	0.91667	1.10647	0.821708	1.28356	0.659203	1.18172	1.09318	0.491918	0.201608	0.252328	0.505685	0.734059	0.234365	0.92443	1.18397	0.648678	0.403671	1.07481	0.44415	0.923583	1.46484	0.245223	0.845947	1.16269	0.581517	0.5468	0.225313	0.493039	0.914212	1.02399	0.247994	0.239451	0.256487	1.37957	0.171385	0.676523	0.238431	0.282043	1.33198	0.247001	0.308298
1d6a59c4-310e-45fb-b626-509f8296382f	92cff9ea-4838-40cf-b541-bcb98c919c3f	740	28	28	2025-08-23T08:43:08.000429Z	0.156521	0.413195	0.337337	0.562176	0.685382	0.500797	0.763998	0.402256	0.708435	0.652869	0.303105	0.153324	0.152345	0.274881	0.41788	0.143236	0.543827	0.666551	0.363256	0.214255	0.601487	0.259121	0.522182	0.803072	0.177594	0.506383	0.71371	0.341602	0.353632	0.167188	0.300579	0.518738	0.588161	0.175437	0.166973	0.172824	0.796531	0.135809	0.424578	0.168629	0.195299	0.796416	0.167544	0.203638
8b28ec5d-e30c-4ca0-abb2-897cf64d687b	92cff9ea-4838-40cf-b541-bcb98c919c3f	590	28	28	2025-08-23T09:02:52.000429Z	0.205645	0.716474	0.564203	0.944898	1.13003	0.846885	1.31071	0.675546	1.2241	1.12092	0.501321	0.197717	0.249731	0.520508	0.766441	0.231786	0.9639	1.21486	0.648336	0.412315	1.09481	0.452452	0.961106	1.47171	0.243428	0.875302	1.17366	0.594758	0.553031	0.225014	0.509501	0.93883	1.04156	0.249105	0.240066	0.257223	1.38989	0.171631	0.706156	0.238486	0.281639	1.35574	0.248938	0.307855
9bd156a4-8b04-4c13-a23c-97983f27aff0	92cff9ea-4838-40cf-b541-bcb98c919c3f	740	28	28	2025-08-23T09:03:08.000429Z	0.155906	0.425584	0.34458	0.576379	0.698644	0.515724	0.771339	0.409102	0.735235	0.665773	0.309829	0.153571	0.151404	0.283792	0.433526	0.141452	0.563048	0.680214	0.362402	0.218599	0.609898	0.261344	0.541663	0.807935	0.1771	0.519742	0.715159	0.349063	0.357624	0.167068	0.307858	0.527519	0.59274	0.175638	0.166762	0.172577	0.792086	0.135969	0.441821	0.168881	0.194911	0.802107	0.167195	0.203234
b24a4bb9-9387-4f53-beff-ced3d3b19ded	92cff9ea-4838-40cf-b541-bcb98c919c3f	590	28	28	2025-08-23T09:22:53.000429Z	0.204399	0.738868	0.58452	0.972169	1.14019	0.870041	1.33155	0.687287	1.24867	1.1433	0.50256	0.198757	0.248366	0.532351	0.796353	0.231381	0.999987	1.24169	0.631629	0.428222	1.09728	0.449409	0.996446	1.48486	0.242593	0.903135	1.20198	0.60633	0.558938	0.225122	0.521848	0.958417	1.04885	0.24845	0.238848	0.255232	1.40061	0.171745	0.739598	0.23983	0.280959	1.37402	0.249367	0.30713
834cf4b2-022e-4f21-a7ff-cbf9307855da	92cff9ea-4838-40cf-b541-bcb98c919c3f	740	28	28	2025-08-23T09:23:09.000429Z	0.154974	0.43804	0.354709	0.587887	0.701285	0.529357	0.778394	0.414337	0.746764	0.680591	0.31073	0.152911	0.150883	0.289674	0.448268	0.141699	0.579767	0.692262	0.354197	0.22581	0.611683	0.26229	0.558625	0.805821	0.176311	0.533776	0.726127	0.355601	0.361539	0.167032	0.3145	0.536094	0.595429	0.1758	0.166159	0.170684	0.796521	0.136059	0.460451	0.169203	0.194107	0.806215	0.167777	0.202683
58e2dbea-662f-4ed2-b023-eadb66010a76	92cff9ea-4838-40cf-b541-bcb98c919c3f	590	28	28	2025-08-23T09:42:51.000429Z	0.203221	0.764278	0.594363	1.00098	1.14149	0.887814	1.36726	0.693755	1.28967	1.16708	0.50117	0.195961	0.246352	0.548239	0.824513	0.232081	1.03838	1.26874	0.59553	0.439536	1.11683	0.457398	1.03006	1.48473	0.241593	0.932255	1.2361	0.62121	0.565391	0.225247	0.536336	0.979979	1.06241	0.248978	0.238549	0.253779	1.40892	0.172229	0.77346	0.240318	0.280367	1.38875	0.244356	0.306461
57cc6b3a-6147-489d-8cfd-a08fa7a40672	92cff9ea-4838-40cf-b541-bcb98c919c3f	740	28	28	2025-08-23T09:43:08.000429Z	0.154207	0.450741	0.359111	0.601481	0.698246	0.539754	0.790834	0.418437	0.762123	0.693616	0.308503	0.152334	0.149709	0.297209	0.458245	0.141462	0.596675	0.703496	0.334391	0.231694	0.622532	0.267987	0.57581	0.808195	0.175774	0.547156	0.74082	0.363386	0.365129	0.166954	0.322498	0.54557	0.599436	0.176287	0.166421	0.170125	0.795872	0.13614	0.477832	0.169172	0.193542	0.80777	0.165079	0.202181
54a92e72-efb9-4df5-ba8b-fee061e4edf8	92cff9ea-4838-40cf-b541-bcb98c919c3f	590	28	28	2025-08-23T10:02:52.000429Z	0.201515	0.787761	0.6045	1.04183	1.14876	0.904527	1.38261	0.701173	1.31934	1.22644	0.515532	0.19506	0.247191	0.559943	0.849784	0.232032	1.07746	1.29872	0.576521	0.448476	1.12317	0.468071	1.0608	1.50088	0.240194	0.960006	1.25287	0.631226	0.57091	0.225096	0.550219	1.00465	1.07114	0.249059	0.236935	0.252281	1.41804	0.172343	0.803806	0.240346	0.278943	1.4081	0.246455	0.30541
2768d0b0-38d0-4cd9-84b5-be5e45351ec8	92cff9ea-4838-40cf-b541-bcb98c919c3f	740	28	28	2025-08-23T10:03:09.000429Z	0.153524	0.463894	0.366863	0.622447	0.698453	0.550206	0.794893	0.423827	0.770548	0.715465	0.314633	0.150867	0.150231	0.304577	0.471661	0.141735	0.612853	0.715239	0.323113	0.234619	0.624242	0.275455	0.588225	0.801389	0.175618	0.55957	0.746946	0.369478	0.368813	0.166835	0.329636	0.554361	0.602105	0.175691	0.165904	0.169177	0.798004	0.136337	0.495186	0.16921	0.192941	0.812576	0.165541	0.20165
3f8465d0-01d9-4cc7-b5b1-a34e18717739	92cff9ea-4838-40cf-b541-bcb98c919c3f	590	28	28	2025-08-23T10:22:52.000429Z	0.201194	0.807542	0.615373	1.0584	1.1688	0.92012	1.39799	0.716797	1.33822	1.21301	0.533014	0.196116	0.250226	0.571843	0.883148	0.230955	1.11684	1.31961	0.587235	0.459574	1.1305	0.473779	1.09543	1.51708	0.240397	0.989726	1.2653	0.645989	0.576595	0.225294	0.563517	1.01558	1.08025	0.250829	0.235994	0.253762	1.43495	0.172759	0.839805	0.240997	0.278618	1.42298	0.246023	0.305649
34fe13ea-a712-47d2-8f44-8178d61ac6cb	92cff9ea-4838-40cf-b541-bcb98c919c3f	740	28	28	2025-08-23T10:23:08.000429Z	0.153112	0.474366	0.373285	0.630074	0.706632	0.559956	0.79722	0.430641	0.776549	0.713829	0.32314	0.151033	0.151246	0.311107	0.486312	0.140941	0.62697	0.724506	0.330011	0.238488	0.625526	0.27728	0.603956	0.807798	0.175232	0.572843	0.750084	0.377004	0.372583	0.166696	0.337058	0.55917	0.605226	0.176244	0.164552	0.167166	0.804127	0.13646	0.513136	0.169194	0.192469	0.814424	0.165403	0.201331
61757a60-ce06-44fa-920e-3a4f6d32e8c9	92cff9ea-4838-40cf-b541-bcb98c919c3f	590	28	28	2025-08-23T10:42:50.000429Z	0.200486	0.825093	0.633212	1.08235	1.1998	0.935179	1.40779	0.729144	1.37621	1.26864	0.548138	0.193865	0.249273	0.579563	0.911413	0.231778	1.15655	1.354	0.590536	0.460963	1.13674	0.482879	1.12123	1.52132	0.24025	1.01909	1.27758	0.655237	0.582579	0.225257	0.575717	1.02272	1.08895	0.251473	0.235969	0.251056	1.45378	0.173387	0.874587	0.241792	0.278441	1.43748	0.246783	0.305559
6ef5ac43-6094-4199-8434-1f42c4ec6ab1	92cff9ea-4838-40cf-b541-bcb98c919c3f	740	28	28	2025-08-23T10:43:06.000429Z	0.152481	0.485236	0.382966	0.643737	0.721562	0.569271	0.796797	0.436708	0.788554	0.735182	0.332609	0.150323	0.151506	0.315578	0.498307	0.140651	0.643494	0.735362	0.330915	0.240015	0.624797	0.281652	0.617664	0.80859	0.174693	0.586251	0.753176	0.383003	0.376075	0.166608	0.344418	0.56063	0.606783	0.176565	0.164877	0.165941	0.807733	0.136922	0.531811	0.169358	0.192297	0.816951	0.165326	0.20096
930f15d1-ebb0-45a2-9510-c507ea61e98b	92cff9ea-4838-40cf-b541-bcb98c919c3f	590	28	28	2025-08-23T11:02:52.000429Z	0.200721	0.843428	0.658956	1.10051	1.23298	0.952791	1.41725	0.743002	1.39487	1.26344	0.564911	0.192863	0.251841	0.583792	0.932664	0.231831	1.19358	1.38159	0.613176	0.465105	1.13527	0.483786	1.14671	1.53092	0.240071	1.04824	1.28917	0.670354	0.58774	0.224801	0.586646	1.01234	1.09458	0.251604	0.237147	0.249488	1.47237	0.173831	0.912988	0.241691	0.278117	1.44579	0.246424	0.304596
7d706356-250a-4ffe-824c-ac2803355ee9	92cff9ea-4838-40cf-b541-bcb98c919c3f	740	28	28	2025-08-23T11:03:08.000429Z	0.1527	0.495503	0.396351	0.653534	0.737746	0.579063	0.79694	0.443664	0.794975	0.731075	0.341013	0.149282	0.153102	0.318146	0.509286	0.14072	0.658151	0.744348	0.343598	0.241792	0.619498	0.283173	0.630968	0.808305	0.174862	0.600352	0.755759	0.391404	0.379543	0.166338	0.351088	0.554065	0.608582	0.176543	0.165404	0.164564	0.812192	0.13725	0.551561	0.169185	0.19198	0.816341	0.165096	0.200318
9c4bdc83-11c9-46d1-b9a1-123dd6664387	92cff9ea-4838-40cf-b541-bcb98c919c3f	590	28	28	2025-08-23T11:22:52.000429Z	0.199391	0.864152	0.65552	1.11968	1.25691	0.973156	1.43152	0.758518	1.41999	1.26617	0.575057	0.193659	0.253262	0.596424	0.960886	0.233925	1.22149	1.40804	0.629487	0.467522	1.13614	0.489669	1.16726	1.53875	0.239825	1.07392	1.30237	0.684032	0.593155	0.224421	0.595955	1.01324	1.09674	0.251291	0.236624	0.247222	1.48619	0.174397	0.950798	0.242172	0.277633	1.45884	0.243204	0.304046
cdd08a0c-6b02-48a1-b1f1-e705a53d5fd9	92cff9ea-4838-40cf-b541-bcb98c919c3f	740	28	28	2025-08-23T11:23:08.000429Z	0.151772	0.505165	0.394575	0.659752	0.749957	0.588719	0.799269	0.450236	0.800109	0.737752	0.347193	0.149441	0.153558	0.324825	0.52147	0.141575	0.669987	0.754331	0.354277	0.243243	0.618262	0.288281	0.642374	0.808383	0.174485	0.61304	0.759119	0.399134	0.382729	0.165788	0.355992	0.552959	0.608453	0.1767	0.165384	0.163001	0.815395	0.137433	0.569881	0.169085	0.191373	0.818244	0.163376	0.199751
53b44dd9-923c-4ee9-99a6-398fabb17027	92cff9ea-4838-40cf-b541-bcb98c919c3f	590	28	28	2025-08-23T11:42:52.000429Z	0.198452	0.884869	0.67288	1.13914	1.2492	0.994529	1.45163	0.771673	1.44187	1.32172	0.584121	0.191531	0.25376	0.610809	0.983808	0.23395	1.2475	1.41873	0.654539	0.467433	1.15214	0.485657	1.18436	1.53713	0.239281	1.0996	1.31246	0.694163	0.597694	0.223774	0.605491	1.01763	1.10133	0.251314	0.236342	0.243754	1.48978	0.174837	0.987021	0.242062	0.277271	1.47199	0.244211	0.304385
095c3825-932a-483f-83bc-1f8f357f780b	92cff9ea-4838-40cf-b541-bcb98c919c3f	740	28	28	2025-08-23T11:43:08.000429Z	0.151256	0.51572	0.404578	0.663824	0.746172	0.600412	0.80457	0.458419	0.807467	0.75621	0.351339	0.147991	0.1539	0.331842	0.531913	0.141757	0.680484	0.756325	0.369502	0.243725	0.626708	0.288918	0.651014	0.804582	0.174152	0.625352	0.760491	0.404497	0.385514	0.164948	0.361504	0.552921	0.609532	0.176681	0.165327	0.161805	0.813755	0.137594	0.588935	0.168773	0.190657	0.819643	0.163942	0.199625
fb1c2d4c-4451-4ec5-827c-5dfe5bd73649	92cff9ea-4838-40cf-b541-bcb98c919c3f	590	28	28	2025-08-23T12:02:53.000429Z	0.198259	0.902336	0.691051	1.16348	1.22795	1.01788	1.46525	0.776411	1.46604	1.29998	0.593294	0.19034	0.254882	0.625042	1.00436	0.233853	1.26714	1.4349	0.665704	0.468926	1.18143	0.480903	1.20583	1.54066	0.238674	1.12413	1.32131	0.697426	0.602496	0.223115	0.613585	1.01293	1.1049	0.251049	0.235637	0.241363	1.49278	0.175235	1.02344	0.241843	0.276492	1.47996	0.244321	0.304564
cb8935cc-db1b-44fd-87b6-1b58f6fa06c9	92cff9ea-4838-40cf-b541-bcb98c919c3f	740	28	28	2025-08-23T12:03:09.000429Z	0.151121	0.526448	0.414572	0.669983	0.735384	0.612841	0.808165	0.460738	0.814764	0.755579	0.356705	0.147511	0.154463	0.339551	0.541924	0.141965	0.689243	0.760128	0.376222	0.242548	0.642829	0.291245	0.660248	0.802746	0.173885	0.63764	0.761945	0.408625	0.388855	0.165049	0.366582	0.549482	0.610738	0.176474	0.164886	0.160612	0.810651	0.137857	0.609153	0.168721	0.190475	0.81852	0.163706	0.199599
3179c349-391b-4e28-b279-219d7ac760b2	92cff9ea-4838-40cf-b541-bcb98c919c3f	590	28	28	2025-08-23T12:22:53.000429Z	0.197453	0.920804	0.719747	1.18617	1.20599	1.0399	1.47375	0.793942	1.50566	1.29443	0.603526	0.190238	0.256729	0.640294	1.02615	0.233284	1.28812	1.4431	0.679812	0.472638	1.21534	0.481794	1.23402	1.55162	0.239134	1.15025	1.33196	0.707256	0.607877	0.224121	0.624282	1.01538	1.11128	0.253783	0.23875	0.243626	1.50143	0.175873	1.06218	0.242393	0.276557	1.48732	0.247916	0.305181
26f29387-8748-4da4-a380-c8cd912d6453	92cff9ea-4838-40cf-b541-bcb98c919c3f	740	28	28	2025-08-23T12:23:09.000429Z	0.150735	0.537165	0.430434	0.677501	0.720439	0.622624	0.811201	0.468178	0.829296	0.749883	0.361791	0.147312	0.155553	0.347696	0.55146	0.142125	0.697173	0.760539	0.384099	0.243986	0.660275	0.290136	0.668384	0.801607	0.174172	0.65016	0.763996	0.414474	0.392322	0.165485	0.373076	0.546367	0.613273	0.177306	0.16543	0.161355	0.812403	0.138312	0.625587	0.168807	0.190415	0.818847	0.164934	0.199578
e42450aa-a162-4a70-af46-b18668d77b6f	92cff9ea-4838-40cf-b541-bcb98c919c3f	590	28	28	2025-08-23T12:42:52.000429Z	0.19619	0.93699	0.698998	1.20549	1.19082	1.05958	1.48053	0.794038	1.5112	1.32138	0.61384	0.188857	0.258334	0.654813	1.04444	0.233672	1.3133	1.44024	0.690167	0.47191	1.24028	0.483564	1.2475	1.54351	0.238524	1.17373	1.33997	0.720412	0.613101	0.224309	0.630338	1.03194	1.1133	0.252474	0.23563	0.238639	1.5117	0.17643	1.09796	0.243246	0.276401	1.49684	0.245444	0.304978
488abe17-2670-4d82-a09d-cc854509bf28	92cff9ea-4838-40cf-b541-bcb98c919c3f	740	28	28	2025-08-23T12:43:08.000429Z	0.149898	0.546545	0.420004	0.681336	0.709188	0.631468	0.81133	0.468907	0.82659	0.755187	0.368309	0.146572	0.156268	0.355225	0.559807	0.142098	0.702789	0.756292	0.389104	0.245131	0.674399	0.295809	0.675413	0.795395	0.174048	0.661662	0.764639	0.421929	0.395398	0.165132	0.377143	0.551042	0.61355	0.177169	0.164799	0.159872	0.813915	0.138715	0.642188	0.169062	0.18988	0.819016	0.163219	0.199331
bf25c0e0-2f46-4dfa-bb22-a881b88601d2	92cff9ea-4838-40cf-b541-bcb98c919c3f	590	28	28	2025-08-23T13:02:52.000429Z	0.19651	0.941402	0.718062	1.22256	1.1871	1.07939	1.48588	0.816441	1.53803	1.31537	0.625567	0.188888	0.259903	0.672043	1.06304	0.234144	1.32699	1.44743	0.704234	0.477195	1.27401	0.480598	1.27461	1.55791	0.238639	1.19931	1.34984	0.728673	0.617428	0.224073	0.639314	1.05422	1.12052	0.254117	0.236429	0.241142	1.53097	0.176792	1.12715	0.24364	0.275315	1.50666	0.245504	0.305022
3a9cca99-9bed-4a49-a626-3b4c8ccfcfaa	92cff9ea-4838-40cf-b541-bcb98c919c3f	740	28	28	2025-08-23T13:03:08.000429Z	0.150088	0.554777	0.4303	0.685953	0.703997	0.640324	0.811701	0.478666	0.837085	0.757636	0.37479	0.146588	0.156607	0.364404	0.568107	0.141949	0.709856	0.757379	0.396828	0.246745	0.690363	0.292923	0.68693	0.80166	0.174045	0.673519	0.765304	0.427692	0.398584	0.165319	0.382083	0.557454	0.615566	0.177567	0.164758	0.160014	0.819617	0.138892	0.6562	0.1694	0.18949	0.820689	0.163284	0.199267
966f9f85-a7c4-4bb7-97a1-20faed850a85	92cff9ea-4838-40cf-b541-bcb98c919c3f	590	28	28	2025-08-23T13:22:52.000429Z	0.195527	0.9505	0.744397	1.24046	1.18965	1.09744	1.48989	0.814031	1.5691	1.32702	0.627688	0.18792	0.260982	0.691174	1.07965	0.233421	1.34868	1.44772	0.715254	0.475608	1.30133	0.471542	1.28831	1.55502	0.238923	1.22337	1.35793	0.734552	0.621729	0.224926	0.643712	1.06298	1.12239	0.254603	0.234189	0.235162	1.55195	0.177249	1.15618	0.244144	0.274956	1.51388	0.250824	0.304711
bef757ba-f511-437c-80ae-a76dc9a61077	92cff9ea-4838-40cf-b541-bcb98c919c3f	740	28	28	2025-08-23T13:23:08.000429Z	0.149182	0.563335	0.445308	0.689859	0.703071	0.647451	0.810305	0.478305	0.848922	0.759335	0.376654	0.145915	0.157507	0.374639	0.575486	0.141642	0.714263	0.754721	0.402579	0.246787	0.703996	0.290732	0.694659	0.804206	0.173866	0.685367	0.766734	0.43279	0.401477	0.165474	0.385533	0.560824	0.615804	0.177972	0.165018	0.158208	0.827149	0.139157	0.670413	0.1695	0.189202	0.821214	0.1659	0.199093
47c3edb7-ba76-4688-bc9c-17d5f7a16c25	92cff9ea-4838-40cf-b541-bcb98c919c3f	590	28	28	2025-08-23T13:42:53.000429Z	0.194234	0.970899	0.72224	1.26462	1.19596	1.11347	1.49035	0.837658	1.58805	1.31292	0.631886	0.189062	0.262128	0.708434	1.09447	0.234645	1.36908	1.4518	0.724015	0.481262	1.33857	0.466921	1.30953	1.58267	0.238687	1.24531	1.36227	0.744343	0.62615	0.22524	0.649996	1.07287	1.12519	0.25479	0.234735	0.240519	1.56804	0.177666	1.18065	0.244001	0.274852	1.52237	0.246978	0.304797
7db2fe72-3d5d-45f2-a6ee-174b6b60a9d7	92cff9ea-4838-40cf-b541-bcb98c919c3f	740	28	28	2025-08-23T13:43:09.000429Z	0.148467	0.5742	0.434234	0.697901	0.704296	0.654482	0.808682	0.487577	0.855534	0.749497	0.379357	0.145591	0.157614	0.383961	0.581605	0.141536	0.717982	0.753319	0.406461	0.249648	0.71898	0.284461	0.699086	0.806232	0.173734	0.695619	0.767522	0.438273	0.404432	0.165661	0.389311	0.563894	0.615979	0.17755	0.16389	0.156877	0.832332	0.139329	0.683156	0.169365	0.18881	0.821626	0.163895	0.198895
96fe7b4e-8295-48fc-a561-37515a08a2a3	92cff9ea-4838-40cf-b541-bcb98c919c3f	590	28	28	2025-08-23T14:02:52.000429Z	0.19437	0.994661	0.742871	1.30013	1.20004	1.1272	1.49275	0.833759	1.60283	1.30523	0.633656	0.186061	0.262758	0.722848	1.10572	0.234396	1.36599	1.45318	0.730077	0.481527	1.37291	0.457738	1.3204	1.58447	0.238141	1.26525	1.36752	0.75457	0.63015	0.225448	0.653063	1.07043	1.12807	0.254048	0.23161	0.23729	1.56546	0.178272	1.20139	0.243747	0.274225	1.52911	0.247458	0.304431
7785175a-4051-4cec-aa96-a3825413d46f	92cff9ea-4838-40cf-b541-bcb98c919c3f	740	28	28	2025-08-23T14:03:08.000429Z	0.148483	0.58575	0.445057	0.70745	0.704248	0.660566	0.80639	0.487555	0.858475	0.745082	0.382182	0.144577	0.158646	0.392428	0.586453	0.142317	0.716286	0.752119	0.410038	0.250079	0.738687	0.283956	0.703304	0.805122	0.173626	0.705768	0.768095	0.444388	0.407357	0.165819	0.392414	0.560206	0.616892	0.177488	0.163162	0.157656	0.828662	0.139918	0.692108	0.16926	0.188443	0.822209	0.164769	0.198757
26dc1a18-eb44-4cd1-bd7d-90800b0531eb	92cff9ea-4838-40cf-b541-bcb98c919c3f	590	28	28	2025-08-23T14:22:53.000429Z	0.193301	1.02166	0.763119	1.3373	1.20182	1.14224	1.49767	0.838092	1.61494	1.30026	0.637812	0.18593	0.264363	0.735907	1.12017	0.23541	1.37342	1.4656	0.737267	0.483426	1.40807	0.446427	1.33548	1.59687	0.238194	1.28402	1.37215	0.768714	0.635076	0.225816	0.657457	1.0072	1.13164	0.254983	0.230306	0.236706	1.57823	0.179034	1.21601	0.244085	0.274015	1.53663	0.250776	0.304628
2c5e6cbb-9d31-4a95-b0ac-3936b1058435	92cff9ea-4838-40cf-b541-bcb98c919c3f	740	28	28	2025-08-23T14:23:09.000429Z	0.148034	0.598489	0.455279	0.720871	0.703174	0.665931	0.806231	0.488707	0.860617	0.74115	0.385286	0.145261	0.159196	0.40047	0.592164	0.142475	0.715386	0.754541	0.413322	0.252177	0.753647	0.276011	0.709912	0.815923	0.17381	0.715615	0.76811	0.452736	0.410643	0.165928	0.395296	0.53606	0.61749	0.178273	0.162877	0.156213	0.832791	0.140166	0.697061	0.169369	0.188309	0.822989	0.165461	0.198824
8477e746-7a2c-477d-8eb7-c655a06c5239	92cff9ea-4838-40cf-b541-bcb98c919c3f	590	28	28	2025-08-23T14:42:50.000429Z	0.192684	1.0472	0.787435	1.33596	1.2026	1.15419	1.5041	0.849041	1.62579	1.30198	0.64201	0.186857	0.265677	0.741556	1.13178	0.235253	1.38554	1.47114	0.739941	0.488095	1.44101	0.44351	1.34789	1.60253	0.238557	1.29998	1.37696	0.781895	0.63992	0.225599	0.658985	1.01797	1.13455	0.256074	0.228164	0.231587	1.58491	0.17937	1.23666	0.244672	0.273893	1.54168	0.257662	0.304811
7ba151ad-0fa6-4127-91f7-ea6e944b9372	92cff9ea-4838-40cf-b541-bcb98c919c3f	740	28	28	2025-08-23T14:43:06.000429Z	0.147481	0.609023	0.468333	0.717244	0.700923	0.669832	0.806927	0.492708	0.864567	0.738588	0.388142	0.144865	0.159733	0.405061	0.597862	0.14268	0.718181	0.754547	0.414984	0.253132	0.770168	0.275481	0.713665	0.818361	0.174041	0.723861	0.768461	0.461118	0.414053	0.166042	0.3967	0.537719	0.6185	0.17874	0.162105	0.155753	0.833746	0.140567	0.703657	0.169669	0.188232	0.822307	0.169385	0.198778
9b3ee873-fae7-460e-9834-cb7c499a7ae9	92cff9ea-4838-40cf-b541-bcb98c919c3f	590	28	28	2025-08-23T15:02:52.000429Z	0.192106	1.06629	0.779788	1.34026	1.20275	1.16892	1.51314	0.852233	1.63005	1.31621	0.646029	0.185364	0.265331	0.747084	1.1422	0.236046	1.39385	1.4749	0.735049	0.485836	1.47287	0.438725	1.36589	1.62007	0.238541	1.30873	1.38394	0.79463	0.643531	0.224948	0.657358	1.0408	1.13634	0.255618	0.22784	0.236516	1.58726	0.179287	1.25088	0.244719	0.273819	1.54454	0.256688	0.304579
1f2ed188-cf45-4d07-9f7f-0e797986fb66	92cff9ea-4838-40cf-b541-bcb98c919c3f	740	28	28	2025-08-23T15:03:08.000429Z	0.147377	0.616032	0.466228	0.718466	0.698407	0.673479	0.808237	0.495162	0.865078	0.745192	0.391161	0.143705	0.16023	0.40901	0.60273	0.143488	0.719794	0.755927	0.412106	0.251772	0.786228	0.274121	0.716922	0.813056	0.17461	0.730219	0.768873	0.46822	0.417143	0.166009	0.397353	0.548495	0.619501	0.179016	0.160531	0.156889	0.831661	0.140607	0.706697	0.169872	0.188423	0.821941	0.169789	0.198775
ad51e9f9-937f-41de-8161-f12f82dba297	92cff9ea-4838-40cf-b541-bcb98c919c3f	590	28	28	2025-08-23T15:22:52.000429Z	0.191342	1.08354	0.799687	1.35588	1.20318	1.18014	1.51838	0.865117	1.64575	1.33862	0.651623	0.18576	0.267605	0.752973	1.15192	0.237428	1.40707	1.46598	0.729259	0.487518	1.50692	0.437225	1.37536	1.61426	0.238577	1.31695	1.39085	0.805807	0.647724	0.2259	0.66177	1.08198	1.14007	0.25667	0.224199	0.231004	1.59127	0.179348	1.26732	0.245255	0.274246	1.55077	0.257834	0.304953
676930b5-0c00-45c9-a6de-ac33343b1f51	92cff9ea-4838-40cf-b541-bcb98c919c3f	740	28	28	2025-08-23T15:23:08.000429Z	0.14685	0.621567	0.477115	0.722497	0.696529	0.676089	0.810214	0.500332	0.874312	0.752896	0.394681	0.143646	0.161113	0.41324	0.60663	0.144028	0.722566	0.749692	0.408833	0.254123	0.80032	0.272612	0.722414	0.819667	0.174918	0.73578	0.76944	0.475479	0.420169	0.166289	0.399299	0.561325	0.620852	0.179297	0.159662	0.156555	0.832321	0.14065	0.712087	0.170071	0.188405	0.821682	0.169766	0.198858
78d0b406-8b90-4165-afbf-5eaaeb0203eb	92cff9ea-4838-40cf-b541-bcb98c919c3f	590	28	28	2025-08-23T15:42:51.000429Z	0.190857	1.09575	0.807439	1.37029	1.20367	1.19432	1.52297	0.867999	1.6517	1.35704	0.658236	0.18342	0.268965	0.758744	1.16198	0.238573	1.42599	1.5001	0.731105	0.499251	1.53678	0.433954	1.39228	1.63498	0.239018	1.32483	1.38504	0.818865	0.651997	0.226106	0.669374	1.10166	1.14433	0.257395	0.223554	0.232802	1.59919	0.179663	1.2806	0.245603	0.274839	1.55665	0.261261	0.305459
67ecee17-d2ac-4d75-823c-875d6c6d042c	92cff9ea-4838-40cf-b541-bcb98c919c3f	740	28	28	2025-08-23T15:43:07.000429Z	0.146207	0.626079	0.481217	0.724768	0.694179	0.680457	0.810978	0.501755	0.876801	0.755024	0.398378	0.143077	0.161978	0.417476	0.610795	0.144395	0.727597	0.758735	0.409566	0.256377	0.813047	0.269587	0.724226	0.818006	0.175283	0.741504	0.766099	0.482654	0.42315	0.166285	0.403796	0.567009	0.621646	0.180151	0.160075	0.156214	0.833837	0.140843	0.715608	0.170065	0.188619	0.821822	0.171159	0.198933
b13b35ac-6713-4763-ac6b-9128e09f1095	92cff9ea-4838-40cf-b541-bcb98c919c3f	590	28	28	2025-08-23T16:02:52.000429Z	0.190115	1.10911	0.816406	1.38389	1.20336	1.2085	1.52233	0.884924	1.66418	1.36187	0.665192	0.182699	0.269973	0.764804	1.16878	0.239627	1.44802	1.49917	0.730964	0.494988	1.56451	0.431399	1.39196	1.62434	0.23848	1.32837	1.37449	0.826474	0.655201	0.226006	0.67926	1.11932	1.14571	0.256989	0.222358	0.234158	1.61408	0.179841	1.29516	0.245658	0.274883	1.56069	0.261281	0.305228
ab250a64-6fa5-46fd-907c-34d8fbf6314d	92cff9ea-4838-40cf-b541-bcb98c919c3f	740	28	28	2025-08-23T16:03:09.000429Z	0.146057	0.631066	0.485197	0.726801	0.692338	0.685079	0.810283	0.508012	0.876433	0.754654	0.402581	0.14349	0.162467	0.422241	0.612686	0.14462	0.732805	0.75564	0.40791	0.258324	0.823289	0.26686	0.722027	0.814365	0.174967	0.743698	0.759143	0.486734	0.425748	0.166246	0.408857	0.570712	0.621076	0.180068	0.158645	0.154916	0.837208	0.140938	0.719496	0.170281	0.188609	0.820772	0.1717	0.198716
ca1437de-189e-4581-9f4a-12169f0573f4	92cff9ea-4838-40cf-b541-bcb98c919c3f	590	28	28	2025-08-23T16:22:53.000429Z	0.191975	1.12329	0.824785	1.39519	1.20377	1.22135	1.51884	0.894345	1.67107	1.39617	0.674096	0.183803	0.270981	0.774853	1.17255	0.242089	1.45374	1.51666	0.724604	0.502569	1.58921	0.433751	1.40352	1.63947	0.239279	1.34433	1.38368	0.836299	0.65917	0.226249	0.693834	1.13621	1.14853	0.256927	0.222604	0.236682	1.62663	0.180585	1.3197	0.246548	0.275086	1.56569	0.267749	0.305565
01adab8f-92db-4db3-a2ee-2d32c158aa9c	92cff9ea-4838-40cf-b541-bcb98c919c3f	740	28	28	2025-08-23T16:23:09.000429Z	0.146692	0.633724	0.489226	0.730595	0.69007	0.68925	0.806512	0.510458	0.880166	0.763063	0.407082	0.143091	0.163191	0.428055	0.613263	0.145737	0.731906	0.758922	0.403818	0.260189	0.833917	0.26765	0.723213	0.814892	0.17499	0.75159	0.760456	0.491927	0.428335	0.166377	0.414397	0.576023	0.621515	0.179935	0.157843	0.154505	0.841415	0.141261	0.729417	0.170563	0.188457	0.819898	0.173671	0.198691
81720548-e926-45a8-a488-c7082b4d87ce	92cff9ea-4838-40cf-b541-bcb98c919c3f	590	28	28	2025-08-23T16:42:52.000429Z	0.192797	1.13801	0.826833	1.41479	1.20429	1.23027	1.51052	0.896978	1.68669	1.39409	0.68286	0.183621	0.27263	0.784933	1.17805	0.241815	1.46969	1.5233	0.723423	0.50598	1.60941	0.440154	1.41366	1.64869	0.238883	1.36897	1.39678	0.848549	0.662624	0.226884	0.705088	1.16094	1.15105	0.257771	0.21983	0.231841	1.63891	0.180836	1.34557	0.24719	0.275407	1.57086	0.273519	0.306169
e9bda1fc-5686-441e-a6e0-878a33d91329	92cff9ea-4838-40cf-b541-bcb98c919c3f	740	28	28	2025-08-23T16:43:08.000429Z	0.147223	0.634465	0.491352	0.734486	0.688032	0.692661	0.800851	0.514258	0.882373	0.764598	0.411847	0.142888	0.16337	0.434534	0.614432	0.146042	0.73454	0.760227	0.402831	0.260995	0.843746	0.273779	0.724711	0.817759	0.174636	0.762153	0.762104	0.498466	0.430756	0.166555	0.42088	0.585776	0.622674	0.179814	0.157344	0.155158	0.845116	0.141367	0.741081	0.170757	0.188458	0.819527	0.176345	0.198674
cba543c7-4eb6-4d7c-80a6-1a1897c79237	92cff9ea-4838-40cf-b541-bcb98c919c3f	590	28	28	2025-08-23T17:02:53.000429Z	0.193261	1.15165	0.836199	1.4314	1.20453	1.23959	1.50585	0.894925	1.68785	1.41806	0.690416	0.181307	0.271979	0.793423	1.18304	0.240721	1.46923	1.52673	0.717721	0.500596	1.6254	0.445139	1.41646	1.65314	0.237529	1.39814	1.39245	0.857101	0.665288	0.227024	0.711595	1.16935	1.15186	0.256723	0.218702	0.23539	1.64964	0.180816	1.35118	0.247425	0.275518	1.57413	0.270478	0.305849
01964d3d-7740-48ed-b652-194cbc4a4d11	92cff9ea-4838-40cf-b541-bcb98c919c3f	740	28	28	2025-08-23T17:03:09.000429Z	0.147965	0.639028	0.49821	0.739352	0.685961	0.695987	0.796565	0.511421	0.881093	0.767659	0.416675	0.141692	0.163747	0.439055	0.615732	0.145615	0.731311	0.759669	0.398034	0.259106	0.850614	0.278934	0.723059	0.811393	0.174508	0.770099	0.758692	0.503683	0.433116	0.166584	0.424656	0.586601	0.622933	0.179168	0.156008	0.155227	0.846046	0.141485	0.746336	0.171011	0.188644	0.819302	0.174811	0.198579
71810f03-170b-41fb-8548-e35bb073c07f	92cff9ea-4838-40cf-b541-bcb98c919c3f	590	28	28	2025-08-23T17:22:52.000429Z	0.193145	1.16542	0.854545	1.43589	1.20408	1.24957	1.50479	0.922783	1.68671	1.42113	0.697388	0.181108	0.273267	0.803031	1.18857	0.238729	1.47696	1.53152	0.714029	0.498298	1.64184	0.449129	1.42624	1.65895	0.237744	1.43029	1.39553	0.868214	0.669029	0.227817	0.722026	1.17772	1.15502	0.257195	0.217996	0.235734	1.6583	0.181022	1.35867	0.248125	0.276467	1.58107	0.26894	0.306733
37bdfba9-bb45-4435-b06c-ffebfc0c6c99	92cff9ea-4838-40cf-b541-bcb98c919c3f	740	28	28	2025-08-23T17:23:08.000429Z	0.147246	0.643378	0.507805	0.740193	0.683806	0.698668	0.792732	0.524101	0.876815	0.76798	0.420449	0.141361	0.164408	0.444277	0.617176	0.143921	0.730633	0.757376	0.396238	0.260836	0.856797	0.282082	0.726138	0.820407	0.174115	0.78187	0.758896	0.509896	0.435608	0.166871	0.430586	0.589682	0.623517	0.179785	0.156448	0.154613	0.850403	0.141599	0.748072	0.171289	0.189102	0.820487	0.17413	0.198763
33af3268-8a34-4813-a554-1f54fd1e301c	92cff9ea-4838-40cf-b541-bcb98c919c3f	590	28	28	2025-08-23T17:42:52.000429Z	0.19346	1.17808	0.85983	1.43311	1.20498	1.25837	1.50553	0.941086	1.67821	1.43317	0.704606	0.181047	0.274476	0.817583	1.19822	0.239816	1.48783	1.53791	0.715028	0.517534	1.65692	0.455857	1.43994	1.66945	0.238507	1.45477	1.40048	0.8792	0.672695	0.22769	0.733644	1.18151	1.15945	0.257914	0.217673	0.238183	1.6619	0.181789	1.37352	0.248442	0.27717	1.58938	0.271125	0.307104
9538bb77-558a-4c07-9c2a-ffc6719c9dee	92cff9ea-4838-40cf-b541-bcb98c919c3f	740	28	28	2025-08-23T17:43:08.000429Z	0.146993	0.649433	0.509146	0.7398	0.682329	0.701426	0.791153	0.528699	0.870014	0.771497	0.424615	0.141886	0.16477	0.452883	0.620068	0.144211	0.730099	0.756881	0.396161	0.268869	0.862373	0.28619	0.727631	0.821505	0.17431	0.791932	0.759035	0.516165	0.438348	0.166914	0.436367	0.592835	0.625841	0.179788	0.15519	0.154505	0.852698	0.141894	0.753238	0.171256	0.189395	0.822683	0.1749	0.198771
2d8f2127-c384-42e0-a0c4-4631af6a20fe	92cff9ea-4838-40cf-b541-bcb98c919c3f	590	28	28	2025-08-23T18:02:52.000429Z	0.192009	1.19177	0.86821	1.43155	1.20458	1.26632	1.50561	0.957997	1.67782	1.4384	0.710275	0.181467	0.274314	0.825922	1.20019	0.239685	1.49693	1.54733	0.710812	0.514847	1.66184	0.460731	1.43924	1.67678	0.23804	1.47265	1.4032	0.887808	0.676243	0.22755	0.741217	1.18566	1.15999	0.256894	0.215639	0.236166	1.66439	0.181683	1.39645	0.248639	0.277401	1.59753	0.273703	0.307097
ebe54256-c0de-4bf8-8942-014c5cacba3c	92cff9ea-4838-40cf-b541-bcb98c919c3f	740	28	28	2025-08-23T18:03:08.000429Z	0.146129	0.654429	0.514634	0.739093	0.679729	0.704311	0.788606	0.539218	0.868922	0.773063	0.428451	0.140758	0.16501	0.456887	0.620096	0.144639	0.729478	0.75912	0.393148	0.267321	0.8643	0.289522	0.726286	0.824509	0.174157	0.798823	0.758946	0.520795	0.441215	0.166813	0.440173	0.591728	0.625577	0.179835	0.155086	0.154347	0.852721	0.142075	0.760659	0.171508	0.189467	0.824612	0.176197	0.198744
3fcb807d-25fc-4bcf-b9d2-be89109a924e	92cff9ea-4838-40cf-b541-bcb98c919c3f	590	28	28	2025-08-23T18:22:52.000429Z	0.191777	1.20284	0.881623	1.43084	1.20467	1.272	1.5081	0.953219	1.68968	1.44221	0.717566	0.181196	0.27565	0.840216	1.20745	0.242684	1.50707	1.56323	0.713702	0.51718	1.66048	0.463833	1.46372	1.68555	0.238344	1.48185	1.40867	0.9013	0.681634	0.22873	0.749779	1.19265	1.16399	0.258134	0.216727	0.238537	1.6654	0.182163	1.43637	0.249584	0.278593	1.60829	0.282135	0.307834
3d237e3f-ee7e-4cab-aec4-efdbadf19f39	92cff9ea-4838-40cf-b541-bcb98c919c3f	740	28	28	2025-08-23T18:23:08.000429Z	0.146345	0.659753	0.520716	0.736708	0.678299	0.707338	0.787407	0.535371	0.870513	0.773488	0.432408	0.140463	0.165418	0.464887	0.621746	0.146444	0.73054	0.764096	0.393722	0.266504	0.863153	0.290459	0.732557	0.820395	0.17447	0.802099	0.759933	0.527711	0.444442	0.166904	0.445341	0.591925	0.627137	0.1796	0.153646	0.155306	0.851889	0.142234	0.773172	0.171786	0.189834	0.827843	0.179898	0.198882
2da593e7-25ea-4ab2-a35f-f802f2dbcc4b	92cff9ea-4838-40cf-b541-bcb98c919c3f	590	28	28	2025-08-23T18:42:51.000429Z	0.19053	1.21035	0.901049	1.42303	1.20574	1.27998	1.50784	0.935827	1.68751	1.44515	0.724145	0.181386	0.277607	0.849398	1.21378	0.243602	1.51823	1.57187	0.714064	0.524634	1.64889	0.462539	1.47548	1.69825	0.238142	1.47118	1.41343	0.9122	0.687847	0.228304	0.757378	1.19237	1.16688	0.259342	0.213943	0.233952	1.66023	0.18228	1.45026	0.250232	0.279072	1.61685	0.284562	0.308402
30912d0a-87d5-49f2-b951-71f9e1dde709	92cff9ea-4838-40cf-b541-bcb98c919c3f	740	28	28	2025-08-23T18:43:07.000429Z	0.145655	0.663684	0.5291	0.732868	0.676188	0.710939	0.786179	0.528756	0.868199	0.770759	0.436813	0.140442	0.166083	0.470613	0.623623	0.147451	0.732572	0.766269	0.393587	0.270751	0.856258	0.289755	0.734265	0.827344	0.174264	0.794901	0.760877	0.534271	0.448652	0.167001	0.449788	0.591748	0.628126	0.180026	0.153287	0.154014	0.850911	0.142061	0.774405	0.172041	0.190179	0.831056	0.181467	0.198956
2f3b1a42-42b3-4473-a40b-44f61796f545	92cff9ea-4838-40cf-b541-bcb98c919c3f	590	28	28	2025-08-23T19:02:52.000429Z	0.189287	1.21637	0.895066	1.42145	1.2046	1.28626	1.50957	0.941455	1.68955	1.45038	0.727936	0.180359	0.279158	0.863062	1.21715	0.244859	1.53377	1.57724	0.712808	0.524442	1.61973	0.463682	1.4841	1.69963	0.238039	1.48138	1.41702	0.920873	0.694196	0.2281	0.762622	1.19315	1.16413	0.258221	0.214323	0.237843	1.65179	0.181855	1.46797	0.25044	0.279128	1.62589	0.280453	0.308114
5d0e2097-6bfc-4a74-83c3-2cd8716b1764	92cff9ea-4838-40cf-b541-bcb98c919c3f	740	28	28	2025-08-23T19:03:08.000429Z	0.144801	0.666124	0.529117	0.730446	0.674889	0.714749	0.785782	0.53004	0.867459	0.772085	0.440606	0.140654	0.166973	0.477757	0.624499	0.146932	0.73643	0.76786	0.392137	0.271035	0.838415	0.290839	0.736803	0.828696	0.174363	0.796669	0.761615	0.539122	0.453011	0.167106	0.45288	0.590497	0.627125	0.17976	0.152982	0.153229	0.846067	0.141844	0.7782	0.172236	0.190389	0.833588	0.179362	0.198935
a6eaa600-ee8a-4b0e-9cd3-95e496ae929d	92cff9ea-4838-40cf-b541-bcb98c919c3f	590	28	28	2025-08-23T19:22:52.000429Z	0.188506	1.2296	0.895891	1.42279	1.2045	1.28649	1.51183	0.954597	1.69579	1.45533	0.735466	0.178096	0.279781	0.87206	1.22591	0.243876	1.54562	1.5844	0.709316	0.524244	1.58196	0.463167	1.49493	1.69517	0.238248	1.50069	1.42436	0.932463	0.702518	0.228656	0.767962	1.197	1.16916	0.260091	0.212758	0.23465	1.64953	0.182272	1.4834	0.251152	0.28029	1.63577	0.281914	0.308729
d4011744-7745-454e-a7c5-ddd4a7c563ee	92cff9ea-4838-40cf-b541-bcb98c919c3f	740	28	28	2025-08-23T19:23:08.000429Z	0.144545	0.67287	0.531603	0.728864	0.672589	0.716339	0.784063	0.53618	0.869419	0.772159	0.444826	0.13975	0.167397	0.482838	0.626915	0.147077	0.741022	0.770809	0.390522	0.269115	0.817709	0.289829	0.738908	0.830675	0.174872	0.80215	0.763131	0.546029	0.45864	0.167317	0.456224	0.590725	0.629654	0.180103	0.152381	0.155884	0.840448	0.142039	0.78067	0.172609	0.190778	0.837315	0.180962	0.199134
59a30fbb-9481-43d1-a434-e03f0d7574d7	92cff9ea-4838-40cf-b541-bcb98c919c3f	590	28	28	2025-08-23T19:42:52.000429Z	0.187278	1.23273	0.9104	1.4248	1.20513	1.29038	1.5129	0.967731	1.70253	1.46176	0.740448	0.177247	0.280433	0.883228	1.22873	0.244976	1.55459	1.58902	0.712616	0.522947	1.5395	0.462323	1.50605	1.70253	0.2381	1.51239	1.42841	0.93963	0.711308	0.229104	0.774061	1.20331	1.1719	0.260021	0.212305	0.238391	1.64247	0.18254	1.49696	0.25189	0.280961	1.64545	0.287612	0.309218
a0324bbb-c314-4e3d-abc0-a3275b6ea3e0	92cff9ea-4838-40cf-b541-bcb98c919c3f	740	28	28	2025-08-23T19:43:07.000429Z	0.14288	0.670821	0.537517	0.727767	0.671253	0.714962	0.782579	0.541731	0.870918	0.773191	0.448349	0.138973	0.167799	0.488277	0.627075	0.147144	0.742952	0.771555	0.391697	0.269835	0.793389	0.290719	0.741136	0.827751	0.17526	0.804636	0.763278	0.550181	0.465049	0.167374	0.459232	0.590172	0.630735	0.180847	0.152971	0.155337	0.833455	0.142304	0.783903	0.172895	0.191139	0.840357	0.183043	0.199272
d05dbacc-4c39-4edb-9013-8f72233645fd	92cff9ea-4838-40cf-b541-bcb98c919c3f	590	28	28	2025-08-23T20:02:52.000429Z	0.186398	1.24878	0.923638	1.42685	1.20547	1.29965	1.51361	0.974221	1.70494	1.46305	0.74574	0.176839	0.28073	0.892097	1.23129	0.246169	1.56026	1.59198	0.713358	0.518269	1.50648	0.463215	1.50487	1.70332	0.237923	1.51479	1.4309	0.945309	0.721287	0.229004	0.778637	1.20449	1.17155	0.260077	0.210085	0.232283	1.63122	0.182241	1.50741	0.252423	0.281722	1.65334	0.287759	0.308942
049c33ff-b3ce-4af3-9220-86cff75bd7d0	92cff9ea-4838-40cf-b541-bcb98c919c3f	740	28	28	2025-08-23T20:03:08.000429Z	0.143025	0.672764	0.545207	0.726866	0.670384	0.717074	0.781007	0.544693	0.870918	0.773326	0.452151	0.138926	0.168041	0.492814	0.627397	0.148099	0.744764	0.772351	0.391931	0.271024	0.773179	0.292586	0.740829	0.837027	0.174823	0.804394	0.763099	0.55263	0.472256	0.167584	0.461445	0.58928	0.630735	0.180628	0.152445	0.154421	0.829088	0.142271	0.785052	0.173349	0.191691	0.843024	0.182556	0.199275
f13992b5-0719-44dc-9ee4-4333b32cb514	92cff9ea-4838-40cf-b541-bcb98c919c3f	590	28	28	2025-08-23T20:22:52.000429Z	0.186356	1.27419	0.935727	1.42912	1.20606	1.30675	1.5135	0.99314	1.70183	1.46969	0.751327	0.177641	0.282237	0.905069	1.23854	0.248571	1.57052	1.59385	0.712349	0.520902	1.49267	0.467242	1.52109	1.72426	0.238744	1.53107	1.43463	0.956426	0.731531	0.229682	0.784585	1.20583	1.17872	0.260478	0.212262	0.24139	1.63023	0.182796	1.53051	0.253442	0.282707	1.66132	0.290891	0.309869
ead81994-ef92-4083-a9ca-3b1f9cc91dc5	92cff9ea-4838-40cf-b541-bcb98c919c3f	740	28	28	2025-08-23T20:23:08.000429Z	0.142629	0.675694	0.551239	0.726219	0.668501	0.720902	0.779502	0.55206	0.867005	0.773401	0.454982	0.138728	0.168766	0.499776	0.628794	0.148819	0.74788	0.773655	0.390802	0.267665	0.762254	0.293815	0.744305	0.84063	0.175193	0.808831	0.764185	0.558508	0.47976	0.167983	0.465475	0.590666	0.633179	0.18106	0.152345	0.155182	0.826145	0.142523	0.791479	0.17387	0.192113	0.846379	0.185134	0.19952
709c155a-c0f4-4c80-9ba1-aceff4871d2e	92cff9ea-4838-40cf-b541-bcb98c919c3f	590	28	28	2025-08-23T20:42:50.000429Z	0.186101	1.29882	0.948105	1.43254	1.205	1.3133	1.51429	0.999032	1.69691	1.47314	0.757017	0.176526	0.282054	0.914535	1.24305	0.246465	1.57668	1.59512	0.713185	0.517167	1.48195	0.470339	1.51817	1.71052	0.238186	1.54467	1.43724	0.961499	0.73437	0.230577	0.787734	1.20733	1.17688	0.259529	0.20893	0.23633	1.63153	0.182852	1.5437	0.253952	0.283202	1.66772	0.284822	0.309632
f4e9b06c-4781-442b-a1a4-e052c757c076	92cff9ea-4838-40cf-b541-bcb98c919c3f	740	28	28	2025-08-23T20:43:06.000429Z	0.142405	0.67976	0.5573	0.725264	0.66693	0.723814	0.778293	0.555139	0.863766	0.773377	0.458946	0.138166	0.168571	0.504752	0.628809	0.147857	0.74941	0.773216	0.390034	0.269062	0.75281	0.296362	0.741496	0.84015	0.175251	0.811437	0.764076	0.560155	0.482988	0.168182	0.466936	0.588425	0.632231	0.180208	0.151459	0.153647	0.823091	0.142333	0.794309	0.17386	0.192327	0.847945	0.180505	0.199093
5c306180-fb39-4201-9775-c6adc878805b	92cff9ea-4838-40cf-b541-bcb98c919c3f	590	28	28	2025-08-23T21:02:53.000429Z	0.185475	1.31086	0.958673	1.43604	1.20657	1.32135	1.51555	1.00705	1.70167	1.47585	0.765653	0.176064	0.282561	0.928912	1.25254	0.244165	1.58649	1.59579	0.713766	0.524735	1.47843	0.473488	1.53681	1.71148	0.238451	1.55567	1.44268	0.977177	0.732764	0.230867	0.79474	1.21249	1.18494	0.260504	0.209419	0.240432	1.63128	0.182937	1.55223	0.254339	0.283855	1.67638	0.276088	0.310251
49d3b6bf-9fda-4d65-8f1e-a3342ecb4e2a	92cff9ea-4838-40cf-b541-bcb98c919c3f	740	28	28	2025-08-23T21:03:09.000429Z	0.141286	0.684841	0.561625	0.725351	0.665753	0.726859	0.776884	0.559284	0.862188	0.773228	0.463825	0.138149	0.168885	0.511394	0.631423	0.146839	0.752521	0.773545	0.390405	0.271185	0.748144	0.29835	0.746393	0.832818	0.175345	0.813922	0.765261	0.567758	0.483967	0.168538	0.471283	0.590245	0.637303	0.181044	0.151993	0.155752	0.820374	0.142486	0.795676	0.174321	0.192687	0.852186	0.176313	0.199633
ad50bed2-bc46-44c2-a8a0-6dc8fe306f5d	92cff9ea-4838-40cf-b541-bcb98c919c3f	590	28	28	2025-08-23T21:22:52.000429Z	0.184037	1.31823	0.971738	1.43708	1.20638	1.33111	1.51672	1.02205	1.70922	1.48345	0.772174	0.178277	0.283938	0.939307	1.26269	0.243901	1.59392	1.59152	0.717698	0.526676	1.47757	0.476068	1.53656	1.71905	0.238912	1.56168	1.44467	0.986706	0.723332	0.231279	0.800401	1.21486	1.18342	0.262007	0.211254	0.243492	1.6268	0.183264	1.56053	0.25522	0.285081	1.68375	0.274805	0.310976
e4f2c3f8-d7b3-4ba2-bdb5-7972a196f62a	92cff9ea-4838-40cf-b541-bcb98c919c3f	740	28	28	2025-08-23T21:23:09.000429Z	0.140866	0.688058	0.567203	0.725204	0.663956	0.729575	0.775978	0.564409	0.863161	0.773814	0.4676	0.138098	0.16936	0.516531	0.633784	0.146741	0.754613	0.771016	0.391653	0.273989	0.744789	0.300485	0.743935	0.829077	0.17589	0.814053	0.765275	0.573158	0.478614	0.168581	0.473593	0.590142	0.636442	0.181033	0.150626	0.155945	0.817895	0.142663	0.797072	0.174576	0.193135	0.854855	0.175579	0.199667
3b0cb937-c0e7-4b86-9cf9-7fa78a3c60a5	92cff9ea-4838-40cf-b541-bcb98c919c3f	590	28	28	2025-08-23T21:42:51.000429Z	0.183611	1.3358	0.983416	1.43924	1.20593	1.34254	1.51788	1.02709	1.71667	1.48459	0.777753	0.17707	0.284617	0.9523	1.27189	0.242233	1.60042	1.57967	0.71527	0.523917	1.47358	0.479084	1.53592	1.71117	0.238972	1.56268	1.44428	0.993635	0.70818	0.231325	0.806207	1.21523	1.18639	0.261301	0.209687	0.239266	1.6262	0.183036	1.56707	0.255621	0.285317	1.69096	0.273825	0.310945
9d3fec44-34ea-4184-9667-24b892938fa6	92cff9ea-4838-40cf-b541-bcb98c919c3f	740	28	28	2025-08-23T21:43:07.000429Z	0.140962	0.691345	0.573748	0.724213	0.662656	0.733171	0.774683	0.566295	0.863258	0.773441	0.472134	0.137096	0.169986	0.522688	0.634188	0.146037	0.755213	0.766057	0.389488	0.275184	0.739104	0.301987	0.743737	0.83353	0.175427	0.811939	0.764522	0.576668	0.469732	0.168523	0.475038	0.58904	0.636145	0.18088	0.151186	0.154074	0.81592	0.142484	0.79696	0.174723	0.19342	0.856436	0.174595	0.199538
019da26c-e868-4367-97ef-cbc638cd085b	92cff9ea-4838-40cf-b541-bcb98c919c3f	590	28	28	2025-08-23T22:02:53.000429Z	0.183722	1.34272	0.993288	1.4442	1.20635	1.3528	1.5199	1.03037	1.72629	1.48928	0.784763	0.174542	0.285412	0.963463	1.28091	0.242883	1.60555	1.57068	0.716438	0.529816	1.47191	0.482047	1.53872	1.69239	0.23889	1.56609	1.44892	1.00348	0.69347	0.231331	0.807622	1.21836	1.18682	0.261666	0.208075	0.238712	1.63106	0.182877	1.57483	0.255911	0.286533	1.69764	0.276227	0.31109
0863b7ca-aa81-429b-8ebf-531e47be5412	92cff9ea-4838-40cf-b541-bcb98c919c3f	740	28	28	2025-08-23T22:03:09.000429Z	0.141426	0.694141	0.577808	0.724144	0.661651	0.736642	0.773963	0.567381	0.865238	0.77359	0.476052	0.137374	0.170255	0.528285	0.63724	0.146671	0.75723	0.761488	0.390549	0.273252	0.735893	0.303423	0.744179	0.831127	0.176429	0.810687	0.765945	0.581691	0.460437	0.168656	0.477339	0.589287	0.637668	0.18159	0.151435	0.155168	0.814261	0.142447	0.797039	0.175014	0.194099	0.859608	0.176605	0.199799
861a148e-0fa9-4d97-a6c5-dcc16886fda3	92cff9ea-4838-40cf-b541-bcb98c919c3f	590	28	28	2025-08-23T22:22:53.000429Z	0.183239	1.35574	1.00497	1.44452	1.20667	1.36293	1.52073	1.03425	1.72954	1.49394	0.791239	0.174531	0.286742	0.97771	1.28266	0.243914	1.61038	1.56146	0.723429	0.531209	1.46828	0.484129	1.53948	1.69001	0.23968	1.56964	1.4516	1.0107	0.684009	0.232004	0.816747	1.22383	1.18994	0.262988	0.208276	0.239284	1.63207	0.183105	1.57857	0.256973	0.287881	1.70677	0.27605	0.312085
0ab4bd20-b9ca-477d-993d-3383be35ee45	92cff9ea-4838-40cf-b541-bcb98c919c3f	740	28	28	2025-08-23T22:23:09.000429Z	0.140573	0.697118	0.583936	0.722977	0.660741	0.739518	0.773325	0.567377	0.865912	0.773255	0.479932	0.138474	0.170744	0.536308	0.635851	0.147008	0.757874	0.756807	0.392548	0.276073	0.731289	0.303862	0.74211	0.826725	0.176202	0.808336	0.766604	0.583885	0.452511	0.168903	0.481041	0.590171	0.638688	0.181768	0.150725	0.154611	0.812971	0.142472	0.794523	0.175474	0.19469	0.86251	0.177403	0.199908
9a098d5d-61c5-401f-9bac-6565b679ea8e	92cff9ea-4838-40cf-b541-bcb98c919c3f	590	28	28	2025-08-23T22:42:52.000429Z	0.182528	1.36587	1.01575	1.44848	1.20722	1.37348	1.52161	1.04555	1.73974	1.49907	0.797867	0.174988	0.287735	0.994608	1.28865	0.246122	1.6112	1.5531	0.722885	0.532761	1.46702	0.484774	1.5402	1.69237	0.241158	1.57273	1.45734	1.02034	0.674819	0.232374	0.82234	1.22634	1.19437	0.264479	0.209073	0.243842	1.63197	0.183269	1.58215	0.257782	0.288727	1.71417	0.285633	0.312706
df8dce70-3ebf-41e7-a825-46657f3aeeb1	92cff9ea-4838-40cf-b541-bcb98c919c3f	740	28	28	2025-08-23T22:43:08.000429Z	0.140395	0.699126	0.588612	0.723159	0.658896	0.742674	0.771665	0.573363	0.869186	0.773457	0.483479	0.137446	0.171258	0.543504	0.637368	0.14827	0.757433	0.752358	0.392302	0.275412	0.729394	0.303989	0.740008	0.823952	0.176703	0.805765	0.767419	0.589931	0.446061	0.169004	0.483442	0.590512	0.64091	0.18217	0.150294	0.155391	0.8124	0.142439	0.792771	0.175839	0.195279	0.865494	0.181534	0.200134
7067e81e-e8dd-4c28-9118-93cff6f270b0	92cff9ea-4838-40cf-b541-bcb98c919c3f	590	28	28	2025-08-23T23:02:52.000429Z	0.180999	1.37623	1.02675	1.44993	1.20971	1.38416	1.52196	1.0568	1.74588	1.50088	0.804239	0.174057	0.288631	0.998848	1.29849	0.245938	1.60756	1.55108	0.722758	0.537048	1.46345	0.486423	1.53816	1.69201	0.240055	1.57497	1.45873	1.03111	0.665783	0.23222	0.828555	1.22778	1.19654	0.264851	0.208315	0.243949	1.6321	0.183169	1.58913	0.258251	0.289666	1.72144	0.284524	0.312966
e07f5e84-da40-43af-8b11-62ebe342f67c	92cff9ea-4838-40cf-b541-bcb98c919c3f	740	28	28	2025-08-23T23:03:08.000429Z	0.140171	0.701185	0.593659	0.721744	0.659413	0.74591	0.770578	0.576737	0.870988	0.772694	0.487206	0.138019	0.171692	0.546163	0.639913	0.147688	0.755568	0.749712	0.391822	0.279023	0.724373	0.305299	0.737864	0.823086	0.176811	0.802847	0.767628	0.594748	0.439732	0.169182	0.486089	0.591546	0.64124	0.182563	0.150375	0.155861	0.810058	0.142481	0.793208	0.176162	0.19577	0.868356	0.181088	0.200089
320dad88-3c17-4231-98b4-0c6295722f0b	92cff9ea-4838-40cf-b541-bcb98c919c3f	590	28	28	2025-08-23T23:22:52.000429Z	0.18105	1.38572	1.03964	1.45142	1.20971	1.39191	1.52245	1.06542	1.74537	1.50334	0.810579	0.174176	0.28977	1.00996	1.31015	0.246569	1.59906	1.5564	0.726648	0.537756	1.46008	0.485725	1.54379	1.71113	0.24071	1.57863	1.45668	1.04031	0.657565	0.232904	0.836517	1.23043	1.19832	0.266504	0.207621	0.239955	1.62944	0.183277	1.60476	0.258894	0.290973	1.72907	0.280514	0.313109
14d058d5-cfd0-4883-bdf6-c6e6daf1134b	92cff9ea-4838-40cf-b541-bcb98c919c3f	740	28	28	2025-08-23T23:23:08.000429Z	0.139961	0.704123	0.598716	0.720911	0.657747	0.748057	0.769183	0.579848	0.870674	0.77278	0.490663	0.138014	0.172084	0.551696	0.643612	0.147869	0.749902	0.750142	0.393419	0.279916	0.720524	0.305724	0.736414	0.822395	0.176957	0.800971	0.765995	0.598516	0.433414	0.169323	0.48868	0.590661	0.642586	0.182585	0.150298	0.155464	0.808933	0.142527	0.79666	0.176568	0.196275	0.870738	0.178446	0.200095
5111ec5a-a746-496b-8e3f-6ab2647cd66c	92cff9ea-4838-40cf-b541-bcb98c919c3f	590	28	28	2025-08-23T23:42:53.000429Z	0.180876	1.39874	1.05111	1.45289	1.21079	1.39595	1.52246	1.07012	1.74668	1.50474	0.816723	0.176491	0.290749	1.02437	1.31518	0.249035	1.5897	1.55988	0.731107	0.541247	1.45592	0.486684	1.54596	1.70607	0.241119	1.58374	1.45782	1.04688	0.646878	0.233103	0.839859	1.23116	1.20003	0.265425	0.208668	0.245253	1.63051	0.183504	1.62162	0.259376	0.29154	1.73458	0.278143	0.313273
60a0209f-087b-4cd3-b123-8f2ecd3869ee	92cff9ea-4838-40cf-b541-bcb98c919c3f	740	28	28	2025-08-23T23:43:09.000429Z	0.139326	0.706155	0.604318	0.720765	0.656898	0.74876	0.767214	0.582311	0.871288	0.772505	0.494288	0.13602	0.172566	0.556492	0.644782	0.148689	0.745118	0.750138	0.394464	0.276987	0.717744	0.30731	0.735839	0.821639	0.176657	0.800556	0.76525	0.601453	0.427148	0.169401	0.490625	0.59024	0.641428	0.182846	0.150439	0.155488	0.806748	0.142587	0.801366	0.176763	0.196619	0.873063	0.176847	0.200126
3ea1709b-6156-436c-86df-5846e126b579	92cff9ea-4838-40cf-b541-bcb98c919c3f	590	28	28	2025-08-24T00:02:53.000429Z	0.180174	1.4014	1.06182	1.4574	1.21216	1.39738	1.52275	1.07409	1.74498	1.50724	0.821996	0.173024	0.291246	1.0342	1.3231	0.248812	1.5822	1.55849	0.724355	0.527239	1.45409	0.488446	1.55075	1.70896	0.241012	1.58956	1.4622	1.05596	0.63791	0.233305	0.840232	1.2324	1.2014	0.265741	0.206235	0.238477	1.63026	0.183553	1.63351	0.259639	0.292491	1.73942	0.273192	0.313406
a67a202a-fc8f-4463-bf4f-278767499a88	92cff9ea-4838-40cf-b541-bcb98c919c3f	740	28	28	2025-08-24T00:03:09.000429Z	0.139132	0.708603	0.608903	0.720369	0.656557	0.749064	0.765957	0.585495	0.869913	0.771901	0.497715	0.1379	0.172861	0.562173	0.646676	0.149243	0.739707	0.748696	0.391878	0.276293	0.71501	0.308613	0.7364	0.8203	0.176854	0.801103	0.765786	0.605498	0.419916	0.169592	0.492979	0.590602	0.643782	0.182848	0.150577	0.155803	0.805375	0.142586	0.804023	0.176715	0.197119	0.876042	0.174815	0.199999
a83492bb-259d-43e2-a911-bee063fb1c6c	92cff9ea-4838-40cf-b541-bcb98c919c3f	590	28	28	2025-08-24T00:22:52.000429Z	0.180321	1.41621	1.07175	1.45975	1.21084	1.40775	1.52515	1.08281	1.7487	1.5112	0.829192	0.173746	0.29176	1.05277	1.32998	0.249054	1.58116	1.56472	0.726605	0.542109	1.45331	0.49295	1.55205	1.6999	0.240538	1.59702	1.46421	1.06619	0.628746	0.234074	0.847086	1.23518	1.20714	0.265879	0.207877	0.244959	1.63405	0.183656	1.6425	0.260608	0.292991	1.74711	0.275227	0.314065
6ece5696-474a-49b1-84e8-d680047778e0	92cff9ea-4838-40cf-b541-bcb98c919c3f	740	28	28	2025-08-24T00:23:08.000429Z	0.139294	0.710593	0.61254	0.719744	0.654732	0.753615	0.765191	0.586144	0.872266	0.772327	0.501177	0.137052	0.172924	0.570165	0.648203	0.149165	0.73703	0.748307	0.39147	0.278611	0.712842	0.309715	0.735389	0.817025	0.177408	0.802726	0.766806	0.609953	0.414163	0.169731	0.495123	0.590371	0.645501	0.182757	0.14974	0.156925	0.804318	0.142516	0.80548	0.177224	0.19729	0.878814	0.175326	0.200225
9f7d621c-6216-4fd8-9461-50bf5e5e0af6	92cff9ea-4838-40cf-b541-bcb98c919c3f	590	28	28	2025-08-24T00:42:52.000429Z	0.180207	1.4181	1.08349	1.45971	1.21446	1.41509	1.52621	1.08855	1.74423	1.51355	0.835724	0.173778	0.293654	1.0599	1.33657	0.24747	1.58199	1.56376	0.729003	0.537202	1.45209	0.496335	1.55348	1.70778	0.242091	1.60886	1.4654	1.06605	0.619597	0.234114	0.854636	1.23727	1.20943	0.265974	0.20818	0.244923	1.63274	0.183656	1.65107	0.261168	0.293473	1.75302	0.274158	0.314462
48b0b8ad-8415-412c-93b4-d6c99cc7b6de	92cff9ea-4838-40cf-b541-bcb98c919c3f	740	28	28	2025-08-24T00:43:08.000429Z	0.138708	0.711227	0.618478	0.718361	0.655187	0.753835	0.763896	0.589131	0.86952	0.771533	0.50444	0.13566	0.173663	0.572647	0.649601	0.147901	0.735892	0.746978	0.39336	0.28213	0.709484	0.312011	0.736328	0.818382	0.177898	0.806158	0.767204	0.609511	0.408262	0.169816	0.496849	0.590627	0.646569	0.182863	0.150814	0.155948	0.802102	0.142578	0.808352	0.17754	0.197515	0.881348	0.174678	0.200329
0a31b2a2-1d70-4667-8da1-2773a59b6f21	92cff9ea-4838-40cf-b541-bcb98c919c3f	590	28	28	2025-08-24T01:02:53.000429Z	0.179424	1.41844	1.09382	1.46168	1.21382	1.42474	1.52488	1.09398	1.73457	1.51802	0.841076	0.171904	0.293911	1.0706	1.34366	0.245526	1.58309	1.56823	0.729947	0.540774	1.44934	0.497221	1.55707	1.71263	0.242104	1.62238	1.46566	1.07954	0.612039	0.2343	0.858073	1.24039	1.21065	0.266478	0.205688	0.238447	1.63233	0.183499	1.66134	0.261227	0.294173	1.75787	0.2704	0.314517
3681c7c0-8fe6-494c-a649-2dbaa6426ea7	92cff9ea-4838-40cf-b541-bcb98c919c3f	740	28	28	2025-08-24T01:03:09.000429Z	0.138374	0.711587	0.622597	0.717974	0.653846	0.754347	0.762572	0.591773	0.863812	0.771707	0.507631	0.135358	0.173969	0.578354	0.651213	0.147195	0.734037	0.747096	0.394081	0.279416	0.707236	0.313474	0.733771	0.809269	0.178187	0.810492	0.765488	0.616308	0.403023	0.170012	0.499027	0.590658	0.648115	0.183224	0.150918	0.156381	0.800463	0.142649	0.81079	0.177692	0.197974	0.88393	0.172961	0.200488
7247c753-3a68-488b-8128-313d723ea5ee	92cff9ea-4838-40cf-b541-bcb98c919c3f	590	28	28	2025-08-24T01:22:53.000429Z	0.179062	1.42766	1.10285	1.4621	1.21447	1.43964	1.52554	1.10179	1.73411	1.52144	0.848178	0.172251	0.294604	1.08761	1.35266	0.245468	1.58137	1.56984	0.734659	0.542903	1.44915	0.500756	1.55733	1.69637	0.242388	1.63524	1.46835	1.08754	0.605111	0.234527	0.86082	1.2426	1.21576	0.266619	0.206927	0.243825	1.63838	0.183857	1.67155	0.261953	0.295288	1.76103	0.267894	0.315116
9a5a6fc1-c10b-476e-8056-15507a1d529b	92cff9ea-4838-40cf-b541-bcb98c919c3f	740	28	28	2025-08-24T01:23:09.000429Z	0.138356	0.712265	0.626628	0.716158	0.652711	0.755552	0.761259	0.596385	0.862668	0.771563	0.510764	0.135266	0.174421	0.585506	0.653247	0.147003	0.732216	0.746144	0.395665	0.2828	0.704596	0.314055	0.735979	0.814108	0.177711	0.814071	0.7662	0.61917	0.39774	0.170204	0.50178	0.591583	0.649578	0.183227	0.150601	0.156688	0.799763	0.142641	0.8129	0.177787	0.198399	0.885712	0.171385	0.200334
8834c4df-165c-4fc5-930a-f28e4801af68	92cff9ea-4838-40cf-b541-bcb98c919c3f	590	28	28	2025-08-24T01:42:52.000429Z	0.178953	1.42837	1.11632	1.46754	1.2137	1.44423	1.52738	1.11087	1.72786	1.52506	0.854547	0.17511	0.295583	1.09854	1.36005	0.245156	1.58337	1.57339	0.734131	0.544524	1.44807	0.502209	1.56113	1.71457	0.243369	1.64268	1.4699	1.09749	0.598842	0.234923	0.871392	1.24469	1.22068	0.267067	0.208606	0.247265	1.63522	0.183762	1.68106	0.263058	0.29596	1.76216	0.265053	0.315568
507998bf-8402-48c7-91de-2321670b5875	92cff9ea-4838-40cf-b541-bcb98c919c3f	740	28	28	2025-08-24T01:43:08.000429Z	0.137497	0.713126	0.630474	0.716535	0.651419	0.757841	0.760207	0.598058	0.858186	0.771467	0.513772	0.135021	0.17458	0.590334	0.654959	0.146772	0.731021	0.746411	0.394318	0.279009	0.702883	0.313907	0.733438	0.807953	0.178625	0.816594	0.766014	0.624078	0.393691	0.170183	0.503456	0.59175	0.650744	0.183313	0.151028	0.157326	0.798133	0.142644	0.816016	0.178424	0.198765	0.886012	0.169256	0.200511
7715b96a-98d5-4b5e-891c-5efa966bbb39	92cff9ea-4838-40cf-b541-bcb98c919c3f	590	28	28	2025-08-24T02:02:52.000429Z	0.179399	1.43941	1.1276	1.47055	1.21626	1.46276	1.5267	1.1112	1.72604	1.52504	0.859973	0.172084	0.29587	1.1187	1.36333	0.244748	1.58472	1.56988	0.73138	0.541949	1.44429	0.499447	1.55825	1.70907	0.242553	1.64668	1.46904	1.10187	0.593027	0.235279	0.86824	1.24471	1.22091	0.265861	0.206633	0.244617	1.63576	0.183532	1.68984	0.263258	0.296231	1.75543	0.260466	0.315465
e18b764c-3e2d-458f-8db7-1c5e335b9d7c	92cff9ea-4838-40cf-b541-bcb98c919c3f	740	28	28	2025-08-24T02:03:09.000429Z	0.138405	0.714602	0.636082	0.717045	0.651969	0.761229	0.758983	0.600579	0.854911	0.770691	0.51706	0.136621	0.175081	0.597983	0.653923	0.147107	0.730775	0.743065	0.393251	0.281752	0.699051	0.312903	0.732306	0.81188	0.178111	0.817207	0.765179	0.625189	0.389529	0.170349	0.504244	0.591391	0.650733	0.182972	0.150106	0.155593	0.797361	0.142412	0.817746	0.178663	0.198953	0.882814	0.167612	0.200156
bd1a6c61-094e-4799-b077-88764cf4cb65	92cff9ea-4838-40cf-b541-bcb98c919c3f	590	28	28	2025-08-24T02:22:52.000429Z	0.178252	1.44962	1.13865	1.46676	1.2157	1.4619	1.52664	1.11912	1.72851	1.53293	0.866567	0.17116	0.296845	1.12919	1.37241	0.246854	1.58711	1.57486	0.735645	0.542728	1.44262	0.49824	1.56089	1.70306	0.243218	1.65278	1.47225	1.11321	0.588428	0.235878	0.872377	1.24812	1.2248	0.266859	0.206697	0.245132	1.63913	0.1837	1.70158	0.264318	0.29719	1.74516	0.259652	0.315717
5ba20195-11dd-41da-b196-2cab32ee36ad	92cff9ea-4838-40cf-b541-bcb98c919c3f	740	28	28	2025-08-24T02:23:08.000429Z	0.138644	0.717592	0.639713	0.714211	0.649212	0.761475	0.758225	0.60238	0.853861	0.772044	0.520082	0.134721	0.175099	0.602651	0.657555	0.148366	0.730593	0.744859	0.394024	0.281424	0.697415	0.312724	0.731662	0.809874	0.178869	0.818752	0.765645	0.6309	0.386219	0.170557	0.505326	0.591665	0.652656	0.182925	0.149667	0.157747	0.793342	0.142538	0.820002	0.17921	0.199322	0.877222	0.166283	0.200441
46c463e5-c17a-4bd2-9c89-f9e520b2ba63	92cff9ea-4838-40cf-b541-bcb98c919c3f	590	28	28	2025-08-24T02:42:55.000429Z	0.178816	1.45426	1.15039	1.47412	1.21655	1.48289	1.52589	1.12839	1.73457	1.53748	0.875602	0.174834	0.297939	1.14562	1.37919	0.248327	1.58992	1.57423	0.743232	0.549638	1.44424	0.500185	1.56846	1.71614	0.244523	1.6626	1.47217	1.11016	0.583478	0.236225	0.879699	1.25164	1.23094	0.269328	0.209946	0.251505	1.63666	0.183531	1.71091	0.265283	0.298414	1.73233	0.264885	0.3168
2b94baca-7f09-4e48-9196-a67fcad62ec5	92cff9ea-4838-40cf-b541-bcb98c919c3f	740	28	28	2025-08-24T02:43:11.000429Z	0.138321	0.718003	0.644345	0.715688	0.648771	0.764623	0.757049	0.604761	0.853743	0.771861	0.523064	0.136377	0.175262	0.609477	0.658256	0.148244	0.729741	0.742403	0.397006	0.283455	0.694916	0.312874	0.733313	0.809929	0.178841	0.822525	0.764804	0.629124	0.382891	0.170789	0.509045	0.593708	0.65362	0.183798	0.150303	0.157764	0.795011	0.142245	0.823494	0.179508	0.200134	0.86919	0.169233	0.200599
fb75dec9-1477-4406-a121-dab129919388	92cff9ea-4838-40cf-b541-bcb98c919c3f	590	28	28	2025-08-24T03:02:53.000429Z	0.17762	1.46126	1.16109	1.47652	1.21854	1.48082	1.52752	1.13087	1.73565	1.54315	0.881893	0.171144	0.298671	1.1564	1.38209	0.247779	1.58828	1.57708	0.742211	0.548041	1.44226	0.500773	1.56525	1.70687	0.243809	1.66807	1.4746	1.11704	0.578377	0.236462	0.878656	1.2553	1.23379	0.269325	0.208905	0.249256	1.63998	0.183404	1.7212	0.265364	0.299233	1.7234	0.269214	0.31754
bd80e02f-3822-4c1c-a926-97da72fe9534	92cff9ea-4838-40cf-b541-bcb98c919c3f	740	28	28	2025-08-24T03:03:09.000429Z	0.137827	0.72002	0.649382	0.715516	0.649035	0.765683	0.755703	0.60824	0.853443	0.772883	0.525769	0.134274	0.176377	0.613309	0.659006	0.148232	0.728336	0.742917	0.396811	0.280939	0.693322	0.314884	0.73184	0.811065	0.178787	0.82467	0.765507	0.632968	0.379544	0.171001	0.508781	0.593827	0.655057	0.184245	0.151066	0.15828	0.793374	0.142258	0.826783	0.179718	0.200577	0.861842	0.171018	0.201201
543e3c19-e30f-4fcb-98e7-f5ee23b032fb	92cff9ea-4838-40cf-b541-bcb98c919c3f	590	28	28	2025-08-24T03:22:53.000429Z	0.177945	1.46086	1.17506	1.47654	1.21824	1.49706	1.52781	1.13691	1.73253	1.54523	0.885845	0.170732	0.299844	1.16662	1.38531	0.247764	1.58481	1.5775	0.740165	0.546343	1.43853	0.502398	1.56028	1.70015	0.244089	1.67409	1.47368	1.12446	0.573447	0.236425	0.879786	1.25529	1.23501	0.268882	0.207635	0.245723	1.63996	0.183572	1.72953	0.265883	0.300082	1.71566	0.267634	0.316718
d5128868-4552-4f68-85ab-8d706537e30c	92cff9ea-4838-40cf-b541-bcb98c919c3f	740	28	28	2025-08-24T03:23:09.000429Z	0.137182	0.719769	0.652884	0.713729	0.646863	0.767652	0.754652	0.609987	0.851168	0.77253	0.527364	0.134249	0.176305	0.617906	0.657366	0.148118	0.726697	0.741121	0.395046	0.281048	0.690613	0.316775	0.729293	0.808152	0.17859	0.825202	0.76371	0.63628	0.376205	0.170886	0.507826	0.592357	0.655344	0.184003	0.151471	0.157826	0.790849	0.142355	0.829282	0.180092	0.20075	0.855207	0.170437	0.200885
945414dd-2fe1-4e4f-9b74-48b790d78e35	92cff9ea-4838-40cf-b541-bcb98c919c3f	590	28	28	2025-08-24T03:42:51.000429Z	0.177827	1.46068	1.18431	1.47845	1.21724	1.50048	1.52779	1.14662	1.73554	1.55269	0.891808	0.171037	0.301138	1.1827	1.3939	0.249368	1.58674	1.57875	0.744163	0.551695	1.44123	0.504721	1.57199	1.70682	0.244612	1.68162	1.47869	1.12709	0.570182	0.23735	0.88849	1.26088	1.24108	0.27146	0.209706	0.251039	1.63874	0.183732	1.73864	0.26687	0.301168	1.71297	0.266239	0.317943
5dfde3df-e776-4c3e-a5e9-3c43d28e2d07	92cff9ea-4838-40cf-b541-bcb98c919c3f	740	28	28	2025-08-24T03:43:07.000429Z	0.137161	0.719103	0.656345	0.713958	0.645157	0.767337	0.752929	0.613872	0.850345	0.773591	0.527769	0.13388	0.176787	0.623983	0.660232	0.148816	0.725629	0.741016	0.397638	0.282186	0.689939	0.316431	0.730578	0.808027	0.178875	0.827889	0.765527	0.636394	0.373663	0.171077	0.511276	0.594326	0.657011	0.184666	0.151157	0.15898	0.788649	0.142373	0.831243	0.180538	0.20127	0.850995	0.169083	0.201171
71656d8d-fbbd-4fa2-931c-d1ecaaf78a5d	92cff9ea-4838-40cf-b541-bcb98c919c3f	590	28	28	2025-08-24T04:02:52.000429Z	0.179423	1.46946	1.19721	1.47714	1.21815	1.50653	1.52641	1.1526	1.73622	1.55572	0.898425	0.170356	0.300007	1.19344	1.39857	0.250227	1.58583	1.57513	0.739083	0.548383	1.43623	0.505837	1.56473	1.70116	0.243722	1.68741	1.47429	1.13162	0.566556	0.237042	0.886263	1.25866	1.24004	0.269342	0.20754	0.246544	1.63858	0.183522	1.74591	0.266868	0.300756	1.70819	0.260365	0.317531
e757d04a-7c70-4e2e-9261-30a1c12dc11b	92cff9ea-4838-40cf-b541-bcb98c919c3f	740	28	28	2025-08-24T04:03:08.000429Z	0.138637	0.72184	0.661145	0.712425	0.644497	0.767723	0.752124	0.615788	0.850122	0.77595	0.532575	0.134086	0.175955	0.627855	0.66042	0.14961	0.724311	0.738971	0.394107	0.282597	0.687009	0.318416	0.725813	0.797824	0.179258	0.82871	0.762103	0.637252	0.371068	0.170988	0.50986	0.592722	0.656876	0.183836	0.149606	0.158314	0.787014	0.142329	0.833408	0.180593	0.201002	0.846798	0.166638	0.200714
880a072b-1b6a-4020-94af-9f12935d4569	92cff9ea-4838-40cf-b541-bcb98c919c3f	590	28	28	2025-08-24T04:22:52.000429Z	0.179637	1.46945	1.21226	1.47857	1.21927	1.51047	1.52577	1.16431	1.73918	1.54965	0.903229	0.173369	0.301145	1.21154	1.40504	0.251975	1.58109	1.57613	0.738904	0.552993	1.43522	0.509722	1.56833	1.70941	0.245267	1.70009	1.4761	1.14926	0.567328	0.23726	0.891865	1.25874	1.24585	0.270749	0.210257	0.250276	1.63995	0.183775	1.75178	0.267997	0.301043	1.70637	0.260515	0.318128
b39e1a84-3abf-4df8-bbf7-091c2b99c93e	92cff9ea-4838-40cf-b541-bcb98c919c3f	740	28	28	2025-08-24T04:23:08.000429Z	0.139051	0.723523	0.665176	0.711893	0.643414	0.768778	0.750839	0.620594	0.848868	0.774609	0.532753	0.133905	0.176218	0.635247	0.661438	0.150173	0.721024	0.736458	0.393723	0.28293	0.685418	0.318825	0.726016	0.798183	0.179395	0.831856	0.76314	0.644948	0.370856	0.171121	0.512812	0.593537	0.658236	0.184095	0.149481	0.15874	0.787467	0.142275	0.834865	0.180774	0.201325	0.844807	0.168315	0.200857
860b97a7-5273-4629-b86e-6662a824e614	92cff9ea-4838-40cf-b541-bcb98c919c3f	590	28	28	2025-08-24T04:42:52.000429Z	0.18057	1.47696	1.22459	1.4765	1.21828	1.50941	1.52642	1.17363	1.73597	1.53867	0.913792	0.174252	0.302255	1.22229	1.41257	0.24972	1.57975	1.58364	0.742551	0.54838	1.4345	0.510848	1.57614	1.71679	0.24487	1.70487	1.48016	1.16149	0.567195	0.237688	0.899982	1.26408	1.25046	0.271969	0.211332	0.252493	1.64321	0.183856	1.75667	0.268527	0.301831	1.70733	0.259118	0.317965
6921e499-67ba-4679-8b02-018f0c1996f5	92cff9ea-4838-40cf-b541-bcb98c919c3f	740	28	28	2025-08-24T04:43:08.000429Z	0.139097	0.724051	0.67033	0.709643	0.641932	0.769321	0.749239	0.624479	0.845626	0.767621	0.538934	0.133594	0.176745	0.638916	0.662927	0.149492	0.718178	0.737163	0.395174	0.281866	0.6823	0.319325	0.728658	0.802696	0.178541	0.832958	0.763607	0.649083	0.370385	0.171167	0.514768	0.594354	0.659333	0.184718	0.150948	0.158453	0.788689	0.142155	0.835217	0.181089	0.201649	0.842319	0.166049	0.200749
e8626d3f-a728-4836-96fc-ad13f1e6ff50	92cff9ea-4838-40cf-b541-bcb98c919c3f	590	28	28	2025-08-24T05:02:53.000429Z	0.18254	1.487	1.2389	1.48225	1.21909	1.5156	1.52732	1.17664	1.73917	1.54493	0.914435	0.169789	0.301491	1.23578	1.41791	0.24874	1.581	1.5893	0.742691	0.552102	1.43265	0.513597	1.57725	1.70548	0.243816	1.71186	1.47881	1.16692	0.565547	0.237843	0.895331	1.26444	1.25394	0.270769	0.209644	0.249605	1.65152	0.183787	1.75885	0.269099	0.302307	1.70512	0.260808	0.318291
f3f045e0-cf12-4b50-ad87-0f5592bed852	92cff9ea-4838-40cf-b541-bcb98c919c3f	740	28	28	2025-08-24T05:03:09.000429Z	0.14061	0.727051	0.675338	0.71129	0.641993	0.770661	0.748673	0.627219	0.846026	0.769597	0.537851	0.133647	0.175888	0.644996	0.66379	0.148516	0.716634	0.738372	0.39496	0.28326	0.680931	0.31902	0.727509	0.799275	0.179312	0.835566	0.762456	0.652183	0.369078	0.171311	0.514958	0.594036	0.661056	0.184286	0.149611	0.159124	0.788909	0.142246	0.835525	0.181413	0.201984	0.840462	0.167649	0.200522
f9b4c9f9-b55a-45bf-bf58-feca710eb2bb	92cff9ea-4838-40cf-b541-bcb98c919c3f	590	28	28	2025-08-24T05:22:53.000429Z	0.183475	1.49188	1.25321	1.48049	1.21926	1.52521	1.52744	1.18609	1.73906	1.55145	0.925354	0.170681	0.302118	1.24779	1.42439	0.248396	1.58045	1.58792	0.745969	0.555251	1.43295	0.515707	1.58504	1.71156	0.245201	1.72043	1.48149	1.17788	0.564743	0.237995	0.90431	1.2664	1.25921	0.272002	0.211756	0.252441	1.64912	0.183944	1.75992	0.269596	0.303234	1.70508	0.262841	0.318489
8fa14dc8-ae22-4bfd-b321-f2365831082c	92cff9ea-4838-40cf-b541-bcb98c919c3f	740	28	28	2025-08-24T05:23:09.000429Z	0.141504	0.728541	0.680051	0.709869	0.640495	0.77203	0.747456	0.63031	0.844817	0.771171	0.544441	0.133624	0.176141	0.649414	0.665002	0.147745	0.715826	0.736647	0.395648	0.283677	0.67888	0.32079	0.729072	0.79311	0.17948	0.837007	0.762905	0.657497	0.368128	0.171522	0.516959	0.594422	0.662029	0.184428	0.149933	0.159539	0.78581	0.142263	0.834076	0.181675	0.202385	0.838861	0.168862	0.200662
28d9980a-a9c6-49b8-9f92-bc0be35aca9e	92cff9ea-4838-40cf-b541-bcb98c919c3f	590	28	28	2025-08-24T05:42:52.000429Z	0.185469	1.50003	1.26328	1.48378	1.21871	1.53055	1.52728	1.18707	1.74078	1.5445	0.92522	0.168943	0.303341	1.25565	1.42918	0.245603	1.58106	1.58878	0.745791	0.552589	1.43006	0.514228	1.58181	1.70451	0.243858	1.72179	1.4821	1.17588	0.559174	0.238003	0.900417	1.26733	1.26182	0.271147	0.209567	0.248679	1.65176	0.183836	1.75388	0.269897	0.303926	1.70393	0.259794	0.31791
70250d55-ebc4-4392-ba3a-85bd12abb5f2	92cff9ea-4838-40cf-b541-bcb98c919c3f	740	28	28	2025-08-24T05:43:08.000429Z	0.142056	0.730089	0.685007	0.708991	0.639976	0.772994	0.746883	0.631724	0.843671	0.770336	0.543625	0.13475	0.176264	0.653368	0.665778	0.146335	0.714748	0.73587	0.395807	0.284823	0.675551	0.319494	0.728523	0.797486	0.179084	0.837078	0.762616	0.656654	0.364501	0.171561	0.518531	0.59484	0.661858	0.184321	0.150151	0.15707	0.787282	0.142033	0.830205	0.181637	0.202874	0.837169	0.166899	0.200485
b1e1ee8d-fe80-48a3-8f25-7db9a8cc878f	92cff9ea-4838-40cf-b541-bcb98c919c3f	590	28	28	2025-08-24T06:02:53.000429Z	0.185595	1.50891	1.27424	1.4836	1.21981	1.53752	1.52607	1.19728	1.73968	1.54405	0.937527	0.173899	0.304458	1.26886	1.43518	0.243842	1.5819	1.59001	0.747453	0.553278	1.42877	0.513317	1.59203	1.71538	0.24436	1.72045	1.48389	1.1843	0.55549	0.23849	0.909732	1.26908	1.26812	0.27247	0.212246	0.254558	1.65163	0.183689	1.74796	0.269842	0.304754	1.70459	0.252027	0.318354
74c1cdc9-993d-43d7-bf0b-40b89fb2964a	92cff9ea-4838-40cf-b541-bcb98c919c3f	740	28	28	2025-08-24T06:03:09.000429Z	0.142537	0.732863	0.689117	0.70909	0.639401	0.774822	0.745393	0.636331	0.841971	0.765907	0.550152	0.132945	0.177957	0.658207	0.667066	0.146223	0.714017	0.736011	0.396875	0.283495	0.674875	0.320063	0.731621	0.79697	0.178738	0.837464	0.762917	0.661345	0.361922	0.171759	0.520663	0.5951	0.663699	0.184894	0.151289	0.158749	0.786645	0.142194	0.826077	0.18226	0.203411	0.836183	0.162737	0.200858
b86da6bc-88cb-4943-85ac-b8215ed4b4c1	92cff9ea-4838-40cf-b541-bcb98c919c3f	590	28	28	2025-08-24T06:22:52.000429Z	0.187736	1.52539	1.28207	1.48381	1.21991	1.54295	1.52725	1.20536	1.74165	1.54581	0.937025	0.169843	0.303916	1.2845	1.44066	0.244814	1.5817	1.59186	0.74912	0.557604	1.42986	0.514639	1.58406	1.70541	0.243077	1.72078	1.48257	1.18858	0.551949	0.238888	0.909757	1.27047	1.27674	0.27171	0.211132	0.251731	1.65163	0.183753	1.7378	0.270596	0.305415	1.70365	0.249941	0.318441
f95839ea-256a-49e1-af8c-9f5b7c2b3798	92cff9ea-4838-40cf-b541-bcb98c919c3f	740	28	28	2025-08-24T06:23:08.000429Z	0.143454	0.73736	0.692531	0.707712	0.638164	0.775327	0.744234	0.638672	0.841378	0.765654	0.547945	0.132821	0.177064	0.663455	0.668003	0.146567	0.712416	0.735015	0.396971	0.283614	0.673969	0.320715	0.728937	0.796551	0.17879	0.836807	0.761618	0.662167	0.359196	0.171745	0.521622	0.594511	0.665613	0.184996	0.151608	0.159061	0.784778	0.142088	0.819723	0.182477	0.203603	0.834737	0.161191	0.200578
de31c95e-96a3-4555-a9c2-721d0f1689ff	92cff9ea-4838-40cf-b541-bcb98c919c3f	590	28	28	2025-08-24T06:42:51.000429Z	0.188347	1.52758	1.29061	1.49021	1.21801	1.54834	1.52781	1.21043	1.73956	1.55116	0.94418	0.169736	0.305498	1.30754	1.44729	0.245482	1.58613	1.58299	0.748511	0.561176	1.4318	0.514527	1.59346	1.70582	0.243769	1.71807	1.48513	1.19345	0.548805	0.239034	0.920235	1.27431	1.28555	0.273723	0.211823	0.254452	1.65094	0.184138	1.73411	0.271781	0.306826	1.70479	0.250569	0.31887
7643799e-28e4-4d4c-b1a0-918bc1906780	92cff9ea-4838-40cf-b541-bcb98c919c3f	740	28	28	2025-08-24T06:43:07.000429Z	0.145454	0.738479	0.694372	0.708927	0.636738	0.776864	0.743722	0.642444	0.838613	0.766933	0.551437	0.132969	0.177366	0.671985	0.669735	0.146884	0.713719	0.730647	0.395991	0.286209	0.67376	0.320988	0.731377	0.795423	0.180053	0.834538	0.761948	0.664139	0.356848	0.172001	0.525942	0.595793	0.668831	0.185726	0.152357	0.160739	0.783716	0.142411	0.816313	0.182807	0.204209	0.833782	0.161072	0.200801
6b7c76c1-15cc-4e51-afcb-35e4234c1a29	92cff9ea-4838-40cf-b541-bcb98c919c3f	590	28	28	2025-08-24T07:02:52.000429Z	0.191274	1.52966	1.30295	1.4894	1.21802	1.54883	1.52641	1.21897	1.74302	1.55482	0.949838	0.172801	0.306224	1.31377	1.45185	0.24581	1.58876	1.58389	0.752153	0.563998	1.43009	0.514296	1.59344	1.71539	0.244718	1.71836	1.48368	1.19524	0.548292	0.239002	0.92841	1.27438	1.29178	0.27396	0.212902	0.255636	1.65074	0.183986	1.73049	0.271673	0.306964	1.70366	0.25182	0.319583
24179d15-487e-4446-983e-6a876eb29dcd	92cff9ea-4838-40cf-b541-bcb98c919c3f	740	28	28	2025-08-24T07:03:08.000429Z	0.146259	0.739559	0.698886	0.708329	0.636337	0.776879	0.743143	0.64449	0.838995	0.767673	0.554498	0.134673	0.176665	0.674784	0.670838	0.146617	0.712999	0.729458	0.397311	0.287596	0.671281	0.32086	0.728602	0.791653	0.179253	0.83443	0.760557	0.66551	0.35654	0.171973	0.527303	0.596036	0.669335	0.185351	0.150672	0.158666	0.782901	0.142153	0.812455	0.182852	0.204633	0.832363	0.162115	0.2007
aa4f37bf-7607-4798-a962-b185d9c0dad0	92cff9ea-4838-40cf-b541-bcb98c919c3f	590	28	28	2025-08-24T07:22:53.000429Z	0.192282	1.54124	1.31293	1.49368	1.21767	1.55424	1.52701	1.22421	1.74089	1.55983	0.959107	0.174394	0.306477	1.31666	1.45583	0.243954	1.58637	1.58601	0.753947	0.559158	1.42854	0.51687	1.60048	1.71759	0.244091	1.72247	1.48479	1.19351	0.548142	0.239421	0.931069	1.27536	1.29776	0.273433	0.211191	0.25224	1.65576	0.184088	1.73032	0.272226	0.30783	1.70266	0.25714	0.320119
5e373ea1-1eb9-42bf-8ed5-bb6b5f3298d7	92cff9ea-4838-40cf-b541-bcb98c919c3f	740	28	28	2025-08-24T07:23:09.000429Z	0.14732	0.742149	0.703694	0.708772	0.635369	0.777705	0.742066	0.648448	0.836828	0.768792	0.558725	0.134856	0.177075	0.676274	0.671314	0.145804	0.711152	0.728915	0.39819	0.287216	0.669242	0.322025	0.730006	0.790101	0.179445	0.832788	0.760794	0.664764	0.355849	0.172106	0.52922	0.595574	0.671794	0.185173	0.150833	0.158714	0.782457	0.142149	0.810179	0.183108	0.204922	0.830841	0.164457	0.200645
c30e1e17-024d-4325-8463-d454032a0e6e	92cff9ea-4838-40cf-b541-bcb98c919c3f	590	28	28	2025-08-24T07:42:53.000429Z	0.19425	1.52861	1.3279	1.49514	1.21749	1.55665	1.52708	1.22955	1.74082	1.56015	0.96497	0.173272	0.30732	1.31378	1.45939	0.242776	1.58319	1.58389	0.751379	0.557522	1.42564	0.518843	1.59509	1.71656	0.244703	1.71918	1.48352	1.19555	0.546992	0.239265	0.936988	1.27549	1.29787	0.273923	0.210443	0.245193	1.65622	0.183963	1.73106	0.272849	0.308294	1.70147	0.260392	0.319415
49ccf32e-109c-4cbf-83ed-9194a30bdd28	92cff9ea-4838-40cf-b541-bcb98c919c3f	740	28	28	2025-08-24T07:43:09.000429Z	0.14844	0.742448	0.707714	0.708437	0.634209	0.778432	0.741659	0.650194	0.835768	0.768524	0.562154	0.134306	0.177376	0.67585	0.671502	0.145168	0.708529	0.72695	0.396325	0.286449	0.666454	0.323218	0.728891	0.788348	0.179796	0.831424	0.759062	0.665492	0.355188	0.172095	0.530734	0.593927	0.672462	0.185109	0.150824	0.160389	0.781845	0.142032	0.808879	0.183405	0.205198	0.829492	0.166307	0.200559
8d47934f-f933-48e4-95d4-db8768fa583b	92cff9ea-4838-40cf-b541-bcb98c919c3f	590	28	28	2025-08-24T08:02:53.000429Z	0.196281	1.49615	1.33611	1.5004	1.21613	1.56021	1.52864	1.24249	1.74653	1.56559	0.971257	0.169387	0.307394	1.31574	1.46349	0.242048	1.58638	1.586	0.75188	0.564686	1.42838	0.521187	1.60689	1.70507	0.244448	1.72257	1.47933	1.20375	0.546185	0.239807	0.945786	1.27809	1.30598	0.274722	0.213449	0.255125	1.6519	0.183822	1.73091	0.273857	0.308728	1.70167	0.279155	0.32056
d287659d-1b62-4210-b628-059d9caa7e20	92cff9ea-4838-40cf-b541-bcb98c919c3f	740	28	28	2025-08-24T08:03:09.000429Z	0.149015	0.724677	0.712214	0.709951	0.633657	0.778635	0.740448	0.656425	0.837028	0.770133	0.564831	0.135385	0.180112	0.676029	0.672805	0.144811	0.709072	0.726423	0.396832	0.290067	0.667055	0.323973	0.733548	0.789334	0.179971	0.830673	0.756747	0.669848	0.354742	0.172396	0.535505	0.595613	0.673377	0.186118	0.151954	0.160104	0.779973	0.142051	0.808134	0.183816	0.205468	0.828549	0.175473	0.200763
0919fd9f-61c3-44a5-98b9-1d52cbaf2896	92cff9ea-4838-40cf-b541-bcb98c919c3f	590	28	28	2025-08-24T08:22:53.000429Z	0.197535	1.48852	1.34962	1.501	1.21524	1.56077	1.529	1.24461	1.74216	1.56555	0.979623	0.173602	0.30861	1.32387	1.46763	0.242273	1.5921	1.5976	0.755431	0.564021	1.4273	0.522242	1.61028	1.7183	0.246102	1.72822	1.48069	1.20775	0.542904	0.239914	0.956759	1.28001	1.3116	0.275649	0.212705	0.249576	1.65821	0.184072	1.73113	0.273781	0.309901	1.70086	0.2757	0.320397
35f6eaa4-4cc9-456f-8a88-0c2bbf864c69	92cff9ea-4838-40cf-b541-bcb98c919c3f	740	28	28	2025-08-24T08:23:09.000429Z	0.150033	0.724856	0.716054	0.708647	0.631956	0.777974	0.740204	0.657557	0.833338	0.768585	0.568059	0.134981	0.179945	0.679041	0.673502	0.145048	0.710064	0.730136	0.39863	0.28637	0.665498	0.324463	0.732908	0.788336	0.180201	0.834538	0.756247	0.670829	0.352238	0.172449	0.538786	0.595403	0.674351	0.18605	0.152064	0.160473	0.779181	0.142142	0.806887	0.183936	0.205963	0.827325	0.17391	0.201111
7d4a568c-a94a-4e11-ac93-07dcd246e148	92cff9ea-4838-40cf-b541-bcb98c919c3f	590	28	28	2025-08-24T08:42:50.000429Z	0.200217	1.46755	1.35954	1.50882	1.21406	1.56485	1.53063	1.25562	1.74573	1.57194	0.986188	0.168936	0.309135	1.32337	1.47177	0.242788	1.59324	1.59814	0.757736	0.567884	1.42761	0.524649	1.61154	1.70664	0.245936	1.73039	1.47978	1.21468	0.5401	0.240284	0.964201	1.28162	1.31726	0.276473	0.215306	0.25701	1.65545	0.184065	1.73205	0.274156	0.310444	1.70183	0.273549	0.32138
eb3d7db5-d62f-4305-86d7-e884ab138bf8	92cff9ea-4838-40cf-b541-bcb98c919c3f	740	28	28	2025-08-24T08:43:06.000429Z	0.151045	0.711555	0.719969	0.711611	0.631365	0.778545	0.739617	0.660384	0.833436	0.770728	0.569269	0.131619	0.180608	0.678676	0.674022	0.14491	0.708809	0.728461	0.398571	0.290988	0.66426	0.325231	0.734045	0.786127	0.180544	0.830558	0.754584	0.673025	0.350379	0.17259	0.542075	0.595369	0.676371	0.186378	0.152494	0.160444	0.77866	0.142103	0.805447	0.183707	0.206276	0.826881	0.173562	0.200782
9828a547-6499-4299-965c-dba1ec67b281	92cff9ea-4838-40cf-b541-bcb98c919c3f	590	28	28	2025-08-24T09:02:53.000429Z	0.20143	1.47745	1.37584	1.50757	1.21292	1.56906	1.53008	1.25667	1.74187	1.57239	0.99099	0.167494	0.310306	1.33001	1.47375	0.241998	1.59009	1.5948	0.757096	0.563855	1.42258	0.527357	1.61021	1.7165	0.246811	1.7288	1.47802	1.21801	0.539545	0.240241	0.969946	1.28051	1.3134	0.274115	0.213176	0.253468	1.65434	0.183845	1.7315	0.273499	0.310273	1.69861	0.272796	0.320118
b98865c0-12f1-4a64-9243-9c232b5ac05e	92cff9ea-4838-40cf-b541-bcb98c919c3f	740	28	28	2025-08-24T09:03:09.000429Z	0.152533	0.720645	0.723988	0.709242	0.630203	0.779396	0.739538	0.661417	0.830915	0.770445	0.573638	0.134221	0.178207	0.682385	0.673898	0.144793	0.707201	0.726386	0.397536	0.289197	0.66111	0.326456	0.730433	0.783872	0.181069	0.830765	0.753052	0.674581	0.349681	0.172561	0.543791	0.594465	0.676769	0.185777	0.152153	0.159299	0.77679	0.142025	0.80348	0.183866	0.206233	0.824436	0.172892	0.200671
8ab69f01-0ef6-4ae6-a712-c3843c0778ed	92cff9ea-4838-40cf-b541-bcb98c919c3f	590	28	28	2025-08-24T09:22:53.000429Z	0.204354	1.45844	1.38502	1.51165	1.21249	1.56763	1.53252	1.26436	1.7462	1.57623	0.99742	0.167513	0.310339	1.33307	1.47883	0.24246	1.58805	1.59648	0.759809	0.567271	1.42279	0.528366	1.61277	1.7049	0.246741	1.73137	1.47971	1.22744	0.542374	0.240887	0.979081	1.28331	1.3148	0.275388	0.214774	0.255216	1.65082	0.184157	1.73078	0.275349	0.311091	1.70078	0.272255	0.321482
6c7774a9-aaf5-4864-9bb0-19da790fde5a	92cff9ea-4838-40cf-b541-bcb98c919c3f	740	28	28	2025-08-24T09:23:09.000429Z	0.153824	0.710354	0.727897	0.710741	0.629742	0.777376	0.739323	0.664364	0.831586	0.771321	0.576209	0.134056	0.17864	0.683424	0.67517	0.144767	0.70469	0.725224	0.398605	0.289361	0.661155	0.326129	0.731927	0.782695	0.181776	0.829495	0.752802	0.678642	0.35076	0.172839	0.546693	0.594475	0.676564	0.185877	0.151992	0.159841	0.775264	0.141983	0.802057	0.184506	0.206451	0.824746	0.171901	0.201009
8bc8e090-f5ad-468d-94da-b0780ab27d27	92cff9ea-4838-40cf-b541-bcb98c919c3f	590	28	28	2025-08-24T09:42:50.000429Z	0.205907	1.44434	1.39384	1.51559	1.21166	1.56804	1.53358	1.26144	1.74331	1.57746	1.00414	0.167723	0.31036	1.33519	1.48203	0.244904	1.58485	1.59784	0.762692	0.56679	1.42165	0.528765	1.61456	1.70722	0.247492	1.72601	1.47665	1.23122	0.537239	0.240838	0.983806	1.28169	1.31908	0.27535	0.214787	0.254585	1.65414	0.184098	1.73052	0.276554	0.311249	1.69946	0.272218	0.321277
35dbb7c6-31f6-4b00-80db-fa7de7783da6	92cff9ea-4838-40cf-b541-bcb98c919c3f	740	28	28	2025-08-24T09:43:06.000429Z	0.153762	0.705469	0.730094	0.710869	0.628537	0.77677	0.738353	0.664275	0.829288	0.771277	0.580951	0.131453	0.179523	0.683474	0.675474	0.145754	0.703336	0.725075	0.399853	0.285951	0.658712	0.326891	0.733715	0.783203	0.181572	0.827311	0.751109	0.679806	0.347464	0.172837	0.549185	0.594187	0.676413	0.186414	0.153105	0.160607	0.774658	0.141972	0.800341	0.185541	0.206599	0.823014	0.172139	0.201123
d90bed04-ca44-41bb-af9a-333e0bbf4ee5	92cff9ea-4838-40cf-b541-bcb98c919c3f	590	28	28	2025-08-24T10:02:53.000429Z	0.206732	1.42244	1.4028	1.5164	1.21095	1.57464	1.53573	1.26478	1.74739	1.58081	1.00949	0.166638	0.311944	1.3357	1.48512	0.247254	1.58431	1.5947	0.761601	0.563827	1.41921	0.527344	1.61492	1.70163	0.248661	1.72239	1.47814	1.2348	0.53938	0.240904	0.992087	1.28286	1.32098	0.274806	0.2127	0.252112	1.65566	0.183698	1.73151	0.276661	0.311382	1.69795	0.270612	0.321096
91bda588-e8fe-4f9e-a364-76ff18fb4ed4	92cff9ea-4838-40cf-b541-bcb98c919c3f	740	28	28	2025-08-24T10:03:09.000429Z	0.155362	0.691986	0.736276	0.711178	0.627814	0.777984	0.738694	0.666153	0.830217	0.77195	0.583957	0.131354	0.179845	0.684052	0.676056	0.147419	0.701456	0.723137	0.399316	0.286009	0.657064	0.327501	0.733115	0.781929	0.18189	0.824316	0.751176	0.680634	0.348419	0.172766	0.550931	0.593184	0.676828	0.186278	0.153142	0.160259	0.773807	0.141899	0.799618	0.185882	0.206691	0.821351	0.171193	0.200911
6aa9d515-f31e-478f-bc8d-7769802a31ea	92cff9ea-4838-40cf-b541-bcb98c919c3f	590	28	28	2025-08-24T10:22:53.000429Z	0.209531	1.41474	1.41392	1.52067	1.20943	1.57588	1.53733	1.27161	1.74167	1.58493	1.0158	0.172513	0.312916	1.34604	1.491	0.250447	1.58784	1.58953	0.760835	0.565773	1.42001	0.526996	1.62396	1.71706	0.251265	1.71762	1.4805	1.2439	0.544018	0.241102	1.00288	1.28515	1.32637	0.2773	0.217808	0.259423	1.65425	0.18397	1.73133	0.27718	0.31218	1.70045	0.270853	0.321603
17c01ef5-d08b-48c7-aa66-4226305e5986	92cff9ea-4838-40cf-b541-bcb98c919c3f	740	28	28	2025-08-24T10:23:09.000429Z	0.157022	0.694673	0.738246	0.711968	0.626304	0.776847	0.738982	0.669013	0.826458	0.772354	0.584387	0.132169	0.179051	0.688312	0.677506	0.149121	0.701618	0.719768	0.398662	0.289293	0.657264	0.325974	0.733686	0.779557	0.183611	0.821711	0.750829	0.684298	0.350353	0.173046	0.554725	0.593638	0.678211	0.186729	0.152004	0.160043	0.773801	0.141749	0.797599	0.185871	0.207171	0.822016	0.171147	0.201084
ae4234f7-fc6d-475a-b850-e35344c70427	92cff9ea-4838-40cf-b541-bcb98c919c3f	590	28	28	2025-08-24T10:42:52.000429Z	0.212002	1.40691	1.41991	1.52457	1.20853	1.57985	1.54013	1.27622	1.74792	1.59003	1.02376	0.166949	0.312751	1.35139	1.49362	0.251089	1.5921	1.59117	0.759945	0.568682	1.4186	0.528672	1.62146	1.70267	0.250703	1.71771	1.47889	1.2485	0.553271	0.240882	1.00909	1.2843	1.33233	0.276493	0.215678	0.254986	1.65671	0.183865	1.73095	0.277431	0.312078	1.69911	0.273102	0.32209
bd363617-79e1-4e07-997a-21d819f6cbc8	92cff9ea-4838-40cf-b541-bcb98c919c3f	740	28	28	2025-08-24T10:43:08.000429Z	0.157959	0.686241	0.741762	0.712901	0.62551	0.776707	0.739145	0.671081	0.828139	0.774429	0.589935	0.133842	0.178834	0.690906	0.677998	0.14933	0.702705	0.71903	0.397659	0.289888	0.654257	0.326964	0.733205	0.778522	0.183746	0.818297	0.749486	0.685742	0.355943	0.172857	0.557164	0.593726	0.677745	0.187112	0.152192	0.159886	0.772831	0.141778	0.796186	0.185678	0.207179	0.820245	0.173023	0.200968
19e1f4bc-3abb-4a10-93e2-4f6a15758de2	92cff9ea-4838-40cf-b541-bcb98c919c3f	590	28	28	2025-08-24T11:02:53.000429Z	0.213128	1.39752	1.42962	1.525	1.20613	1.5827	1.54212	1.28763	1.74376	1.59154	1.02726	0.171605	0.314363	1.36163	1.4974	0.251119	1.59316	1.59258	0.762202	0.56687	1.41894	0.529825	1.62794	1.70772	0.252996	1.71227	1.47734	1.2559	0.553672	0.241538	1.03173	1.28758	1.34002	0.278349	0.217649	0.25863	1.65562	0.183895	1.73057	0.27753	0.312538	1.69891	0.267942	0.322466
f808352e-106d-4602-8df8-aec81dc63a64	92cff9ea-4838-40cf-b541-bcb98c919c3f	740	28	28	2025-08-24T11:03:09.000429Z	0.158806	0.684391	0.744332	0.712072	0.623811	0.777219	0.737521	0.675888	0.825363	0.774037	0.588675	0.13465	0.178726	0.694541	0.679581	0.149298	0.702367	0.717866	0.398888	0.291999	0.654282	0.327221	0.734656	0.778608	0.184018	0.815072	0.748411	0.689337	0.355769	0.173154	0.562906	0.593927	0.679251	0.187927	0.153012	0.161396	0.772262	0.141889	0.794428	0.185907	0.207455	0.818796	0.170744	0.201245
576a0ca3-04bc-4787-8f33-078a530f66a1	92cff9ea-4838-40cf-b541-bcb98c919c3f	590	28	28	2025-08-24T11:22:53.000429Z	0.215231	1.39202	1.44124	1.52968	1.20608	1.58674	1.54266	1.28987	1.74813	1.60177	1.03314	0.172445	0.314776	1.36759	1.50017	0.249186	1.58978	1.59814	0.762175	0.566703	1.4178	0.529839	1.62959	1.71275	0.253038	1.71216	1.47719	1.25907	0.552061	0.24132	1.02894	1.28363	1.34204	0.278504	0.218355	0.25921	1.65944	0.184023	1.73119	0.277492	0.312409	1.69853	0.265512	0.322095
f4d2a54e-ffcc-406f-acbc-9cc12a4df2f0	92cff9ea-4838-40cf-b541-bcb98c919c3f	740	28	28	2025-08-24T11:23:09.000429Z	0.16054	0.683461	0.746538	0.713719	0.622811	0.778173	0.738094	0.677195	0.826217	0.777645	0.592624	0.131438	0.179581	0.696473	0.67952	0.14842	0.70025	0.720098	0.398889	0.288191	0.653613	0.329384	0.732504	0.771013	0.184967	0.813439	0.747233	0.689962	0.354223	0.173155	0.56443	0.592542	0.67946	0.187296	0.152117	0.161952	0.771477	0.141929	0.793149	0.18603	0.207217	0.818473	0.168644	0.201195
29665066-c6f6-4fd9-af58-c663c07093fd	92cff9ea-4838-40cf-b541-bcb98c919c3f	590	28	28	2025-08-24T11:42:52.000429Z	0.218531	1.39238	1.44634	1.53299	1.20513	1.59301	1.54511	1.29605	1.74366	1.60148	1.04119	0.167537	0.313306	1.37399	1.50337	0.248647	1.58882	1.60234	0.762199	0.569789	1.41957	0.531541	1.6317	1.70674	0.25208	1.71072	1.47866	1.26586	0.547867	0.241936	1.03971	1.2878	1.34891	0.278441	0.216681	0.256353	1.66031	0.184209	1.73041	0.278608	0.312929	1.69919	0.268529	0.322598
febcf608-77a3-4e56-aad1-fafd84aaf79a	92cff9ea-4838-40cf-b541-bcb98c919c3f	740	28	28	2025-08-24T11:43:08.000429Z	0.161689	0.682158	0.748791	0.713425	0.622071	0.779595	0.738006	0.680462	0.823213	0.776918	0.595825	0.131628	0.179441	0.698537	0.680196	0.14805	0.699084	0.720461	0.397734	0.288416	0.652919	0.32927	0.733837	0.771096	0.185182	0.811577	0.747565	0.692215	0.352024	0.173173	0.567712	0.592513	0.680548	0.188254	0.154601	0.16231	0.771225	0.141869	0.79196	0.186463	0.207509	0.817244	0.169314	0.201057
91dbccff-709d-4202-9b6e-d5a6bc6d474c	92cff9ea-4838-40cf-b541-bcb98c919c3f	590	28	28	2025-08-24T12:02:53.000429Z	0.220197	1.38524	1.45655	1.53248	1.20298	1.59081	1.54598	1.30359	1.74954	1.60759	1.04272	0.166012	0.315312	1.37886	1.50815	0.245871	1.58753	1.6016	0.766996	0.56997	1.41913	0.531731	1.63483	1.71687	0.254254	1.7116	1.47894	1.27442	0.549224	0.241763	1.05366	1.28943	1.35605	0.280672	0.216973	0.25215	1.66229	0.183964	1.73107	0.279145	0.31347	1.69921	0.26753	0.322435
ba92e367-3107-48c1-b807-18733ff3b166	92cff9ea-4838-40cf-b541-bcb98c919c3f	740	28	28	2025-08-24T12:03:09.000429Z	0.163256	0.681127	0.750685	0.713197	0.620683	0.777453	0.737705	0.683118	0.824617	0.778425	0.59259	0.131137	0.179983	0.700928	0.681632	0.146777	0.697283	0.718943	0.39952	0.288792	0.651573	0.329242	0.734797	0.777299	0.186246	0.810488	0.746934	0.69518	0.352664	0.17327	0.572719	0.592913	0.68228	0.188598	0.154741	0.162485	0.772271	0.141734	0.790586	0.187235	0.207846	0.81631	0.170466	0.201271
269cf794-0fa7-45d5-adc8-423f0d40d3db	92cff9ea-4838-40cf-b541-bcb98c919c3f	590	28	28	2025-08-24T12:22:53.000429Z	0.222888	1.37072	1.46222	1.53687	1.20206	1.58818	1.54873	1.30532	1.74735	1.61031	1.05133	0.167688	0.314673	1.38637	1.51055	0.245195	1.58841	1.60122	0.771114	0.570856	1.41966	0.534582	1.63243	1.70825	0.253916	1.71142	1.47933	1.27766	0.551482	0.242106	1.05852	1.28878	1.36153	0.279579	0.218044	0.257527	1.66763	0.184104	1.73058	0.279635	0.313744	1.70031	0.268123	0.322814
104c9be3-ee24-483c-817d-39cdffa37d79	92cff9ea-4838-40cf-b541-bcb98c919c3f	740	28	28	2025-08-24T12:23:09.000429Z	0.164515	0.669024	0.754469	0.714096	0.619906	0.775443	0.738033	0.685172	0.822875	0.779766	0.596177	0.134402	0.178689	0.704724	0.682014	0.146109	0.69669	0.717571	0.400848	0.290939	0.650164	0.329639	0.732945	0.774887	0.185214	0.808473	0.746834	0.695942	0.353907	0.173158	0.574765	0.592237	0.682796	0.188421	0.154141	0.160905	0.773193	0.141661	0.788733	0.187279	0.207985	0.816136	0.170827	0.200948
dde26b6e-e58f-40e0-8025-e8ff6e086d45	92cff9ea-4838-40cf-b541-bcb98c919c3f	590	28	28	2025-08-24T12:42:50.000429Z	0.227495	1.37884	1.46923	1.53747	1.20047	1.59081	1.54898	1.31466	1.75142	1.61493	1.05633	0.167163	0.315132	1.3919	1.51491	0.244291	1.58996	1.60248	0.771806	0.573033	1.42228	0.537034	1.63833	1.7077	0.254367	1.71681	1.47813	1.285	0.551606	0.242374	1.07051	1.29112	1.36961	0.280473	0.219374	0.259012	1.66824	0.184109	1.73022	0.280118	0.314439	1.70198	0.271209	0.323396
160d1b66-c075-4d0d-b055-ab6503dd027f	92cff9ea-4838-40cf-b541-bcb98c919c3f	740	28	28	2025-08-24T12:43:06.000429Z	0.165589	0.67425	0.754894	0.713786	0.618573	0.775179	0.737819	0.686729	0.823057	0.781885	0.597438	0.130917	0.182242	0.70597	0.683025	0.145973	0.696205	0.716753	0.401314	0.288671	0.651022	0.330617	0.734827	0.775114	0.185366	0.80939	0.745935	0.697622	0.353532	0.173264	0.577913	0.592171	0.684939	0.189419	0.154957	0.16259	0.77248	0.141846	0.787404	0.187808	0.208141	0.81516	0.173042	0.201301
10bd25b7-0b7a-4642-93f9-41af4880c99d	92cff9ea-4838-40cf-b541-bcb98c919c3f	590	28	28	2025-08-24T13:02:53.000429Z	0.230946	1.34512	1.47867	1.53781	1.19907	1.5874	1.55029	1.31707	1.74759	1.6085	1.05897	0.171604	0.317997	1.39958	1.51723	0.243786	1.59236	1.59736	0.765662	0.567322	1.4219	0.539176	1.64024	1.71917	0.257235	1.71748	1.47835	1.29233	0.55063	0.241908	1.08188	1.28975	1.37611	0.280137	0.220683	0.259775	1.66574	0.183912	1.72916	0.28036	0.31464	1.70325	0.274847	0.322448
eba9ad7a-bb2b-4554-9e97-89b39f3c3548	92cff9ea-4838-40cf-b541-bcb98c919c3f	740	28	28	2025-08-24T13:03:09.000429Z	0.168726	0.653755	0.758558	0.713737	0.617608	0.774052	0.73836	0.687755	0.821227	0.781925	0.599154	0.133822	0.179504	0.709591	0.684028	0.14539	0.696042	0.713385	0.398413	0.291197	0.649476	0.331002	0.733131	0.774323	0.186596	0.809708	0.745881	0.701056	0.353033	0.173161	0.581342	0.591875	0.686135	0.188901	0.154649	0.160911	0.771628	0.141799	0.785807	0.187363	0.208551	0.815906	0.174441	0.200897
23cb1f56-8117-4a8e-97fb-997b5f85522d	92cff9ea-4838-40cf-b541-bcb98c919c3f	590	28	28	2025-08-24T13:22:52.000429Z	0.234629	1.37427	1.48481	1.53957	1.19911	1.57445	1.54999	1.31933	1.7532	1.60253	1.06438	0.172298	0.317686	1.40381	1.52101	0.241403	1.59258	1.59561	0.765034	0.56941	1.41969	0.537836	1.64136	1.71964	0.256923	1.72074	1.47745	1.29669	0.551932	0.241831	1.08329	1.28915	1.37942	0.278931	0.217723	0.25588	1.66565	0.183912	1.72861	0.279935	0.315424	1.7013	0.27368	0.322245
a01dc3d7-86e3-42cc-80a2-c82fe5913b35	92cff9ea-4838-40cf-b541-bcb98c919c3f	740	28	28	2025-08-24T13:23:08.000429Z	0.170828	0.673273	0.759981	0.713782	0.617172	0.767658	0.738422	0.690858	0.822718	0.776853	0.601662	0.133583	0.179102	0.711991	0.684547	0.144333	0.695417	0.712124	0.39809	0.291857	0.648435	0.331156	0.732547	0.773126	0.187249	0.808836	0.744159	0.702634	0.354216	0.173254	0.583963	0.591632	0.687038	0.189016	0.155122	0.160897	0.770642	0.141652	0.784201	0.187014	0.208964	0.814809	0.174868	0.200813
cc226a31-224c-40ea-9d67-e79c64d0d9d6	92cff9ea-4838-40cf-b541-bcb98c919c3f	590	28	28	2025-08-24T13:42:52.000429Z	0.239274	1.35312	1.49019	1.53985	1.19638	1.56674	1.54877	1.32479	1.75116	1.60185	1.06987	0.167617	0.316151	1.41282	1.52439	0.240931	1.59367	1.59618	0.77034	0.574225	1.41932	0.538706	1.6422	1.71773	0.256903	1.72325	1.47978	1.30364	0.558937	0.242322	1.09353	1.29075	1.38712	0.279561	0.220763	0.258555	1.66749	0.183799	1.7284	0.279364	0.31574	1.70317	0.273773	0.323017
bc04e0f3-8886-4b2b-ac2f-ed662adff14d	92cff9ea-4838-40cf-b541-bcb98c919c3f	740	28	28	2025-08-24T13:43:08.000429Z	0.173019	0.662251	0.762648	0.713371	0.615556	0.763208	0.737336	0.691648	0.820789	0.776899	0.603866	0.133945	0.179143	0.71502	0.685332	0.143902	0.695223	0.711114	0.399731	0.292073	0.646726	0.330918	0.732645	0.772807	0.18766	0.809628	0.745358	0.703159	0.357273	0.173186	0.586914	0.591158	0.688432	0.188876	0.155028	0.160938	0.770015	0.141474	0.782456	0.186754	0.209031	0.814393	0.173259	0.200715
6d257b03-ee43-4ac1-a11a-b6916e65bfe7	92cff9ea-4838-40cf-b541-bcb98c919c3f	590	28	28	2025-08-24T14:02:52.000429Z	0.243049	1.35764	1.49764	1.54153	1.19601	1.54896	1.54987	1.32821	1.75567	1.60015	1.06973	0.170781	0.319448	1.42282	1.52499	0.241122	1.59235	1.59892	0.768747	0.577086	1.4174	0.539147	1.64489	1.71723	0.259086	1.72291	1.48059	1.31053	0.562048	0.241713	1.10265	1.28903	1.39223	0.279732	0.221985	0.259216	1.66853	0.183525	1.72713	0.280168	0.315876	1.70015	0.270088	0.322319
7476b58c-4122-4644-80e7-c88d6e052587	92cff9ea-4838-40cf-b541-bcb98c919c3f	740	28	28	2025-08-24T14:03:08.000429Z	0.175671	0.664734	0.763536	0.714307	0.614807	0.7588	0.736763	0.69528	0.822039	0.776511	0.603684	0.130721	0.180577	0.716917	0.685497	0.14409	0.693767	0.711363	0.399102	0.288545	0.645639	0.331968	0.7318	0.765904	0.189345	0.808844	0.744966	0.706193	0.359257	0.173167	0.588991	0.590478	0.689557	0.189161	0.156937	0.162499	0.769107	0.141484	0.781281	0.187573	0.209265	0.812895	0.172042	0.200859
72bacfe0-774e-4835-a0e4-e52b60662cb7	92cff9ea-4838-40cf-b541-bcb98c919c3f	590	28	28	2025-08-24T14:22:52.000429Z	0.246685	1.34561	1.50378	1.53976	1.19424	1.53026	1.54809	1.33573	1.75473	1.60242	1.08923	0.166694	0.318948	1.42952	1.53037	0.240941	1.59413	1.6067	0.769497	0.57691	1.41644	0.538086	1.65058	1.72711	0.259483	1.72665	1.48099	1.31993	0.559717	0.242491	1.10833	1.2912	1.39756	0.279901	0.222175	0.260061	1.67437	0.183756	1.7276	0.281277	0.317027	1.70324	0.265502	0.323991
785a3540-57ef-483b-8796-123a1be50a62	92cff9ea-4838-40cf-b541-bcb98c919c3f	740	28	28	2025-08-24T14:23:08.000429Z	0.177626	0.658674	0.766321	0.712489	0.613493	0.747238	0.736	0.698601	0.820307	0.7762	0.608761	0.131437	0.180764	0.719739	0.686676	0.14403	0.69381	0.714004	0.399056	0.291377	0.644723	0.3317	0.733254	0.76751	0.189663	0.808111	0.744199	0.708584	0.357735	0.173407	0.592538	0.590751	0.691099	0.189002	0.154969	0.164371	0.769583	0.141475	0.780186	0.188183	0.2096	0.813126	0.170366	0.20118
5c330e83-0757-4abf-86e2-91f4141dc4c2	92cff9ea-4838-40cf-b541-bcb98c919c3f	590	28	28	2025-08-24T14:42:52.000429Z	0.250618	1.35406	1.5129	1.54064	1.19442	1.52836	1.54854	1.3415	1.75753	1.60464	1.10314	0.171231	0.320803	1.4324	1.53026	0.240865	1.5938	1.61033	0.77434	0.57753	1.41331	0.537836	1.64666	1.7184	0.259858	1.72923	1.48202	1.32284	0.550947	0.24231	1.12009	1.29076	1.40276	0.279601	0.222528	0.258282	1.67441	0.18373	1.72636	0.281924	0.316677	1.70238	0.26732	0.322719
9cee7013-1d86-460f-a79d-2d5d4fd36d37	92cff9ea-4838-40cf-b541-bcb98c919c3f	740	28	28	2025-08-24T14:43:08.000429Z	0.17908	0.660687	0.769602	0.71319	0.613422	0.746373	0.736357	0.700049	0.821009	0.77669	0.615712	0.133579	0.179947	0.721125	0.687068	0.143566	0.691828	0.713303	0.399985	0.291447	0.642179	0.331382	0.732925	0.76942	0.188486	0.80903	0.744818	0.709236	0.352301	0.173155	0.595023	0.589851	0.690672	0.188527	0.15597	0.160649	0.770645	0.14132	0.778081	0.188171	0.209604	0.811085	0.169718	0.200667
4a6becd5-360c-46f3-9207-f6848cd2cd09	92cff9ea-4838-40cf-b541-bcb98c919c3f	590	28	28	2025-08-24T15:02:53.000429Z	0.254402	1.33861	1.5177	1.54314	1.19119	1.53435	1.5455	1.34418	1.75531	1.59858	1.11128	0.167662	0.318969	1.43879	1.53441	0.239787	1.59389	1.60695	0.777806	0.581627	1.41739	0.540633	1.65318	1.72446	0.259637	1.72924	1.48329	1.33647	0.549482	0.242808	1.12701	1.29426	1.40713	0.281152	0.22372	0.261841	1.67746	0.183706	1.72655	0.283086	0.317686	1.70467	0.266543	0.324208
c2da26ab-41a9-4a27-9e39-939daa675425	92cff9ea-4838-40cf-b541-bcb98c919c3f	740	28	28	2025-08-24T15:03:09.000429Z	0.180151	0.65244	0.772581	0.712987	0.611314	0.749421	0.734352	0.701553	0.818842	0.774361	0.618507	0.130949	0.183286	0.722649	0.68832	0.14318	0.692376	0.711564	0.402055	0.295513	0.643212	0.331753	0.73601	0.772696	0.188032	0.807747	0.744797	0.713815	0.351412	0.173473	0.59955	0.590871	0.692926	0.189608	0.157341	0.163698	0.77088	0.14153	0.777065	0.189146	0.210072	0.812182	0.171663	0.201113
d8bead33-aecd-486b-8e95-e16a5bce8973	92cff9ea-4838-40cf-b541-bcb98c919c3f	590	28	28	2025-08-24T15:22:52.000429Z	0.256223	1.35139	1.52475	1.54441	1.19207	1.50796	1.54605	1.34832	1.76005	1.59777	1.10366	0.166877	0.319593	1.44289	1.53612	0.239027	1.59419	1.60276	0.77509	0.577771	1.41398	0.541273	1.65017	1.71362	0.258051	1.72319	1.48061	1.33959	0.557454	0.242479	1.12747	1.29106	1.40639	0.279603	0.223407	0.258755	1.67536	0.183694	1.72595	0.283153	0.317303	1.70275	0.271676	0.32362
28ede172-e7a7-40e6-9ed1-19e22c28f91c	92cff9ea-4838-40cf-b541-bcb98c919c3f	740	28	28	2025-08-24T15:23:09.000429Z	0.181567	0.658679	0.774836	0.713151	0.611246	0.739125	0.734934	0.703897	0.820824	0.77403	0.618024	0.133773	0.179805	0.726027	0.688517	0.142541	0.690894	0.708525	0.400789	0.292974	0.6408	0.332235	0.733885	0.769883	0.187941	0.802193	0.743039	0.715151	0.355613	0.173418	0.600274	0.589912	0.69162	0.188995	0.156684	0.161298	0.768986	0.14132	0.775581	0.188635	0.20994	0.810251	0.172626	0.200736
d2c0d374-cce2-4904-b7a7-4438f48d86be	92cff9ea-4838-40cf-b541-bcb98c919c3f	590	28	28	2025-08-24T15:42:52.000429Z	0.25704	1.33579	1.53396	1.54135	1.19023	1.50682	1.54301	1.35387	1.75867	1.59611	1.10685	0.171608	0.322761	1.45148	1.53752	0.238102	1.59577	1.60416	0.771505	0.572323	1.41367	0.541125	1.65411	1.7265	0.259598	1.71757	1.4821	1.34569	0.552644	0.242894	1.1419	1.2923	1.41313	0.280287	0.225582	0.260797	1.67921	0.183688	1.72647	0.282817	0.317406	1.70343	0.272141	0.323495
548bca18-47e4-46bc-8f36-f1d9022bdfcd	92cff9ea-4838-40cf-b541-bcb98c919c3f	740	28	28	2025-08-24T15:43:08.000429Z	0.181839	0.650301	0.777398	0.711842	0.609912	0.73604	0.733274	0.707382	0.818907	0.773175	0.618234	0.130074	0.18373	0.726664	0.689081	0.141883	0.690779	0.709054	0.398873	0.294293	0.640647	0.332889	0.734909	0.771454	0.187306	0.798529	0.743868	0.717526	0.353261	0.17339	0.602617	0.589488	0.692866	0.189048	0.157551	0.162048	0.769726	0.141237	0.774746	0.18839	0.209918	0.809978	0.174148	0.201058
e663e784-2896-4a1f-8ae5-4d65398a9722	92cff9ea-4838-40cf-b541-bcb98c919c3f	590	28	28	2025-08-24T16:02:53.000429Z	0.258044	1.35134	1.54113	1.54121	1.18941	1.50979	1.54255	1.3549	1.75945	1.59323	1.1182	0.171518	0.32277	1.45374	1.54198	0.235981	1.596	1.60762	0.768856	0.573108	1.41137	0.542043	1.65472	1.72504	0.258856	1.71532	1.48265	1.35163	0.554037	0.242676	1.1469	1.29132	1.41973	0.279462	0.226055	0.26101	1.68067	0.18336	1.72634	0.282407	0.317131	1.70424	0.270233	0.323178
35055d97-9d44-4e88-a300-101a042f5c60	92cff9ea-4838-40cf-b541-bcb98c919c3f	740	28	28	2025-08-24T16:03:09.000429Z	0.182763	0.659029	0.778739	0.712099	0.60928	0.73723	0.733428	0.707602	0.818577	0.771852	0.622095	0.133245	0.180444	0.729394	0.689018	0.141042	0.689578	0.708667	0.397626	0.292982	0.638908	0.332765	0.734143	0.76843	0.187952	0.796992	0.743344	0.719197	0.35371	0.173342	0.603476	0.589248	0.693723	0.188662	0.15685	0.164065	0.767887	0.141338	0.7733	0.188458	0.209932	0.809749	0.171731	0.200817
c7b3aa95-f56e-4026-b1ae-f0d161b8e296	92cff9ea-4838-40cf-b541-bcb98c919c3f	590	28	28	2025-08-24T16:22:53.000429Z	0.258195	1.33199	1.54993	1.54245	1.18796	1.50515	1.54153	1.35688	1.75806	1.59014	1.12839	0.165204	0.32224	1.46079	1.54602	0.234895	1.59606	1.61181	0.774647	0.57816	1.41282	0.543708	1.65513	1.71744	0.256895	1.71644	1.48568	1.36149	0.550578	0.243304	1.15413	1.29456	1.41845	0.278502	0.223938	0.257683	1.68187	0.183473	1.72755	0.282751	0.318191	1.70694	0.268841	0.32319
f723e6ad-4198-4bd3-a4aa-a50c502a2ddc	92cff9ea-4838-40cf-b541-bcb98c919c3f	740	28	28	2025-08-24T16:23:09.000429Z	0.182559	0.648859	0.782143	0.71183	0.608731	0.737398	0.732802	0.709641	0.817374	0.769734	0.626357	0.130141	0.183601	0.7307	0.690251	0.140153	0.689458	0.709716	0.399719	0.294851	0.638797	0.333697	0.736737	0.770974	0.188668	0.797527	0.744237	0.721654	0.351698	0.173369	0.607059	0.588679	0.692179	0.188926	0.158561	0.162812	0.768123	0.141126	0.772506	0.188923	0.209847	0.810154	0.170683	0.201133
dd0d0b5f-1704-4307-b4d9-3134f7cd13e4	92cff9ea-4838-40cf-b541-bcb98c919c3f	590	28	28	2025-08-24T16:42:50.000429Z	0.258891	1.342	1.55376	1.54419	1.18677	1.49363	1.53939	1.36492	1.762	1.58713	1.13436	0.167	0.32207	1.46678	1.54577	0.233912	1.59751	1.61359	0.775516	0.58655	1.41677	0.546362	1.66177	1.72824	0.256465	1.71888	1.48454	1.3647	0.546227	0.244125	1.16244	1.29658	1.42197	0.280362	0.228154	0.262807	1.68138	0.183697	1.72734	0.283934	0.318926	1.70978	0.26644	0.325097
c0a7e7b8-0921-433e-9df6-b2b7e0941520	92cff9ea-4838-40cf-b541-bcb98c919c3f	740	28	28	2025-08-24T16:43:06.000429Z	0.183037	0.655431	0.78257	0.711692	0.607253	0.730425	0.731648	0.713052	0.817998	0.767474	0.627728	0.130966	0.181106	0.73319	0.690795	0.139324	0.688974	0.709763	0.399875	0.293403	0.639776	0.334163	0.736461	0.764917	0.188145	0.796164	0.742709	0.723567	0.349881	0.173574	0.610178	0.589051	0.693471	0.188644	0.157074	0.164786	0.766306	0.141093	0.771399	0.189169	0.210194	0.810678	0.171055	0.20122
df33c1d3-4365-4a9a-93b3-ba82e8cec292	92cff9ea-4838-40cf-b541-bcb98c919c3f	590	28	28	2025-08-24T17:02:51.000429Z	0.257911	1.33651	1.56182	1.54481	1.18658	1.49878	1.53829	1.36901	1.7619	1.58221	1.1405	0.171246	0.325117	1.46992	1.54537	0.232989	1.59744	1.61283	0.777824	0.587645	1.4146	0.54744	1.66095	1.7291	0.258156	1.7201	1.48386	1.36618	0.546073	0.243087	1.1741	1.29534	1.4208	0.27884	0.228643	0.261562	1.67957	0.183326	1.72659	0.283748	0.318039	1.70908	0.263754	0.323644
e456ea78-0a8e-4016-bc96-4501f9cc362f	92cff9ea-4838-40cf-b541-bcb98c919c3f	740	28	28	2025-08-24T17:03:09.000429Z	0.182513	0.650802	0.785623	0.711679	0.606878	0.733802	0.731573	0.713827	0.817834	0.766035	0.630338	0.133557	0.180734	0.734474	0.690649	0.13894	0.68831	0.707778	0.400256	0.29428	0.636728	0.333469	0.736382	0.768453	0.187354	0.796874	0.742631	0.724127	0.350101	0.173399	0.610797	0.588901	0.693726	0.188269	0.157971	0.161213	0.768492	0.140935	0.770102	0.189286	0.209967	0.809955	0.169192	0.200742
6e8cd653-1834-4a9a-a460-98d648d0eefb	92cff9ea-4838-40cf-b541-bcb98c919c3f	590	28	28	2025-08-24T17:22:52.000429Z	0.257006	1.34107	1.57055	1.54297	1.18653	1.49784	1.53868	1.37146	1.76513	1.58229	1.14305	0.173459	0.32438	1.47244	1.54974	0.232549	1.59606	1.61056	0.781624	0.580381	1.41209	0.545943	1.6629	1.73103	0.257024	1.72364	1.48435	1.37165	0.548238	0.243021	1.17469	1.29332	1.41924	0.279058	0.229112	0.262016	1.67747	0.18383	1.72771	0.284646	0.317732	1.70857	0.263682	0.323723
ac2de5f0-c8d9-4e1c-bfc5-2dcae5ed802c	92cff9ea-4838-40cf-b541-bcb98c919c3f	740	28	28	2025-08-24T17:23:08.000429Z	0.182263	0.653219	0.787433	0.711242	0.606413	0.734687	0.731308	0.716663	0.818136	0.76674	0.630197	0.131367	0.180981	0.735678	0.691181	0.13856	0.687437	0.707574	0.401345	0.293287	0.636599	0.335094	0.736368	0.763683	0.187963	0.796537	0.741734	0.726095	0.350685	0.173371	0.612912	0.587603	0.694006	0.188159	0.157429	0.163596	0.763908	0.141125	0.769214	0.189838	0.210059	0.809361	0.16924	0.200772
916fd915-4534-4574-bfaf-0c6e40add2d3	92cff9ea-4838-40cf-b541-bcb98c919c3f	590	28	28	2025-08-24T17:42:52.000429Z	0.256852	1.33871	1.57371	1.54367	1.18474	1.49562	1.53704	1.37782	1.76339	1.57752	1.14278	0.167742	0.322902	1.47859	1.55082	0.232377	1.59862	1.61334	0.784954	0.589016	1.41623	0.5482	1.66762	1.72437	0.255506	1.72748	1.48642	1.37842	0.550942	0.243906	1.1807	1.29707	1.42259	0.279287	0.229163	0.262758	1.678	0.183718	1.72841	0.2854	0.319034	1.7092	0.26847	0.324902
4431e64f-63a2-4c89-b9b2-f0ffa6e4e616	92cff9ea-4838-40cf-b541-bcb98c919c3f	740	28	28	2025-08-24T17:43:08.000429Z	0.181739	0.654823	0.78879	0.710333	0.605388	0.73356	0.730656	0.720546	0.816617	0.766346	0.632895	0.130863	0.181492	0.737753	0.692235	0.138477	0.687401	0.707398	0.403046	0.294234	0.637015	0.334793	0.738	0.764159	0.188111	0.796969	0.742363	0.728442	0.352451	0.173585	0.616279	0.588268	0.693893	0.189154	0.160476	0.164209	0.765295	0.141107	0.768938	0.190503	0.210423	0.808636	0.171599	0.200974
1f0fce11-b51b-4300-8d0f-e326bc81bbb0	92cff9ea-4838-40cf-b541-bcb98c919c3f	590	28	28	2025-08-24T18:02:52.000429Z	0.255186	1.31214	1.58378	1.54429	1.18366	1.48835	1.53593	1.38204	1.76562	1.57767	1.14662	0.165802	0.325674	1.48151	1.55415	0.23178	1.59829	1.61358	0.778832	0.58361	1.41511	0.547676	1.6703	1.73481	0.2571	1.72781	1.48615	1.38132	0.552835	0.243503	1.18692	1.29698	1.41998	0.279417	0.226881	0.254332	1.68347	0.183861	1.72948	0.285964	0.318579	1.7069	0.267518	0.323897
b942fc01-f4ed-495a-8e48-87febe2adf3d	92cff9ea-4838-40cf-b541-bcb98c919c3f	740	28	28	2025-08-24T18:03:09.000429Z	0.180672	0.638912	0.792913	0.710825	0.604728	0.729923	0.729898	0.723101	0.817081	0.764655	0.636808	0.12982	0.184334	0.738757	0.693087	0.138374	0.686439	0.706664	0.400162	0.298173	0.635817	0.334657	0.739504	0.768859	0.18697	0.795229	0.741559	0.728301	0.35343	0.173472	0.618274	0.587776	0.690188	0.188557	0.159833	0.162579	0.764747	0.141004	0.767952	0.190428	0.21049	0.806201	0.171718	0.200685
1af4fe26-f0ce-4984-ac99-a3296177db08	92cff9ea-4838-40cf-b541-bcb98c919c3f	590	28	28	2025-08-24T18:22:52.000429Z	0.254538	1.31224	1.5897	1.54255	1.18423	1.48005	1.5359	1.3867	1.76463	1.57205	1.14949	0.172863	0.326968	1.48577	1.55469	0.231721	1.59764	1.61395	0.776416	0.582664	1.4146	0.548269	1.66939	1.73356	0.25887	1.72275	1.48646	1.40281	0.549509	0.243414	1.19189	1.29478	1.42183	0.278652	0.231349	0.263226	1.68623	0.183917	1.73005	0.286582	0.318456	1.70677	0.268943	0.323905
294ca6fc-0886-4dcd-8dc5-3ad577f1f197	92cff9ea-4838-40cf-b541-bcb98c919c3f	740	28	28	2025-08-24T18:23:08.000429Z	0.180375	0.638821	0.794094	0.709269	0.604437	0.728366	0.730127	0.725561	0.816045	0.760124	0.638469	0.133375	0.180744	0.741567	0.69242	0.138258	0.685504	0.704882	0.398825	0.296436	0.634743	0.334479	0.738526	0.76724	0.188223	0.792235	0.740565	0.733569	0.350945	0.173387	0.618601	0.587034	0.690261	0.188027	0.159072	0.16104	0.76588	0.140907	0.766876	0.190706	0.210219	0.806546	0.171531	0.200671
010664b2-a240-4671-9bca-d9c10e27c6a9	92cff9ea-4838-40cf-b541-bcb98c919c3f	590	28	28	2025-08-24T18:42:52.000429Z	0.25329	1.318	1.59764	1.54577	1.18202	1.47542	1.53236	1.39198	1.7688	1.5821	1.14989	0.165526	0.326757	1.49287	1.55615	0.231629	1.59668	1.61594	0.78059	0.594323	1.41665	0.549639	1.6755	1.7387	0.259262	1.71753	1.48619	1.42212	0.548279	0.24395	1.20437	1.30171	1.4285	0.280635	0.2306	0.258236	1.68638	0.183905	1.73093	0.287153	0.31973	1.70808	0.264515	0.325281
bce53558-1e81-463e-ad08-df40cdce3c91	92cff9ea-4838-40cf-b541-bcb98c919c3f	740	28	28	2025-08-24T18:43:08.000429Z	0.179963	0.641267	0.79585	0.711133	0.603028	0.726407	0.728759	0.727956	0.817148	0.765205	0.637018	0.130686	0.181082	0.743466	0.693247	0.138145	0.684598	0.705941	0.399806	0.299686	0.635376	0.334102	0.739508	0.767078	0.189125	0.78884	0.740632	0.738797	0.34958	0.173453	0.622628	0.587691	0.690827	0.188127	0.15924	0.162329	0.761529	0.140972	0.766314	0.191128	0.210687	0.806238	0.16978	0.201077
ad523750-ed83-4f27-989c-404ee7a25332	92cff9ea-4838-40cf-b541-bcb98c919c3f	590	28	28	2025-08-24T19:02:53.000429Z	0.252621	1.31923	1.6051	1.54479	1.18252	1.46833	1.53399	1.39104	1.76679	1.58008	1.15009	0.164887	0.327057	1.49757	1.55783	0.230953	1.5975	1.6162	0.778857	0.593904	1.41126	0.549858	1.6701	1.73738	0.260496	1.71831	1.48489	1.43475	0.553322	0.243395	1.20547	1.29793	1.4311	0.278176	0.228756	0.253442	1.69045	0.183936	1.73028	0.28638	0.318819	1.70863	0.259737	0.324221
bc715a04-de45-4dc6-83d3-b36a423456e9	92cff9ea-4838-40cf-b541-bcb98c919c3f	740	28	28	2025-08-24T19:03:09.000429Z	0.179055	0.642444	0.799467	0.709608	0.603104	0.72234	0.728759	0.72904	0.81595	0.766619	0.636598	0.129293	0.17997	0.745677	0.693879	0.137866	0.683396	0.704828	0.399735	0.303373	0.632065	0.335353	0.73828	0.767939	0.188619	0.788092	0.739549	0.741754	0.353285	0.173226	0.624068	0.587009	0.690069	0.188053	0.16057	0.16206	0.765913	0.140889	0.765216	0.191063	0.21064	0.805629	0.167841	0.200655
264da977-77ee-427b-bacb-5ce0fe6c61cf	92cff9ea-4838-40cf-b541-bcb98c919c3f	590	28	28	2025-08-24T19:22:53.000429Z	0.251745	1.30928	1.60956	1.54549	1.18085	1.46093	1.53147	1.39829	1.7693	1.5739	1.15353	0.16587	0.328179	1.50448	1.55954	0.23097	1.5976	1.6177	0.782037	0.602944	1.41307	0.550931	1.67416	1.72568	0.262695	1.71627	1.48846	1.43907	0.562474	0.243864	1.21707	1.30045	1.43686	0.280138	0.231924	0.259768	1.68241	0.183864	1.73132	0.286891	0.320298	1.71267	0.261186	0.325583
b7cfdc78-a43b-4bf4-bc97-da5195e00d39	92cff9ea-4838-40cf-b541-bcb98c919c3f	740	28	28	2025-08-24T19:23:09.000429Z	0.179016	0.63823	0.79923	0.710128	0.601872	0.720097	0.728174	0.730627	0.815643	0.762656	0.637081	0.130608	0.181639	0.747252	0.694149	0.137774	0.683049	0.704309	0.40024	0.303546	0.632638	0.334464	0.738775	0.766921	0.191159	0.787317	0.740765	0.743349	0.357968	0.173541	0.627171	0.587441	0.692493	0.18788	0.160103	0.162844	0.763143	0.140852	0.764438	0.190966	0.210989	0.806471	0.168427	0.201295
5fd4432a-4f94-4b9c-ad50-fe85c87df1dd	92cff9ea-4838-40cf-b541-bcb98c919c3f	590	28	28	2025-08-24T19:42:52.000429Z	0.251725	1.31682	1.61053	1.54606	1.18087	1.45866	1.53384	1.41073	1.7706	1.57403	1.15479	0.167248	0.326277	1.50946	1.55855	0.231087	1.59835	1.6179	0.786533	0.611506	1.41064	0.552756	1.67177	1.7362	0.26252	1.72507	1.48675	1.45624	0.562164	0.243616	1.21448	1.29821	1.43483	0.277462	0.233556	0.263615	1.69382	0.184155	1.73243	0.286685	0.320023	1.71287	0.262231	0.325403
[truncated: 1 more rows]
[truncated: 52 more columns]

## Sheet: Tab 9. Biolog dphage_3 PM01
Id	PlateId	Wavelength	Actual Temperature Celsius	Target Temperature Celsius	Read At	Negative Control	L-Arabinose	N-Acetyl-DGlucosamine	D-Saccharic Acid	Succinic Acid	D-Galactose	L-Aspartic Acid	L-Proline	D-Alanine	D-Trehalose	D-Mannose	Dulcitol	D-Serine	D-Sorbitol	Glycerol	L-Fucose	D-Glucuronic Acid	D-Gluconic Acid	D,L-a-Glycerol- Phosphate	D-Xylose	L-Lactic Acid	Formic Acid	D-Mannitol	L-Glutamic Acid	D-Glucose-6 Phosphate	D-Galactonic Acid-g-Lactone	D,L-Malic Acid	D-Ribose	Tween 20	L-Rhamnose	D-Fructose	Acetic Acid	a-D-Glucose	Maltose	D-Melibiose	Thymidine	L-Asparagine	D-Aspartic Acid	D-Glucosaminic Acid	1,2-Propanediol	Tween 40	a-Keto-Glutaric Acid	a-Keto-Butyric Acid	a-Methyl-DGalactoside
[truncated: 288 more rows]
[truncated: 52 more columns]

[truncated: 32 more sheets: Tab 10. Biolog dphage_4 PM01, Tab 11. Biolog dphage_5 PM01, Tab 12. Biolog dphage_6 PM01, Tab 13. Biolog dphage_7 PM01, Tab 14. Biolog dphage_8 PM01, Tab 15. Biolog dphage_9 PM01, Tab 16. Biolog SB642_1 PM01, Tab 17. Biolog SB642_2 PM01, Tab 18. Biolog SB642_3 PM01, Tab 19. Biolog SB642_4 PM01, Tab 20. Biolog SB642_5 PM01, Tab 21. Biolog SB642_6 PM01, Tab 22. Biolog SB642_7 PM01, Tab 23. Biolog SB642_8 PM01, Tab 24. Biolog SB642_9 PM01, Tab 25. Biolog dphage_1 PM02, Tab 26. Biolog dphage_2 PM02, Tab 27. Biolog dphage_3 PM02, Tab 28. Biolog dphage_4 PM02, Tab 29. Biolog dphage_5 PM02 …]
